# Supplementary material for: Functional transcriptomic landscape informs novel therapeutic strategies in multiple myeloma
Source: Research Square preprint supplement (doi:10.21203/rs.3.rs-1723993/v1), 2022-07-06
Supplement: Supplementary file 2 [file 97a4764a94b2a7812f1206f4.xlsx]

## Sheet: DiseaseState_AUC
DrugName	DiseaseState	Median_Difference_AUC	Nominal_p_value	FDR_q_value	FWER_q_value
ABT-199	ERMM	5.37938	0.0426841	0.128052	0.128052
ABT-199	LRMM	4.14033	0.131956	0.131956	0.131956
ABT-199	NDMM	-6.56617	0.0637019	0.0955528	0.127404
ALISERTIB	ERMM	-3.13299	0.889612	1.33442	1.77922
ALISERTIB	LRMM	1.56315	0.916933	0.916933	0.916933
ALISERTIB	NDMM	4.46078	0.163136	0.489409	0.489409
BI2536	ERMM	-4.84972	0.442432	0.442432	0.442432
BI2536	LRMM	4.52581	0.238674	0.358011	0.477347
BI2536	NDMM	-6.98254	0.162768	0.488303	0.488303
BTZ	ERMM	3.30874	0.0987271	0.296181	0.296181
BTZ	LRMM	2.58555	0.232053	0.232053	0.232053
BTZ	NDMM	-1.6753	0.157904	0.236856	0.315808
CFZ	ERMM	1.53865	0.353583	0.353583	0.353583
CFZ	LRMM	5.0995	0.0131202	0.0393606	0.0393606
CFZ	NDMM	-2.44171	0.06849	0.102735	0.13698
CPD22	ERMM	-0.767442	0.0869468	0.260841	0.260841
CPD22	LRMM	-4.29939	0.244935	0.367402	0.48987
CPD22	NDMM	3.50865	0.542658	0.542658	0.542658
CRIZOTINIB	ERMM	-1.53382	0.274525	0.274525	0.274525
CRIZOTINIB	LRMM	9.52832	0.150567	0.4517	0.4517
CRIZOTINIB	NDMM	-9.23678	0.171108	0.256662	0.342216
DABRAFENIB	ERMM	-2.67805	0.274776	0.824329	0.824329
DABRAFENIB	LRMM	3.46607	0.397509	0.596264	0.795018
DABRAFENIB	NDMM	-3.00942	0.928667	0.928667	0.928667
DARATUMUMAB	ERMM	1.96426	0.600042	0.900063	1.20008
DARATUMUMAB	LRMM	-0.547067	0.689344	0.689344	0.689344
DARATUMUMAB	NDMM	-1.96675	0.211051	0.633154	0.633154
DEFACTINIB	ERMM	-3.72217	0.198118	0.594354	0.594354
DEFACTINIB	LRMM	3.30843	0.344288	0.516433	0.688577
DEFACTINIB	NDMM	-0.366069	0.848228	0.848228	0.848228
DEX	ERMM	-1.26471	0.864132	0.864132	0.864132
DEX	LRMM	3.77522	0.00136775	0.00410324	0.00410324
DEX	NDMM	-2.15232	0.00570191	0.00855286	0.0114038
DINACICLIB	ERMM	2.31644	0.793209	1.18981	1.58642
DINACICLIB	LRMM	-2.76445	0.829283	0.829283	0.829283
DINACICLIB	NDMM	-1.97152	0.619559	1.85868	1.85868
DOX	ERMM	-1.81642	0.635069	1.90521	1.90521
DOX	LRMM	0.489818	0.905505	0.905505	0.905505
DOX	NDMM	1.81505	0.689052	1.03358	1.3781
ELEVENOSTAT	ERMM	-7.18291	0.0817881	0.245364	0.245364
ELEVENOSTAT	LRMM	-3.68507	0.622099	0.622099	0.622099
ELEVENOSTAT	NDMM	4.94219	0.619523	0.929285	1.23905
ELOTUZUMAB	ERMM	0.109995	0.816567	0.816567	0.816567
ELOTUZUMAB	LRMM	0.109995	0.160646	0.481938	0.481938
ELOTUZUMAB	NDMM	-0.219785	0.412268	0.618403	0.824537
INK128	ERMM	3.04297	0.68188	1.02282	1.36376
INK128	LRMM	0.163153	0.770264	0.770264	0.770264
INK128	NDMM	-1.95186	0.437308	1.31192	1.31192
IXAZOMIB	ERMM	2.12848	0.18491	0.554731	0.554731
IXAZOMIB	LRMM	5.4937	0.191769	0.287654	0.383538
IXAZOMIB	NDMM	-2.97055	0.347018	0.347018	0.347018
JNK-IN-8	ERMM	1.3611	0.498858	0.748286	0.997715
JNK-IN-8	LRMM	0.205388	0.723575	0.723575	0.723575
JNK-IN-8	NDMM	-1.3611	0.300394	0.901183	0.901183
KPT	ERMM	-2.36155	0.450508	0.450508	0.450508
KPT	LRMM	-2.98079	0.431939	0.647908	0.863878
KPT	NDMM	4.35531	0.349793	1.04938	1.04938
LEN	ERMM	-0.545105	0.402918	1.20875	1.20875
LEN	LRMM	-0.0580598	0.874249	0.874249	0.874249
LEN	NDMM	0.190373	0.694812	1.04222	1.38962
MA7-038	ERMM	1.90384	0.392571	0.588857	0.785143
MA7-038	LRMM	-0.299485	0.945999	0.945999	0.945999
MA7-038	NDMM	-2.1132	0.372	1.116	1.116
MARK-INHIBITOR	ERMM	0.635208	0.487482	1.46245	1.46245
MARK-INHIBITOR	LRMM	1.49524	0.973371	0.973371	0.973371
MARK-INHIBITOR	NDMM	-3.69792	0.542693	0.81404	1.08539
MEL	ERMM	0.358367	0.778808	0.778808	0.778808
MEL	LRMM	0.578276	0.55016	0.825239	1.10032
MEL	NDMM	-2.02574	0.19342	0.580259	0.580259
MK2206	ERMM	-0.606713	0.384331	0.576496	0.768661
MK2206	LRMM	1.68736	0.203236	0.609707	0.609707
MK2206	NDMM	0.963647	0.620353	0.620353	0.620353
MOTESANIB	ERMM	-3.34316	0.0274303	0.082291	0.082291
MOTESANIB	LRMM	4.00604	0.0455854	0.068378	0.0911707
MOTESANIB	NDMM	-1.03148	0.868017	0.868017	0.868017
NU-7441	ERMM	2.51148	0.0791009	0.237303	0.237303
NU-7441	LRMM	0.277551	0.352124	0.528186	0.704249
NU-7441	NDMM	-3.55132	0.426343	0.426343	0.426343
PALBOCICLIB	ERMM	0.0344959	0.813047	0.813047	0.813047
PALBOCICLIB	LRMM	5.11263	0.611161	0.916741	1.22232
PALBOCICLIB	NDMM	-8.08488	0.123038	0.369115	0.369115
PANOBINOSTAT	ERMM	-0.445904	0.11698	0.17547	0.233959
PANOBINOSTAT	LRMM	-2.6528	0.115953	0.347858	0.347858
PANOBINOSTAT	NDMM	-0.0270253	0.417431	0.417431	0.417431
POM	ERMM	-0.606117	0.304175	0.304175	0.304175
POM	LRMM	-0.609135	0.296286	0.444429	0.592572
POM	NDMM	0.623995	0.195688	0.587064	0.587064
PONATINIB	ERMM	3.76656	0.849014	0.849014	0.849014
PONATINIB	LRMM	4.54316	0.412401	0.618602	0.824803
PONATINIB	NDMM	-8.44674	0.0293761	0.0881284	0.0881284
PYRVINIUM	ERMM	10.786	0.0215369	0.0646106	0.0646106
PYRVINIUM	LRMM	2.87888	0.157743	0.236614	0.315486
PYRVINIUM	NDMM	-6.24501	0.388891	0.388891	0.388891
R406	ERMM	4.07965	0.326591	0.489887	0.653182
R406	LRMM	0.80962	0.3175	0.9525	0.9525
R406	NDMM	-5.0621	0.985479	0.985479	0.985479
RICOLINOSTAT	ERMM	1.24629	0.744523	2.23357	2.23357
RICOLINOSTAT	LRMM	-1.24629	0.96473	0.96473	0.96473
RICOLINOSTAT	NDMM	-6.90885	0.767679	1.15152	1.53536
RUXOLITINIB	ERMM	-4.44607	0.743941	1.11591	1.48788
RUXOLITINIB	LRMM	2.40595	0.896863	0.896863	0.896863
RUXOLITINIB	NDMM	0.326468	0.408163	1.22449	1.22449
SILMITASERTIB	ERMM	6.3431	0.0983826	0.295148	0.295148
SILMITASERTIB	LRMM	-2.6167	0.231574	0.347361	0.463148
SILMITASERTIB	NDMM	-5.47198	0.525447	0.525447	0.525447
TAI-1	ERMM	9.00023	0.214916	0.322374	0.429832
TAI-1	LRMM	-5.55919	0.0401963	0.120589	0.120589
TAI-1	NDMM	-1.91884	0.44361	0.44361	0.44361
THZ1	ERMM	1.90399	0.510856	0.766285	1.02171
THZ1	LRMM	-0.473645	0.985694	0.985694	0.985694
THZ1	NDMM	-1.90399	0.441034	1.3231	1.3231
VOLASERTIB	ERMM	0.792395	0.515891	0.515891	0.515891
VOLASERTIB	LRMM	-1.39267	0.48893	0.733396	0.977861
VOLASERTIB	NDMM	8.67766	0.155882	0.467646	0.467646

## Sheet: DiseaseState_LD50_LD20
DrugName	DiseaseState	LD50_log2_Fold_Change	LD50_Nominal_p_value	LD20_log2_Fold_Change	LD20_Nominal_p_value	LD50_FDR_q_value	LD50_FWER_q_value	LD20_FDR_q_value	LD20_FWER_q_value
ABT-199	ERMM	-0.0684411	0.755519	-1.83211	0.274305	0.755519	0.755519	0.411458	0.54861
ABT-199	LRMM	-0.53555	0.286031	1.83409	0.190207	0.429047	0.572063	0.570622	0.570622
ABT-199	NDMM	1.05666	0.0851486	-0.695899	0.894582	0.255446	0.255446	0.894582	0.894582
ALISERTIB	ERMM	NaN	NaN	0.0713556	0.618634	NaN	NaN	0.927951	1.23727
ALISERTIB	LRMM	NaN	NaN	-0.277033	0.571364	NaN	NaN	1.71409	1.71409
ALISERTIB	NDMM	NaN	NaN	NaN	NaN	NaN	NaN	NaN	NaN
BI2536	ERMM	-0.140139	0.370446	-2.62362	0.0232733	0.555668	0.740891	0.06982	0.06982
BI2536	LRMM	0.099267	0.225548	2.02596	0.245997	0.676643	0.676643	0.368995	0.491993
BI2536	NDMM	0.104899	0.690602	1.10311	0.964537	0.690602	0.690602	0.964537	0.964537
BTZ	ERMM	0.236067	0.29865	0.183907	0.759602	0.895949	0.895949	0.759602	0.759602
BTZ	LRMM	0.313275	0.435853	0.422626	0.0736533	0.65378	0.871707	0.22096	0.22096
BTZ	NDMM	-0.211946	0.688264	-0.468393	0.532457	0.688264	0.688264	0.798685	1.06491
CFZ	ERMM	0.197481	0.0426405	-0.00692415	0.598037	0.0639607	0.0852809	0.598037	0.598037
CFZ	LRMM	0.603297	0.0927094	0.727697	0.00407899	0.0927094	0.0927094	0.012237	0.012237
CFZ	NDMM	-0.439442	0.0224776	-0.565923	0.021163	0.0674328	0.0674328	0.0317445	0.0423259
CPD22	ERMM	-0.0249824	0.559203	0.0331247	0.831436	1.67761	1.67761	0.831436	0.831436
CPD22	LRMM	-0.126948	0.859897	-0.392824	0.563417	0.859897	0.859897	0.845125	1.12683
CPD22	NDMM	0.210645	0.674554	0.381467	0.405119	1.01183	1.34911	1.21536	1.21536
CRIZOTINIB	ERMM	-0.143242	0.129745	-0.506089	0.0690353	0.194617	0.259489	0.103553	0.138071
CRIZOTINIB	LRMM	0.516576	0.0146001	0.616877	0.0537532	0.0438002	0.0438002	0.161259	0.161259
CRIZOTINIB	NDMM	-0.363622	0.257265	-0.168321	0.820734	0.257265	0.257265	0.820734	0.820734
DABRAFENIB	ERMM	NaN	NaN	1.75171	0.311903	NaN	NaN	0.93571	0.93571
DABRAFENIB	LRMM	NaN	NaN	-1.75171	0.311903	NaN	NaN	0.467855	0.623806
DABRAFENIB	NDMM	NaN	NaN	NaN	NaN	NaN	NaN	NaN	NaN
DARATUMUMAB	ERMM	NaN	NaN	-5.9267	0.402319	NaN	NaN	1.20696	1.20696
DARATUMUMAB	LRMM	NaN	NaN	NaN	NaN	NaN	NaN	NaN	NaN
DARATUMUMAB	NDMM	NaN	NaN	5.9267	0.402319	NaN	NaN	0.603479	0.804638
DEFACTINIB	ERMM	-0.0292646	0.447156	-0.0497461	0.61807	0.670735	0.894313	0.61807	0.61807
DEFACTINIB	LRMM	0.249172	0.285522	0.494254	0.242375	0.856565	0.856565	0.727124	0.727124
DEFACTINIB	NDMM	-0.0301688	0.952189	-0.305959	0.340345	0.952189	0.952189	0.510517	0.68069
DEX	ERMM	-1.16789	0.904138	0.138283	0.0705034	1.35621	1.80828	0.105755	0.141007
DEX	LRMM	2.12928	0.916774	0.153052	0.0700033	0.916774	0.916774	0.21001	0.21001
DEX	NDMM	1.00843	0.771644	-0.137753	0.668873	2.31493	2.31493	0.668873	0.668873
DINACICLIB	ERMM	-0.0522562	0.843946	-0.591464	0.419365	0.843946	0.843946	0.419365	0.419365
DINACICLIB	LRMM	0.125531	0.179745	0.593383	0.0977015	0.539235	0.539235	0.293105	0.293105
DINACICLIB	NDMM	-0.0698214	0.259024	0.210997	0.413146	0.388535	0.518047	0.619719	0.826292
DOX	ERMM	0.0380095	0.740901	0.194041	0.462326	0.740901	0.740901	0.693489	0.924653
DOX	LRMM	0.0448875	0.566301	-0.0255425	0.701393	0.849452	1.1326	0.701393	0.701393
DOX	NDMM	-0.215628	0.0412256	-0.315319	0.178678	0.123677	0.123677	0.536033	0.536033
ELEVENOSTAT	ERMM	-0.0586759	0.913966	-0.198809	0.502206	0.913966	0.913966	0.502206	0.502206
ELEVENOSTAT	LRMM	0.390739	0.0519778	0.53951	0.0812507	0.155933	0.155933	0.121876	0.162501
ELEVENOSTAT	NDMM	-0.778306	0.092194	-0.660885	0.0523426	0.138291	0.184388	0.157028	0.157028
ELOTUZUMAB	ERMM	NaN	NaN	NaN	NaN	NaN	NaN	NaN	NaN
ELOTUZUMAB	LRMM	NaN	NaN	NaN	NaN	NaN	NaN	NaN	NaN
ELOTUZUMAB	NDMM	NaN	NaN	2.03481	NaN	NaN	NaN	NaN	NaN
INK128	ERMM	-0.545798	0.543311	-0.117865	0.21369	0.814966	1.08662	0.641071	0.641071
INK128	LRMM	1.60355	0.376631	0.113279	0.407528	1.12989	1.12989	0.611292	0.815056
INK128	NDMM	-3.57721	0.958961	0.1247	0.633097	0.958961	0.958961	0.633097	0.633097
IXAZOMIB	ERMM	0.366916	0.141693	0.510836	0.348758	0.42508	0.42508	0.348758	0.348758
IXAZOMIB	LRMM	0.152622	0.196381	0.168184	0.0896432	0.196381	0.196381	0.268929	0.268929
IXAZOMIB	NDMM	-0.283307	0.16012	-0.421997	0.197634	0.24018	0.32024	0.296451	0.395268
JNK-IN-8	ERMM	0.179994	0.467147	-0.199144	0.335855	0.70072	0.934293	0.503782	0.67171
JNK-IN-8	LRMM	-0.0752063	0.942209	0.173325	0.137618	0.942209	0.942209	0.412854	0.412854
JNK-IN-8	NDMM	-0.160072	0.435183	-0.0127381	0.621257	1.30555	1.30555	0.621257	0.621257
KPT	ERMM	-0.358855	0.397087	-0.709892	0.295829	0.397087	0.397087	0.295829	0.295829
KPT	LRMM	-0.806761	0.185419	-0.331637	0.287861	0.278129	0.370838	0.431791	0.575722
KPT	NDMM	0.957565	0.0403163	0.697267	0.104119	0.120949	0.120949	0.312358	0.312358
LEN	ERMM	-1.81705	0.152933	-0.835122	0.353026	0.229399	0.305866	0.529539	0.706052
LEN	LRMM	-0.708951	0.66622	1.26636	0.151379	0.66622	0.66622	0.454138	0.454138
LEN	NDMM	1.42428	0.010841	0.232832	0.902254	0.0325229	0.0325229	0.902254	0.902254
MA7-038	ERMM	NaN	NaN	4.54696	NaN	NaN	NaN	NaN	NaN
MA7-038	LRMM	NaN	NaN	-4.54696	NaN	NaN	NaN	NaN	NaN
MA7-038	NDMM	NaN	NaN	NaN	NaN	NaN	NaN	NaN	NaN
MARK-INHIBITOR	ERMM	NaN	NaN	0.311873	0.252695	NaN	NaN	0.758084	0.758084
MARK-INHIBITOR	LRMM	NaN	NaN	-0.288276	0.413972	NaN	NaN	0.620958	0.827944
MARK-INHIBITOR	NDMM	NaN	NaN	-0.0443681	0.919361	NaN	NaN	0.919361	0.919361
MEL	ERMM	0.0972972	0.81062	0.503549	0.339826	0.81062	0.81062	0.509739	0.679652
MEL	LRMM	-0.199593	0.809626	-1.0683	0.420524	1.21444	1.61925	0.420524	0.420524
MEL	NDMM	-0.276413	0.070908	-0.41135	0.103654	0.212724	0.212724	0.310963	0.310963
MK2206	ERMM	0.0286693	0.286059	-1.3321	0.688693	0.429089	0.572118	0.688693	0.688693
MK2206	LRMM	0.171089	0.18127	2.2624	0.211864	0.54381	0.54381	0.635591	0.635591
MK2206	NDMM	-0.0682252	0.913575	-1.28396	0.320176	0.913575	0.913575	0.480264	0.640352
MOTESANIB	ERMM	NaN	NaN	-0.75997	0.295583	NaN	NaN	0.88675	0.88675
MOTESANIB	LRMM	NaN	NaN	NaN	NaN	NaN	NaN	NaN	NaN
MOTESANIB	NDMM	NaN	NaN	0.75997	0.295583	NaN	NaN	0.443375	0.591167
NU-7441	ERMM	NaN	NaN	0.654656	0.303726	NaN	NaN	0.911179	0.911179
NU-7441	LRMM	NaN	NaN	-0.0218229	0.854764	NaN	NaN	0.854764	0.854764
NU-7441	NDMM	NaN	NaN	-0.354534	0.501096	NaN	NaN	0.751644	1.00219
PALBOCICLIB	ERMM	0.301771	0.486331	-0.053154	0.65583	0.729497	0.972662	0.65583	0.65583
PALBOCICLIB	LRMM	-0.206614	0.475006	0.0945528	0.136028	1.42502	1.42502	0.408084	0.408084
PALBOCICLIB	NDMM	0.206614	0.939244	-0.140131	0.220082	0.939244	0.939244	0.330123	0.440164
PANOBINOSTAT	ERMM	-0.0228745	0.181412	-0.144963	0.0592239	0.544236	0.544236	0.177672	0.177672
PANOBINOSTAT	LRMM	-0.0886576	0.499907	-0.0964287	0.103213	0.749861	0.999814	0.15482	0.206427
PANOBINOSTAT	NDMM	-0.0421966	0.887953	0.0177591	0.746667	0.887953	0.887953	0.746667	0.746667
POM	ERMM	-1.93213	0.0647982	-1.06118	0.720121	0.194395	0.194395	0.720121	0.720121
POM	LRMM	1.65755	0.442925	-1.33815	0.0772779	0.442925	0.442925	0.231834	0.231834
POM	NDMM	1.34071	0.0765972	2.54695	0.266393	0.114896	0.153194	0.39959	0.532787
PONATINIB	ERMM	0.0126	0.766783	0.409223	0.408325	0.766783	0.766783	0.612487	0.81665
PONATINIB	LRMM	0.0976711	0.417603	0.91079	0.419255	0.626405	0.835206	0.419255	0.419255
PONATINIB	NDMM	-0.125896	0.189221	-1.9441	0.113679	0.567662	0.567662	0.341037	0.341037
PYRVINIUM	ERMM	0.860854	0.248255	0.561557	0.193961	0.744764	0.744764	0.581884	0.581884
PYRVINIUM	LRMM	-0.711431	0.773525	-0.71057	0.437815	0.773525	0.773525	0.656722	0.875629
PYRVINIUM	NDMM	-0.09586	0.374242	0.2605	0.588424	0.561364	0.748485	0.588424	0.588424
R406	ERMM	1.3988	0.0919536	1.05231	0.0368719	0.275861	0.275861	0.110616	0.110616
R406	LRMM	-1.44184	0.201045	0.418952	0.69671	0.301568	0.402091	0.69671	0.69671
R406	NDMM	-1	0.664352	-1.34455	0.0893202	0.664352	0.664352	0.13398	0.17864
RICOLINOSTAT	ERMM	-0.472391	0.401367	0.198505	0.89577	1.2041	1.2041	0.89577	0.89577
RICOLINOSTAT	LRMM	0.226858	0.478264	1.13397	0.0425583	0.717395	0.956527	0.0638374	0.0851166
RICOLINOSTAT	NDMM	-0.0659094	0.93799	-1.24773	0.0214591	0.93799	0.93799	0.0643772	0.0643772
RUXOLITINIB	ERMM	NaN	NaN	1.43898	0.941951	NaN	NaN	0.941951	0.941951
RUXOLITINIB	LRMM	2.50001	0.709756	-0.00454628	0.612454	2.12927	2.12927	0.918681	1.22491
RUXOLITINIB	NDMM	-2.50001	0.709756	-2.09784	0.398026	1.06463	1.41951	1.19408	1.19408
SILMITASERTIB	ERMM	0.64689	0.59822	1.0237	0.0568439	0.59822	0.59822	0.170532	0.170532
SILMITASERTIB	LRMM	-0.795859	0.246732	-0.449889	0.44585	0.740195	0.740195	0.44585	0.44585
SILMITASERTIB	NDMM	0.62885	0.45046	-1.19852	0.134016	0.67569	0.90092	0.201024	0.268032
TAI-1	ERMM	0.0974261	0.911835	0.412663	0.608494	0.911835	0.911835	1.82548	1.82548
TAI-1	LRMM	-1.3799	0.42652	-1.44372	0.736482	0.63978	0.853041	1.10472	1.47296
TAI-1	NDMM	1.67738	0.174615	0.266958	0.88626	0.523845	0.523845	0.88626	0.88626
THZ1	ERMM	-0.4441	0.0991252	0.0799322	0.341898	0.297376	0.297376	0.512846	0.683795
THZ1	LRMM	0.440573	0.177326	0.240661	0.238463	0.265989	0.354652	0.715388	0.715388
THZ1	NDMM	0.427421	0.773519	-0.0799322	0.773379	0.773519	0.773519	0.773379	0.773379
VOLASERTIB	ERMM	0.199243	0.377599	0.558367	0.233925	0.377599	0.377599	0.701776	0.701776
VOLASERTIB	LRMM	-0.225162	0.00586804	-0.533728	0.337811	0.0176041	0.0176041	0.506716	0.675622
VOLASERTIB	NDMM	-0.0209781	0.0584034	-0.47878	0.775157	0.0876051	0.116807	0.775157	0.775157

## Sheet: Cytogenetics_AUC
DrugName	Cytogenetic_Abnormality	Median_Difference_AUC	Nominal_p_value	FDR_q_value	FWER_q_value
A-1210477	t11_14_	1.5711	0.916779	1.06958	1.83356
A-1210477	t14_16_	7.67587	0.264003	0.616008	1.32002
A-1210477	t4_14_	-19.4793	0.109731	0.768117	0.768117
A-1210477	del_1p_	NaN	NaN	NaN	NaN
A-1210477	del_13q_	8.46946	0.198496	0.694737	1.19098
A-1210477	del_17p_	7.3913	0.335467	0.587067	1.34187
A-1210477	amp_dup_1q21_	3.80827	0.717269	1.00418	2.15181
ABBVIE1	t11_14_	-18.3735	4.28746e-05	0.000300123	0.000300123
ABBVIE1	t14_16_	NaN	NaN	NaN	NaN
ABBVIE1	t4_14_	5.97765	0.0720589	0.168137	0.360295
ABBVIE1	del_1p_	0.508245	0.587567	0.685494	1.17513
ABBVIE1	del_13q_	1.29237	0.15765	0.22071	0.472949
ABBVIE1	del_17p_	3.40238	0.141727	0.248023	0.566909
ABBVIE1	amp_dup_1q21_	12.0239	0.00786006	0.0275102	0.0471604
ABT-199	t11_14_	-9.07298	0.002035	0.014245	0.014245
ABT-199	t14_16_	-1.06646	0.252836	0.294975	0.505672
ABT-199	t4_14_	6.85062	0.0223465	0.0521419	0.111733
ABT-199	del_1p_	-0.899275	0.841359	0.841359	0.841359
ABT-199	del_13q_	5.23446	0.148078	0.259137	0.592312
ABT-199	del_17p_	1.65745	0.17816	0.249424	0.534479
ABT-199	amp_dup_1q21_	7.05209	0.00812617	0.0284416	0.048757
ADAVOSERTIB	t11_14_	NaN	NaN	NaN	NaN
ADAVOSERTIB	t14_16_	NaN	NaN	NaN	NaN
ADAVOSERTIB	t4_14_	-17.6925	0.302798	2.11958	2.11958
ADAVOSERTIB	del_1p_	NaN	NaN	NaN	NaN
ADAVOSERTIB	del_13q_	7.80717	0.588765	2.06068	3.53259
ADAVOSERTIB	del_17p_	-3.48366	0.799077	1.39838	3.19631
ADAVOSERTIB	amp_dup_1q21_	-6.65603	0.634647	1.48084	3.17323
ALISERTIB	t11_14_	-5.96666	0.202623	1.41836	1.41836
ALISERTIB	t14_16_	NaN	NaN	NaN	NaN
ALISERTIB	t4_14_	0.726076	0.53305	1.86568	3.1983
ALISERTIB	del_1p_	NaN	NaN	NaN	NaN
ALISERTIB	del_13q_	-0.540205	0.97591	1.70784	3.90364
ALISERTIB	del_17p_	-1.19678	0.984849	1.37879	2.95455
ALISERTIB	amp_dup_1q21_	0.774522	0.916984	2.13963	4.58492
AZ-628	t11_14_	NaN	NaN	NaN	NaN
AZ-628	t14_16_	NaN	NaN	NaN	NaN
AZ-628	t4_14_	-12.2789	0.167852	1.17497	1.17497
AZ-628	del_1p_	NaN	NaN	NaN	NaN
AZ-628	del_13q_	NaN	NaN	NaN	NaN
AZ-628	del_17p_	NaN	NaN	NaN	NaN
AZ-628	amp_dup_1q21_	11.524	0.222622	0.779177	1.33573
AZD1480	t11_14_	-1.23832	0.820607	1.91475	4.10303
AZD1480	t14_16_	NaN	NaN	NaN	NaN
AZD1480	t4_14_	NaN	NaN	NaN	NaN
AZD1480	del_1p_	NaN	NaN	NaN	NaN
AZD1480	del_13q_	0.364562	0.771043	2.69865	4.62626
AZD1480	del_17p_	NaN	NaN	NaN	NaN
AZD1480	amp_dup_1q21_	0.612082	0.617291	4.32104	4.32104
AZD7762	t11_14_	NaN	NaN	NaN	NaN
AZD7762	t14_16_	NaN	NaN	NaN	NaN
AZD7762	t4_14_	1.82113	0.977548	1.71071	3.91019
AZD7762	del_1p_	NaN	NaN	NaN	NaN
AZD7762	del_13q_	3.89756	0.799107	1.86458	3.99553
AZD7762	del_17p_	13.6879	0.238489	0.834712	1.43094
AZD7762	amp_dup_1q21_	-18.1585	0.115674	0.80972	0.80972
BI2536	t11_14_	4.2642	0.12385	0.433474	0.743098
BI2536	t14_16_	1.22975	0.964423	0.964423	0.964423
BI2536	t4_14_	-18.1322	0.0704645	0.493251	0.493251
BI2536	del_1p_	-10.9302	0.154114	0.3596	0.77057
BI2536	del_13q_	1.84844	0.363413	0.423982	0.726826
BI2536	del_17p_	4.61089	0.281899	0.394659	0.845698
BI2536	amp_dup_1q21_	-5.4394	0.17206	0.301106	0.688241
BMS754807	t11_14_	6.68528	0.181983	0.63694	1.0919
BMS754807	t14_16_	NaN	NaN	NaN	NaN
BMS754807	t4_14_	NaN	NaN	NaN	NaN
BMS754807	del_1p_	NaN	NaN	NaN	NaN
BMS754807	del_13q_	1.23454	0.811921	1.89448	4.0596
BMS754807	del_17p_	NaN	NaN	NaN	NaN
BMS754807	amp_dup_1q21_	-4.60976	0.154951	1.08466	1.08466
BMS777607	t11_14_	0.498659	0.320245	2.24171	2.24171
BMS777607	t14_16_	NaN	NaN	NaN	NaN
BMS777607	t4_14_	NaN	NaN	NaN	NaN
BMS777607	del_1p_	NaN	NaN	NaN	NaN
BMS777607	del_13q_	-0.684957	0.47103	1.09907	2.35515
BMS777607	del_17p_	NaN	NaN	NaN	NaN
BMS777607	amp_dup_1q21_	-0.498659	0.320245	1.12086	1.92147
BTZ	t11_14_	9.95241	5.0972e-05	0.000356804	0.000356804
BTZ	t14_16_	3.23792	0.606154	0.606154	0.606154
BTZ	t4_14_	-1.94756	0.413418	0.723481	1.65367
BTZ	del_1p_	-8.83269	0.014192	0.0331147	0.07096
BTZ	del_13q_	-3.06276	0.511485	0.716079	1.53446
BTZ	del_17p_	-0.621664	0.605042	0.705882	1.21008
BTZ	amp_dup_1q21_	-6.60686	0.00459177	0.0160712	0.0275506
CFZ	t11_14_	8.41905	0.0409506	0.143327	0.245704
CFZ	t14_16_	7.82229	0.345398	0.604446	1.38159
CFZ	t4_14_	3.83941	0.717231	0.836769	1.43446
CFZ	del_1p_	-9.92255	0.0270834	0.189584	0.189584
CFZ	del_13q_	1.42829	0.383893	0.53745	1.15168
CFZ	del_17p_	-1.67666	0.746567	0.746567	0.746567
CFZ	amp_dup_1q21_	-3.67305	0.142641	0.332829	0.713205
CGP-60474	t11_14_	NaN	NaN	NaN	NaN
CGP-60474	t14_16_	NaN	NaN	NaN	NaN
CGP-60474	t4_14_	-17.1423	0.166195	0.581683	0.997171
CGP-60474	del_1p_	NaN	NaN	NaN	NaN
CGP-60474	del_13q_	NaN	NaN	NaN	NaN
CGP-60474	del_17p_	NaN	NaN	NaN	NaN
CGP-60474	amp_dup_1q21_	-17.6937	0.134762	0.943334	0.943334
CPD22	t11_14_	2.88459	0.154241	1.07968	1.07968
CPD22	t14_16_	NaN	NaN	NaN	NaN
CPD22	t4_14_	-2.75983	0.714778	1.25086	2.85911
CPD22	del_1p_	-2.42436	0.807683	1.13076	2.42305
CPD22	del_13q_	6.35438	0.639078	1.49118	3.19539
CPD22	del_17p_	4.59672	0.3611	1.26385	2.1666
CPD22	amp_dup_1q21_	3.2778	0.966014	1.12702	1.93203
CRIZOTINIB	t11_14_	6.87711	0.193568	0.451658	0.967838
CRIZOTINIB	t14_16_	-17.1491	0.0882403	0.617682	0.617682
CRIZOTINIB	t4_14_	-10.1765	0.387483	0.678094	1.54993
CRIZOTINIB	del_1p_	NaN	NaN	NaN	NaN
CRIZOTINIB	del_13q_	0.366964	0.397267	0.556174	1.1918
CRIZOTINIB	del_17p_	-5.83294	0.637426	0.743664	1.27485
CRIZOTINIB	amp_dup_1q21_	-5.54338	0.0991273	0.346946	0.594764
DABRAFENIB	t11_14_	-0.713493	0.687812	1.60489	3.43906
DABRAFENIB	t14_16_	NaN	NaN	NaN	NaN
DABRAFENIB	t4_14_	-0.677381	0.677264	2.37043	4.06359
DABRAFENIB	del_1p_	NaN	NaN	NaN	NaN
DABRAFENIB	del_13q_	-2.24221	0.746767	1.04547	2.2403
DABRAFENIB	del_17p_	2.92954	0.366492	2.56545	2.56545
DABRAFENIB	amp_dup_1q21_	3.50218	0.735593	1.28729	2.94237
DARATUMUMAB	t11_14_	-1.51686	0.533194	0.62206	1.06639
DARATUMUMAB	t14_16_	0.606174	0.372598	0.652046	1.49039
DARATUMUMAB	t4_14_	1.41756	0.750137	0.750137	0.750137
DARATUMUMAB	del_1p_	1.4236	0.219043	0.5111	1.09521
DARATUMUMAB	del_13q_	1.38536	0.52581	0.736134	1.57743
DARATUMUMAB	del_17p_	-1.97759	0.185039	0.647637	1.11023
DARATUMUMAB	amp_dup_1q21_	1.98757	0.0434158	0.303911	0.303911
DASATINIB	t11_14_	2.46376	0.639105	2.23687	3.83463
DASATINIB	t14_16_	NaN	NaN	NaN	NaN
DASATINIB	t4_14_	NaN	NaN	NaN	NaN
DASATINIB	del_1p_	NaN	NaN	NaN	NaN
DASATINIB	del_13q_	6.10209	0.0697295	0.488106	0.488106
DASATINIB	del_17p_	NaN	NaN	NaN	NaN
DASATINIB	amp_dup_1q21_	-0.394639	0.742053	1.73146	3.71026
DEX	t11_14_	2.98267	0.0862166	0.603516	0.603516
DEX	t14_16_	-2.94817	0.731265	0.853143	1.46253
DEX	t4_14_	4.81421	0.171813	0.400897	0.859065
DEX	del_1p_	3.31462	0.0874612	0.306114	0.524767
DEX	del_13q_	3.88573	0.341519	0.597658	1.36608
DEX	del_17p_	1.61868	0.644874	0.902823	1.93462
DEX	amp_dup_1q21_	-1.72243	0.996351	0.996351	0.996351
DINACICLIB	t11_14_	4.45725	0.141842	0.992891	0.992891
DINACICLIB	t14_16_	-2.84418	0.385946	0.675406	1.54379
DINACICLIB	t4_14_	1.43189	0.807837	0.807837	0.807837
DINACICLIB	del_1p_	-5.22619	0.322495	1.12873	1.93497
DINACICLIB	del_13q_	1.56066	0.372459	0.869071	1.8623
DINACICLIB	del_17p_	-0.980862	0.793433	0.925671	1.58687
DINACICLIB	amp_dup_1q21_	-5.53031	0.43073	0.603022	1.29219
DOVITINIB	t11_14_	NaN	NaN	NaN	NaN
DOVITINIB	t14_16_	NaN	NaN	NaN	NaN
DOVITINIB	t4_14_	-5.33236	0.471316	1.64961	2.8279
DOVITINIB	del_1p_	NaN	NaN	NaN	NaN
DOVITINIB	del_13q_	NaN	NaN	NaN	NaN
DOVITINIB	del_17p_	NaN	NaN	NaN	NaN
DOVITINIB	amp_dup_1q21_	8.11268	0.264224	1.84957	1.84957
DOX	t11_14_	4.16992	0.0849768	0.198279	0.424884
DOX	t14_16_	-2.426	0.199388	0.279143	0.598163
DOX	t4_14_	-6.97124	0.0515912	0.361139	0.361139
DOX	del_1p_	-0.635113	0.781252	0.781252	0.781252
DOX	del_13q_	-2.92303	0.339342	0.395899	0.678684
DOX	del_17p_	-2.7869	0.0952487	0.166685	0.380995
DOX	amp_dup_1q21_	-4.97742	0.0663373	0.23218	0.398024
ELEVENOSTAT	t11_14_	1.41411	0.976252	1.70844	3.90501
ELEVENOSTAT	t14_16_	NaN	NaN	NaN	NaN
ELEVENOSTAT	t4_14_	7.45724	0.428825	1.50089	2.57295
ELEVENOSTAT	del_1p_	NaN	NaN	NaN	NaN
ELEVENOSTAT	del_13q_	8.6482	0.293174	2.05222	2.05222
ELEVENOSTAT	del_17p_	-0.568116	0.827061	1.92981	4.13531
ELEVENOSTAT	amp_dup_1q21_	-2.49007	0.989711	1.3856	2.96913
EN460	t11_14_	NaN	NaN	NaN	NaN
EN460	t14_16_	NaN	NaN	NaN	NaN
EN460	t4_14_	NaN	NaN	NaN	NaN
EN460	del_1p_	-1.02222	0.651907	1.52112	3.25954
EN460	del_13q_	-3.36151	0.240933	1.68653	1.68653
EN460	del_17p_	NaN	NaN	NaN	NaN
EN460	amp_dup_1q21_	-1.61819	0.490166	1.71558	2.941
F8	t11_14_	NaN	NaN	NaN	NaN
F8	t14_16_	NaN	NaN	NaN	NaN
F8	t4_14_	-8.13002	0.546493	1.27515	2.73246
F8	del_1p_	NaN	NaN	NaN	NaN
F8	del_13q_	8.80877	0.290626	1.01719	1.74375
F8	del_17p_	-4.09977	0.791909	1.38584	3.16764
F8	amp_dup_1q21_	-8.27186	0.197706	1.38394	1.38394
FRAX597	t11_14_	-2.88235	0.854413	1.19618	2.56324
FRAX597	t14_16_	NaN	NaN	NaN	NaN
FRAX597	t4_14_	NaN	NaN	NaN	NaN
FRAX597	del_1p_	-1.34685	0.752455	1.3168	3.00982
FRAX597	del_13q_	4.31314	0.489333	1.71267	2.936
FRAX597	del_17p_	12.292	0.573304	1.33771	2.86652
FRAX597	amp_dup_1q21_	5.49606	0.303862	2.12704	2.12704
GDC-0980	t11_14_	NaN	NaN	NaN	NaN
GDC-0980	t14_16_	NaN	NaN	NaN	NaN
GDC-0980	t4_14_	-14.1135	0.467953	1.63784	2.80772
GDC-0980	del_1p_	16.4838	0.632806	1.10741	2.53122
GDC-0980	del_13q_	-30.9094	0.601574	1.40367	3.00787
GDC-0980	del_17p_	32.8961	0.264721	1.85305	1.85305
GDC-0980	amp_dup_1q21_	-15.1103	0.748705	1.04819	2.24611
I-BET-762	t11_14_	NaN	NaN	NaN	NaN
I-BET-762	t14_16_	NaN	NaN	NaN	NaN
I-BET-762	t4_14_	2.86571	0.742895	5.20026	5.20026
I-BET-762	del_1p_	NaN	NaN	NaN	NaN
I-BET-762	del_13q_	NaN	NaN	NaN	NaN
I-BET-762	del_17p_	NaN	NaN	NaN	NaN
I-BET-762	amp_dup_1q21_	1.96898	0.81956	2.86846	4.91736
IBRUTINIB	t11_14_	0.722192	0.382605	0.892745	1.91303
IBRUTINIB	t14_16_	NaN	NaN	NaN	NaN
IBRUTINIB	t4_14_	NaN	NaN	NaN	NaN
IBRUTINIB	del_1p_	NaN	NaN	NaN	NaN
IBRUTINIB	del_13q_	0.801044	0.198019	1.38613	1.38613
IBRUTINIB	del_17p_	NaN	NaN	NaN	NaN
IBRUTINIB	amp_dup_1q21_	-0.748593	0.247041	0.864643	1.48225
IDELALISIB	t11_14_	-2.02246	0.0427635	0.299344	0.299344
IDELALISIB	t14_16_	NaN	NaN	NaN	NaN
IDELALISIB	t4_14_	NaN	NaN	NaN	NaN
IDELALISIB	del_1p_	NaN	NaN	NaN	NaN
IDELALISIB	del_13q_	-0.836941	0.691818	1.61424	3.45909
IDELALISIB	del_17p_	NaN	NaN	NaN	NaN
IDELALISIB	amp_dup_1q21_	2.02246	0.0427635	0.149672	0.256581
INCB054329	t11_14_	10.4431	0.124775	0.873427	0.873427
INCB054329	t14_16_	-5.38307	0.528008	1.23202	2.64004
INCB054329	t4_14_	-2.72299	0.774156	1.08382	2.32247
INCB054329	del_1p_	NaN	NaN	NaN	NaN
INCB054329	del_13q_	5.82758	0.4466	1.5631	2.6796
INCB054329	del_17p_	1.23595	0.896485	1.0459	1.79297
INCB054329	amp_dup_1q21_	-8.21011	0.54847	0.959823	2.19388
INK128	t11_14_	3.06532	0.295033	0.516307	1.18013
INK128	t14_16_	-14.6752	0.0759938	0.531956	0.531956
INK128	t4_14_	3.53954	0.532632	0.621404	1.06526
INK128	del_1p_	0.877587	0.226306	0.528048	1.13153
INK128	del_13q_	2.96641	0.736536	0.736536	0.736536
INK128	del_17p_	-2.69022	0.451508	0.632111	1.35452
INK128	amp_dup_1q21_	-3.26542	0.105507	0.369273	0.63304
IXAZOMIB	t11_14_	8.37953	0.0188381	0.131867	0.131867
IXAZOMIB	t14_16_	-2.12915	0.838526	1.17394	2.51558
IXAZOMIB	t4_14_	-2.99491	0.954656	1.11377	1.90931
IXAZOMIB	del_1p_	-0.985544	0.196383	0.34367	0.785533
IXAZOMIB	del_13q_	0.452559	0.978214	0.978214	0.978214
IXAZOMIB	del_17p_	1.91312	0.162308	0.378719	0.81154
IXAZOMIB	amp_dup_1q21_	-4.81968	0.0438003	0.153301	0.262802
JNK-IN-8	t11_14_	1.7598	0.724499	1.6905	3.62249
JNK-IN-8	t14_16_	NaN	NaN	NaN	NaN
JNK-IN-8	t4_14_	-2.71942	0.994426	1.16016	1.98885
JNK-IN-8	del_1p_	7.87014	0.0612799	0.428959	0.428959
JNK-IN-8	del_13q_	-1.13088	0.869832	1.52221	3.47933
JNK-IN-8	del_17p_	4.09348	0.876603	1.22724	2.62981
JNK-IN-8	amp_dup_1q21_	-3.75413	0.26045	0.911577	1.5627
KPT	t11_14_	5.8795	0.0945106	0.165393	0.378042
KPT	t14_16_	1.4553	0.700941	0.700941	0.700941
KPT	t4_14_	10.4734	0.0354122	0.247885	0.247885
KPT	del_1p_	-14.498	0.0748013	0.174536	0.374006
KPT	del_13q_	0.455509	0.385829	0.450134	0.771658
KPT	del_17p_	-4.84301	0.167895	0.235053	0.503685
KPT	amp_dup_1q21_	-7.19633	0.0657099	0.229985	0.39426
LEN	t11_14_	3.66967	0.13194	0.923583	0.923583
LEN	t14_16_	-2.69648	0.350946	0.818874	1.75473
LEN	t4_14_	2.87842	0.664759	0.930662	1.99428
LEN	del_1p_	-1.51233	0.798179	0.798179	0.798179
LEN	del_13q_	4.40636	0.138994	0.48648	0.833966
LEN	del_17p_	0.606171	0.777224	0.906762	1.55445
LEN	amp_dup_1q21_	-1.25307	0.395847	0.692731	1.58339
LINIFANIB	t11_14_	4.9526	0.148964	0.521372	0.893781
LINIFANIB	t14_16_	NaN	NaN	NaN	NaN
LINIFANIB	t4_14_	NaN	NaN	NaN	NaN
LINIFANIB	del_1p_	NaN	NaN	NaN	NaN
LINIFANIB	del_13q_	4.04706	0.16589	0.387078	0.829452
LINIFANIB	del_17p_	NaN	NaN	NaN	NaN
LINIFANIB	amp_dup_1q21_	-5.74607	0.0513307	0.359315	0.359315
LOSMAPIMOD	t11_14_	1.10273	0.567937	0.99389	2.27175
LOSMAPIMOD	t14_16_	NaN	NaN	NaN	NaN
LOSMAPIMOD	t4_14_	-4.64949	0.46316	1.08071	2.3158
LOSMAPIMOD	del_1p_	2.20179	0.438876	1.53607	2.63326
LOSMAPIMOD	del_13q_	3.58712	0.22575	1.58025	1.58025
LOSMAPIMOD	del_17p_	3.86041	0.870999	1.01617	1.742
LOSMAPIMOD	amp_dup_1q21_	0.783187	0.580765	0.813071	1.74229
LY2603618	t11_14_	NaN	NaN	NaN	NaN
LY2603618	t14_16_	NaN	NaN	NaN	NaN
LY2603618	t4_14_	0.394707	0.986438	1.72627	3.94575
LY2603618	del_1p_	NaN	NaN	NaN	NaN
LY2603618	del_13q_	2.75621	0.352333	2.46633	2.46633
LY2603618	del_17p_	1.02058	0.689576	1.60901	3.44788
LY2603618	amp_dup_1q21_	-1.29543	0.597356	2.09075	3.58414
MA7-038	t11_14_	2.81127	0.434353	0.760118	1.73741
MA7-038	t14_16_	NaN	NaN	NaN	NaN
MA7-038	t4_14_	NaN	NaN	NaN	NaN
MA7-038	del_1p_	-3.33698	0.362776	1.26972	2.17665
MA7-038	del_13q_	3.4131	0.449902	0.629862	1.34971
MA7-038	del_17p_	-4.78727	0.0668606	0.468024	0.468024
MA7-038	amp_dup_1q21_	-0.707223	0.365577	0.853012	1.82788
MARK-INHIBITOR	t11_14_	-5.26331	0.235234	0.823318	1.4114
MARK-INHIBITOR	t14_16_	NaN	NaN	NaN	NaN
MARK-INHIBITOR	t4_14_	5.62523	0.17506	1.22542	1.22542
MARK-INHIBITOR	del_1p_	-2.11589	0.804877	0.939023	1.60975
MARK-INHIBITOR	del_13q_	5.0044	0.312753	0.729757	1.56376
MARK-INHIBITOR	del_17p_	4.41741	0.444275	0.777481	1.7771
MARK-INHIBITOR	amp_dup_1q21_	-3.96136	0.56886	0.796404	1.70658
MEL	t11_14_	1.23693	0.894056	0.894056	0.894056
MEL	t14_16_	-22.9015	0.0282968	0.198078	0.198078
MEL	t4_14_	-0.784698	0.245767	0.573457	1.22884
MEL	del_1p_	-14.6868	0.0718121	0.251342	0.430873
MEL	del_13q_	0.814969	0.785078	1.09911	2.35523
MEL	del_17p_	2.70071	0.878812	1.02528	1.75762
MEL	amp_dup_1q21_	-4.548	0.257622	0.450839	1.03049
MK2206	t11_14_	1.66056	0.563786	0.789301	1.69136
MK2206	t14_16_	-5.68032	0.387519	1.35632	2.32511
MK2206	t4_14_	6.21492	0.400736	0.935052	2.00368
MK2206	del_1p_	NaN	NaN	NaN	NaN
MK2206	del_13q_	1.00792	0.677002	0.789836	1.354
MK2206	del_17p_	-0.631738	0.310267	2.17187	2.17187
MK2206	amp_dup_1q21_	-0.631738	0.542326	0.949071	2.1693
MOMELOTINIB	t11_14_	18.7225	0.0382507	0.267755	0.267755
MOMELOTINIB	t14_16_	NaN	NaN	NaN	NaN
MOMELOTINIB	t4_14_	NaN	NaN	NaN	NaN
MOMELOTINIB	del_1p_	NaN	NaN	NaN	NaN
MOMELOTINIB	del_13q_	11.675	0.159408	0.371953	0.797041
MOMELOTINIB	del_17p_	NaN	NaN	NaN	NaN
MOMELOTINIB	amp_dup_1q21_	-18.8381	0.0529138	0.185198	0.317483
MOTESANIB	t11_14_	-0.579666	0.997991	1.39719	2.99397
MOTESANIB	t14_16_	NaN	NaN	NaN	NaN
MOTESANIB	t4_14_	-2.20293	0.42268	0.986253	2.1134
MOTESANIB	del_1p_	NaN	NaN	NaN	NaN
MOTESANIB	del_13q_	-1.2986	0.386558	2.70591	2.70591
MOTESANIB	del_17p_	0.7341	0.515263	0.901711	2.06105
MOTESANIB	amp_dup_1q21_	2.58793	0.404955	1.41734	2.42973
MTI101	t11_14_	-3.49604	0.651215	0.9117	1.95364
MTI101	t14_16_	6.10341	0.885389	0.885389	0.885389
MTI101	t4_14_	16.2049	0.876544	1.02263	1.75309
MTI101	del_1p_	14.3619	0.0727307	0.509115	0.509115
MTI101	del_13q_	10.6896	0.301949	1.05682	1.81169
MTI101	del_17p_	-3.69063	0.606912	1.0621	2.42765
MTI101	amp_dup_1q21_	3.67305	0.439834	1.02628	2.19917
MYC	t11_14_	NaN	NaN	NaN	NaN
MYC	t14_16_	NaN	NaN	NaN	NaN
MYC	t4_14_	NaN	NaN	NaN	NaN
MYC	del_1p_	NaN	NaN	NaN	NaN
MYC	del_13q_	NaN	NaN	NaN	NaN
MYC	del_17p_	NaN	NaN	NaN	NaN
MYC	amp_dup_1q21_	NaN	NaN	NaN	NaN
NICLOSAMIDE	t11_14_	-18.2309	0.0249197	0.174438	0.174438
NICLOSAMIDE	t14_16_	NaN	NaN	NaN	NaN
NICLOSAMIDE	t4_14_	8.07962	0.533184	1.86614	3.19911
NICLOSAMIDE	del_1p_	NaN	NaN	NaN	NaN
NICLOSAMIDE	del_13q_	NaN	NaN	NaN	NaN
NICLOSAMIDE	del_17p_	1.54888	0.909074	1.59088	3.63629
NICLOSAMIDE	amp_dup_1q21_	2.43743	0.672483	1.56913	3.36241
NU-7441	t11_14_	-5.41178	0.511422	1.78998	3.06853
NU-7441	t14_16_	NaN	NaN	NaN	NaN
NU-7441	t4_14_	2.75155	0.154748	1.08323	1.08323
NU-7441	del_1p_	-0.271931	0.529329	1.2351	2.64664
NU-7441	del_13q_	2.07146	0.934839	1.09065	1.86968
NU-7441	del_17p_	3.23301	0.745815	1.04414	2.23745
NU-7441	amp_dup_1q21_	0.135319	0.607337	1.06284	2.42935
OPR	t11_14_	2.38327	0.492962	3.45073	3.45073
OPR	t14_16_	NaN	NaN	NaN	NaN
OPR	t4_14_	4.20098	0.595473	2.08415	3.57284
OPR	del_1p_	NaN	NaN	NaN	NaN
OPR	del_13q_	-2.94162	0.751173	1.75274	3.75586
OPR	del_17p_	NaN	NaN	NaN	NaN
OPR	amp_dup_1q21_	-0.323477	0.933241	1.63317	3.73297
OTSSP167	t11_14_	NaN	NaN	NaN	NaN
OTSSP167	t14_16_	NaN	NaN	NaN	NaN
OTSSP167	t4_14_	-0.325118	0.97809	1.71166	3.91236
OTSSP167	del_1p_	NaN	NaN	NaN	NaN
OTSSP167	del_13q_	5.68463	0.93589	2.18374	4.67945
OTSSP167	del_17p_	7.7498	0.405491	1.41922	2.43295
OTSSP167	amp_dup_1q21_	-12.9503	0.0930813	0.651569	0.651569
PALBOCICLIB	t11_14_	7.9118	0.0673692	0.471585	0.471585
PALBOCICLIB	t14_16_	NaN	NaN	NaN	NaN
PALBOCICLIB	t4_14_	NaN	NaN	NaN	NaN
PALBOCICLIB	del_1p_	2.58773	0.437184	0.765073	1.74874
PALBOCICLIB	del_13q_	3.876	0.638061	0.893285	1.91418
PALBOCICLIB	del_17p_	3.24389	0.376501	0.878503	1.88251
PALBOCICLIB	amp_dup_1q21_	-3.70654	0.0833846	0.291846	0.500308
PANOBINOSTAT	t11_14_	6.03842	0.00113305	0.00396567	0.00679829
PANOBINOSTAT	t14_16_	-0.289105	0.536187	0.750661	1.60856
PANOBINOSTAT	t4_14_	0.289105	0.558763	0.65189	1.11753
PANOBINOSTAT	del_1p_	3.96195	0.8146	0.8146	0.8146
PANOBINOSTAT	del_13q_	2.35112	0.17598	0.307965	0.703921
PANOBINOSTAT	del_17p_	-2.58207	0.168621	0.393448	0.843104
PANOBINOSTAT	amp_dup_1q21_	-8.32393	1.45416e-05	0.000101791	0.000101791
POM	t11_14_	2.58066	0.0253352	0.0591156	0.126676
POM	t14_16_	-8.81635	0.00226703	0.0158692	0.0158692
POM	t4_14_	-1.20759	0.650345	0.758736	1.30069
POM	del_1p_	-0.310957	0.861555	0.861555	0.861555
POM	del_13q_	2.31063	0.0424287	0.0594002	0.127286
POM	del_17p_	-0.685686	0.0295104	0.0516431	0.118041
POM	amp_dup_1q21_	-1.83642	0.0213818	0.0748362	0.128291
PONATINIB	t11_14_	5.21651	0.431733	1.00738	2.15867
PONATINIB	t14_16_	1.68091	0.757847	1.32623	3.03139
PONATINIB	t4_14_	-12.0418	0.185668	1.29968	1.29968
PONATINIB	del_1p_	NaN	NaN	NaN	NaN
PONATINIB	del_13q_	1.54742	0.860593	1.20483	2.58178
PONATINIB	del_17p_	1.54742	0.987774	1.1524	1.97555
PONATINIB	amp_dup_1q21_	-9.29809	0.230751	0.807628	1.3845
PYRVINIUM	t11_14_	2.49253	0.139967	0.489885	0.839802
PYRVINIUM	t14_16_	NaN	NaN	NaN	NaN
PYRVINIUM	t4_14_	-0.831206	0.534985	0.748979	1.60495
PYRVINIUM	del_1p_	-6.94999	0.532376	0.931659	2.12951
PYRVINIUM	del_13q_	-1.42175	0.89397	1.04296	1.78794
PYRVINIUM	del_17p_	-16.1252	0.0575383	0.402768	0.402768
PYRVINIUM	amp_dup_1q21_	-2.75832	0.33422	0.779846	1.6711
QST	t11_14_	NaN	NaN	NaN	NaN
QST	t14_16_	NaN	NaN	NaN	NaN
QST	t4_14_	NaN	NaN	NaN	NaN
QST	del_1p_	NaN	NaN	NaN	NaN
QST	del_13q_	NaN	NaN	NaN	NaN
QST	del_17p_	NaN	NaN	NaN	NaN
QST	amp_dup_1q21_	NaN	NaN	NaN	NaN
R406	t11_14_	-9.21769	0.512018	1.19471	2.56009
R406	t14_16_	NaN	NaN	NaN	NaN
R406	t4_14_	3.48913	0.390022	1.36508	2.34013
R406	del_1p_	0.0528755	0.731385	0.853282	1.46277
R406	del_13q_	15.8665	0.072964	0.510748	0.510748
R406	del_17p_	-1.78077	0.662114	0.92696	1.98634
R406	amp_dup_1q21_	0.722154	0.640742	1.1213	2.56297
RALIMETINIB	t11_14_	-0.474429	0.177808	1.24465	1.24465
RALIMETINIB	t14_16_	NaN	NaN	NaN	NaN
RALIMETINIB	t4_14_	NaN	NaN	NaN	NaN
RALIMETINIB	del_1p_	NaN	NaN	NaN	NaN
RALIMETINIB	del_13q_	-0.474429	0.177808	0.622327	1.06685
RALIMETINIB	del_17p_	NaN	NaN	NaN	NaN
RALIMETINIB	amp_dup_1q21_	0.474429	0.177808	0.414885	0.889039
RICOLINOSTAT	t11_14_	2.02155	0.726244	1.27093	2.90497
RICOLINOSTAT	t14_16_	1.4824	0.306774	2.14742	2.14742
RICOLINOSTAT	t4_14_	-0.670888	0.956984	1.33978	2.87095
RICOLINOSTAT	del_1p_	NaN	NaN	NaN	NaN
RICOLINOSTAT	del_13q_	2.03011	0.431063	1.50872	2.58638
RICOLINOSTAT	del_17p_	0.0954954	0.984372	1.14843	1.96874
RICOLINOSTAT	amp_dup_1q21_	-0.748358	0.626566	1.46199	3.13283
RUXOLITINIB	t11_14_	4.04758	0.406354	1.42224	2.43812
RUXOLITINIB	t14_16_	NaN	NaN	NaN	NaN
RUXOLITINIB	t4_14_	NaN	NaN	NaN	NaN
RUXOLITINIB	del_1p_	-20.091	0.0368724	0.258107	0.258107
RUXOLITINIB	del_13q_	-3.7807	0.629873	0.881822	1.88962
RUXOLITINIB	del_17p_	3.97418	0.48017	0.840297	1.92068
RUXOLITINIB	amp_dup_1q21_	-2.90407	0.455154	1.06203	2.27577
SELUMETINIB	t11_14_	4.68412	0.199201	0.697204	1.19521
SELUMETINIB	t14_16_	NaN	NaN	NaN	NaN
SELUMETINIB	t4_14_	NaN	NaN	NaN	NaN
SELUMETINIB	del_1p_	NaN	NaN	NaN	NaN
SELUMETINIB	del_13q_	-1.45258	0.9477	2.2113	4.7385
SELUMETINIB	del_17p_	NaN	NaN	NaN	NaN
SELUMETINIB	amp_dup_1q21_	-6.76125	0.0637964	0.446575	0.446575
SILMITASERTIB	t11_14_	5.42856	0.357645	0.62588	1.43058
SILMITASERTIB	t14_16_	-6.19031	0.755405	0.881306	1.51081
SILMITASERTIB	t4_14_	-20.6063	0.00585473	0.0409831	0.0409831
SILMITASERTIB	del_1p_	-1.3521	0.551936	0.77271	1.65581
SILMITASERTIB	del_13q_	0.19827	0.273224	0.637524	1.36612
SILMITASERTIB	del_17p_	5.42856	0.270088	0.945309	1.62053
SILMITASERTIB	amp_dup_1q21_	-0.600106	0.952548	0.952548	0.952548
SNS-032	t11_14_	-0.564562	0.739853	0.863162	1.47971
SNS-032	t14_16_	-8.74445	0.274564	0.64065	1.37282
SNS-032	t4_14_	-9.46622	0.420031	0.735054	1.68012
SNS-032	del_1p_	-4.50191	0.198441	0.694544	1.19065
SNS-032	del_13q_	3.05064	0.15008	1.05056	1.05056
SNS-032	del_17p_	0.564562	0.57008	0.798112	1.71024
SNS-032	amp_dup_1q21_	-1.0165	0.800821	0.800821	0.800821
TAI-1	t11_14_	-2.91166	0.741451	0.865026	1.4829
TAI-1	t14_16_	NaN	NaN	NaN	NaN
TAI-1	t4_14_	-5.45763	0.083425	0.583975	0.583975
TAI-1	del_1p_	3.79727	0.336295	0.588516	1.34518
TAI-1	del_13q_	-5.92987	0.346298	0.484818	1.0389
TAI-1	del_17p_	-10.1281	0.300778	1.05272	1.80467
TAI-1	amp_dup_1q21_	-1.7504	0.319476	0.745443	1.59738
THZ1	t11_14_	3.51042	0.308969	0.720928	1.54485
THZ1	t14_16_	-2.60425	0.470876	0.824033	1.88351
THZ1	t4_14_	-13.9702	0.0969919	0.678944	0.678944
THZ1	del_1p_	-5.31185	0.727332	0.848554	1.45466
THZ1	del_13q_	-1.12222	0.985038	0.985038	0.985038
THZ1	del_17p_	-3.04827	0.561812	0.786537	1.68544
THZ1	amp_dup_1q21_	-5.63391	0.124931	0.437259	0.749588
TOZASERTIB	t11_14_	5.2907	0.183948	0.643818	1.10369
TOZASERTIB	t14_16_	NaN	NaN	NaN	NaN
TOZASERTIB	t4_14_	NaN	NaN	NaN	NaN
TOZASERTIB	del_1p_	NaN	NaN	NaN	NaN
TOZASERTIB	del_13q_	-4.4998	0.169669	1.18768	1.18768
TOZASERTIB	del_17p_	NaN	NaN	NaN	NaN
TOZASERTIB	amp_dup_1q21_	-4.69335	0.563781	1.31549	2.81891
TRAMETINIB	t11_14_	7.66901	0.217771	1.5244	1.5244
TRAMETINIB	t14_16_	NaN	NaN	NaN	NaN
TRAMETINIB	t4_14_	NaN	NaN	NaN	NaN
TRAMETINIB	del_1p_	NaN	NaN	NaN	NaN
TRAMETINIB	del_13q_	-5.45009	0.348074	1.21826	2.08844
TRAMETINIB	del_17p_	NaN	NaN	NaN	NaN
TRAMETINIB	amp_dup_1q21_	-4.5789	0.377773	0.88147	1.88887
UMI-77	t11_14_	-0.168672	0.981437	1.14501	1.96287
UMI-77	t14_16_	1.38075	0.490586	1.71705	2.94352
UMI-77	t4_14_	-8.80225	0.494719	1.15434	2.47359
UMI-77	del_1p_	NaN	NaN	NaN	NaN
UMI-77	del_13q_	7.73762	0.0493563	0.345494	0.345494
UMI-77	del_17p_	0.912711	0.848883	1.48554	3.39553
UMI-77	amp_dup_1q21_	4.10587	0.951716	1.3324	2.85515
VEMURAFENIB	t11_14_	0	0.54147	1.89514	3.24882
VEMURAFENIB	t14_16_	NaN	NaN	NaN	NaN
VEMURAFENIB	t4_14_	NaN	NaN	NaN	NaN
VEMURAFENIB	del_1p_	NaN	NaN	NaN	NaN
VEMURAFENIB	del_13q_	-0.00515766	0.177808	1.24465	1.24465
VEMURAFENIB	del_17p_	NaN	NaN	NaN	NaN
VEMURAFENIB	amp_dup_1q21_	0	0.54147	1.26343	2.70735

## Sheet: Cytogenetics_LD50_LD20
DrugName	Cytogenetic_Abnormality	LD50_log2_Fold_Change	LD50_Nominal_p_value	LD20_log2_Fold_Change	LD20_Nominal_p_value	LD50_FDR_q_value	LD50_FWER_q_value	LD20_FDR_q_value	LD20_FWER_q_value
A-1210477	t11_14_	-0.416518	NaN	-1.95693	0.256485	NaN	NaN	0.897696	1.53891
A-1210477	t14_16_	NaN	NaN	NaN	NaN	NaN	NaN	NaN	NaN
A-1210477	t4_14_	0.416518	NaN	-1.04228	0.566427	NaN	NaN	0.991248	2.26571
A-1210477	del_1p_	NaN	NaN	NaN	NaN	NaN	NaN	NaN	NaN
A-1210477	del_13q_	0.416518	NaN	1.9021	0.137915	NaN	NaN	0.965402	0.965402
A-1210477	del_17p_	NaN	NaN	-0.356567	0.710352	NaN	NaN	0.994493	2.13106
A-1210477	amp_dup_1q21_	0.416518	NaN	0.0718895	0.526744	NaN	NaN	1.22907	2.63372
ABBVIE1	t11_14_	NaN	NaN	-4.2451	0.0494038	NaN	NaN	0.115275	0.247019
ABBVIE1	t14_16_	NaN	NaN	NaN	NaN	NaN	NaN	NaN	NaN
ABBVIE1	t4_14_	NaN	NaN	NaN	NaN	NaN	NaN	NaN	NaN
ABBVIE1	del_1p_	NaN	NaN	-4.06379	0.44884	NaN	NaN	0.78547	1.79536
ABBVIE1	del_13q_	NaN	NaN	0.545413	0.820517	NaN	NaN	1.14872	2.46155
ABBVIE1	del_17p_	NaN	NaN	2.71419	0.0432676	NaN	NaN	0.151437	0.259606
ABBVIE1	amp_dup_1q21_	NaN	NaN	2.7928	0.0180984	NaN	NaN	0.126689	0.126689
ABT-199	t11_14_	-1.3836	0.122855	-3.53159	0.57599	0.859988	0.859988	0.806387	1.72797
ABT-199	t14_16_	NaN	NaN	3.38865	0.131801	NaN	NaN	0.461304	0.790807
ABT-199	t4_14_	NaN	NaN	4.01907	0.00990914	NaN	NaN	0.069364	0.069364
ABT-199	del_1p_	0.0684411	0.915479	-1.96742	0.141765	1.28167	2.74644	0.330785	0.708825
ABT-199	del_13q_	0.310568	0.77221	-1.33424	0.925949	1.80182	3.86105	0.925949	0.925949
ABT-199	del_17p_	-0.0403175	0.8759	2.20392	0.266432	1.53282	3.5036	0.466256	1.06573
ABT-199	amp_dup_1q21_	1.27534	0.178272	3.56876	0.673846	0.623952	1.06963	0.786153	1.34769
ADAVOSERTIB	t11_14_	NaN	NaN	NaN	NaN	NaN	NaN	NaN	NaN
ADAVOSERTIB	t14_16_	NaN	NaN	NaN	NaN	NaN	NaN	NaN	NaN
ADAVOSERTIB	t4_14_	NaN	NaN	-0.432464	0.665616	NaN	NaN	1.5531	3.32808
ADAVOSERTIB	del_1p_	NaN	NaN	NaN	NaN	NaN	NaN	NaN	NaN
ADAVOSERTIB	del_13q_	NaN	NaN	-5.68229	0.424232	NaN	NaN	2.96962	2.96962
ADAVOSERTIB	del_17p_	NaN	NaN	-0.534997	0.664845	NaN	NaN	2.32696	3.98907
ADAVOSERTIB	amp_dup_1q21_	NaN	NaN	-0.432464	0.669544	NaN	NaN	1.1717	2.67818
ALISERTIB	t11_14_	NaN	NaN	0.253936	0.777493	NaN	NaN	5.44245	5.44245
ALISERTIB	t14_16_	NaN	NaN	NaN	NaN	NaN	NaN	NaN	NaN
ALISERTIB	t4_14_	NaN	NaN	NaN	NaN	NaN	NaN	NaN	NaN
ALISERTIB	del_1p_	NaN	NaN	NaN	NaN	NaN	NaN	NaN	NaN
ALISERTIB	del_13q_	NaN	NaN	-0.194131	0.99119	NaN	NaN	1.73458	3.96476
ALISERTIB	del_17p_	NaN	NaN	-0.253936	0.900554	NaN	NaN	2.10129	4.50277
ALISERTIB	amp_dup_1q21_	NaN	NaN	-0.253936	0.777493	NaN	NaN	2.72123	4.66496
AZ-628	t11_14_	NaN	NaN	NaN	NaN	NaN	NaN	NaN	NaN
AZ-628	t14_16_	NaN	NaN	NaN	NaN	NaN	NaN	NaN	NaN
AZ-628	t4_14_	0.760734	0.508674	-1.85754	0.337912	3.56072	3.56072	1.18269	2.02747
AZ-628	del_1p_	NaN	NaN	NaN	NaN	NaN	NaN	NaN	NaN
AZ-628	del_13q_	NaN	NaN	NaN	NaN	NaN	NaN	NaN	NaN
AZ-628	del_17p_	NaN	NaN	NaN	NaN	NaN	NaN	NaN	NaN
AZ-628	amp_dup_1q21_	0.760734	0.508674	2.41774	0.302343	1.78036	3.05204	2.1164	2.1164
AZD1480	t11_14_	NaN	NaN	1.04318	0.689896	NaN	NaN	2.41464	4.13938
AZD1480	t14_16_	NaN	NaN	NaN	NaN	NaN	NaN	NaN	NaN
AZD1480	t4_14_	NaN	NaN	NaN	NaN	NaN	NaN	NaN	NaN
AZD1480	del_1p_	NaN	NaN	NaN	NaN	NaN	NaN	NaN	NaN
AZD1480	del_13q_	-0.116491	0.958003	-0.875574	0.398328	6.70602	6.70602	2.7883	2.7883
AZD1480	del_17p_	NaN	NaN	NaN	NaN	NaN	NaN	NaN	NaN
AZD1480	amp_dup_1q21_	NaN	NaN	-0.468513	0.920659	NaN	NaN	2.14821	4.6033
AZD7762	t11_14_	NaN	NaN	NaN	NaN	NaN	NaN	NaN	NaN
AZD7762	t14_16_	NaN	NaN	NaN	NaN	NaN	NaN	NaN	NaN
AZD7762	t4_14_	-1.73081	0.422654	-0.731536	0.582058	0.986192	2.11327	1.0186	2.32823
AZD7762	del_1p_	NaN	NaN	NaN	NaN	NaN	NaN	NaN	NaN
AZD7762	del_13q_	0.199713	0.879405	1.4724	0.397865	1.53896	3.51762	0.928353	1.98933
AZD7762	del_17p_	-2.98089	0.222738	2.17488	0.295465	1.55916	1.55916	1.03413	1.77279
AZD7762	amp_dup_1q21_	-1.17543	0.352408	-2.59586	0.226563	1.23343	2.11445	1.58594	1.58594
BI2536	t11_14_	-0.0650061	0.491763	1.59428	0.0834265	1.14745	2.45881	0.583985	0.583985
BI2536	t14_16_	0.935091	0.129763	-2.88667	0.270718	0.908344	0.908344	0.631675	1.35359
BI2536	t4_14_	-0.0198448	0.54779	-2.34336	0.298596	0.958633	2.19116	0.522542	1.19438
BI2536	del_1p_	-0.160805	0.163189	-4.40127	0.433684	0.571162	0.979134	0.607158	1.30105
BI2536	del_13q_	0.0650061	0.698684	-1.361	0.785616	0.815132	1.39737	0.785616	0.785616
BI2536	del_17p_	-0.113529	0.915984	-2.62567	0.613778	0.915984	0.915984	0.716074	1.22756
BI2536	amp_dup_1q21_	-0.0079052	0.600694	-2.40434	0.217777	0.840971	1.80208	0.76222	1.30666
BMS754807	t11_14_	0.518674	0.310807	4.71062	0.147077	2.17565	2.17565	1.02954	1.02954
BMS754807	t14_16_	NaN	NaN	NaN	NaN	NaN	NaN	NaN	NaN
BMS754807	t4_14_	NaN	NaN	NaN	NaN	NaN	NaN	NaN	NaN
BMS754807	del_1p_	NaN	NaN	NaN	NaN	NaN	NaN	NaN	NaN
BMS754807	del_13q_	0.419493	0.624415	-0.746271	0.555095	1.45697	3.12207	1.29522	2.77547
BMS754807	del_17p_	NaN	NaN	NaN	NaN	NaN	NaN	NaN	NaN
BMS754807	amp_dup_1q21_	-0.559311	0.322558	-1.8965	0.442309	1.12895	1.93535	1.54808	2.65385
BMS777607	t11_14_	NaN	NaN	NaN	NaN	NaN	NaN	NaN	NaN
BMS777607	t14_16_	NaN	NaN	NaN	NaN	NaN	NaN	NaN	NaN
BMS777607	t4_14_	NaN	NaN	NaN	NaN	NaN	NaN	NaN	NaN
BMS777607	del_1p_	NaN	NaN	NaN	NaN	NaN	NaN	NaN	NaN
BMS777607	del_13q_	NaN	NaN	NaN	NaN	NaN	NaN	NaN	NaN
BMS777607	del_17p_	NaN	NaN	NaN	NaN	NaN	NaN	NaN	NaN
BMS777607	amp_dup_1q21_	NaN	NaN	NaN	NaN	NaN	NaN	NaN	NaN
BTZ	t11_14_	0.703484	0.00258167	0.676848	0.00236373	0.0180717	0.0180717	0.0165461	0.0165461
BTZ	t14_16_	-0.545885	0.389778	-0.234629	0.895509	0.454741	0.779556	0.895509	0.895509
BTZ	t4_14_	-0.103401	0.366133	-0.0457318	0.530499	0.512587	1.0984	0.928372	2.12199
BTZ	del_1p_	-0.499074	0.119305	-0.24893	0.194879	0.208783	0.477219	0.454717	0.974393
BTZ	del_13q_	-0.120736	0.0834465	-0.277839	0.869417	0.194709	0.417233	1.01432	1.73883
BTZ	del_17p_	-0.104542	0.972666	-0.21158	0.560219	0.972666	0.972666	0.784307	1.68066
BTZ	amp_dup_1q21_	-0.484428	0.0251728	-0.410264	0.0917827	0.0881048	0.151037	0.32124	0.550696
CFZ	t11_14_	0.321328	0.0119147	0.524274	0.0538421	0.0834029	0.0834029	0.376894	0.376894
CFZ	t14_16_	0.810018	0.688028	0.852633	0.892305	0.963239	2.06408	0.892305	0.892305
CFZ	t4_14_	0.393888	0.80937	0.786808	0.641274	0.944264	1.61874	1.12223	2.5651
CFZ	del_1p_	-0.790692	0.538602	-0.842061	0.842097	0.942554	2.15441	0.982446	1.68419
CFZ	del_13q_	0.335542	0.814884	0.00847248	0.689151	0.814884	0.814884	0.964812	2.06745
CFZ	del_17p_	-0.0774693	0.218593	0.065638	0.216582	0.510051	1.09297	0.758038	1.29949
CFZ	amp_dup_1q21_	-0.288151	0.0722743	0.0352037	0.383535	0.25296	0.433646	0.894914	1.91767
CGP-60474	t11_14_	NaN	NaN	NaN	NaN	NaN	NaN	NaN	NaN
CGP-60474	t14_16_	NaN	NaN	NaN	NaN	NaN	NaN	NaN	NaN
CGP-60474	t4_14_	-0.105316	0.202728	-0.105377	0.201818	0.709549	1.21637	0.706361	1.21091
CGP-60474	del_1p_	NaN	NaN	NaN	NaN	NaN	NaN	NaN	NaN
CGP-60474	del_13q_	NaN	NaN	NaN	NaN	NaN	NaN	NaN	NaN
CGP-60474	del_17p_	NaN	NaN	NaN	NaN	NaN	NaN	NaN	NaN
CGP-60474	amp_dup_1q21_	-0.184116	0.0693964	-0.183926	0.0694059	0.485775	0.485775	0.485841	0.485841
CPD22	t11_14_	-0.120798	0.612573	-0.2511	0.529992	2.144	3.67544	1.85497	3.17995
CPD22	t14_16_	NaN	NaN	NaN	NaN	NaN	NaN	NaN	NaN
CPD22	t4_14_	-0.733285	0.742054	-0.683925	0.496865	1.2986	2.96822	3.47806	3.47806
CPD22	del_1p_	-0.153876	0.840212	0.257464	0.849094	1.1763	2.52064	0.990609	1.69819
CPD22	del_13q_	0.0958158	0.481694	-0.13397	0.641188	3.37186	3.37186	0.897663	1.92356
CPD22	del_17p_	0.250808	0.670263	0.0527331	0.533127	1.56395	3.35132	1.24396	2.66563
CPD22	amp_dup_1q21_	-0.185032	0.942679	-0.13397	0.567679	1.09979	1.88536	0.993437	2.27071
CRIZOTINIB	t11_14_	0.280511	0.771139	0.644169	0.0640663	0.899662	1.54228	0.224232	0.384398
CRIZOTINIB	t14_16_	-0.985353	0.0530562	-1.95645	0.0415677	0.371394	0.371394	0.290974	0.290974
CRIZOTINIB	t4_14_	-0.130894	0.695697	-0.307759	0.639596	1.21747	2.78279	1.11929	2.55838
CRIZOTINIB	del_1p_	NaN	NaN	NaN	NaN	NaN	NaN	NaN	NaN
CRIZOTINIB	del_13q_	-0.0963845	0.589572	-0.244664	0.847521	1.37567	2.94786	0.988775	1.69504
CRIZOTINIB	del_17p_	-0.297297	0.307695	-0.49166	0.413283	1.07693	1.84617	0.964326	2.06641
CRIZOTINIB	amp_dup_1q21_	0.0768057	0.734999	-0.1427	0.688017	1.029	2.205	0.963223	2.06405
DABRAFENIB	t11_14_	NaN	NaN	NaN	NaN	NaN	NaN	NaN	NaN
DABRAFENIB	t14_16_	NaN	NaN	NaN	NaN	NaN	NaN	NaN	NaN
DABRAFENIB	t4_14_	NaN	NaN	NaN	NaN	NaN	NaN	NaN	NaN
DABRAFENIB	del_1p_	NaN	NaN	NaN	NaN	NaN	NaN	NaN	NaN
DABRAFENIB	del_13q_	NaN	NaN	NaN	NaN	NaN	NaN	NaN	NaN
DABRAFENIB	del_17p_	NaN	NaN	NaN	NaN	NaN	NaN	NaN	NaN
DABRAFENIB	amp_dup_1q21_	NaN	NaN	NaN	NaN	NaN	NaN	NaN	NaN
DARATUMUMAB	t11_14_	NaN	NaN	NaN	NaN	NaN	NaN	NaN	NaN
DARATUMUMAB	t14_16_	NaN	NaN	NaN	NaN	NaN	NaN	NaN	NaN
DARATUMUMAB	t4_14_	NaN	NaN	NaN	NaN	NaN	NaN	NaN	NaN
DARATUMUMAB	del_1p_	NaN	NaN	NaN	NaN	NaN	NaN	NaN	NaN
DARATUMUMAB	del_13q_	NaN	NaN	-1.24443	0.432911	NaN	NaN	1.51519	2.59747
DARATUMUMAB	del_17p_	NaN	NaN	-1.24443	0.669183	NaN	NaN	1.56143	3.34591
DARATUMUMAB	amp_dup_1q21_	NaN	NaN	6.67369	0.136345	NaN	NaN	0.954416	0.954416
DASATINIB	t11_14_	NaN	NaN	0.752401	0.634588	NaN	NaN	1.4807	3.17294
DASATINIB	t14_16_	NaN	NaN	NaN	NaN	NaN	NaN	NaN	NaN
DASATINIB	t4_14_	NaN	NaN	NaN	NaN	NaN	NaN	NaN	NaN
DASATINIB	del_1p_	NaN	NaN	NaN	NaN	NaN	NaN	NaN	NaN
DASATINIB	del_13q_	NaN	NaN	1.23296	0.239407	NaN	NaN	0.837926	1.43644
DASATINIB	del_17p_	NaN	NaN	NaN	NaN	NaN	NaN	NaN	NaN
DASATINIB	amp_dup_1q21_	NaN	NaN	-2.4138	0.183485	NaN	NaN	1.28439	1.28439
DEX	t11_14_	4.08999	0.0164363	-0.11824	0.449163	0.115054	0.115054	1.57207	2.69498
DEX	t14_16_	2.07294	0.269401	-0.327781	0.567096	0.628603	1.34701	1.32322	2.83548
DEX	t4_14_	-3.00289	0.405854	0.0173775	0.753683	0.710244	1.62342	0.879297	1.50737
DEX	del_1p_	NaN	NaN	-0.049106	0.714303	NaN	NaN	1.25003	2.85721
DEX	del_13q_	-3.72242	0.155108	0.217153	0.33871	0.542877	0.930646	2.37097	2.37097
DEX	del_17p_	-5.26805	0.611035	0.157704	0.748002	0.712874	1.22207	1.0472	2.24401
DEX	amp_dup_1q21_	-0.452313	0.592577	-0.179515	0.864467	0.829608	1.77773	0.864467	0.864467
DINACICLIB	t11_14_	1.29527	0.11971	1.19493	0.0362285	0.418983	0.718257	0.253599	0.253599
DINACICLIB	t14_16_	1.82443	0.41268	0.987372	0.858779	0.722189	1.65072	0.858779	0.858779
DINACICLIB	t4_14_	-0.300233	0.282672	0.137513	0.571717	0.659568	1.41336	1.0005	2.28687
DINACICLIB	del_1p_	0.313891	0.989038	-1.06127	0.536718	1.15388	1.97808	1.25234	2.68359
DINACICLIB	del_13q_	-1.84884	0.0427087	-1.1436	0.657685	0.298961	0.298961	0.920758	1.97305
DINACICLIB	del_17p_	0.101445	0.643265	0.211693	0.0741313	0.900571	1.9298	0.25946	0.444788
DINACICLIB	amp_dup_1q21_	-0.133856	0.996982	-0.200898	0.843073	0.996982	0.996982	0.983585	1.68615
DOVITINIB	t11_14_	NaN	NaN	NaN	NaN	NaN	NaN	NaN	NaN
DOVITINIB	t14_16_	NaN	NaN	NaN	NaN	NaN	NaN	NaN	NaN
DOVITINIB	t4_14_	-0.164811	0.79761	1.31189	0.636962	2.79163	4.78566	2.22937	3.82177
DOVITINIB	del_1p_	NaN	NaN	NaN	NaN	NaN	NaN	NaN	NaN
DOVITINIB	del_13q_	NaN	NaN	NaN	NaN	NaN	NaN	NaN	NaN
DOVITINIB	del_17p_	NaN	NaN	NaN	NaN	NaN	NaN	NaN	NaN
DOVITINIB	amp_dup_1q21_	0.677334	0.239925	2.22822	0.184072	1.67948	1.67948	1.28851	1.28851
DOX	t11_14_	0.446619	0.711508	0.92155	0.460349	0.711508	0.711508	1.07415	2.30174
DOX	t14_16_	-0.671143	0.364099	-1.3408	0.0762039	0.637173	1.4564	0.533427	0.533427
DOX	t4_14_	-0.397181	0.625019	-0.470243	0.617351	0.875027	1.87506	1.08036	2.4694
DOX	del_1p_	-0.145479	0.111061	-0.737459	0.861293	0.777425	0.777425	0.861293	0.861293
DOX	del_13q_	0.074166	0.347892	0.193023	0.686316	0.811748	1.73946	0.960842	2.05895
DOX	del_17p_	0.0370562	0.201833	-0.564444	0.0957861	0.706416	1.211	0.335251	0.574717
DOX	amp_dup_1q21_	-0.202709	0.666156	-0.356962	0.860165	0.777182	1.33231	1.00353	1.72033
ELEVENOSTAT	t11_14_	-0.407343	0.908841	-0.321632	0.639468	1.59047	3.63536	1.49209	3.19734
ELEVENOSTAT	t14_16_	NaN	NaN	NaN	NaN	NaN	NaN	NaN	NaN
ELEVENOSTAT	t4_14_	0.928447	0.507745	1.13057	0.348003	1.77711	3.04647	2.43602	2.43602
ELEVENOSTAT	del_1p_	NaN	NaN	NaN	NaN	NaN	NaN	NaN	NaN
ELEVENOSTAT	del_13q_	0.634005	0.968705	0.420536	0.667748	1.35619	2.90612	1.16856	2.67099
ELEVENOSTAT	del_17p_	-0.530086	0.331471	0.0168923	0.566891	2.3203	2.3203	1.98412	3.40135
ELEVENOSTAT	amp_dup_1q21_	-0.0512253	0.870007	0.443777	0.677159	2.03002	4.35004	0.948022	2.03148
EN460	t11_14_	NaN	NaN	NaN	NaN	NaN	NaN	NaN	NaN
EN460	t14_16_	NaN	NaN	NaN	NaN	NaN	NaN	NaN	NaN
EN460	t4_14_	NaN	NaN	NaN	NaN	NaN	NaN	NaN	NaN
EN460	del_1p_	NaN	NaN	NaN	NaN	NaN	NaN	NaN	NaN
EN460	del_13q_	NaN	NaN	NaN	NaN	NaN	NaN	NaN	NaN
EN460	del_17p_	NaN	NaN	NaN	NaN	NaN	NaN	NaN	NaN
EN460	amp_dup_1q21_	NaN	NaN	NaN	NaN	NaN	NaN	NaN	NaN
F8	t11_14_	NaN	NaN	NaN	NaN	NaN	NaN	NaN	NaN
F8	t14_16_	NaN	NaN	NaN	NaN	NaN	NaN	NaN	NaN
F8	t4_14_	0.0261975	0.920015	-1.11799	0.556735	1.61003	3.68006	1.94857	3.34041
F8	del_1p_	NaN	NaN	NaN	NaN	NaN	NaN	NaN	NaN
F8	del_13q_	0.686668	0.154619	2.72745	0.167299	1.08233	1.08233	1.17109	1.17109
F8	del_17p_	-0.170627	0.753156	0.642495	0.994929	1.75736	3.76578	1.74112	3.97971
F8	amp_dup_1q21_	-0.39755	0.171762	-2.12978	0.604682	0.601166	1.03057	1.41092	3.02341
FRAX597	t11_14_	-0.147488	0.413511	2.18902	0.164479	0.964858	2.06755	0.575676	0.986873
FRAX597	t14_16_	NaN	NaN	NaN	NaN	NaN	NaN	NaN	NaN
FRAX597	t4_14_	NaN	NaN	NaN	NaN	NaN	NaN	NaN	NaN
FRAX597	del_1p_	0.192011	0.8185	-1.95862	0.103131	1.1459	2.4555	0.721915	0.721915
FRAX597	del_13q_	0.147488	0.394343	-0.535533	0.667567	1.3802	2.36606	0.934593	2.0027
FRAX597	del_17p_	0.485427	0.27144	2.03008	0.2781	1.90008	1.90008	0.648899	1.3905
FRAX597	amp_dup_1q21_	0.222762	0.577266	-1.63322	0.511801	1.01022	2.30906	0.895652	2.0472
GDC-0980	t11_14_	NaN	NaN	NaN	NaN	NaN	NaN	NaN	NaN
GDC-0980	t14_16_	NaN	NaN	NaN	NaN	NaN	NaN	NaN	NaN
GDC-0980	t4_14_	0.204328	0.748405	0.633746	0.063983	1.04777	2.24522	0.447881	0.447881
GDC-0980	del_1p_	-1.83864	0.384872	-0.13037	0.642128	1.34705	2.30923	0.898979	1.92638
GDC-0980	del_13q_	1.54913	0.468605	-0.0441471	0.637133	1.09341	2.34302	1.11498	2.54853
GDC-0980	del_17p_	1.66395	0.368001	-0.30031	0.442301	2.57601	2.57601	1.54805	2.6538
GDC-0980	amp_dup_1q21_	0.247069	0.730273	0.00141875	0.58276	1.27798	2.92109	1.35977	2.9138
I-BET-762	t11_14_	NaN	NaN	NaN	NaN	NaN	NaN	NaN	NaN
I-BET-762	t14_16_	NaN	NaN	NaN	NaN	NaN	NaN	NaN	NaN
I-BET-762	t4_14_	0.311274	0.626279	0.677366	0.570297	2.19198	3.75768	1.99604	3.42178
I-BET-762	del_1p_	NaN	NaN	NaN	NaN	NaN	NaN	NaN	NaN
I-BET-762	del_13q_	NaN	NaN	NaN	NaN	NaN	NaN	NaN	NaN
I-BET-762	del_17p_	NaN	NaN	NaN	NaN	NaN	NaN	NaN	NaN
I-BET-762	amp_dup_1q21_	-0.437776	0.481476	0.975569	0.429037	3.37033	3.37033	3.00326	3.00326
IBRUTINIB	t11_14_	NaN	NaN	NaN	NaN	NaN	NaN	NaN	NaN
IBRUTINIB	t14_16_	NaN	NaN	NaN	NaN	NaN	NaN	NaN	NaN
IBRUTINIB	t4_14_	NaN	NaN	NaN	NaN	NaN	NaN	NaN	NaN
IBRUTINIB	del_1p_	NaN	NaN	NaN	NaN	NaN	NaN	NaN	NaN
IBRUTINIB	del_13q_	NaN	NaN	NaN	NaN	NaN	NaN	NaN	NaN
IBRUTINIB	del_17p_	NaN	NaN	NaN	NaN	NaN	NaN	NaN	NaN
IBRUTINIB	amp_dup_1q21_	NaN	NaN	NaN	NaN	NaN	NaN	NaN	NaN
IDELALISIB	t11_14_	NaN	NaN	NaN	NaN	NaN	NaN	NaN	NaN
IDELALISIB	t14_16_	NaN	NaN	NaN	NaN	NaN	NaN	NaN	NaN
IDELALISIB	t4_14_	NaN	NaN	NaN	NaN	NaN	NaN	NaN	NaN
IDELALISIB	del_1p_	NaN	NaN	NaN	NaN	NaN	NaN	NaN	NaN
IDELALISIB	del_13q_	NaN	NaN	NaN	NaN	NaN	NaN	NaN	NaN
IDELALISIB	del_17p_	NaN	NaN	NaN	NaN	NaN	NaN	NaN	NaN
IDELALISIB	amp_dup_1q21_	NaN	NaN	NaN	NaN	NaN	NaN	NaN	NaN
INCB054329	t11_14_	0.976349	0.436081	3.97886	0.0880248	1.52628	2.61649	0.616174	0.616174
INCB054329	t14_16_	-0.578432	0.836583	-1.78463	0.386018	1.46402	3.34633	0.90071	1.93009
INCB054329	t4_14_	0.578432	0.727945	-1.78514	0.555144	1.69854	3.63972	0.971502	2.22058
INCB054329	del_1p_	NaN	NaN	NaN	NaN	NaN	NaN	NaN	NaN
INCB054329	del_13q_	0.177492	0.99136	0.99409	0.384043	1.15659	1.98272	1.34415	2.30426
INCB054329	del_17p_	-1.50642	0.284287	1.89963	0.917375	1.99001	1.99001	1.28432	2.75212
INCB054329	amp_dup_1q21_	-0.0470528	0.858828	-2.14602	0.961275	1.20236	2.57648	1.12149	1.92255
INK128	t11_14_	-0.801909	0.358615	0.408848	0.115674	2.51031	2.51031	0.269906	0.57837
INK128	t14_16_	-4.47953	0.623363	-0.673116	0.766716	0.872709	1.87009	0.894502	1.53343
INK128	t4_14_	1.56976	0.795973	0.549779	0.787865	0.795973	0.795973	0.787865	0.787865
INK128	del_1p_	1.98899	0.368396	0.240133	0.0090335	1.28939	2.21037	0.0632345	0.0632345
INK128	del_13q_	0.159478	0.781931	-0.113494	0.295593	0.912253	1.56386	0.517288	1.18237
INK128	del_17p_	0.159478	0.416501	0.0440125	0.609696	0.971835	2.0825	0.853574	1.82909
INK128	amp_dup_1q21_	0.159478	0.565537	-0.223918	0.0779271	0.98969	2.26215	0.272745	0.467562
IXAZOMIB	t11_14_	0.371367	0.198424	0.188061	0.39181	0.462988	0.992118	0.914223	1.95905
IXAZOMIB	t14_16_	-0.0941222	0.716613	0.00931321	0.9224	1.00326	2.14984	0.9224	0.9224
IXAZOMIB	t4_14_	0.0213737	0.951478	0.620831	0.797792	0.951478	0.951478	1.11691	2.39338
IXAZOMIB	del_1p_	-0.0185757	0.945141	-0.331607	0.70969	1.10266	1.89028	1.24196	2.83876
IXAZOMIB	del_13q_	-0.0999538	0.463512	0.144931	0.810386	0.811147	1.85405	0.94545	1.62077
IXAZOMIB	del_17p_	0.489533	0.00223503	0.0505295	0.103364	0.0156452	0.0156452	0.723549	0.723549
IXAZOMIB	amp_dup_1q21_	-0.365549	0.0474198	-0.125614	0.34742	0.165969	0.284519	1.21597	2.08452
JNK-IN-8	t11_14_	0.102859	0.759242	-0.00669046	0.682665	1.06294	2.27773	1.19466	2.73066
JNK-IN-8	t14_16_	NaN	NaN	NaN	NaN	NaN	NaN	NaN	NaN
JNK-IN-8	t4_14_	0.0643276	0.499425	0.175124	0.587713	1.74799	2.99655	1.37133	2.93857
JNK-IN-8	del_1p_	-0.131658	0.823411	0.228937	0.240904	0.960646	1.64682	1.68632	1.68632
JNK-IN-8	del_13q_	0.045174	0.519213	-0.0616432	0.289996	1.2115	2.59607	1.01499	1.73998
JNK-IN-8	del_17p_	0.226276	0.599306	-0.19297	0.893232	1.04879	2.39722	1.25052	2.67969
JNK-IN-8	amp_dup_1q21_	-0.254768	0.113475	-0.157477	0.902454	0.794327	0.794327	1.05286	1.80491
KPT	t11_14_	0.671119	0.0818193	2.14924	0.0241605	0.286367	0.490916	0.169123	0.169123
KPT	t14_16_	0.781878	0.992147	-1.46579	0.266411	0.992147	0.992147	0.621626	1.33206
KPT	t4_14_	1.69473	0.212649	2.59303	0.273873	0.496182	1.06325	0.479277	1.09549
KPT	del_1p_	-0.287282	0.77021	0.409594	0.399589	1.07829	2.31063	0.559424	1.19877
KPT	del_13q_	1.02831	0.0394622	0.598019	0.456018	0.276235	0.276235	0.532021	0.912036
KPT	del_17p_	0.698731	0.775384	-0.928392	0.0456919	0.904615	1.55077	0.159922	0.274151
KPT	amp_dup_1q21_	-0.807355	0.490053	-1.44508	0.496579	0.857592	1.96021	0.496579	0.496579
LEN	t11_14_	NaN	NaN	4.06749	0.00117137	NaN	NaN	0.00819956	0.00819956
LEN	t14_16_	1.25808	0.334591	-1.36392	0.342869	1.17107	2.00754	0.480016	1.02861
LEN	t4_14_	NaN	NaN	-4.57716	0.526319	NaN	NaN	0.614039	1.05264
LEN	del_1p_	NaN	NaN	-2.468	0.19799	NaN	NaN	0.461977	0.98995
LEN	del_13q_	0.0744499	0.871544	0.0296156	0.710759	2.0336	4.35772	0.710759	0.710759
LEN	del_17p_	-1.3342	0.299406	-0.835262	0.183906	2.09584	2.09584	0.643669	1.10343
LEN	amp_dup_1q21_	NaN	NaN	-2.57998	0.306613	NaN	NaN	0.536573	1.22645
LINIFANIB	t11_14_	NaN	NaN	NaN	NaN	NaN	NaN	NaN	NaN
LINIFANIB	t14_16_	NaN	NaN	NaN	NaN	NaN	NaN	NaN	NaN
LINIFANIB	t4_14_	NaN	NaN	NaN	NaN	NaN	NaN	NaN	NaN
LINIFANIB	del_1p_	NaN	NaN	NaN	NaN	NaN	NaN	NaN	NaN
LINIFANIB	del_13q_	-0.216341	0.730889	-0.120555	0.485636	2.55811	4.38533	3.39945	3.39945
LINIFANIB	del_17p_	NaN	NaN	NaN	NaN	NaN	NaN	NaN	NaN
LINIFANIB	amp_dup_1q21_	-0.30566	0.602444	-0.471529	0.489976	4.21711	4.21711	1.71492	2.93986
LOSMAPIMOD	t11_14_	NaN	NaN	NaN	NaN	NaN	NaN	NaN	NaN
LOSMAPIMOD	t14_16_	NaN	NaN	NaN	NaN	NaN	NaN	NaN	NaN
LOSMAPIMOD	t4_14_	NaN	NaN	2.86624	NaN	NaN	NaN	NaN	NaN
LOSMAPIMOD	del_1p_	NaN	NaN	NaN	NaN	NaN	NaN	NaN	NaN
LOSMAPIMOD	del_13q_	NaN	NaN	2.86624	NaN	NaN	NaN	NaN	NaN
LOSMAPIMOD	del_17p_	NaN	NaN	-2.86624	NaN	NaN	NaN	NaN	NaN
LOSMAPIMOD	amp_dup_1q21_	NaN	NaN	NaN	NaN	NaN	NaN	NaN	NaN
LY2603618	t11_14_	NaN	NaN	NaN	NaN	NaN	NaN	NaN	NaN
LY2603618	t14_16_	NaN	NaN	NaN	NaN	NaN	NaN	NaN	NaN
LY2603618	t4_14_	NaN	NaN	NaN	NaN	NaN	NaN	NaN	NaN
LY2603618	del_1p_	NaN	NaN	NaN	NaN	NaN	NaN	NaN	NaN
LY2603618	del_13q_	NaN	NaN	0.115204	0.951778	NaN	NaN	3.33122	5.71067
LY2603618	del_17p_	NaN	NaN	-1.88502	0.285111	NaN	NaN	1.99578	1.99578
LY2603618	amp_dup_1q21_	NaN	NaN	-0.115204	0.951778	NaN	NaN	2.22082	4.75889
MA7-038	t11_14_	NaN	NaN	NaN	NaN	NaN	NaN	NaN	NaN
MA7-038	t14_16_	NaN	NaN	NaN	NaN	NaN	NaN	NaN	NaN
MA7-038	t4_14_	NaN	NaN	NaN	NaN	NaN	NaN	NaN	NaN
MA7-038	del_1p_	NaN	NaN	NaN	NaN	NaN	NaN	NaN	NaN
MA7-038	del_13q_	NaN	NaN	NaN	NaN	NaN	NaN	NaN	NaN
MA7-038	del_17p_	NaN	NaN	NaN	NaN	NaN	NaN	NaN	NaN
MA7-038	amp_dup_1q21_	NaN	NaN	NaN	NaN	NaN	NaN	NaN	NaN
MARK-INHIBITOR	t11_14_	NaN	NaN	NaN	NaN	NaN	NaN	NaN	NaN
MARK-INHIBITOR	t14_16_	NaN	NaN	NaN	NaN	NaN	NaN	NaN	NaN
MARK-INHIBITOR	t4_14_	NaN	NaN	NaN	NaN	NaN	NaN	NaN	NaN
MARK-INHIBITOR	del_1p_	NaN	NaN	NaN	NaN	NaN	NaN	NaN	NaN
MARK-INHIBITOR	del_13q_	NaN	NaN	NaN	NaN	NaN	NaN	NaN	NaN
MARK-INHIBITOR	del_17p_	NaN	NaN	NaN	NaN	NaN	NaN	NaN	NaN
MARK-INHIBITOR	amp_dup_1q21_	NaN	NaN	NaN	NaN	NaN	NaN	NaN	NaN
MEL	t11_14_	0.254479	0.874544	1.41534	0.337473	0.874544	0.874544	0.590578	1.34989
MEL	t14_16_	-3.89426	0.313542	-2.75427	0.604467	0.731597	1.56771	0.705211	1.20893
MEL	t4_14_	0.106017	0.31007	0.500432	0.277913	1.08524	1.86042	0.648463	1.38956
MEL	del_1p_	-3.64998	0.0246832	-2.49162	0.040799	0.172782	0.172782	0.142797	0.244794
MEL	del_13q_	0.22111	0.504804	-0.147366	0.97427	0.706725	1.51441	0.97427	0.97427
MEL	del_17p_	-0.0455408	0.342052	-0.768637	0.455732	0.59859	1.36821	0.638025	1.3672
MEL	amp_dup_1q21_	-0.515	0.635873	-0.492529	0.0176281	0.741852	1.27175	0.123397	0.123397
MK2206	t11_14_	0.126973	0.946879	0.497162	0.762655	1.10469	1.89376	0.889764	1.52531
MK2206	t14_16_	0.283724	0.864823	-0.384564	0.553119	1.21075	2.59447	0.774366	1.65936
MK2206	t4_14_	1.35364	0.075004	-1.20632	0.455952	0.525028	0.525028	1.06389	2.27976
MK2206	del_1p_	NaN	NaN	NaN	NaN	NaN	NaN	NaN	NaN
MK2206	del_13q_	0.18475	0.820446	-1.74037	0.101475	1.91438	4.10223	0.710326	0.710326
MK2206	del_17p_	0.126973	0.843189	0.104795	0.348591	1.47558	3.37276	1.22007	2.09155
MK2206	amp_dup_1q21_	0.286548	0.692919	1.04576	0.500665	2.42522	4.15751	0.876164	2.00266
MOMELOTINIB	t11_14_	NaN	NaN	NaN	NaN	NaN	NaN	NaN	NaN
MOMELOTINIB	t14_16_	NaN	NaN	NaN	NaN	NaN	NaN	NaN	NaN
MOMELOTINIB	t4_14_	NaN	NaN	NaN	NaN	NaN	NaN	NaN	NaN
MOMELOTINIB	del_1p_	NaN	NaN	NaN	NaN	NaN	NaN	NaN	NaN
MOMELOTINIB	del_13q_	-0.243003	0.854297	-0.315593	0.55917	2.99004	5.12578	3.91419	3.91419
MOMELOTINIB	del_17p_	NaN	NaN	NaN	NaN	NaN	NaN	NaN	NaN
MOMELOTINIB	amp_dup_1q21_	-0.607614	0.374716	-0.434833	0.581926	2.62301	2.62301	2.03674	3.49156
MOTESANIB	t11_14_	NaN	NaN	0.337308	0.817207	NaN	NaN	1.90682	4.08604
MOTESANIB	t14_16_	NaN	NaN	NaN	NaN	NaN	NaN	NaN	NaN
MOTESANIB	t4_14_	NaN	NaN	-1.51817	0.15054	NaN	NaN	1.05378	1.05378
MOTESANIB	del_1p_	NaN	NaN	NaN	NaN	NaN	NaN	NaN	NaN
MOTESANIB	del_13q_	NaN	NaN	-0.337308	0.817207	NaN	NaN	1.43011	3.26883
MOTESANIB	del_17p_	NaN	NaN	NaN	NaN	NaN	NaN	NaN	NaN
MOTESANIB	amp_dup_1q21_	NaN	NaN	-1.51817	0.15054	NaN	NaN	0.526892	0.903243
MTI101	t11_14_	-0.164811	0.272025	-0.466552	0.0974103	0.952089	1.63215	0.340936	0.584462
MTI101	t14_16_	0.756915	0.438395	0.0617914	0.784008	1.02292	2.19197	0.914675	1.56802
MTI101	t4_14_	-0.361336	0.469202	-0.031312	0.950755	0.821104	1.87681	0.950755	0.950755
MTI101	del_1p_	0.624242	0.76146	0.297488	0.00241104	0.76146	0.76146	0.0168773	0.0168773
MTI101	del_13q_	0.567607	0.0662005	0.512747	0.138233	0.463403	0.463403	0.322543	0.691163
MTI101	del_17p_	0.155651	0.554936	0.0485586	0.621334	0.776911	1.66481	1.08734	2.48534
MTI101	amp_dup_1q21_	-0.59998	0.676592	-0.16775	0.757091	0.789358	1.35318	1.05993	2.27127
MYC	t11_14_	NaN	NaN	NaN	NaN	NaN	NaN	NaN	NaN
MYC	t14_16_	NaN	NaN	NaN	NaN	NaN	NaN	NaN	NaN
MYC	t4_14_	NaN	NaN	NaN	NaN	NaN	NaN	NaN	NaN
MYC	del_1p_	NaN	NaN	NaN	NaN	NaN	NaN	NaN	NaN
MYC	del_13q_	NaN	NaN	NaN	NaN	NaN	NaN	NaN	NaN
MYC	del_17p_	NaN	NaN	NaN	NaN	NaN	NaN	NaN	NaN
MYC	amp_dup_1q21_	NaN	NaN	NaN	NaN	NaN	NaN	NaN	NaN
NICLOSAMIDE	t11_14_	-1.08246	0.00496861	-2.13583	0.0402987	0.0347803	0.0347803	0.282091	0.282091
NICLOSAMIDE	t14_16_	NaN	NaN	NaN	NaN	NaN	NaN	NaN	NaN
NICLOSAMIDE	t4_14_	0.531782	0.15285	0.873303	0.353218	0.534975	0.917099	0.824176	1.76609
NICLOSAMIDE	del_1p_	NaN	NaN	NaN	NaN	NaN	NaN	NaN	NaN
NICLOSAMIDE	del_13q_	NaN	NaN	NaN	NaN	NaN	NaN	NaN	NaN
NICLOSAMIDE	del_17p_	0.186277	0.589845	-0.626374	0.707402	1.3763	2.94922	1.23795	2.82961
NICLOSAMIDE	amp_dup_1q21_	0.332947	0.79077	1.39878	0.192055	1.38385	3.16308	0.672194	1.15233
NU-7441	t11_14_	NaN	NaN	-0.283719	0.415606	NaN	NaN	1.45462	2.49364
NU-7441	t14_16_	NaN	NaN	NaN	NaN	NaN	NaN	NaN	NaN
NU-7441	t4_14_	NaN	NaN	0.800784	0.163727	NaN	NaN	1.14609	1.14609
NU-7441	del_1p_	NaN	NaN	0.283719	0.736057	NaN	NaN	1.2881	2.94423
NU-7441	del_13q_	NaN	NaN	-0.480625	0.490263	NaN	NaN	1.14395	2.45131
NU-7441	del_17p_	2.53967	NaN	-0.346919	0.843279	NaN	NaN	1.18059	2.52984
NU-7441	amp_dup_1q21_	NaN	NaN	0.010363	0.931731	NaN	NaN	1.08702	1.86346
OPR	t11_14_	0.2034	0.703332	0.720768	0.171437	1.64111	3.51666	1.20006	1.20006
OPR	t14_16_	NaN	NaN	NaN	NaN	NaN	NaN	NaN	NaN
OPR	t4_14_	0.0790079	0.841037	0.173344	0.72343	1.47181	3.36415	1.688	3.61715
OPR	del_1p_	NaN	NaN	NaN	NaN	NaN	NaN	NaN	NaN
OPR	del_13q_	-0.250466	0.389209	-0.537842	0.279756	2.72446	2.72446	0.979147	1.67854
OPR	del_17p_	NaN	NaN	NaN	NaN	NaN	NaN	NaN	NaN
OPR	amp_dup_1q21_	-0.0859139	0.436369	-0.317208	0.819553	1.52729	2.61821	1.43422	3.27821
OTSSP167	t11_14_	NaN	NaN	NaN	NaN	NaN	NaN	NaN	NaN
OTSSP167	t14_16_	NaN	NaN	NaN	NaN	NaN	NaN	NaN	NaN
OTSSP167	t4_14_	-1.32266	0.430906	-1.64333	0.317635	1.50817	2.58544	0.741149	1.58818
OTSSP167	del_1p_	NaN	NaN	NaN	NaN	NaN	NaN	NaN	NaN
OTSSP167	del_13q_	-0.236011	0.807567	1.35724	0.220534	1.88432	4.03783	0.771869	1.3232
OTSSP167	del_17p_	1.04907	0.847215	0.589397	0.589268	1.48263	3.38886	1.03122	2.35707
OTSSP167	amp_dup_1q21_	-1.66474	0.10354	-1.52608	0.171489	0.72478	0.72478	1.20042	1.20042
PALBOCICLIB	t11_14_	NaN	NaN	0.795206	0.16588	NaN	NaN	1.16116	1.16116
PALBOCICLIB	t14_16_	NaN	NaN	NaN	NaN	NaN	NaN	NaN	NaN
PALBOCICLIB	t4_14_	NaN	NaN	NaN	NaN	NaN	NaN	NaN	NaN
PALBOCICLIB	del_1p_	NaN	NaN	0.702725	0.264519	NaN	NaN	0.617212	1.3226
PALBOCICLIB	del_13q_	0.0491944	0.833662	0.139183	0.589214	2.91782	5.00197	0.8249	1.76764
PALBOCICLIB	del_17p_	NaN	NaN	0.795206	0.16588	NaN	NaN	0.58058	0.99528
PALBOCICLIB	amp_dup_1q21_	-0.538799	0.339554	-0.426485	0.32867	2.37688	2.37688	0.575172	1.31468
PANOBINOSTAT	t11_14_	0.221324	0.163158	0.744916	0.00162437	0.380701	0.815788	0.00568529	0.00974621
PANOBINOSTAT	t14_16_	-0.0212686	0.524838	-0.0659411	0.883446	0.918467	2.09935	0.883446	0.883446
PANOBINOSTAT	t4_14_	0.0352755	0.792696	-0.143852	0.736926	1.10977	2.37809	0.859748	1.47385
PANOBINOSTAT	del_1p_	0.17073	0.871154	0.286975	0.721304	1.01635	1.74231	1.00983	2.16391
PANOBINOSTAT	del_13q_	0.263723	0.127422	0.0404723	0.503263	0.445976	0.76453	0.88071	2.01305
PANOBINOSTAT	del_17p_	-0.0764279	0.96536	-0.117154	0.171565	0.96536	0.96536	0.400319	0.857827
PANOBINOSTAT	amp_dup_1q21_	-0.419084	0.0323036	-0.835297	0.00022793	0.226125	0.226125	0.00159551	0.00159551
POM	t11_14_	NaN	NaN	4.08888	0.138864	NaN	NaN	0.972047	0.972047
POM	t14_16_	-0.350412	0.781471	-2.92294	0.392516	1.36757	3.12588	0.915871	1.96258
POM	t4_14_	NaN	NaN	2.79518	0.632217	NaN	NaN	0.737587	1.26443
POM	del_1p_	1.28107	0.0892788	1.48712	0.285877	0.624951	0.624951	1.00057	1.71526
POM	del_13q_	0.223974	0.801088	-2.4734	0.55017	1.12152	2.40326	0.770238	1.65051
POM	del_17p_	-0.350412	0.71167	-2.41474	0.669825	1.66056	3.55835	0.669825	0.669825
POM	amp_dup_1q21_	-0.963714	0.257931	-3.78528	0.456545	0.902758	1.54759	0.798955	1.82618
PONATINIB	t11_14_	0.248498	0.368806	-0.013372	0.89899	0.860548	1.84403	1.25859	2.69697
PONATINIB	t14_16_	0.911544	0.087671	-0.956552	0.364893	0.613697	0.613697	2.55425	2.55425
PONATINIB	t4_14_	-0.669033	0.323768	-0.377376	0.439529	1.13319	1.94261	1.02557	2.19764
PONATINIB	del_1p_	NaN	NaN	NaN	NaN	NaN	NaN	NaN	NaN
PONATINIB	del_13q_	0.107528	0.614537	0.544003	0.920411	0.860352	1.84361	1.07381	1.84082
PONATINIB	del_17p_	0.175329	0.715451	0.0749095	0.433877	0.834692	1.4309	1.51857	2.60326
PONATINIB	amp_dup_1q21_	0.0442644	0.45443	0.678729	0.506883	0.795252	1.81772	0.887046	2.02753
PYRVINIUM	t11_14_	0.784218	0.121083	0.59814	0.0170228	0.423791	0.726499	0.119159	0.119159
PYRVINIUM	t14_16_	NaN	NaN	NaN	NaN	NaN	NaN	NaN	NaN
PYRVINIUM	t4_14_	-0.472601	0.697059	-0.828224	0.289343	0.813236	1.39412	0.675133	1.44671
PYRVINIUM	del_1p_	-1.40736	0.353419	0.308852	0.622972	0.618483	1.41368	0.872161	1.86892
PYRVINIUM	del_13q_	0.372704	0.592265	-0.464512	0.63063	0.829171	1.7768	0.735735	1.26126
PYRVINIUM	del_17p_	-2.39188	0.106862	-0.829444	0.423859	0.748032	0.748032	0.741754	1.69544
PYRVINIUM	amp_dup_1q21_	-1.20509	0.197607	-2.52499	0.0220145	0.461083	0.988035	0.0770509	0.132087
QST	t11_14_	NaN	NaN	NaN	NaN	NaN	NaN	NaN	NaN
QST	t14_16_	NaN	NaN	NaN	NaN	NaN	NaN	NaN	NaN
QST	t4_14_	NaN	NaN	NaN	NaN	NaN	NaN	NaN	NaN
QST	del_1p_	NaN	NaN	NaN	NaN	NaN	NaN	NaN	NaN
QST	del_13q_	NaN	NaN	NaN	NaN	NaN	NaN	NaN	NaN
QST	del_17p_	NaN	NaN	NaN	NaN	NaN	NaN	NaN	NaN
QST	amp_dup_1q21_	NaN	NaN	NaN	NaN	NaN	NaN	NaN	NaN
R406	t11_14_	0.904671	0.134075	-1.00651	0.186175	0.312841	0.670374	0.434408	0.930875
R406	t14_16_	NaN	NaN	NaN	NaN	NaN	NaN	NaN	NaN
R406	t4_14_	-0.296132	0.817356	2.07275	0.532342	1.1443	2.45207	0.745279	1.59703
R406	del_1p_	-0.277985	0.829108	-0.97583	0.175548	0.967293	1.65822	0.614418	1.05329
R406	del_13q_	-1.15852	0.179367	1.12715	0.160053	0.313892	0.717468	1.12037	1.12037
R406	del_17p_	1.32673	0.0344201	-0.867756	0.339	0.24094	0.24094	0.59325	1.356
R406	amp_dup_1q21_	-1.32673	0.0344201	-0.571982	0.956523	0.12047	0.20652	1.11594	1.91305
RALIMETINIB	t11_14_	NaN	NaN	NaN	NaN	NaN	NaN	NaN	NaN
RALIMETINIB	t14_16_	NaN	NaN	NaN	NaN	NaN	NaN	NaN	NaN
RALIMETINIB	t4_14_	NaN	NaN	NaN	NaN	NaN	NaN	NaN	NaN
RALIMETINIB	del_1p_	NaN	NaN	NaN	NaN	NaN	NaN	NaN	NaN
RALIMETINIB	del_13q_	NaN	NaN	NaN	NaN	NaN	NaN	NaN	NaN
RALIMETINIB	del_17p_	NaN	NaN	NaN	NaN	NaN	NaN	NaN	NaN
RALIMETINIB	amp_dup_1q21_	NaN	NaN	NaN	NaN	NaN	NaN	NaN	NaN
RICOLINOSTAT	t11_14_	0.244845	0.2233	0.499369	0.315605	0.781549	1.3398	1.10462	1.89363
RICOLINOSTAT	t14_16_	0.328075	0.535275	0.149363	0.496138	1.24898	2.67638	0.868241	1.98455
RICOLINOSTAT	t4_14_	-1.04542	0.195471	-3.49639	0.0731282	1.3683	1.3683	0.511898	0.511898
RICOLINOSTAT	del_1p_	NaN	NaN	NaN	NaN	NaN	NaN	NaN	NaN
RICOLINOSTAT	del_13q_	0.00120375	0.606934	1.03422	0.425683	0.849707	1.8208	0.993261	2.12842
RICOLINOSTAT	del_17p_	0.0876045	0.856174	0.149363	0.658734	0.99887	1.71235	0.922227	1.9762
RICOLINOSTAT	amp_dup_1q21_	0.00120375	0.559839	0.38681	0.993513	0.979718	2.23935	1.1591	1.98703
RUXOLITINIB	t11_14_	NaN	NaN	NaN	NaN	NaN	NaN	NaN	NaN
RUXOLITINIB	t14_16_	NaN	NaN	NaN	NaN	NaN	NaN	NaN	NaN
RUXOLITINIB	t4_14_	NaN	NaN	NaN	NaN	NaN	NaN	NaN	NaN
RUXOLITINIB	del_1p_	-6.00067	NaN	-2.97846	0.609459	NaN	NaN	2.13311	3.65676
RUXOLITINIB	del_13q_	6.00067	NaN	3.19091	0.224604	NaN	NaN	1.57223	1.57223
RUXOLITINIB	del_17p_	NaN	NaN	NaN	NaN	NaN	NaN	NaN	NaN
RUXOLITINIB	amp_dup_1q21_	NaN	NaN	-3.29003	0.862214	NaN	NaN	2.01183	4.31107
SELUMETINIB	t11_14_	NaN	NaN	2.90635	0.189514	NaN	NaN	1.3266	1.3266
SELUMETINIB	t14_16_	NaN	NaN	NaN	NaN	NaN	NaN	NaN	NaN
SELUMETINIB	t4_14_	NaN	NaN	NaN	NaN	NaN	NaN	NaN	NaN
SELUMETINIB	del_1p_	NaN	NaN	NaN	NaN	NaN	NaN	NaN	NaN
SELUMETINIB	del_13q_	NaN	NaN	-1.97544	0.395927	NaN	NaN	0.923831	1.97964
SELUMETINIB	del_17p_	NaN	NaN	NaN	NaN	NaN	NaN	NaN	NaN
SELUMETINIB	amp_dup_1q21_	NaN	NaN	-2.90635	0.189514	NaN	NaN	0.663298	1.13708
SILMITASERTIB	t11_14_	0.0552824	0.972651	0.767438	0.714452	1.13476	1.9453	1.25029	2.85781
SILMITASERTIB	t14_16_	-0.328814	0.676527	-0.939149	0.326157	1.18392	2.70611	0.761034	1.63079
SILMITASERTIB	t4_14_	-0.393132	0.562747	-0.94223	0.156794	1.31308	2.81373	1.09755	1.09755
SILMITASERTIB	del_1p_	0.445694	0.406865	0.2103	0.951573	1.42403	2.44119	1.11017	1.90315
SILMITASERTIB	del_13q_	-0.780219	0.0747388	0.160601	0.945379	0.523172	0.523172	1.32353	2.83614
SILMITASERTIB	del_17p_	-0.328814	0.676527	0.928782	0.265639	0.947138	2.02958	0.929737	1.59383
SILMITASERTIB	amp_dup_1q21_	-0.0552824	0.998639	0.190723	0.952175	0.998639	0.998639	0.952175	0.952175
SNS-032	t11_14_	0.348533	0.50682	0.361854	0.736955	0.709549	1.52046	0.85978	1.47391
SNS-032	t14_16_	-0.237375	0.430144	-0.232769	0.556537	0.752753	1.72058	1.29859	2.78269
SNS-032	t4_14_	-0.11273	0.622898	-0.10791	0.732726	0.622898	0.622898	1.02582	2.19818
SNS-032	del_1p_	-0.346572	0.311894	-0.150002	0.531062	0.727753	1.55947	3.71743	3.71743
SNS-032	del_13q_	0.00118108	0.299339	-0.0475059	0.578393	1.04769	1.79603	1.01219	2.31357
SNS-032	del_17p_	0.0214089	0.269314	0.077823	0.839998	1.8852	1.8852	0.839998	0.839998
SNS-032	amp_dup_1q21_	-0.338438	0.620562	-0.0319105	0.547147	0.723989	1.24112	1.91501	3.28288
TAI-1	t11_14_	0.708312	0.816298	-0.957689	0.265974	1.14282	2.44889	0.930911	1.59585
TAI-1	t14_16_	NaN	NaN	NaN	NaN	NaN	NaN	NaN	NaN
TAI-1	t4_14_	1.19887	0.737665	-1.10589	0.51905	1.29091	2.95066	0.908338	2.0762
TAI-1	del_1p_	NaN	NaN	1.53551	0.699867	NaN	NaN	0.979814	2.0996
TAI-1	del_13q_	-1.96789	0.346346	-0.57505	0.971377	1.21221	2.07807	1.13327	1.94275
TAI-1	del_17p_	-1.85944	0.248425	-0.732235	0.304196	1.73898	1.73898	0.70979	1.52098
TAI-1	amp_dup_1q21_	-1.96789	0.346346	-0.942776	0.104097	0.80814	1.73173	0.728681	0.728681
THZ1	t11_14_	-0.192121	0.911103	-0.380005	0.636229	1.27554	2.73331	0.742267	1.27246
THZ1	t14_16_	0.238512	0.656434	0.637917	0.87886	1.14876	2.62573	0.87886	0.87886
THZ1	t4_14_	-1.55877	0.351629	-1.85687	0.363617	0.820467	1.75814	0.636329	1.45447
THZ1	del_1p_	0.932096	0.0573653	0.9509	0.240061	0.401557	0.401557	0.840214	1.44037
THZ1	del_13q_	-0.192121	0.943854	0.27025	0.253987	0.943854	0.943854	0.592636	1.26994
THZ1	del_17p_	-0.283793	0.313341	-0.597598	0.221385	1.09669	1.88005	1.5497	1.5497
THZ1	amp_dup_1q21_	-0.470142	0.911335	-0.572507	0.606058	1.06322	1.82267	0.848481	1.81817
TOZASERTIB	t11_14_	NaN	NaN	NaN	NaN	NaN	NaN	NaN	NaN
TOZASERTIB	t14_16_	NaN	NaN	NaN	NaN	NaN	NaN	NaN	NaN
TOZASERTIB	t4_14_	NaN	NaN	NaN	NaN	NaN	NaN	NaN	NaN
TOZASERTIB	del_1p_	NaN	NaN	NaN	NaN	NaN	NaN	NaN	NaN
TOZASERTIB	del_13q_	-0.947429	0.497546	-2.17473	0.163023	3.48282	3.48282	1.14116	1.14116
TOZASERTIB	del_17p_	NaN	NaN	NaN	NaN	NaN	NaN	NaN	NaN
TOZASERTIB	amp_dup_1q21_	-0.354396	0.835787	0.708642	0.74233	2.92525	5.01472	2.59815	4.45398
TRAMETINIB	t11_14_	NaN	NaN	NaN	NaN	NaN	NaN	NaN	NaN
TRAMETINIB	t14_16_	NaN	NaN	NaN	NaN	NaN	NaN	NaN	NaN
TRAMETINIB	t4_14_	NaN	NaN	NaN	NaN	NaN	NaN	NaN	NaN
TRAMETINIB	del_1p_	NaN	NaN	NaN	NaN	NaN	NaN	NaN	NaN
TRAMETINIB	del_13q_	NaN	NaN	0.193436	0.38294	NaN	NaN	1.34029	2.29764
TRAMETINIB	del_17p_	NaN	NaN	NaN	NaN	NaN	NaN	NaN	NaN
TRAMETINIB	amp_dup_1q21_	NaN	NaN	-4.89624	4.59007e-08	NaN	NaN	3.21305e-07	3.21305e-07
UMI-77	t11_14_	NaN	NaN	1.04673	0.204636	NaN	NaN	1.43245	1.43245
UMI-77	t14_16_	NaN	NaN	NaN	NaN	NaN	NaN	NaN	NaN
UMI-77	t4_14_	NaN	NaN	-0.473451	0.582637	NaN	NaN	1.35949	2.91318
UMI-77	del_1p_	NaN	NaN	NaN	NaN	NaN	NaN	NaN	NaN
UMI-77	del_13q_	NaN	NaN	0.543727	0.640764	NaN	NaN	1.12134	2.56306
UMI-77	del_17p_	NaN	NaN	0.300835	0.860736	NaN	NaN	1.20503	2.58221
UMI-77	amp_dup_1q21_	NaN	NaN	-0.989745	0.347339	NaN	NaN	1.21569	2.08403
VEMURAFENIB	t11_14_	NaN	NaN	NaN	NaN	NaN	NaN	NaN	NaN
VEMURAFENIB	t14_16_	NaN	NaN	NaN	NaN	NaN	NaN	NaN	NaN
VEMURAFENIB	t4_14_	NaN	NaN	NaN	NaN	NaN	NaN	NaN	NaN
VEMURAFENIB	del_1p_	NaN	NaN	NaN	NaN	NaN	NaN	NaN	NaN
VEMURAFENIB	del_13q_	NaN	NaN	NaN	NaN	NaN	NaN	NaN	NaN
VEMURAFENIB	del_17p_	NaN	NaN	NaN	NaN	NaN	NaN	NaN	NaN
VEMURAFENIB	amp_dup_1q21_	NaN	NaN	NaN	NaN	NaN	NaN	NaN	NaN

## Sheet: Mutations_Driver_AUC
DrugName	Mutation	Median_Difference_AUC	Nominal_p_value	FDR_q_value	FWER_q_value
A-1210477	ABCF1	NaN	NaN	NaN	NaN
A-1210477	ACTG1	NaN	NaN	NaN	NaN
A-1210477	ARID1A	NaN	NaN	NaN	NaN
A-1210477	ARID2	-2.29211	0.975825	7.51385	66.3561
A-1210477	ATM	NaN	NaN	NaN	NaN
A-1210477	ATRX	NaN	NaN	NaN	NaN
A-1210477	BCL7A	NaN	NaN	NaN	NaN
A-1210477	BHLHE41	NaN	NaN	NaN	NaN
A-1210477	BRAF	NaN	NaN	NaN	NaN
A-1210477	BTG1	NaN	NaN	NaN	NaN
A-1210477	CCND1	NaN	NaN	NaN	NaN
A-1210477	CDKN1B	NaN	NaN	NaN	NaN
A-1210477	CDKN2C	NaN	NaN	NaN	NaN
A-1210477	CREBBP	NaN	NaN	NaN	NaN
A-1210477	CYLD	NaN	NaN	NaN	NaN
A-1210477	DIS3	NaN	NaN	NaN	NaN
A-1210477	DNMT3A	NaN	NaN	NaN	NaN
A-1210477	DTX1	NaN	NaN	NaN	NaN
A-1210477	DUSP2	NaN	NaN	NaN	NaN
A-1210477	EGR1	NaN	NaN	NaN	NaN
A-1210477	EP300	-17.9631	0.105808	4.07362	8.04142
A-1210477	FGFR3	NaN	NaN	NaN	NaN
A-1210477	FUBP1	NaN	NaN	NaN	NaN
A-1210477	HIST1H1B	NaN	NaN	NaN	NaN
A-1210477	HIST1H1D	NaN	NaN	NaN	NaN
A-1210477	HIST1H1E	NaN	NaN	NaN	NaN
A-1210477	HIST1H2BK	NaN	NaN	NaN	NaN
A-1210477	HUWE1	NaN	NaN	NaN	NaN
A-1210477	IDH1	NaN	NaN	NaN	NaN
A-1210477	IDH2	NaN	NaN	NaN	NaN
A-1210477	IGLL5	-19.6216	0.00738817	0.568889	0.568889
A-1210477	IRF4	NaN	NaN	NaN	NaN
A-1210477	KDM5C	NaN	NaN	NaN	NaN
A-1210477	KDM6A	1.02245	0.802437	6.86529	55.3682
A-1210477	KLHL6	NaN	NaN	NaN	NaN
A-1210477	KMT2B	NaN	NaN	NaN	NaN
A-1210477	KMT2C	7.03921	0.327501	4.20293	23.5801
A-1210477	KRAS	-17.4618	0.22171	4.26792	16.4065
A-1210477	LCE1D	NaN	NaN	NaN	NaN
A-1210477	LTB	NaN	NaN	NaN	NaN
A-1210477	MAF	NaN	NaN	NaN	NaN
A-1210477	MAFB	NaN	NaN	NaN	NaN
A-1210477	MAML2	NaN	NaN	NaN	NaN
A-1210477	MAN2C1	NaN	NaN	NaN	NaN
A-1210477	NCOR1	NaN	NaN	NaN	NaN
A-1210477	NF1	NaN	NaN	NaN	NaN
A-1210477	NFKB2	NaN	NaN	NaN	NaN
A-1210477	NFKBIA	NaN	NaN	NaN	NaN
A-1210477	NRAS	NaN	NaN	NaN	NaN
A-1210477	PABPC1	NaN	NaN	NaN	NaN
A-1210477	PIK3CA	NaN	NaN	NaN	NaN
A-1210477	PIM1	NaN	NaN	NaN	NaN
A-1210477	POT1	NaN	NaN	NaN	NaN
A-1210477	PRDM1	NaN	NaN	NaN	NaN
A-1210477	PRKD2	NaN	NaN	NaN	NaN
A-1210477	PTPN11	NaN	NaN	NaN	NaN
A-1210477	RASA2	5.89327	0.354465	3.89911	25.167
A-1210477	RB1	NaN	NaN	NaN	NaN
A-1210477	RFTN1	NaN	NaN	NaN	NaN
A-1210477	RPL10	NaN	NaN	NaN	NaN
A-1210477	RPL5	NaN	NaN	NaN	NaN
A-1210477	RPRD1B	NaN	NaN	NaN	NaN
A-1210477	RPS3A	NaN	NaN	NaN	NaN
A-1210477	SAMHD1	NaN	NaN	NaN	NaN
A-1210477	SETD2	NaN	NaN	NaN	NaN
A-1210477	SF3B1	NaN	NaN	NaN	NaN
A-1210477	SP140	NaN	NaN	NaN	NaN
A-1210477	TCL1A	NaN	NaN	NaN	NaN
A-1210477	TET2	-2.5167	0.790285	7.60649	55.3199
A-1210477	TGDS	NaN	NaN	NaN	NaN
A-1210477	TP53	NaN	NaN	NaN	NaN
A-1210477	TRAF2	NaN	NaN	NaN	NaN
A-1210477	TRAF3	-17.9631	0.105808	2.71574	7.93562
A-1210477	UBR5	11.2121	0.233185	3.59105	17.0225
A-1210477	XBP1	NaN	NaN	NaN	NaN
A-1210477	ZFP36L1	NaN	NaN	NaN	NaN
A-1210477	ZNF292	NaN	NaN	NaN	NaN
ABT-199	ABCF1	NaN	NaN	NaN	NaN
ABT-199	ACTG1	-20.4934	0.0985852	1.89777	7.29531
ABT-199	ARID1A	-2.70077	0.99189	1.44105	24.7972
ABT-199	ARID2	-21.4102	0.0809519	2.07777	6.07139
ABT-199	ATM	0.385942	0.925998	1.42604	25.9279
ABT-199	ATRX	NaN	NaN	NaN	NaN
ABT-199	BCL7A	-12.9149	0.412166	1.67036	24.3178
ABT-199	BHLHE41	NaN	NaN	NaN	NaN
ABT-199	BRAF	3.66105	0.682753	1.54623	30.0411
ABT-199	BTG1	-9.23531	0.603945	1.45324	27.7815
ABT-199	CCND1	-11.9994	0.427311	1.56681	24.3567
ABT-199	CDKN1B	NaN	NaN	NaN	NaN
ABT-199	CDKN2C	NaN	NaN	NaN	NaN
ABT-199	CREBBP	-12.7561	0.388326	1.75889	23.6879
ABT-199	CYLD	-3.74215	0.589244	1.51239	28.2837
ABT-199	DIS3	2.40318	0.826941	1.59186	31.4238
ABT-199	DNMT3A	NaN	NaN	NaN	NaN
ABT-199	DTX1	3.68818	0.831014	1.56068	30.7475
ABT-199	DUSP2	-16.7048	0.176108	1.69504	12.3276
ABT-199	EGR1	-5.58008	0.878312	1.50289	28.9843
ABT-199	EP300	-7.44241	0.811784	1.68939	33.2832
ABT-199	FGFR3	3.64833	0.450258	1.50739	24.7642
ABT-199	FUBP1	-10.8114	0.49991	1.42567	25.4954
ABT-199	HIST1H1B	NaN	NaN	NaN	NaN
ABT-199	HIST1H1D	-17.6643	0.172386	1.89624	12.2394
ABT-199	HIST1H1E	5.27758	0.409745	1.7528	24.5847
ABT-199	HIST1H2BK	NaN	NaN	NaN	NaN
ABT-199	HUWE1	8.72717	0.140389	2.16199	10.2484
ABT-199	IDH1	NaN	NaN	NaN	NaN
ABT-199	IDH2	NaN	NaN	NaN	NaN
ABT-199	IGLL5	-2.06019	0.414132	1.59441	24.0196
ABT-199	IRF4	-6.673	0.190124	1.46396	12.9284
ABT-199	KDM5C	NaN	NaN	NaN	NaN
ABT-199	KDM6A	-4.7525	0.785225	1.67951	32.9794
ABT-199	KLHL6	-0.876488	0.914387	1.46683	27.4316
ABT-199	KMT2B	6.77367	0.144135	1.84974	10.3777
ABT-199	KMT2C	-7.27286	0.46382	1.48809	25.0463
ABT-199	KRAS	-2.96336	0.180971	1.54831	12.487
ABT-199	LCE1D	NaN	NaN	NaN	NaN
ABT-199	LTB	-5.45441	0.812359	1.6461	32.4943
ABT-199	MAF	-2.19822	0.559558	1.48572	27.4184
ABT-199	MAFB	NaN	NaN	NaN	NaN
ABT-199	MAML2	2.73785	0.497178	1.47241	25.8533
ABT-199	MAN2C1	NaN	NaN	NaN	NaN
ABT-199	NCOR1	-15.6199	0.356069	1.82782	22.4323
ABT-199	NF1	0.0118488	0.872529	1.52693	29.666
ABT-199	NFKB2	-2.71176	0.989615	1.46539	25.73
ABT-199	NFKBIA	NaN	NaN	NaN	NaN
ABT-199	NRAS	5.14436	0.294362	1.74353	19.1336
ABT-199	PABPC1	NaN	NaN	NaN	NaN
ABT-199	PIK3CA	-5.02736	0.923632	1.45142	26.7853
ABT-199	PIM1	NaN	NaN	NaN	NaN
ABT-199	POT1	-6.86444	0.954478	1.44107	25.7709
ABT-199	PRDM1	-2.23684	0.856328	1.56993	30.8278
ABT-199	PRKD2	6.30663	0.386078	1.858	23.9369
ABT-199	PTPN11	1.67198	0.353653	1.94509	22.6338
ABT-199	RASA2	-1.09834	0.60503	1.41174	27.2264
ABT-199	RB1	-4.09033	0.822944	1.62479	32.0948
ABT-199	RFTN1	NaN	NaN	NaN	NaN
ABT-199	RPL10	3.06015	0.476927	1.46893	25.2771
ABT-199	RPL5	-6.68923	0.7004	1.54088	30.1172
ABT-199	RPRD1B	NaN	NaN	NaN	NaN
ABT-199	RPS3A	NaN	NaN	NaN	NaN
ABT-199	SAMHD1	NaN	NaN	NaN	NaN
ABT-199	SETD2	-15.6199	0.257188	1.65029	16.9744
ABT-199	SF3B1	-34.6364	0.00179134	0.137934	0.137934
ABT-199	SP140	2.98944	0.254169	1.77919	17.0294
ABT-199	TCL1A	NaN	NaN	NaN	NaN
ABT-199	TET2	-2.02386	0.859167	1.53851	30.0708
ABT-199	TGDS	-6.86444	0.447683	1.56689	25.0703
ABT-199	TP53	5.16573	0.0801349	3.08519	6.09025
ABT-199	TRAF2	-1.47798	0.594574	1.47685	27.945
ABT-199	TRAF3	-4.27477	0.911946	1.49404	28.2703
ABT-199	UBR5	-1.09834	0.524485	1.44233	26.2243
ABT-199	XBP1	NaN	NaN	NaN	NaN
ABT-199	ZFP36L1	NaN	NaN	NaN	NaN
ABT-199	ZNF292	-4.99265	0.897213	1.50186	28.7108
ADAVOSERTIB	ABCF1	NaN	NaN	NaN	NaN
ADAVOSERTIB	ACTG1	NaN	NaN	NaN	NaN
ADAVOSERTIB	ARID1A	NaN	NaN	NaN	NaN
ADAVOSERTIB	ARID2	NaN	NaN	NaN	NaN
ADAVOSERTIB	ATM	NaN	NaN	NaN	NaN
ADAVOSERTIB	ATRX	NaN	NaN	NaN	NaN
ADAVOSERTIB	BCL7A	NaN	NaN	NaN	NaN
ADAVOSERTIB	BHLHE41	NaN	NaN	NaN	NaN
ADAVOSERTIB	BRAF	NaN	NaN	NaN	NaN
ADAVOSERTIB	BTG1	NaN	NaN	NaN	NaN
ADAVOSERTIB	CCND1	NaN	NaN	NaN	NaN
ADAVOSERTIB	CDKN1B	NaN	NaN	NaN	NaN
ADAVOSERTIB	CDKN2C	NaN	NaN	NaN	NaN
ADAVOSERTIB	CREBBP	NaN	NaN	NaN	NaN
ADAVOSERTIB	CYLD	NaN	NaN	NaN	NaN
ADAVOSERTIB	DIS3	5.79128	0.622062	11.9747	46.0326
ADAVOSERTIB	DNMT3A	NaN	NaN	NaN	NaN
ADAVOSERTIB	DTX1	NaN	NaN	NaN	NaN
ADAVOSERTIB	DUSP2	NaN	NaN	NaN	NaN
ADAVOSERTIB	EGR1	NaN	NaN	NaN	NaN
ADAVOSERTIB	EP300	-5.96761	0.630629	9.71169	46.0359
ADAVOSERTIB	FGFR3	NaN	NaN	NaN	NaN
ADAVOSERTIB	FUBP1	NaN	NaN	NaN	NaN
ADAVOSERTIB	HIST1H1B	NaN	NaN	NaN	NaN
ADAVOSERTIB	HIST1H1D	NaN	NaN	NaN	NaN
ADAVOSERTIB	HIST1H1E	NaN	NaN	NaN	NaN
ADAVOSERTIB	HIST1H2BK	NaN	NaN	NaN	NaN
ADAVOSERTIB	HUWE1	NaN	NaN	NaN	NaN
ADAVOSERTIB	IDH1	NaN	NaN	NaN	NaN
ADAVOSERTIB	IDH2	NaN	NaN	NaN	NaN
ADAVOSERTIB	IGLL5	NaN	NaN	NaN	NaN
ADAVOSERTIB	IRF4	NaN	NaN	NaN	NaN
ADAVOSERTIB	KDM5C	NaN	NaN	NaN	NaN
ADAVOSERTIB	KDM6A	NaN	NaN	NaN	NaN
ADAVOSERTIB	KLHL6	NaN	NaN	NaN	NaN
ADAVOSERTIB	KMT2B	NaN	NaN	NaN	NaN
ADAVOSERTIB	KMT2C	NaN	NaN	NaN	NaN
ADAVOSERTIB	KRAS	13.1982	0.148948	5.73451	11.3201
ADAVOSERTIB	LCE1D	NaN	NaN	NaN	NaN
ADAVOSERTIB	LTB	NaN	NaN	NaN	NaN
ADAVOSERTIB	MAF	NaN	NaN	NaN	NaN
ADAVOSERTIB	MAFB	NaN	NaN	NaN	NaN
ADAVOSERTIB	MAML2	NaN	NaN	NaN	NaN
ADAVOSERTIB	MAN2C1	NaN	NaN	NaN	NaN
ADAVOSERTIB	NCOR1	NaN	NaN	NaN	NaN
ADAVOSERTIB	NF1	-16.2532	0.235226	6.03746	17.6419
ADAVOSERTIB	NFKB2	NaN	NaN	NaN	NaN
ADAVOSERTIB	NFKBIA	NaN	NaN	NaN	NaN
ADAVOSERTIB	NRAS	NaN	NaN	NaN	NaN
ADAVOSERTIB	PABPC1	NaN	NaN	NaN	NaN
ADAVOSERTIB	PIK3CA	NaN	NaN	NaN	NaN
ADAVOSERTIB	PIM1	NaN	NaN	NaN	NaN
ADAVOSERTIB	POT1	NaN	NaN	NaN	NaN
ADAVOSERTIB	PRDM1	-18.5554	0.142861	11.0003	11.0003
ADAVOSERTIB	PRKD2	NaN	NaN	NaN	NaN
ADAVOSERTIB	PTPN11	NaN	NaN	NaN	NaN
ADAVOSERTIB	RASA2	NaN	NaN	NaN	NaN
ADAVOSERTIB	RB1	NaN	NaN	NaN	NaN
ADAVOSERTIB	RFTN1	NaN	NaN	NaN	NaN
ADAVOSERTIB	RPL10	NaN	NaN	NaN	NaN
ADAVOSERTIB	RPL5	NaN	NaN	NaN	NaN
ADAVOSERTIB	RPRD1B	NaN	NaN	NaN	NaN
ADAVOSERTIB	RPS3A	NaN	NaN	NaN	NaN
ADAVOSERTIB	SAMHD1	NaN	NaN	NaN	NaN
ADAVOSERTIB	SETD2	NaN	NaN	NaN	NaN
ADAVOSERTIB	SF3B1	NaN	NaN	NaN	NaN
ADAVOSERTIB	SP140	NaN	NaN	NaN	NaN
ADAVOSERTIB	TCL1A	NaN	NaN	NaN	NaN
ADAVOSERTIB	TET2	NaN	NaN	NaN	NaN
ADAVOSERTIB	TGDS	NaN	NaN	NaN	NaN
ADAVOSERTIB	TP53	NaN	NaN	NaN	NaN
ADAVOSERTIB	TRAF2	NaN	NaN	NaN	NaN
ADAVOSERTIB	TRAF3	NaN	NaN	NaN	NaN
ADAVOSERTIB	UBR5	NaN	NaN	NaN	NaN
ADAVOSERTIB	XBP1	NaN	NaN	NaN	NaN
ADAVOSERTIB	ZFP36L1	NaN	NaN	NaN	NaN
ADAVOSERTIB	ZNF292	NaN	NaN	NaN	NaN
ALISERTIB	ABCF1	NaN	NaN	NaN	NaN
ALISERTIB	ACTG1	NaN	NaN	NaN	NaN
ALISERTIB	ARID1A	NaN	NaN	NaN	NaN
ALISERTIB	ARID2	NaN	NaN	NaN	NaN
ALISERTIB	ATM	NaN	NaN	NaN	NaN
ALISERTIB	ATRX	NaN	NaN	NaN	NaN
ALISERTIB	BCL7A	NaN	NaN	NaN	NaN
ALISERTIB	BHLHE41	NaN	NaN	NaN	NaN
ALISERTIB	BRAF	-4.14156	0.398162	7.66462	29.464
ALISERTIB	BTG1	NaN	NaN	NaN	NaN
ALISERTIB	CCND1	NaN	NaN	NaN	NaN
ALISERTIB	CDKN1B	NaN	NaN	NaN	NaN
ALISERTIB	CDKN2C	NaN	NaN	NaN	NaN
ALISERTIB	CREBBP	NaN	NaN	NaN	NaN
ALISERTIB	CYLD	-11.765	0.0430642	3.31595	3.31595
ALISERTIB	DIS3	-0.933345	0.793677	5.09276	52.3827
ALISERTIB	DNMT3A	NaN	NaN	NaN	NaN
ALISERTIB	DTX1	NaN	NaN	NaN	NaN
ALISERTIB	DUSP2	NaN	NaN	NaN	NaN
ALISERTIB	EGR1	NaN	NaN	NaN	NaN
ALISERTIB	EP300	NaN	NaN	NaN	NaN
ALISERTIB	FGFR3	NaN	NaN	NaN	NaN
ALISERTIB	FUBP1	NaN	NaN	NaN	NaN
ALISERTIB	HIST1H1B	NaN	NaN	NaN	NaN
ALISERTIB	HIST1H1D	NaN	NaN	NaN	NaN
ALISERTIB	HIST1H1E	NaN	NaN	NaN	NaN
ALISERTIB	HIST1H2BK	NaN	NaN	NaN	NaN
ALISERTIB	HUWE1	NaN	NaN	NaN	NaN
ALISERTIB	IDH1	NaN	NaN	NaN	NaN
ALISERTIB	IDH2	NaN	NaN	NaN	NaN
ALISERTIB	IGLL5	-0.650964	0.73673	5.67282	50.0976
ALISERTIB	IRF4	NaN	NaN	NaN	NaN
ALISERTIB	KDM5C	NaN	NaN	NaN	NaN
ALISERTIB	KDM6A	NaN	NaN	NaN	NaN
ALISERTIB	KLHL6	NaN	NaN	NaN	NaN
ALISERTIB	KMT2B	-1.12187	0.83228	4.92966	54.0982
ALISERTIB	KMT2C	-2.45813	0.8885	4.56097	55.9755
ALISERTIB	KRAS	4.23735	0.543758	5.23367	38.063
ALISERTIB	LCE1D	NaN	NaN	NaN	NaN
ALISERTIB	LTB	-0.127062	0.63467	5.42995	43.7922
ALISERTIB	MAF	NaN	NaN	NaN	NaN
ALISERTIB	MAFB	NaN	NaN	NaN	NaN
ALISERTIB	MAML2	NaN	NaN	NaN	NaN
ALISERTIB	MAN2C1	NaN	NaN	NaN	NaN
ALISERTIB	NCOR1	NaN	NaN	NaN	NaN
ALISERTIB	NF1	NaN	NaN	NaN	NaN
ALISERTIB	NFKB2	-1.29349	0.867745	4.7726	55.5357
ALISERTIB	NFKBIA	NaN	NaN	NaN	NaN
ALISERTIB	NRAS	-4.64942	0.765125	5.35588	51.2634
ALISERTIB	PABPC1	NaN	NaN	NaN	NaN
ALISERTIB	PIK3CA	NaN	NaN	NaN	NaN
ALISERTIB	PIM1	0.428161	0.533036	5.86339	37.8455
ALISERTIB	POT1	3.02939	0.445446	6.85987	32.5175
ALISERTIB	PRDM1	1.52696	0.470295	6.03545	33.8612
ALISERTIB	PRKD2	NaN	NaN	NaN	NaN
ALISERTIB	PTPN11	4.03003	0.23602	9.08679	17.9376
ALISERTIB	RASA2	NaN	NaN	NaN	NaN
ALISERTIB	RB1	NaN	NaN	NaN	NaN
ALISERTIB	RFTN1	NaN	NaN	NaN	NaN
ALISERTIB	RPL10	NaN	NaN	NaN	NaN
ALISERTIB	RPL5	NaN	NaN	NaN	NaN
ALISERTIB	RPRD1B	NaN	NaN	NaN	NaN
ALISERTIB	RPS3A	NaN	NaN	NaN	NaN
ALISERTIB	SAMHD1	NaN	NaN	NaN	NaN
ALISERTIB	SETD2	NaN	NaN	NaN	NaN
ALISERTIB	SF3B1	NaN	NaN	NaN	NaN
ALISERTIB	SP140	NaN	NaN	NaN	NaN
ALISERTIB	TCL1A	NaN	NaN	NaN	NaN
ALISERTIB	TET2	NaN	NaN	NaN	NaN
ALISERTIB	TGDS	NaN	NaN	NaN	NaN
ALISERTIB	TP53	NaN	NaN	NaN	NaN
ALISERTIB	TRAF2	NaN	NaN	NaN	NaN
ALISERTIB	TRAF3	NaN	NaN	NaN	NaN
ALISERTIB	UBR5	4.98356	0.257823	6.61746	19.3367
ALISERTIB	XBP1	NaN	NaN	NaN	NaN
ALISERTIB	ZFP36L1	NaN	NaN	NaN	NaN
ALISERTIB	ZNF292	NaN	NaN	NaN	NaN
AZ-628	ABCF1	NaN	NaN	NaN	NaN
AZ-628	ACTG1	NaN	NaN	NaN	NaN
AZ-628	ARID1A	-7.25513	0.537172	10.3406	39.7507
AZ-628	ARID2	NaN	NaN	NaN	NaN
AZ-628	ATM	NaN	NaN	NaN	NaN
AZ-628	ATRX	NaN	NaN	NaN	NaN
AZ-628	BCL7A	NaN	NaN	NaN	NaN
AZ-628	BHLHE41	NaN	NaN	NaN	NaN
AZ-628	BRAF	NaN	NaN	NaN	NaN
AZ-628	BTG1	NaN	NaN	NaN	NaN
AZ-628	CCND1	NaN	NaN	NaN	NaN
AZ-628	CDKN1B	NaN	NaN	NaN	NaN
AZ-628	CDKN2C	NaN	NaN	NaN	NaN
AZ-628	CREBBP	NaN	NaN	NaN	NaN
AZ-628	CYLD	5.4826	0.548761	8.45093	40.0596
AZ-628	DIS3	NaN	NaN	NaN	NaN
AZ-628	DNMT3A	NaN	NaN	NaN	NaN
AZ-628	DTX1	NaN	NaN	NaN	NaN
AZ-628	DUSP2	NaN	NaN	NaN	NaN
AZ-628	EGR1	NaN	NaN	NaN	NaN
AZ-628	EP300	NaN	NaN	NaN	NaN
AZ-628	FGFR3	NaN	NaN	NaN	NaN
AZ-628	FUBP1	NaN	NaN	NaN	NaN
AZ-628	HIST1H1B	NaN	NaN	NaN	NaN
AZ-628	HIST1H1D	NaN	NaN	NaN	NaN
AZ-628	HIST1H1E	-11.9996	0.144625	11.1362	11.1362
AZ-628	HIST1H2BK	NaN	NaN	NaN	NaN
AZ-628	HUWE1	NaN	NaN	NaN	NaN
AZ-628	IDH1	NaN	NaN	NaN	NaN
AZ-628	IDH2	NaN	NaN	NaN	NaN
AZ-628	IGLL5	2.12958	0.736207	9.44799	53.0069
AZ-628	IRF4	NaN	NaN	NaN	NaN
AZ-628	KDM5C	NaN	NaN	NaN	NaN
AZ-628	KDM6A	NaN	NaN	NaN	NaN
AZ-628	KLHL6	NaN	NaN	NaN	NaN
AZ-628	KMT2B	NaN	NaN	NaN	NaN
AZ-628	KMT2C	NaN	NaN	NaN	NaN
AZ-628	KRAS	-11.9996	0.144625	5.56808	10.9915
AZ-628	LCE1D	NaN	NaN	NaN	NaN
AZ-628	LTB	NaN	NaN	NaN	NaN
AZ-628	MAF	NaN	NaN	NaN	NaN
AZ-628	MAFB	NaN	NaN	NaN	NaN
AZ-628	MAML2	NaN	NaN	NaN	NaN
AZ-628	MAN2C1	NaN	NaN	NaN	NaN
AZ-628	NCOR1	NaN	NaN	NaN	NaN
AZ-628	NF1	NaN	NaN	NaN	NaN
AZ-628	NFKB2	NaN	NaN	NaN	NaN
AZ-628	NFKBIA	NaN	NaN	NaN	NaN
AZ-628	NRAS	NaN	NaN	NaN	NaN
AZ-628	PABPC1	NaN	NaN	NaN	NaN
AZ-628	PIK3CA	NaN	NaN	NaN	NaN
AZ-628	PIM1	NaN	NaN	NaN	NaN
AZ-628	POT1	NaN	NaN	NaN	NaN
AZ-628	PRDM1	NaN	NaN	NaN	NaN
AZ-628	PRKD2	-11.9996	0.144625	3.71205	10.8469
AZ-628	PTPN11	NaN	NaN	NaN	NaN
AZ-628	RASA2	NaN	NaN	NaN	NaN
AZ-628	RB1	NaN	NaN	NaN	NaN
AZ-628	RFTN1	NaN	NaN	NaN	NaN
AZ-628	RPL10	NaN	NaN	NaN	NaN
AZ-628	RPL5	NaN	NaN	NaN	NaN
AZ-628	RPRD1B	NaN	NaN	NaN	NaN
AZ-628	RPS3A	NaN	NaN	NaN	NaN
AZ-628	SAMHD1	NaN	NaN	NaN	NaN
AZ-628	SETD2	NaN	NaN	NaN	NaN
AZ-628	SF3B1	NaN	NaN	NaN	NaN
AZ-628	SP140	NaN	NaN	NaN	NaN
AZ-628	TCL1A	NaN	NaN	NaN	NaN
AZ-628	TET2	NaN	NaN	NaN	NaN
AZ-628	TGDS	NaN	NaN	NaN	NaN
AZ-628	TP53	NaN	NaN	NaN	NaN
AZ-628	TRAF2	NaN	NaN	NaN	NaN
AZ-628	TRAF3	NaN	NaN	NaN	NaN
AZ-628	UBR5	NaN	NaN	NaN	NaN
AZ-628	XBP1	NaN	NaN	NaN	NaN
AZ-628	ZFP36L1	NaN	NaN	NaN	NaN
AZ-628	ZNF292	NaN	NaN	NaN	NaN
AZD1480	ABCF1	NaN	NaN	NaN	NaN
AZD1480	ACTG1	NaN	NaN	NaN	NaN
AZD1480	ARID1A	NaN	NaN	NaN	NaN
AZD1480	ARID2	NaN	NaN	NaN	NaN
AZD1480	ATM	NaN	NaN	NaN	NaN
AZD1480	ATRX	NaN	NaN	NaN	NaN
AZD1480	BCL7A	NaN	NaN	NaN	NaN
AZD1480	BHLHE41	NaN	NaN	NaN	NaN
AZD1480	BRAF	1.68871	0.553549	7.10388	39.8555
AZD1480	BTG1	NaN	NaN	NaN	NaN
AZD1480	CCND1	NaN	NaN	NaN	NaN
AZD1480	CDKN1B	NaN	NaN	NaN	NaN
AZD1480	CDKN2C	NaN	NaN	NaN	NaN
AZD1480	CREBBP	NaN	NaN	NaN	NaN
AZD1480	CYLD	0.0603101	0.543654	8.37227	39.6868
AZD1480	DIS3	NaN	NaN	NaN	NaN
AZD1480	DNMT3A	NaN	NaN	NaN	NaN
AZD1480	DTX1	NaN	NaN	NaN	NaN
AZD1480	DUSP2	NaN	NaN	NaN	NaN
AZD1480	EGR1	NaN	NaN	NaN	NaN
AZD1480	EP300	NaN	NaN	NaN	NaN
AZD1480	FGFR3	NaN	NaN	NaN	NaN
AZD1480	FUBP1	NaN	NaN	NaN	NaN
AZD1480	HIST1H1B	NaN	NaN	NaN	NaN
AZD1480	HIST1H1D	NaN	NaN	NaN	NaN
AZD1480	HIST1H1E	NaN	NaN	NaN	NaN
AZD1480	HIST1H2BK	NaN	NaN	NaN	NaN
AZD1480	HUWE1	NaN	NaN	NaN	NaN
AZD1480	IDH1	NaN	NaN	NaN	NaN
AZD1480	IDH2	NaN	NaN	NaN	NaN
AZD1480	IGLL5	-6.25075	0.518533	13.309	38.89
AZD1480	IRF4	NaN	NaN	NaN	NaN
AZD1480	KDM5C	NaN	NaN	NaN	NaN
AZD1480	KDM6A	NaN	NaN	NaN	NaN
AZD1480	KLHL6	NaN	NaN	NaN	NaN
AZD1480	KMT2B	-3.27974	0.857189	8.25045	60.0032
AZD1480	KMT2C	NaN	NaN	NaN	NaN
AZD1480	KRAS	-0.797502	0.351372	13.5278	26.7043
AZD1480	LCE1D	NaN	NaN	NaN	NaN
AZD1480	LTB	-2.73194	0.989839	8.46862	68.2989
AZD1480	MAF	NaN	NaN	NaN	NaN
AZD1480	MAFB	NaN	NaN	NaN	NaN
AZD1480	MAML2	NaN	NaN	NaN	NaN
AZD1480	MAN2C1	NaN	NaN	NaN	NaN
AZD1480	NCOR1	NaN	NaN	NaN	NaN
AZD1480	NF1	NaN	NaN	NaN	NaN
AZD1480	NFKB2	NaN	NaN	NaN	NaN
AZD1480	NFKBIA	NaN	NaN	NaN	NaN
AZD1480	NRAS	-0.18872	0.69333	7.62663	49.2264
AZD1480	PABPC1	NaN	NaN	NaN	NaN
AZD1480	PIK3CA	NaN	NaN	NaN	NaN
AZD1480	PIM1	NaN	NaN	NaN	NaN
AZD1480	POT1	NaN	NaN	NaN	NaN
AZD1480	PRDM1	0.797502	0.540874	10.4118	40.0246
AZD1480	PRKD2	NaN	NaN	NaN	NaN
AZD1480	PTPN11	4.79293	0.212193	16.3389	16.3389
AZD1480	RASA2	NaN	NaN	NaN	NaN
AZD1480	RB1	NaN	NaN	NaN	NaN
AZD1480	RFTN1	NaN	NaN	NaN	NaN
AZD1480	RPL10	NaN	NaN	NaN	NaN
AZD1480	RPL5	NaN	NaN	NaN	NaN
AZD1480	RPRD1B	NaN	NaN	NaN	NaN
AZD1480	RPS3A	NaN	NaN	NaN	NaN
AZD1480	SAMHD1	NaN	NaN	NaN	NaN
AZD1480	SETD2	NaN	NaN	NaN	NaN
AZD1480	SF3B1	NaN	NaN	NaN	NaN
AZD1480	SP140	NaN	NaN	NaN	NaN
AZD1480	TCL1A	NaN	NaN	NaN	NaN
AZD1480	TET2	NaN	NaN	NaN	NaN
AZD1480	TGDS	NaN	NaN	NaN	NaN
AZD1480	TP53	NaN	NaN	NaN	NaN
AZD1480	TRAF2	NaN	NaN	NaN	NaN
AZD1480	TRAF3	NaN	NaN	NaN	NaN
AZD1480	UBR5	NaN	NaN	NaN	NaN
AZD1480	XBP1	NaN	NaN	NaN	NaN
AZD1480	ZFP36L1	NaN	NaN	NaN	NaN
AZD1480	ZNF292	NaN	NaN	NaN	NaN
AZD7762	ABCF1	NaN	NaN	NaN	NaN
AZD7762	ACTG1	NaN	NaN	NaN	NaN
AZD7762	ARID1A	NaN	NaN	NaN	NaN
AZD7762	ARID2	NaN	NaN	NaN	NaN
AZD7762	ATM	NaN	NaN	NaN	NaN
AZD7762	ATRX	NaN	NaN	NaN	NaN
AZD7762	BCL7A	NaN	NaN	NaN	NaN
AZD7762	BHLHE41	NaN	NaN	NaN	NaN
AZD7762	BRAF	NaN	NaN	NaN	NaN
AZD7762	BTG1	NaN	NaN	NaN	NaN
AZD7762	CCND1	NaN	NaN	NaN	NaN
AZD7762	CDKN1B	NaN	NaN	NaN	NaN
AZD7762	CDKN2C	NaN	NaN	NaN	NaN
AZD7762	CREBBP	NaN	NaN	NaN	NaN
AZD7762	CYLD	NaN	NaN	NaN	NaN
AZD7762	DIS3	-3.32447	0.801104	15.4213	59.2817
AZD7762	DNMT3A	NaN	NaN	NaN	NaN
AZD7762	DTX1	NaN	NaN	NaN	NaN
AZD7762	DUSP2	NaN	NaN	NaN	NaN
AZD7762	EGR1	NaN	NaN	NaN	NaN
AZD7762	EP300	-3.91725	0.757773	19.4495	56.833
AZD7762	FGFR3	NaN	NaN	NaN	NaN
AZD7762	FUBP1	NaN	NaN	NaN	NaN
AZD7762	HIST1H1B	NaN	NaN	NaN	NaN
AZD7762	HIST1H1D	NaN	NaN	NaN	NaN
AZD7762	HIST1H1E	NaN	NaN	NaN	NaN
AZD7762	HIST1H2BK	NaN	NaN	NaN	NaN
AZD7762	HUWE1	NaN	NaN	NaN	NaN
AZD7762	IDH1	NaN	NaN	NaN	NaN
AZD7762	IDH2	NaN	NaN	NaN	NaN
AZD7762	IGLL5	NaN	NaN	NaN	NaN
AZD7762	IRF4	NaN	NaN	NaN	NaN
AZD7762	KDM5C	NaN	NaN	NaN	NaN
AZD7762	KDM6A	NaN	NaN	NaN	NaN
AZD7762	KLHL6	NaN	NaN	NaN	NaN
AZD7762	KMT2B	NaN	NaN	NaN	NaN
AZD7762	KMT2C	NaN	NaN	NaN	NaN
AZD7762	KRAS	-3.32447	0.427975	32.9541	32.9541
AZD7762	LCE1D	NaN	NaN	NaN	NaN
AZD7762	LTB	NaN	NaN	NaN	NaN
AZD7762	MAF	NaN	NaN	NaN	NaN
AZD7762	MAFB	NaN	NaN	NaN	NaN
AZD7762	MAML2	NaN	NaN	NaN	NaN
AZD7762	MAN2C1	NaN	NaN	NaN	NaN
AZD7762	NCOR1	NaN	NaN	NaN	NaN
AZD7762	NF1	-0.592781	0.884567	13.6223	64.5734
AZD7762	NFKB2	NaN	NaN	NaN	NaN
AZD7762	NFKBIA	NaN	NaN	NaN	NaN
AZD7762	NRAS	NaN	NaN	NaN	NaN
AZD7762	PABPC1	NaN	NaN	NaN	NaN
AZD7762	PIK3CA	NaN	NaN	NaN	NaN
AZD7762	PIM1	NaN	NaN	NaN	NaN
AZD7762	POT1	NaN	NaN	NaN	NaN
AZD7762	PRDM1	-4.47064	0.749295	28.8479	56.9465
AZD7762	PRKD2	NaN	NaN	NaN	NaN
AZD7762	PTPN11	NaN	NaN	NaN	NaN
AZD7762	RASA2	NaN	NaN	NaN	NaN
AZD7762	RB1	NaN	NaN	NaN	NaN
AZD7762	RFTN1	NaN	NaN	NaN	NaN
AZD7762	RPL10	NaN	NaN	NaN	NaN
AZD7762	RPL5	NaN	NaN	NaN	NaN
AZD7762	RPRD1B	NaN	NaN	NaN	NaN
AZD7762	RPS3A	NaN	NaN	NaN	NaN
AZD7762	SAMHD1	NaN	NaN	NaN	NaN
AZD7762	SETD2	NaN	NaN	NaN	NaN
AZD7762	SF3B1	NaN	NaN	NaN	NaN
AZD7762	SP140	NaN	NaN	NaN	NaN
AZD7762	TCL1A	NaN	NaN	NaN	NaN
AZD7762	TET2	NaN	NaN	NaN	NaN
AZD7762	TGDS	NaN	NaN	NaN	NaN
AZD7762	TP53	NaN	NaN	NaN	NaN
AZD7762	TRAF2	NaN	NaN	NaN	NaN
AZD7762	TRAF3	NaN	NaN	NaN	NaN
AZD7762	UBR5	NaN	NaN	NaN	NaN
AZD7762	XBP1	NaN	NaN	NaN	NaN
AZD7762	ZFP36L1	NaN	NaN	NaN	NaN
AZD7762	ZNF292	NaN	NaN	NaN	NaN
BI2536	ABCF1	NaN	NaN	NaN	NaN
BI2536	ACTG1	NaN	NaN	NaN	NaN
BI2536	ARID1A	-1.34739	0.863619	3.32493	50.0899
BI2536	ARID2	-0.983439	0.907244	3.17536	50.8057
BI2536	ATM	NaN	NaN	NaN	NaN
BI2536	ATRX	-8.08649	0.426745	2.52764	27.7384
BI2536	BCL7A	NaN	NaN	NaN	NaN
BI2536	BHLHE41	NaN	NaN	NaN	NaN
BI2536	BRAF	10.8981	0.102747	2.63718	7.70604
BI2536	BTG1	NaN	NaN	NaN	NaN
BI2536	CCND1	NaN	NaN	NaN	NaN
BI2536	CDKN1B	NaN	NaN	NaN	NaN
BI2536	CDKN2C	NaN	NaN	NaN	NaN
BI2536	CREBBP	NaN	NaN	NaN	NaN
BI2536	CYLD	10.0764	0.395792	2.77054	26.518
BI2536	DIS3	5.91143	0.762022	3.08819	44.9593
BI2536	DNMT3A	NaN	NaN	NaN	NaN
BI2536	DTX1	NaN	NaN	NaN	NaN
BI2536	DUSP2	-10.0633	0.501685	2.57532	31.6061
BI2536	EGR1	0.105424	0.942053	3.15383	51.8129
BI2536	EP300	-0.50944	0.899288	3.29739	51.2594
BI2536	FGFR3	19.9666	0.095892	3.69184	7.28779
BI2536	FUBP1	NaN	NaN	NaN	NaN
BI2536	HIST1H1B	NaN	NaN	NaN	NaN
BI2536	HIST1H1D	NaN	NaN	NaN	NaN
BI2536	HIST1H1E	NaN	NaN	NaN	NaN
BI2536	HIST1H2BK	NaN	NaN	NaN	NaN
BI2536	HUWE1	NaN	NaN	NaN	NaN
BI2536	IDH1	NaN	NaN	NaN	NaN
BI2536	IDH2	NaN	NaN	NaN	NaN
BI2536	IGLL5	-14.5021	0.0318002	2.44861	2.44861
BI2536	IRF4	NaN	NaN	NaN	NaN
BI2536	KDM5C	NaN	NaN	NaN	NaN
BI2536	KDM6A	11.2942	0.360576	2.77644	24.5192
BI2536	KLHL6	NaN	NaN	NaN	NaN
BI2536	KMT2B	-8.15897	0.438425	2.41134	28.0592
BI2536	KMT2C	8.4946	0.254718	2.45166	17.8303
BI2536	KRAS	1.61657	0.175856	2.70819	12.8375
BI2536	LCE1D	NaN	NaN	NaN	NaN
BI2536	LTB	15.6975	0.189042	2.42604	13.611
BI2536	MAF	NaN	NaN	NaN	NaN
BI2536	MAFB	NaN	NaN	NaN	NaN
BI2536	MAML2	NaN	NaN	NaN	NaN
BI2536	MAN2C1	NaN	NaN	NaN	NaN
BI2536	NCOR1	NaN	NaN	NaN	NaN
BI2536	NF1	NaN	NaN	NaN	NaN
BI2536	NFKB2	NaN	NaN	NaN	NaN
BI2536	NFKBIA	NaN	NaN	NaN	NaN
BI2536	NRAS	-10.0633	0.992153	3.05583	52.5841
BI2536	PABPC1	NaN	NaN	NaN	NaN
BI2536	PIK3CA	NaN	NaN	NaN	NaN
BI2536	PIM1	NaN	NaN	NaN	NaN
BI2536	POT1	NaN	NaN	NaN	NaN
BI2536	PRDM1	-12.4631	0.24743	2.72173	17.5675
BI2536	PRKD2	NaN	NaN	NaN	NaN
BI2536	PTPN11	-8.7058	0.411715	2.64184	27.1732
BI2536	RASA2	0.00882687	0.726381	3.1073	43.5829
BI2536	RB1	NaN	NaN	NaN	NaN
BI2536	RFTN1	NaN	NaN	NaN	NaN
BI2536	RPL10	NaN	NaN	NaN	NaN
BI2536	RPL5	NaN	NaN	NaN	NaN
BI2536	RPRD1B	NaN	NaN	NaN	NaN
BI2536	RPS3A	NaN	NaN	NaN	NaN
BI2536	SAMHD1	NaN	NaN	NaN	NaN
BI2536	SETD2	NaN	NaN	NaN	NaN
BI2536	SF3B1	NaN	NaN	NaN	NaN
BI2536	SP140	NaN	NaN	NaN	NaN
BI2536	TCL1A	NaN	NaN	NaN	NaN
BI2536	TET2	-15.0436	0.153981	2.96414	11.3946
BI2536	TGDS	NaN	NaN	NaN	NaN
BI2536	TP53	-0.653089	0.638432	2.89172	38.9443
BI2536	TRAF2	NaN	NaN	NaN	NaN
BI2536	TRAF3	-10.5872	0.308289	2.63758	21.2719
BI2536	UBR5	1.36113	0.979537	3.14268	52.895
BI2536	XBP1	NaN	NaN	NaN	NaN
BI2536	ZFP36L1	NaN	NaN	NaN	NaN
BI2536	ZNF292	-6.34464	0.522151	2.51285	32.3734
BMS754807	ABCF1	NaN	NaN	NaN	NaN
BMS754807	ACTG1	NaN	NaN	NaN	NaN
BMS754807	ARID1A	NaN	NaN	NaN	NaN
BMS754807	ARID2	NaN	NaN	NaN	NaN
BMS754807	ATM	NaN	NaN	NaN	NaN
BMS754807	ATRX	NaN	NaN	NaN	NaN
BMS754807	BCL7A	NaN	NaN	NaN	NaN
BMS754807	BHLHE41	NaN	NaN	NaN	NaN
BMS754807	BRAF	8.62025	0.0935935	3.60335	7.1131
BMS754807	BTG1	NaN	NaN	NaN	NaN
BMS754807	CCND1	NaN	NaN	NaN	NaN
BMS754807	CDKN1B	NaN	NaN	NaN	NaN
BMS754807	CDKN2C	NaN	NaN	NaN	NaN
BMS754807	CREBBP	NaN	NaN	NaN	NaN
BMS754807	CYLD	4.47155	0.39884	3.83884	27.9188
BMS754807	DIS3	NaN	NaN	NaN	NaN
BMS754807	DNMT3A	NaN	NaN	NaN	NaN
BMS754807	DTX1	NaN	NaN	NaN	NaN
BMS754807	DUSP2	NaN	NaN	NaN	NaN
BMS754807	EGR1	NaN	NaN	NaN	NaN
BMS754807	EP300	NaN	NaN	NaN	NaN
BMS754807	FGFR3	NaN	NaN	NaN	NaN
BMS754807	FUBP1	NaN	NaN	NaN	NaN
BMS754807	HIST1H1B	NaN	NaN	NaN	NaN
BMS754807	HIST1H1D	NaN	NaN	NaN	NaN
BMS754807	HIST1H1E	NaN	NaN	NaN	NaN
BMS754807	HIST1H2BK	NaN	NaN	NaN	NaN
BMS754807	HUWE1	NaN	NaN	NaN	NaN
BMS754807	IDH1	NaN	NaN	NaN	NaN
BMS754807	IDH2	NaN	NaN	NaN	NaN
BMS754807	IGLL5	-7.4044	0.177994	4.56851	13.3495
BMS754807	IRF4	NaN	NaN	NaN	NaN
BMS754807	KDM5C	NaN	NaN	NaN	NaN
BMS754807	KDM6A	NaN	NaN	NaN	NaN
BMS754807	KLHL6	NaN	NaN	NaN	NaN
BMS754807	KMT2B	-3.6804	0.369228	4.73843	26.5844
BMS754807	KMT2C	NaN	NaN	NaN	NaN
BMS754807	KRAS	4.88765	0.297889	4.58749	21.7459
BMS754807	LCE1D	NaN	NaN	NaN	NaN
BMS754807	LTB	5.11297	0.429	3.67034	29.601
BMS754807	MAF	NaN	NaN	NaN	NaN
BMS754807	MAFB	NaN	NaN	NaN	NaN
BMS754807	MAML2	NaN	NaN	NaN	NaN
BMS754807	MAN2C1	NaN	NaN	NaN	NaN
BMS754807	NCOR1	NaN	NaN	NaN	NaN
BMS754807	NF1	NaN	NaN	NaN	NaN
BMS754807	NFKB2	NaN	NaN	NaN	NaN
BMS754807	NFKBIA	NaN	NaN	NaN	NaN
BMS754807	NRAS	-7.06662	0.202391	3.89603	14.9769
BMS754807	PABPC1	NaN	NaN	NaN	NaN
BMS754807	PIK3CA	NaN	NaN	NaN	NaN
BMS754807	PIM1	NaN	NaN	NaN	NaN
BMS754807	POT1	NaN	NaN	NaN	NaN
BMS754807	PRDM1	-5.71649	0.0647234	4.9837	4.9837
BMS754807	PRKD2	NaN	NaN	NaN	NaN
BMS754807	PTPN11	-5.11625	0.381964	4.20161	27.1195
BMS754807	RASA2	NaN	NaN	NaN	NaN
BMS754807	RB1	NaN	NaN	NaN	NaN
BMS754807	RFTN1	NaN	NaN	NaN	NaN
BMS754807	RPL10	NaN	NaN	NaN	NaN
BMS754807	RPL5	NaN	NaN	NaN	NaN
BMS754807	RPRD1B	NaN	NaN	NaN	NaN
BMS754807	RPS3A	NaN	NaN	NaN	NaN
BMS754807	SAMHD1	NaN	NaN	NaN	NaN
BMS754807	SETD2	NaN	NaN	NaN	NaN
BMS754807	SF3B1	NaN	NaN	NaN	NaN
BMS754807	SP140	NaN	NaN	NaN	NaN
BMS754807	TCL1A	NaN	NaN	NaN	NaN
BMS754807	TET2	NaN	NaN	NaN	NaN
BMS754807	TGDS	NaN	NaN	NaN	NaN
BMS754807	TP53	NaN	NaN	NaN	NaN
BMS754807	TRAF2	NaN	NaN	NaN	NaN
BMS754807	TRAF3	NaN	NaN	NaN	NaN
BMS754807	UBR5	NaN	NaN	NaN	NaN
BMS754807	XBP1	NaN	NaN	NaN	NaN
BMS754807	ZFP36L1	NaN	NaN	NaN	NaN
BMS754807	ZNF292	NaN	NaN	NaN	NaN
BMS777607	ABCF1	NaN	NaN	NaN	NaN
BMS777607	ACTG1	NaN	NaN	NaN	NaN
BMS777607	ARID1A	NaN	NaN	NaN	NaN
BMS777607	ARID2	NaN	NaN	NaN	NaN
BMS777607	ATM	NaN	NaN	NaN	NaN
BMS777607	ATRX	NaN	NaN	NaN	NaN
BMS777607	BCL7A	NaN	NaN	NaN	NaN
BMS777607	BHLHE41	NaN	NaN	NaN	NaN
BMS777607	BRAF	0.975994	0.308281	23.7376	23.7376
BMS777607	BTG1	NaN	NaN	NaN	NaN
BMS777607	CCND1	NaN	NaN	NaN	NaN
BMS777607	CDKN1B	NaN	NaN	NaN	NaN
BMS777607	CDKN2C	NaN	NaN	NaN	NaN
BMS777607	CREBBP	NaN	NaN	NaN	NaN
BMS777607	CYLD	0.952853	0.324231	12.4829	24.6415
BMS777607	DIS3	NaN	NaN	NaN	NaN
BMS777607	DNMT3A	NaN	NaN	NaN	NaN
BMS777607	DTX1	NaN	NaN	NaN	NaN
BMS777607	DUSP2	NaN	NaN	NaN	NaN
BMS777607	EGR1	NaN	NaN	NaN	NaN
BMS777607	EP300	NaN	NaN	NaN	NaN
BMS777607	FGFR3	NaN	NaN	NaN	NaN
BMS777607	FUBP1	NaN	NaN	NaN	NaN
BMS777607	HIST1H1B	NaN	NaN	NaN	NaN
BMS777607	HIST1H1D	NaN	NaN	NaN	NaN
BMS777607	HIST1H1E	NaN	NaN	NaN	NaN
BMS777607	HIST1H2BK	NaN	NaN	NaN	NaN
BMS777607	HUWE1	NaN	NaN	NaN	NaN
BMS777607	IDH1	NaN	NaN	NaN	NaN
BMS777607	IDH2	NaN	NaN	NaN	NaN
BMS777607	IGLL5	NaN	NaN	NaN	NaN
BMS777607	IRF4	NaN	NaN	NaN	NaN
BMS777607	KDM5C	NaN	NaN	NaN	NaN
BMS777607	KDM6A	NaN	NaN	NaN	NaN
BMS777607	KLHL6	NaN	NaN	NaN	NaN
BMS777607	KMT2B	NaN	NaN	NaN	NaN
BMS777607	KMT2C	NaN	NaN	NaN	NaN
BMS777607	KRAS	-0.457329	0.636229	16.3299	47.7172
BMS777607	LCE1D	NaN	NaN	NaN	NaN
BMS777607	LTB	NaN	NaN	NaN	NaN
BMS777607	MAF	NaN	NaN	NaN	NaN
BMS777607	MAFB	NaN	NaN	NaN	NaN
BMS777607	MAML2	NaN	NaN	NaN	NaN
BMS777607	MAN2C1	NaN	NaN	NaN	NaN
BMS777607	NCOR1	NaN	NaN	NaN	NaN
BMS777607	NF1	NaN	NaN	NaN	NaN
BMS777607	NFKB2	NaN	NaN	NaN	NaN
BMS777607	NFKBIA	NaN	NaN	NaN	NaN
BMS777607	NRAS	NaN	NaN	NaN	NaN
BMS777607	PABPC1	NaN	NaN	NaN	NaN
BMS777607	PIK3CA	NaN	NaN	NaN	NaN
BMS777607	PIM1	NaN	NaN	NaN	NaN
BMS777607	POT1	NaN	NaN	NaN	NaN
BMS777607	PRDM1	NaN	NaN	NaN	NaN
BMS777607	PRKD2	NaN	NaN	NaN	NaN
BMS777607	PTPN11	NaN	NaN	NaN	NaN
BMS777607	RASA2	NaN	NaN	NaN	NaN
BMS777607	RB1	NaN	NaN	NaN	NaN
BMS777607	RFTN1	NaN	NaN	NaN	NaN
BMS777607	RPL10	NaN	NaN	NaN	NaN
BMS777607	RPL5	NaN	NaN	NaN	NaN
BMS777607	RPRD1B	NaN	NaN	NaN	NaN
BMS777607	RPS3A	NaN	NaN	NaN	NaN
BMS777607	SAMHD1	NaN	NaN	NaN	NaN
BMS777607	SETD2	NaN	NaN	NaN	NaN
BMS777607	SF3B1	NaN	NaN	NaN	NaN
BMS777607	SP140	NaN	NaN	NaN	NaN
BMS777607	TCL1A	NaN	NaN	NaN	NaN
BMS777607	TET2	NaN	NaN	NaN	NaN
BMS777607	TGDS	NaN	NaN	NaN	NaN
BMS777607	TP53	NaN	NaN	NaN	NaN
BMS777607	TRAF2	NaN	NaN	NaN	NaN
BMS777607	TRAF3	NaN	NaN	NaN	NaN
BMS777607	UBR5	NaN	NaN	NaN	NaN
BMS777607	XBP1	NaN	NaN	NaN	NaN
BMS777607	ZFP36L1	NaN	NaN	NaN	NaN
BMS777607	ZNF292	NaN	NaN	NaN	NaN
BTZ	ABCF1	-7.04844	0.372931	0.844579	16.409
BTZ	ACTG1	-9.76098	0.657837	1.03374	19.0773
BTZ	ARID1A	-0.8788	0.795933	1.11431	18.3065
BTZ	ARID2	9.2388	0.995719	1.1275	9.95719
BTZ	ATM	5.36258	0.660749	1.01755	18.501
BTZ	ATRX	3.25235	0.457113	0.879942	17.3703
BTZ	BCL7A	-11.4533	0.0348637	0.671126	2.57991
BTZ	BHLHE41	17.5754	0.0479127	0.737856	3.49763
BTZ	BRAF	3.59929	0.55853	0.93493	17.873
BTZ	BTG1	-1.17727	0.93912	1.12988	13.1477
BTZ	CCND1	5.81669	0.176644	0.850101	10.9519
BTZ	CDKN1B	3.62714	0.271207	0.803189	14.1028
BTZ	CDKN2C	NaN	NaN	NaN	NaN
BTZ	CREBBP	-11.481	0.0815189	0.697439	5.6248
BTZ	CYLD	18.1139	5.46696e-05	0.00420956	0.00420956
BTZ	DIS3	-2.37293	0.759449	1.12457	19.7457
BTZ	DNMT3A	NaN	NaN	NaN	NaN
BTZ	DTX1	12.8131	0.361675	0.843908	16.2754
BTZ	DUSP2	-2.60455	0.791779	1.12902	19.0027
BTZ	EGR1	4.52363	0.328021	0.814762	15.417
BTZ	EP300	6.47477	0.254017	0.81497	13.7169
BTZ	FGFR3	-3.16208	0.930922	1.13779	13.9638
BTZ	FUBP1	-11.0005	0.1075	0.752499	7.20249
BTZ	HIST1H1B	NaN	NaN	NaN	NaN
BTZ	HIST1H1D	-11.0469	0.0538193	0.690681	3.87499
BTZ	HIST1H1E	-1.74855	0.318982	0.818721	15.3111
BTZ	HIST1H2BK	-4.84832	0.527354	0.92287	17.93
BTZ	HUWE1	13.0132	0.383741	0.844231	16.5009
BTZ	IDH1	4.50641	0.518172	0.927889	18.136
BTZ	IDH2	NaN	NaN	NaN	NaN
BTZ	IGLL5	3.43562	0.97012	1.11491	10.6713
BTZ	IRF4	3.43562	0.148153	0.760519	9.33364
BTZ	KDM5C	-7.79266	0.43609	0.883656	17.4436
BTZ	KDM6A	-5.58288	0.139767	0.76872	8.9451
BTZ	KLHL6	2.20225	0.873709	1.14026	16.6005
BTZ	KMT2B	3.41418	0.497162	0.933694	18.395
BTZ	KMT2C	4.94822	0.454875	0.898087	17.7401
BTZ	KRAS	-2.39052	0.595492	0.975594	18.4603
BTZ	LCE1D	NaN	NaN	NaN	NaN
BTZ	LTB	-5.31648	0.880337	1.12977	15.8461
BTZ	MAF	-5.16097	0.944704	1.11911	12.2811
BTZ	MAFB	11.154	0.223433	0.819256	12.7357
BTZ	MAML2	6.90004	0.347626	0.836476	15.9908
BTZ	MAN2C1	-5.91623	0.420594	0.87529	17.2444
BTZ	NCOR1	14.3167	0.0903392	0.695612	6.14307
BTZ	NF1	-3.93099	0.851456	1.13038	17.0291
BTZ	NFKB2	-3.32185	0.774421	1.1251	19.3605
BTZ	NFKBIA	8.89962	0.239206	0.837222	13.3956
BTZ	NRAS	-4.06817	0.220166	0.84764	12.7696
BTZ	PABPC1	NaN	NaN	NaN	NaN
BTZ	PIK3CA	4.73999	0.402558	0.861028	16.9075
BTZ	PIM1	3.28906	0.920412	1.14309	14.7266
BTZ	POT1	-7.94871	0.206071	0.835132	12.1582
BTZ	PRDM1	-14.9201	0.000676029	0.0260271	0.0513782
BTZ	PRKD2	-5.81392	0.0639399	0.615421	4.47579
BTZ	PTPN11	-4.46603	0.61599	0.988151	18.4797
BTZ	RASA2	-2.55354	0.515986	0.945974	18.5755
BTZ	RB1	0.654664	0.537872	0.920359	17.7498
BTZ	RFTN1	-14.3803	0.270553	0.833303	14.3393
BTZ	RPL10	2.15343	0.832473	1.12457	17.4819
BTZ	RPL5	14.3167	0.0295073	0.757355	2.21305
BTZ	RPRD1B	-12.674	0.280354	0.799528	14.298
BTZ	RPS3A	-4.29575	0.955248	1.11446	11.463
BTZ	SAMHD1	6.35468	0.176889	0.801202	10.7902
BTZ	SETD2	-7.93378	0.252885	0.846616	13.9087
BTZ	SF3B1	0.292854	0.898361	1.134	15.2721
BTZ	SP140	-2.76369	0.692741	1.0459	18.704
BTZ	TCL1A	NaN	NaN	NaN	NaN
BTZ	TET2	8.09911	0.0542955	0.597251	3.85498
BTZ	TGDS	5.09238	0.196124	0.838975	11.7674
BTZ	TP53	1.1667	0.822488	1.13092	18.0947
BTZ	TRAF2	11.6552	0.123051	0.72884	7.99831
BTZ	TRAF3	-3.2096	0.28663	0.761053	14.0449
BTZ	UBR5	9.08853	0.284325	0.781895	14.2163
BTZ	XBP1	NaN	NaN	NaN	NaN
BTZ	ZFP36L1	NaN	NaN	NaN	NaN
BTZ	ZNF292	8.47841	0.119641	0.767695	7.8963
CFZ	ABCF1	-18.8174	0.0588912	0.412238	3.94571
CFZ	ACTG1	12.3055	0.093105	0.477939	5.86561
CFZ	ARID1A	-3.02106	0.550915	0.865724	15.9765
CFZ	ARID2	-8.93556	0.0746586	0.442208	4.85281
CFZ	ATM	-1.32666	0.706501	0.989102	16.2495
CFZ	ATRX	4.40397	0.448802	0.909414	17.9521
CFZ	BCL7A	-9.46281	0.0150093	0.19262	1.08067
CFZ	BHLHE41	6.83052	0.560348	0.846016	15.1294
CFZ	BRAF	4.03999	0.134842	0.576823	8.0905
CFZ	BTG1	0.545599	0.8992	1.09902	13.488
CFZ	CCND1	1.78784	0.453207	0.851145	16.7687
CFZ	CDKN1B	5.15181	0.191264	0.7013	10.902
CFZ	CDKN2C	NaN	NaN	NaN	NaN
CFZ	CREBBP	-3.82041	0.660965	0.942487	15.8632
CFZ	CYLD	10.9753	0.0706289	0.453202	4.66151
CFZ	DIS3	-3.34032	0.767817	1.03723	16.1242
CFZ	DNMT3A	NaN	NaN	NaN	NaN
CFZ	DTX1	12.0145	0.489141	0.81878	15.6525
CFZ	DUSP2	0.656642	0.339205	0.816212	15.6034
CFZ	EGR1	8.61365	0.286048	0.734189	13.7303
CFZ	EP300	0.486613	0.516978	0.846963	16.0263
CFZ	FGFR3	-0.143323	0.259249	0.739338	13.2217
CFZ	FUBP1	-7.61246	0.346562	0.808645	15.5953
CFZ	HIST1H1B	NaN	NaN	NaN	NaN
CFZ	HIST1H1D	-18.9522	0.00704366	0.180787	0.528275
CFZ	HIST1H1E	0.41536	0.279274	0.74152	13.6844
CFZ	HIST1H2BK	-18.9522	0.0114286	0.176001	0.834291
CFZ	HUWE1	13.2588	0.0340459	0.327692	2.38321
CFZ	IDH1	-0.390284	0.853126	1.05953	13.65
CFZ	IDH2	NaN	NaN	NaN	NaN
CFZ	IGLL5	0.312835	0.256726	0.760303	13.3497
CFZ	IRF4	1.97927	0.559187	0.861148	15.6572
CFZ	KDM5C	-2.80492	0.99611	1.14478	10.9572
CFZ	KDM6A	-2.48461	0.0386836	0.297863	2.63048
CFZ	KLHL6	6.57642	0.733015	1.0079	16.1263
CFZ	KMT2B	10.3988	0.432268	0.899585	17.723
CFZ	KMT2C	1.14077	0.920192	1.10711	12.8827
CFZ	KRAS	-2.18265	0.165892	0.638684	9.62173
CFZ	LCE1D	NaN	NaN	NaN	NaN
CFZ	LTB	5.88678	0.161012	0.652522	9.4997
CFZ	MAF	1.79038	0.471922	0.845069	16.5173
CFZ	MAFB	NaN	NaN	NaN	NaN
CFZ	MAML2	9.22134	0.472254	0.826444	16.0566
CFZ	MAN2C1	-10.1055	0.468948	0.859738	16.8821
CFZ	NCOR1	6.12648	0.820142	1.08881	16.4028
CFZ	NF1	-4.11965	0.40317	0.862336	16.9331
CFZ	NFKB2	-0.846595	0.822607	1.07357	15.6295
CFZ	NFKBIA	9.89396	0.198517	0.664601	10.9184
CFZ	NRAS	-3.83681	0.384052	0.869764	16.8983
CFZ	PABPC1	NaN	NaN	NaN	NaN
CFZ	PIK3CA	9.46452	0.226501	0.697624	12.0046
CFZ	PIM1	4.62584	0.926627	1.0977	12.0461
CFZ	POT1	-4.22829	0.259899	0.714722	12.9949
CFZ	PRDM1	-15.5615	0.000228337	0.0175819	0.0175819
CFZ	PRKD2	-1.20107	0.449112	0.886708	17.5154
CFZ	PTPN11	1.44558	0.4494	0.865095	17.0772
CFZ	RASA2	-2.86538	0.47676	0.815789	15.7331
CFZ	RB1	-2.90998	0.396437	0.872161	17.0468
CFZ	RFTN1	-13.8552	0.337877	0.839244	15.8802
CFZ	RPL10	-1.00029	0.527479	0.846164	15.8244
CFZ	RPL5	8.2991	0.0385644	0.32994	2.66095
CFZ	RPRD1B	-15.9072	0.196353	0.687234	10.9957
CFZ	RPS3A	-4.06054	0.845576	1.06737	14.3748
CFZ	SAMHD1	-2.90998	0.56494	0.836545	14.6884
CFZ	SETD2	-6.04636	0.116604	0.561157	7.22946
CFZ	SF3B1	1.78032	0.824728	1.0584	14.8451
CFZ	SP140	-5.45002	0.127577	0.577848	7.78219
CFZ	TCL1A	NaN	NaN	NaN	NaN
CFZ	TET2	9.89912	0.00918198	0.176753	0.679466
CFZ	TGDS	15.5709	0.0066824	0.257272	0.507863
CFZ	TP53	-0.0167637	0.942025	1.09903	11.3043
CFZ	TRAF2	14.824	0.0773124	0.425218	4.94799
CFZ	TRAF3	-2.9119	0.571757	0.830666	14.2939
CFZ	UBR5	8.533	0.218086	0.699693	11.7766
CFZ	XBP1	NaN	NaN	NaN	NaN
CFZ	ZFP36L1	NaN	NaN	NaN	NaN
CFZ	ZNF292	12.25	0.0221798	0.243977	1.57476
CGP-60474	ABCF1	NaN	NaN	NaN	NaN
CGP-60474	ACTG1	NaN	NaN	NaN	NaN
CGP-60474	ARID1A	-9.46005	0.455608	7.01636	33.2594
CGP-60474	ARID2	NaN	NaN	NaN	NaN
CGP-60474	ATM	NaN	NaN	NaN	NaN
CGP-60474	ATRX	NaN	NaN	NaN	NaN
CGP-60474	BCL7A	NaN	NaN	NaN	NaN
CGP-60474	BHLHE41	NaN	NaN	NaN	NaN
CGP-60474	BRAF	NaN	NaN	NaN	NaN
CGP-60474	BTG1	NaN	NaN	NaN	NaN
CGP-60474	CCND1	NaN	NaN	NaN	NaN
CGP-60474	CDKN1B	NaN	NaN	NaN	NaN
CGP-60474	CDKN2C	NaN	NaN	NaN	NaN
CGP-60474	CREBBP	NaN	NaN	NaN	NaN
CGP-60474	CYLD	14.8829	0.352153	6.77895	26.0593
CGP-60474	DIS3	NaN	NaN	NaN	NaN
CGP-60474	DNMT3A	NaN	NaN	NaN	NaN
CGP-60474	DTX1	NaN	NaN	NaN	NaN
CGP-60474	DUSP2	NaN	NaN	NaN	NaN
CGP-60474	EGR1	NaN	NaN	NaN	NaN
CGP-60474	EP300	NaN	NaN	NaN	NaN
CGP-60474	FGFR3	NaN	NaN	NaN	NaN
CGP-60474	FUBP1	NaN	NaN	NaN	NaN
CGP-60474	HIST1H1B	NaN	NaN	NaN	NaN
CGP-60474	HIST1H1D	NaN	NaN	NaN	NaN
CGP-60474	HIST1H1E	-16.3407	0.172069	13.2493	13.2493
CGP-60474	HIST1H2BK	NaN	NaN	NaN	NaN
CGP-60474	HUWE1	NaN	NaN	NaN	NaN
CGP-60474	IDH1	NaN	NaN	NaN	NaN
CGP-60474	IDH2	NaN	NaN	NaN	NaN
CGP-60474	IGLL5	1.78345	0.766953	9.84256	55.2206
CGP-60474	IRF4	NaN	NaN	NaN	NaN
CGP-60474	KDM5C	NaN	NaN	NaN	NaN
CGP-60474	KDM6A	NaN	NaN	NaN	NaN
CGP-60474	KLHL6	NaN	NaN	NaN	NaN
CGP-60474	KMT2B	NaN	NaN	NaN	NaN
CGP-60474	KMT2C	NaN	NaN	NaN	NaN
CGP-60474	KRAS	-16.3407	0.172069	6.62467	13.0773
CGP-60474	LCE1D	NaN	NaN	NaN	NaN
CGP-60474	LTB	NaN	NaN	NaN	NaN
CGP-60474	MAF	NaN	NaN	NaN	NaN
CGP-60474	MAFB	NaN	NaN	NaN	NaN
CGP-60474	MAML2	NaN	NaN	NaN	NaN
CGP-60474	MAN2C1	NaN	NaN	NaN	NaN
CGP-60474	NCOR1	NaN	NaN	NaN	NaN
CGP-60474	NF1	NaN	NaN	NaN	NaN
CGP-60474	NFKB2	NaN	NaN	NaN	NaN
CGP-60474	NFKBIA	NaN	NaN	NaN	NaN
CGP-60474	NRAS	NaN	NaN	NaN	NaN
CGP-60474	PABPC1	NaN	NaN	NaN	NaN
CGP-60474	PIK3CA	NaN	NaN	NaN	NaN
CGP-60474	PIM1	NaN	NaN	NaN	NaN
CGP-60474	POT1	NaN	NaN	NaN	NaN
CGP-60474	PRDM1	NaN	NaN	NaN	NaN
CGP-60474	PRKD2	-16.3407	0.172069	4.41645	12.9052
CGP-60474	PTPN11	NaN	NaN	NaN	NaN
CGP-60474	RASA2	NaN	NaN	NaN	NaN
CGP-60474	RB1	NaN	NaN	NaN	NaN
CGP-60474	RFTN1	NaN	NaN	NaN	NaN
CGP-60474	RPL10	NaN	NaN	NaN	NaN
CGP-60474	RPL5	NaN	NaN	NaN	NaN
CGP-60474	RPRD1B	NaN	NaN	NaN	NaN
CGP-60474	RPS3A	NaN	NaN	NaN	NaN
CGP-60474	SAMHD1	NaN	NaN	NaN	NaN
CGP-60474	SETD2	NaN	NaN	NaN	NaN
CGP-60474	SF3B1	NaN	NaN	NaN	NaN
CGP-60474	SP140	NaN	NaN	NaN	NaN
CGP-60474	TCL1A	NaN	NaN	NaN	NaN
CGP-60474	TET2	NaN	NaN	NaN	NaN
CGP-60474	TGDS	NaN	NaN	NaN	NaN
CGP-60474	TP53	NaN	NaN	NaN	NaN
CGP-60474	TRAF2	NaN	NaN	NaN	NaN
CGP-60474	TRAF3	NaN	NaN	NaN	NaN
CGP-60474	UBR5	NaN	NaN	NaN	NaN
CGP-60474	XBP1	NaN	NaN	NaN	NaN
CGP-60474	ZFP36L1	NaN	NaN	NaN	NaN
CGP-60474	ZNF292	NaN	NaN	NaN	NaN
CPD22	ABCF1	NaN	NaN	NaN	NaN
CPD22	ACTG1	NaN	NaN	NaN	NaN
CPD22	ARID1A	-13.7182	0.234157	2.25376	16.391
CPD22	ARID2	NaN	NaN	NaN	NaN
CPD22	ATM	NaN	NaN	NaN	NaN
CPD22	ATRX	NaN	NaN	NaN	NaN
CPD22	BCL7A	NaN	NaN	NaN	NaN
CPD22	BHLHE41	NaN	NaN	NaN	NaN
CPD22	BRAF	0.336698	0.500397	3.50278	33.5266
CPD22	BTG1	NaN	NaN	NaN	NaN
CPD22	CCND1	NaN	NaN	NaN	NaN
CPD22	CDKN1B	NaN	NaN	NaN	NaN
CPD22	CDKN2C	NaN	NaN	NaN	NaN
CPD22	CREBBP	NaN	NaN	NaN	NaN
CPD22	CYLD	5.82487	0.758346	3.0733	44.7424
CPD22	DIS3	-4.14496	0.569198	3.3714	36.9978
CPD22	DNMT3A	NaN	NaN	NaN	NaN
CPD22	DTX1	NaN	NaN	NaN	NaN
CPD22	DUSP2	-1.95611	0.812296	2.97842	46.3009
CPD22	EGR1	NaN	NaN	NaN	NaN
CPD22	EP300	8.5311	0.697998	2.98588	41.8799
CPD22	FGFR3	2.8999	0.975611	2.88931	50.7317
CPD22	FUBP1	NaN	NaN	NaN	NaN
CPD22	HIST1H1B	NaN	NaN	NaN	NaN
CPD22	HIST1H1D	14.5888	0.251976	2.1558	17.3864
CPD22	HIST1H1E	-12.9524	0.953265	2.93606	50.523
CPD22	HIST1H2BK	NaN	NaN	NaN	NaN
CPD22	HUWE1	NaN	NaN	NaN	NaN
CPD22	IDH1	NaN	NaN	NaN	NaN
CPD22	IDH2	NaN	NaN	NaN	NaN
CPD22	IGLL5	9.07039	0.0942161	1.20911	6.78356
CPD22	IRF4	NaN	NaN	NaN	NaN
CPD22	KDM5C	NaN	NaN	NaN	NaN
CPD22	KDM6A	NaN	NaN	NaN	NaN
CPD22	KLHL6	NaN	NaN	NaN	NaN
CPD22	KMT2B	1.25342	0.631168	3.23999	39.7636
CPD22	KMT2C	0.630067	0.648021	3.1186	40.1773
CPD22	KRAS	-2.06901	0.430391	3.31401	29.2666
CPD22	LCE1D	NaN	NaN	NaN	NaN
CPD22	LTB	23.2842	0.0478233	0.920598	3.53892
CPD22	MAF	NaN	NaN	NaN	NaN
CPD22	MAFB	NaN	NaN	NaN	NaN
CPD22	MAML2	NaN	NaN	NaN	NaN
CPD22	MAN2C1	NaN	NaN	NaN	NaN
CPD22	NCOR1	45.5829	7.09152e-06	0.000546047	0.000546047
CPD22	NF1	8.58114	0.063988	0.985415	4.67112
CPD22	NFKB2	NaN	NaN	NaN	NaN
CPD22	NFKBIA	NaN	NaN	NaN	NaN
CPD22	NRAS	-1.60477	0.626433	3.44538	40.0917
CPD22	PABPC1	NaN	NaN	NaN	NaN
CPD22	PIK3CA	NaN	NaN	NaN	NaN
CPD22	PIM1	NaN	NaN	NaN	NaN
CPD22	POT1	-4.74804	0.781943	3.01048	45.3527
CPD22	PRDM1	NaN	NaN	NaN	NaN
CPD22	PRKD2	-13.955	0.898186	3.00697	49.4002
CPD22	PTPN11	NaN	NaN	NaN	NaN
CPD22	RASA2	2.74888	0.983248	2.80408	50.1457
CPD22	RB1	-5.73423	0.922688	2.96029	49.8252
CPD22	RFTN1	NaN	NaN	NaN	NaN
CPD22	RPL10	NaN	NaN	NaN	NaN
CPD22	RPL5	6.80699	0.668512	3.02796	40.7792
CPD22	RPRD1B	NaN	NaN	NaN	NaN
CPD22	RPS3A	NaN	NaN	NaN	NaN
CPD22	SAMHD1	NaN	NaN	NaN	NaN
CPD22	SETD2	45.5829	7.09152e-06	0.000273024	0.000538956
CPD22	SF3B1	NaN	NaN	NaN	NaN
CPD22	SP140	27.7684	0.0165715	0.425336	1.24286
CPD22	TCL1A	NaN	NaN	NaN	NaN
CPD22	TET2	2.16588	0.106483	1.17131	7.56029
CPD22	TGDS	NaN	NaN	NaN	NaN
CPD22	TP53	-3.2091	0.87955	3.07843	49.2548
CPD22	TRAF2	NaN	NaN	NaN	NaN
CPD22	TRAF3	-0.680107	0.527095	3.38219	34.7883
CPD22	UBR5	NaN	NaN	NaN	NaN
CPD22	XBP1	NaN	NaN	NaN	NaN
CPD22	ZFP36L1	NaN	NaN	NaN	NaN
CPD22	ZNF292	NaN	NaN	NaN	NaN
CRIZOTINIB	ABCF1	NaN	NaN	NaN	NaN
CRIZOTINIB	ACTG1	NaN	NaN	NaN	NaN
CRIZOTINIB	ARID1A	NaN	NaN	NaN	NaN
CRIZOTINIB	ARID2	6.74718	0.748251	3.84102	47.1398
CRIZOTINIB	ATM	NaN	NaN	NaN	NaN
CRIZOTINIB	ATRX	NaN	NaN	NaN	NaN
CRIZOTINIB	BCL7A	NaN	NaN	NaN	NaN
CRIZOTINIB	BHLHE41	NaN	NaN	NaN	NaN
CRIZOTINIB	BRAF	6.94588	0.515363	3.96829	35.0447
CRIZOTINIB	BTG1	NaN	NaN	NaN	NaN
CRIZOTINIB	CCND1	NaN	NaN	NaN	NaN
CRIZOTINIB	CDKN1B	NaN	NaN	NaN	NaN
CRIZOTINIB	CDKN2C	NaN	NaN	NaN	NaN
CRIZOTINIB	CREBBP	NaN	NaN	NaN	NaN
CRIZOTINIB	CYLD	3.96927	0.70715	3.88933	45.2576
CRIZOTINIB	DIS3	NaN	NaN	NaN	NaN
CRIZOTINIB	DNMT3A	NaN	NaN	NaN	NaN
CRIZOTINIB	DTX1	NaN	NaN	NaN	NaN
CRIZOTINIB	DUSP2	NaN	NaN	NaN	NaN
CRIZOTINIB	EGR1	NaN	NaN	NaN	NaN
CRIZOTINIB	EP300	6.51461	0.64688	4.15082	42.6941
CRIZOTINIB	FGFR3	NaN	NaN	NaN	NaN
CRIZOTINIB	FUBP1	NaN	NaN	NaN	NaN
CRIZOTINIB	HIST1H1B	NaN	NaN	NaN	NaN
CRIZOTINIB	HIST1H1D	NaN	NaN	NaN	NaN
CRIZOTINIB	HIST1H1E	NaN	NaN	NaN	NaN
CRIZOTINIB	HIST1H2BK	NaN	NaN	NaN	NaN
CRIZOTINIB	HUWE1	NaN	NaN	NaN	NaN
CRIZOTINIB	IDH1	NaN	NaN	NaN	NaN
CRIZOTINIB	IDH2	NaN	NaN	NaN	NaN
CRIZOTINIB	IGLL5	-11.8394	0.187129	7.20448	14.2218
CRIZOTINIB	IRF4	NaN	NaN	NaN	NaN
CRIZOTINIB	KDM5C	NaN	NaN	NaN	NaN
CRIZOTINIB	KDM6A	-5.71513	0.392061	6.03774	28.6205
CRIZOTINIB	KLHL6	NaN	NaN	NaN	NaN
CRIZOTINIB	KMT2B	-0.342429	0.506821	4.33614	34.9707
CRIZOTINIB	KMT2C	2.90784	0.404034	5.1851	29.0904
CRIZOTINIB	KRAS	10.5078	0.068895	5.30492	5.30492
CRIZOTINIB	LCE1D	NaN	NaN	NaN	NaN
CRIZOTINIB	LTB	9.77761	0.417065	4.58771	29.6116
CRIZOTINIB	MAF	NaN	NaN	NaN	NaN
CRIZOTINIB	MAFB	NaN	NaN	NaN	NaN
CRIZOTINIB	MAML2	NaN	NaN	NaN	NaN
CRIZOTINIB	MAN2C1	NaN	NaN	NaN	NaN
CRIZOTINIB	NCOR1	NaN	NaN	NaN	NaN
CRIZOTINIB	NF1	NaN	NaN	NaN	NaN
CRIZOTINIB	NFKB2	NaN	NaN	NaN	NaN
CRIZOTINIB	NFKBIA	NaN	NaN	NaN	NaN
CRIZOTINIB	NRAS	4.82348	0.782018	3.76346	48.4851
CRIZOTINIB	PABPC1	NaN	NaN	NaN	NaN
CRIZOTINIB	PIK3CA	NaN	NaN	NaN	NaN
CRIZOTINIB	PIM1	NaN	NaN	NaN	NaN
CRIZOTINIB	POT1	NaN	NaN	NaN	NaN
CRIZOTINIB	PRDM1	10.0771	0.97012	3.93154	57.2371
CRIZOTINIB	PRKD2	NaN	NaN	NaN	NaN
CRIZOTINIB	PTPN11	11.5919	0.337304	6.49311	24.9605
CRIZOTINIB	RASA2	1.03416	0.898058	3.84169	53.8835
CRIZOTINIB	RB1	NaN	NaN	NaN	NaN
CRIZOTINIB	RFTN1	NaN	NaN	NaN	NaN
CRIZOTINIB	RPL10	NaN	NaN	NaN	NaN
CRIZOTINIB	RPL5	NaN	NaN	NaN	NaN
CRIZOTINIB	RPRD1B	NaN	NaN	NaN	NaN
CRIZOTINIB	RPS3A	NaN	NaN	NaN	NaN
CRIZOTINIB	SAMHD1	NaN	NaN	NaN	NaN
CRIZOTINIB	SETD2	NaN	NaN	NaN	NaN
CRIZOTINIB	SF3B1	NaN	NaN	NaN	NaN
CRIZOTINIB	SP140	NaN	NaN	NaN	NaN
CRIZOTINIB	TCL1A	NaN	NaN	NaN	NaN
CRIZOTINIB	TET2	-11.4418	0.26449	6.78858	19.8367
CRIZOTINIB	TGDS	NaN	NaN	NaN	NaN
CRIZOTINIB	TP53	3.895	0.859205	3.89169	52.4115
CRIZOTINIB	TRAF2	NaN	NaN	NaN	NaN
CRIZOTINIB	TRAF3	-7.98966	0.450517	4.33623	31.5362
CRIZOTINIB	UBR5	-6.56179	0.522311	3.65618	34.9948
CRIZOTINIB	XBP1	NaN	NaN	NaN	NaN
CRIZOTINIB	ZFP36L1	NaN	NaN	NaN	NaN
CRIZOTINIB	ZNF292	-4.7896	0.696274	4.12408	45.2578
DABRAFENIB	ABCF1	NaN	NaN	NaN	NaN
DABRAFENIB	ACTG1	NaN	NaN	NaN	NaN
DABRAFENIB	ARID1A	NaN	NaN	NaN	NaN
DABRAFENIB	ARID2	NaN	NaN	NaN	NaN
DABRAFENIB	ATM	NaN	NaN	NaN	NaN
DABRAFENIB	ATRX	NaN	NaN	NaN	NaN
DABRAFENIB	BCL7A	NaN	NaN	NaN	NaN
DABRAFENIB	BHLHE41	NaN	NaN	NaN	NaN
DABRAFENIB	BRAF	-3.05054	0.323941	4.98868	23.6477
DABRAFENIB	BTG1	NaN	NaN	NaN	NaN
DABRAFENIB	CCND1	NaN	NaN	NaN	NaN
DABRAFENIB	CDKN1B	NaN	NaN	NaN	NaN
DABRAFENIB	CDKN2C	NaN	NaN	NaN	NaN
DABRAFENIB	CREBBP	NaN	NaN	NaN	NaN
DABRAFENIB	CYLD	-2.88952	0.642366	4.94622	43.6809
DABRAFENIB	DIS3	-5.89376	0.231641	17.8363	17.8363
DABRAFENIB	DNMT3A	NaN	NaN	NaN	NaN
DABRAFENIB	DTX1	NaN	NaN	NaN	NaN
DABRAFENIB	DUSP2	NaN	NaN	NaN	NaN
DABRAFENIB	EGR1	NaN	NaN	NaN	NaN
DABRAFENIB	EP300	NaN	NaN	NaN	NaN
DABRAFENIB	FGFR3	NaN	NaN	NaN	NaN
DABRAFENIB	FUBP1	NaN	NaN	NaN	NaN
DABRAFENIB	HIST1H1B	NaN	NaN	NaN	NaN
DABRAFENIB	HIST1H1D	NaN	NaN	NaN	NaN
DABRAFENIB	HIST1H1E	NaN	NaN	NaN	NaN
DABRAFENIB	HIST1H2BK	NaN	NaN	NaN	NaN
DABRAFENIB	HUWE1	NaN	NaN	NaN	NaN
DABRAFENIB	IDH1	NaN	NaN	NaN	NaN
DABRAFENIB	IDH2	NaN	NaN	NaN	NaN
DABRAFENIB	IGLL5	-5.82102	0.297733	5.73136	22.0322
DABRAFENIB	IRF4	NaN	NaN	NaN	NaN
DABRAFENIB	KDM5C	NaN	NaN	NaN	NaN
DABRAFENIB	KDM6A	NaN	NaN	NaN	NaN
DABRAFENIB	KLHL6	NaN	NaN	NaN	NaN
DABRAFENIB	KMT2B	-5.47188	0.356352	4.57319	25.6574
DABRAFENIB	KMT2C	0.347393	0.381912	4.20103	27.1158
DABRAFENIB	KRAS	-0.359021	0.66651	4.66557	44.6562
DABRAFENIB	LCE1D	NaN	NaN	NaN	NaN
DABRAFENIB	LTB	-3.39968	0.814132	4.82217	52.9186
DABRAFENIB	MAF	NaN	NaN	NaN	NaN
DABRAFENIB	MAFB	NaN	NaN	NaN	NaN
DABRAFENIB	MAML2	NaN	NaN	NaN	NaN
DABRAFENIB	MAN2C1	NaN	NaN	NaN	NaN
DABRAFENIB	NCOR1	NaN	NaN	NaN	NaN
DABRAFENIB	NF1	NaN	NaN	NaN	NaN
DABRAFENIB	NFKB2	-3.31237	0.741799	4.75988	48.9587
DABRAFENIB	NFKBIA	NaN	NaN	NaN	NaN
DABRAFENIB	NRAS	-0.359021	0.98606	5.06177	62.1218
DABRAFENIB	PABPC1	NaN	NaN	NaN	NaN
DABRAFENIB	PIK3CA	NaN	NaN	NaN	NaN
DABRAFENIB	PIM1	1.04985	0.291356	11.2172	22.143
DABRAFENIB	POT1	0.961821	0.472745	4.0446	32.6194
DABRAFENIB	PRDM1	0.964266	0.871638	4.79401	55.7848
DABRAFENIB	PRKD2	NaN	NaN	NaN	NaN
DABRAFENIB	PTPN11	1.04985	0.291356	7.47813	21.8517
DABRAFENIB	RASA2	NaN	NaN	NaN	NaN
DABRAFENIB	RB1	NaN	NaN	NaN	NaN
DABRAFENIB	RFTN1	NaN	NaN	NaN	NaN
DABRAFENIB	RPL10	NaN	NaN	NaN	NaN
DABRAFENIB	RPL5	NaN	NaN	NaN	NaN
DABRAFENIB	RPRD1B	NaN	NaN	NaN	NaN
DABRAFENIB	RPS3A	NaN	NaN	NaN	NaN
DABRAFENIB	SAMHD1	NaN	NaN	NaN	NaN
DABRAFENIB	SETD2	NaN	NaN	NaN	NaN
DABRAFENIB	SF3B1	NaN	NaN	NaN	NaN
DABRAFENIB	SP140	NaN	NaN	NaN	NaN
DABRAFENIB	TCL1A	NaN	NaN	NaN	NaN
DABRAFENIB	TET2	NaN	NaN	NaN	NaN
DABRAFENIB	TGDS	NaN	NaN	NaN	NaN
DABRAFENIB	TP53	NaN	NaN	NaN	NaN
DABRAFENIB	TRAF2	NaN	NaN	NaN	NaN
DABRAFENIB	TRAF3	NaN	NaN	NaN	NaN
DABRAFENIB	UBR5	0.964266	0.4724	4.54685	33.068
DABRAFENIB	XBP1	NaN	NaN	NaN	NaN
DABRAFENIB	ZFP36L1	NaN	NaN	NaN	NaN
DABRAFENIB	ZNF292	NaN	NaN	NaN	NaN
DARATUMUMAB	ABCF1	-4.56326	0.38666	1.41775	22.0396
DARATUMUMAB	ACTG1	1.1109	0.330897	1.6986	20.8465
DARATUMUMAB	ARID1A	-2.67384	0.722981	1.39174	27.4733
DARATUMUMAB	ARID2	-2.67179	0.853396	1.36899	25.6019
DARATUMUMAB	ATM	-1.79562	0.990102	1.41181	23.7625
DARATUMUMAB	ATRX	-4.19156	0.464461	1.32457	23.6875
DARATUMUMAB	BCL7A	1.1315	0.327202	2.09954	21.5953
DARATUMUMAB	BHLHE41	NaN	NaN	NaN	NaN
DARATUMUMAB	BRAF	-1.50718	0.745168	1.36614	26.826
DARATUMUMAB	BTG1	-8.59714	0.0188957	0.727485	1.43608
DARATUMUMAB	CCND1	-1.59795	0.840846	1.43878	27.7479
DARATUMUMAB	CDKN1B	NaN	NaN	NaN	NaN
DARATUMUMAB	CDKN2C	NaN	NaN	NaN	NaN
DARATUMUMAB	CREBBP	-3.77297	0.00841924	0.648281	0.648281
DARATUMUMAB	CYLD	0.387536	0.440966	1.41477	23.8122
DARATUMUMAB	DIS3	-1.28384	0.985874	1.43231	24.6469
DARATUMUMAB	DNMT3A	NaN	NaN	NaN	NaN
DARATUMUMAB	DTX1	0.400748	0.846887	1.38745	26.2535
DARATUMUMAB	DUSP2	1.25018	0.231984	2.55182	16.4709
DARATUMUMAB	EGR1	0.951915	0.638497	1.32876	26.1784
DARATUMUMAB	EP300	NaN	NaN	NaN	NaN
DARATUMUMAB	FGFR3	-0.749204	0.527385	1.45031	26.3693
DARATUMUMAB	FUBP1	-0.299712	0.553294	1.37431	26.0048
DARATUMUMAB	HIST1H1B	NaN	NaN	NaN	NaN
DARATUMUMAB	HIST1H1D	-0.308149	0.552901	1.41911	26.5393
DARATUMUMAB	HIST1H1E	-3.00571	0.112315	2.88274	8.42359
DARATUMUMAB	HIST1H2BK	-2.2395	0.976419	1.4742	26.3633
DARATUMUMAB	HUWE1	NaN	NaN	NaN	NaN
DARATUMUMAB	IDH1	NaN	NaN	NaN	NaN
DARATUMUMAB	IDH2	NaN	NaN	NaN	NaN
DARATUMUMAB	IGLL5	-1.20433	0.453444	1.39661	24.0325
DARATUMUMAB	IRF4	-2.99988	0.376649	1.52642	22.2223
DARATUMUMAB	KDM5C	NaN	NaN	NaN	NaN
DARATUMUMAB	KDM6A	0.951915	0.406273	1.42195	22.7513
DARATUMUMAB	KLHL6	1.40868	0.286372	2.20506	19.4733
DARATUMUMAB	KMT2B	-4.47845	0.453619	1.34341	23.5882
DARATUMUMAB	KMT2C	-3.31471	0.299173	2.09421	20.0446
DARATUMUMAB	KRAS	-1.7211	0.191139	2.94354	13.9532
DARATUMUMAB	LCE1D	NaN	NaN	NaN	NaN
DARATUMUMAB	LTB	-0.97901	0.624441	1.37377	26.8509
DARATUMUMAB	MAF	-0.89383	0.649928	1.28319	25.3472
DARATUMUMAB	MAFB	NaN	NaN	NaN	NaN
DARATUMUMAB	MAML2	-0.649861	0.640631	1.29812	25.6253
DARATUMUMAB	MAN2C1	NaN	NaN	NaN	NaN
DARATUMUMAB	NCOR1	-1.49261	0.609338	1.42179	27.4202
DARATUMUMAB	NF1	-1.93932	0.80126	1.43482	28.0441
DARATUMUMAB	NFKB2	1.36506	0.186814	3.59617	13.8243
DARATUMUMAB	NFKBIA	NaN	NaN	NaN	NaN
DARATUMUMAB	NRAS	-1.00089	0.82757	1.44825	28.1374
DARATUMUMAB	PABPC1	NaN	NaN	NaN	NaN
DARATUMUMAB	PIK3CA	-2.34482	0.887043	1.39393	25.7243
DARATUMUMAB	PIM1	1.1315	0.327202	1.93804	21.2681
DARATUMUMAB	POT1	-3.37048	0.330033	1.81518	21.1221
DARATUMUMAB	PRDM1	-3.27482	0.633894	1.35583	26.6236
DARATUMUMAB	PRKD2	1.1315	0.844807	1.41413	27.0338
DARATUMUMAB	PTPN11	1.27009	0.227048	2.91379	16.3475
DARATUMUMAB	RASA2	0.951915	0.536102	1.42344	26.269
DARATUMUMAB	RB1	-5.00951	0.341654	1.64421	21.1825
DARATUMUMAB	RFTN1	0.855916	0.378802	1.45839	21.9705
DARATUMUMAB	RPL10	NaN	NaN	NaN	NaN
DARATUMUMAB	RPL5	0.206582	0.438147	1.46684	24.0981
DARATUMUMAB	RPRD1B	NaN	NaN	NaN	NaN
DARATUMUMAB	RPS3A	NaN	NaN	NaN	NaN
DARATUMUMAB	SAMHD1	NaN	NaN	NaN	NaN
DARATUMUMAB	SETD2	-1.47573	0.56909	1.36937	26.1782
DARATUMUMAB	SF3B1	-0.740327	0.370398	1.67769	22.5943
DARATUMUMAB	SP140	-2.49276	0.932143	1.4355	26.1
DARATUMUMAB	TCL1A	NaN	NaN	NaN	NaN
DARATUMUMAB	TET2	1.41756	0.376616	1.61108	22.597
DARATUMUMAB	TGDS	-1.90834	0.741465	1.39251	27.4342
DARATUMUMAB	TP53	-0.227187	0.611157	1.38409	26.8909
DARATUMUMAB	TRAF2	-2.29371	0.98497	1.45851	25.6092
DARATUMUMAB	TRAF3	-1.74214	0.245229	2.09807	16.9208
DARATUMUMAB	UBR5	0.849309	0.232171	2.23464	16.2519
DARATUMUMAB	XBP1	NaN	NaN	NaN	NaN
DARATUMUMAB	ZFP36L1	NaN	NaN	NaN	NaN
DARATUMUMAB	ZNF292	NaN	NaN	NaN	NaN
DASATINIB	ABCF1	NaN	NaN	NaN	NaN
DASATINIB	ACTG1	NaN	NaN	NaN	NaN
DASATINIB	ARID1A	NaN	NaN	NaN	NaN
DASATINIB	ARID2	NaN	NaN	NaN	NaN
DASATINIB	ATM	NaN	NaN	NaN	NaN
DASATINIB	ATRX	NaN	NaN	NaN	NaN
DASATINIB	BCL7A	NaN	NaN	NaN	NaN
DASATINIB	BHLHE41	NaN	NaN	NaN	NaN
DASATINIB	BRAF	2.09944	0.777209	6.64945	53.6274
DASATINIB	BTG1	NaN	NaN	NaN	NaN
DASATINIB	CCND1	NaN	NaN	NaN	NaN
DASATINIB	CDKN1B	NaN	NaN	NaN	NaN
DASATINIB	CDKN2C	NaN	NaN	NaN	NaN
DASATINIB	CREBBP	NaN	NaN	NaN	NaN
DASATINIB	CYLD	-0.460789	0.309065	7.93268	23.1799
DASATINIB	DIS3	NaN	NaN	NaN	NaN
DASATINIB	DNMT3A	NaN	NaN	NaN	NaN
DASATINIB	DTX1	NaN	NaN	NaN	NaN
DASATINIB	DUSP2	NaN	NaN	NaN	NaN
DASATINIB	EGR1	NaN	NaN	NaN	NaN
DASATINIB	EP300	NaN	NaN	NaN	NaN
DASATINIB	FGFR3	NaN	NaN	NaN	NaN
DASATINIB	FUBP1	NaN	NaN	NaN	NaN
DASATINIB	HIST1H1B	NaN	NaN	NaN	NaN
DASATINIB	HIST1H1D	NaN	NaN	NaN	NaN
DASATINIB	HIST1H1E	NaN	NaN	NaN	NaN
DASATINIB	HIST1H2BK	NaN	NaN	NaN	NaN
DASATINIB	HUWE1	NaN	NaN	NaN	NaN
DASATINIB	IDH1	NaN	NaN	NaN	NaN
DASATINIB	IDH2	NaN	NaN	NaN	NaN
DASATINIB	IGLL5	-6.15503	0.202089	7.78044	15.3588
DASATINIB	IRF4	NaN	NaN	NaN	NaN
DASATINIB	KDM5C	NaN	NaN	NaN	NaN
DASATINIB	KDM6A	NaN	NaN	NaN	NaN
DASATINIB	KLHL6	NaN	NaN	NaN	NaN
DASATINIB	KMT2B	-2.68662	0.652843	7.18127	46.3518
DASATINIB	KMT2C	NaN	NaN	NaN	NaN
DASATINIB	KRAS	-0.406082	0.763078	7.34463	53.4155
DASATINIB	LCE1D	NaN	NaN	NaN	NaN
DASATINIB	LTB	-3.17398	0.60874	7.81217	43.8293
DASATINIB	MAF	NaN	NaN	NaN	NaN
DASATINIB	MAFB	NaN	NaN	NaN	NaN
DASATINIB	MAML2	NaN	NaN	NaN	NaN
DASATINIB	MAN2C1	NaN	NaN	NaN	NaN
DASATINIB	NCOR1	NaN	NaN	NaN	NaN
DASATINIB	NF1	NaN	NaN	NaN	NaN
DASATINIB	NFKB2	NaN	NaN	NaN	NaN
DASATINIB	NFKBIA	NaN	NaN	NaN	NaN
DASATINIB	NRAS	1.28595	0.607637	9.35761	44.3575
DASATINIB	PABPC1	NaN	NaN	NaN	NaN
DASATINIB	PIK3CA	NaN	NaN	NaN	NaN
DASATINIB	PIM1	NaN	NaN	NaN	NaN
DASATINIB	POT1	NaN	NaN	NaN	NaN
DASATINIB	PRDM1	4.21602	0.320277	6.16533	23.7005
DASATINIB	PRKD2	NaN	NaN	NaN	NaN
DASATINIB	PTPN11	6.78125	0.0565165	4.35177	4.35177
DASATINIB	RASA2	NaN	NaN	NaN	NaN
DASATINIB	RB1	NaN	NaN	NaN	NaN
DASATINIB	RFTN1	NaN	NaN	NaN	NaN
DASATINIB	RPL10	NaN	NaN	NaN	NaN
DASATINIB	RPL5	NaN	NaN	NaN	NaN
DASATINIB	RPRD1B	NaN	NaN	NaN	NaN
DASATINIB	RPS3A	NaN	NaN	NaN	NaN
DASATINIB	SAMHD1	NaN	NaN	NaN	NaN
DASATINIB	SETD2	NaN	NaN	NaN	NaN
DASATINIB	SF3B1	NaN	NaN	NaN	NaN
DASATINIB	SP140	NaN	NaN	NaN	NaN
DASATINIB	TCL1A	NaN	NaN	NaN	NaN
DASATINIB	TET2	NaN	NaN	NaN	NaN
DASATINIB	TGDS	NaN	NaN	NaN	NaN
DASATINIB	TP53	NaN	NaN	NaN	NaN
DASATINIB	TRAF2	NaN	NaN	NaN	NaN
DASATINIB	TRAF3	NaN	NaN	NaN	NaN
DASATINIB	UBR5	NaN	NaN	NaN	NaN
DASATINIB	XBP1	NaN	NaN	NaN	NaN
DASATINIB	ZFP36L1	NaN	NaN	NaN	NaN
DASATINIB	ZNF292	NaN	NaN	NaN	NaN
DEX	ABCF1	-2.20793	0.830583	1.36074	25.7481
DEX	ACTG1	-12.3524	0.0846886	0.724558	5.84351
DEX	ARID1A	-3.01796	0.582706	1.31966	25.6391
DEX	ARID2	3.63927	0.515575	1.41783	25.7788
DEX	ATM	0.0143301	0.455299	1.40232	24.1309
DEX	ATRX	-0.589395	0.979561	1.27841	18.6117
DEX	BCL7A	-10.5077	0.0354762	0.455277	2.55428
DEX	BHLHE41	NaN	NaN	NaN	NaN
DEX	BRAF	0.777473	0.521215	1.33779	25.0183
DEX	BTG1	-17.4617	0.0124898	0.480856	0.949223
DEX	CCND1	6.96902	0.395382	1.26852	21.3507
DEX	CDKN1B	0.696818	0.913085	1.30199	21.914
DEX	CDKN2C	NaN	NaN	NaN	NaN
DEX	CREBBP	0.0807687	0.830503	1.39019	26.5761
DEX	CYLD	2.14289	0.543489	1.30777	25.0005
DEX	DIS3	0.257968	0.912493	1.3257	22.8123
DEX	DNMT3A	NaN	NaN	NaN	NaN
DEX	DTX1	-10.1366	0.101569	0.710985	6.80514
DEX	DUSP2	1.78354	0.657208	1.33171	26.2883
DEX	EGR1	-1.11158	0.572986	1.33697	25.7844
DEX	EP300	-4.58622	0.523596	1.30054	24.609
DEX	FGFR3	2.61799	0.459839	1.36183	23.9116
DEX	FUBP1	-8.24565	0.124721	0.800295	8.23161
DEX	HIST1H1B	NaN	NaN	NaN	NaN
DEX	HIST1H1D	-13.5242	0.0278591	0.42903	2.03371
DEX	HIST1H1E	-2.182	0.984941	1.26401	17.7289
DEX	HIST1H2BK	-0.108308	0.924281	1.29399	21.2585
DEX	HUWE1	-1.4298	0.646133	1.34466	26.4915
DEX	IDH1	0.848817	0.813396	1.39181	26.8421
DEX	IDH2	NaN	NaN	NaN	NaN
DEX	IGLL5	0.596084	0.792755	1.41959	27.7464
DEX	IRF4	-0.0037281	0.942973	1.27384	19.8024
DEX	KDM5C	NaN	NaN	NaN	NaN
DEX	KDM6A	4.04793	0.216259	1.04074	13.408
DEX	KLHL6	-3.72033	0.51679	1.37217	25.3227
DEX	KMT2B	-0.0037281	0.883717	1.30858	22.9766
DEX	KMT2C	8.48684	0.00611539	0.470885	0.470885
DEX	KRAS	-1.98027	0.385292	1.28989	21.1911
DEX	LCE1D	NaN	NaN	NaN	NaN
DEX	LTB	-4.74604	0.0763755	0.840131	5.42266
DEX	MAF	-2.1105	0.257248	1.10045	15.4349
DEX	MAFB	NaN	NaN	NaN	NaN
DEX	MAML2	10.7386	0.0772248	0.743288	5.40573
DEX	MAN2C1	7.94891	0.196858	1.01054	12.4021
DEX	NCOR1	5.09732	0.223442	1.01206	13.6299
DEX	NF1	-7.08026	0.0851324	0.65552	5.78901
DEX	NFKB2	0.704508	0.692138	1.36653	26.9934
DEX	NFKBIA	NaN	NaN	NaN	NaN
DEX	NRAS	-1.9592	0.8082	1.41435	27.4788
DEX	PABPC1	NaN	NaN	NaN	NaN
DEX	PIK3CA	3.5621	0.619976	1.36395	26.659
DEX	PIM1	NaN	NaN	NaN	NaN
DEX	POT1	0.290856	0.63488	1.35794	26.665
DEX	PRDM1	-4.84209	0.377808	1.32233	21.1573
DEX	PRKD2	6.20956	0.131231	0.777289	8.52999
DEX	PTPN11	5.14366	0.841014	1.34913	25.2304
DEX	RASA2	3.43934	0.722487	1.39079	27.4545
DEX	RB1	-1.26623	0.351324	1.28819	20.0255
DEX	RFTN1	NaN	NaN	NaN	NaN
DEX	RPL10	0.732014	0.857752	1.3479	24.8748
DEX	RPL5	11.7966	0.0189132	0.364079	1.39958
DEX	RPRD1B	NaN	NaN	NaN	NaN
DEX	RPS3A	NaN	NaN	NaN	NaN
DEX	SAMHD1	0.256113	0.881566	1.33099	23.8023
DEX	SETD2	-2.77917	0.960128	1.27465	19.2026
DEX	SF3B1	-4.71858	0.313874	1.20842	18.2047
DEX	SP140	-1.4298	0.74962	1.3743	26.9863
DEX	TCL1A	NaN	NaN	NaN	NaN
DEX	TET2	1.14377	0.494956	1.41154	25.2428
DEX	TGDS	0.0949853	0.739243	1.38833	27.352
DEX	TP53	3.31299	0.285289	1.15617	16.832
DEX	TRAF2	-1.4298	0.929543	1.27812	20.4499
DEX	TRAF3	-0.16733	0.880585	1.3561	24.6564
DEX	UBR5	-3.5683	0.0167145	0.429006	1.25359
DEX	XBP1	NaN	NaN	NaN	NaN
DEX	ZFP36L1	NaN	NaN	NaN	NaN
DEX	ZNF292	6.74829	0.144071	0.792389	9.22053
DINACICLIB	ABCF1	NaN	NaN	NaN	NaN
DINACICLIB	ACTG1	NaN	NaN	NaN	NaN
DINACICLIB	ARID1A	23.9892	0.014571	1.12197	1.12197
DINACICLIB	ARID2	-0.734756	0.799751	3.07904	46.3856
DINACICLIB	ATM	NaN	NaN	NaN	NaN
DINACICLIB	ATRX	NaN	NaN	NaN	NaN
DINACICLIB	BCL7A	NaN	NaN	NaN	NaN
DINACICLIB	BHLHE41	NaN	NaN	NaN	NaN
DINACICLIB	BRAF	9.23991	0.819975	2.74514	45.0986
DINACICLIB	BTG1	NaN	NaN	NaN	NaN
DINACICLIB	CCND1	NaN	NaN	NaN	NaN
DINACICLIB	CDKN1B	NaN	NaN	NaN	NaN
DINACICLIB	CDKN2C	NaN	NaN	NaN	NaN
DINACICLIB	CREBBP	-0.382853	0.828683	2.65869	44.7489
DINACICLIB	CYLD	-5.95173	0.888715	2.28104	42.6583
DINACICLIB	DIS3	3.40944	0.853183	2.6278	45.2187
DINACICLIB	DNMT3A	NaN	NaN	NaN	NaN
DINACICLIB	DTX1	NaN	NaN	NaN	NaN
DINACICLIB	DUSP2	NaN	NaN	NaN	NaN
DINACICLIB	EGR1	NaN	NaN	NaN	NaN
DINACICLIB	EP300	5.58994	0.677262	3.25932	41.9902
DINACICLIB	FGFR3	-1.71663	0.80788	2.82758	45.2413
DINACICLIB	FUBP1	NaN	NaN	NaN	NaN
DINACICLIB	HIST1H1B	NaN	NaN	NaN	NaN
DINACICLIB	HIST1H1D	-14.5619	0.0844114	2.16656	6.33086
DINACICLIB	HIST1H1E	-10.1629	0.0921315	1.77353	6.81773
DINACICLIB	HIST1H2BK	NaN	NaN	NaN	NaN
DINACICLIB	HUWE1	NaN	NaN	NaN	NaN
DINACICLIB	IDH1	NaN	NaN	NaN	NaN
DINACICLIB	IDH2	NaN	NaN	NaN	NaN
DINACICLIB	IGLL5	4.50227	0.865379	2.46793	44.1343
DINACICLIB	IRF4	NaN	NaN	NaN	NaN
DINACICLIB	KDM5C	NaN	NaN	NaN	NaN
DINACICLIB	KDM6A	0.776181	0.80293	2.94408	45.767
DINACICLIB	KLHL6	-0.0867575	0.853204	2.5268	44.3666
DINACICLIB	KMT2B	-0.765293	0.869052	2.38989	43.4526
DINACICLIB	KMT2C	-1.22417	0.372545	3.18733	25.7056
DINACICLIB	KRAS	-6.42605	0.460876	2.95729	30.4178
DINACICLIB	LCE1D	NaN	NaN	NaN	NaN
DINACICLIB	LTB	0.30653	0.885983	2.35244	43.4131
DINACICLIB	MAF	NaN	NaN	NaN	NaN
DINACICLIB	MAFB	NaN	NaN	NaN	NaN
DINACICLIB	MAML2	NaN	NaN	NaN	NaN
DINACICLIB	MAN2C1	NaN	NaN	NaN	NaN
DINACICLIB	NCOR1	-5.76701	0.430158	3.31221	29.2507
DINACICLIB	NF1	-1.71663	0.678596	3.07364	41.3943
DINACICLIB	NFKB2	NaN	NaN	NaN	NaN
DINACICLIB	NFKBIA	NaN	NaN	NaN	NaN
DINACICLIB	NRAS	26.254	0.0517777	1.99344	3.93511
DINACICLIB	PABPC1	NaN	NaN	NaN	NaN
DINACICLIB	PIK3CA	NaN	NaN	NaN	NaN
DINACICLIB	PIM1	NaN	NaN	NaN	NaN
DINACICLIB	POT1	-4.87591	0.597788	3.28783	38.2584
DINACICLIB	PRDM1	NaN	NaN	NaN	NaN
DINACICLIB	PRKD2	-2.97816	0.538596	3.19014	35.0087
DINACICLIB	PTPN11	NaN	NaN	NaN	NaN
DINACICLIB	RASA2	-3.95815	0.114096	1.46423	8.21492
DINACICLIB	RB1	-4.87591	0.357555	3.44147	25.0289
DINACICLIB	RFTN1	NaN	NaN	NaN	NaN
DINACICLIB	RPL10	NaN	NaN	NaN	NaN
DINACICLIB	RPL5	5.5438	0.774528	3.13888	45.6972
DINACICLIB	RPRD1B	NaN	NaN	NaN	NaN
DINACICLIB	RPS3A	NaN	NaN	NaN	NaN
DINACICLIB	SAMHD1	NaN	NaN	NaN	NaN
DINACICLIB	SETD2	-5.76701	0.430158	3.0111	28.8206
DINACICLIB	SF3B1	NaN	NaN	NaN	NaN
DINACICLIB	SP140	-13.4223	0.109763	1.69036	8.01273
DINACICLIB	TCL1A	NaN	NaN	NaN	NaN
DINACICLIB	TET2	-1.27099	0.907986	2.25532	42.6753
DINACICLIB	TGDS	NaN	NaN	NaN	NaN
DINACICLIB	TP53	2.77149	0.335463	3.69009	23.8179
DINACICLIB	TRAF2	NaN	NaN	NaN	NaN
DINACICLIB	TRAF3	3.57794	0.694227	2.96975	41.6536
DINACICLIB	UBR5	-5.38812	0.606126	3.11145	38.1859
DINACICLIB	XBP1	NaN	NaN	NaN	NaN
DINACICLIB	ZFP36L1	NaN	NaN	NaN	NaN
DINACICLIB	ZNF292	NaN	NaN	NaN	NaN
DOVITINIB	ABCF1	NaN	NaN	NaN	NaN
DOVITINIB	ACTG1	NaN	NaN	NaN	NaN
DOVITINIB	ARID1A	-5.16279	0.544585	10.4833	40.2993
DOVITINIB	ARID2	NaN	NaN	NaN	NaN
DOVITINIB	ATM	NaN	NaN	NaN	NaN
DOVITINIB	ATRX	NaN	NaN	NaN	NaN
DOVITINIB	BCL7A	NaN	NaN	NaN	NaN
DOVITINIB	BHLHE41	NaN	NaN	NaN	NaN
DOVITINIB	BRAF	NaN	NaN	NaN	NaN
DOVITINIB	BTG1	NaN	NaN	NaN	NaN
DOVITINIB	CCND1	NaN	NaN	NaN	NaN
DOVITINIB	CDKN1B	NaN	NaN	NaN	NaN
DOVITINIB	CDKN2C	NaN	NaN	NaN	NaN
DOVITINIB	CREBBP	NaN	NaN	NaN	NaN
DOVITINIB	CYLD	3.8694	0.999926	12.8324	71.9947
DOVITINIB	DIS3	NaN	NaN	NaN	NaN
DOVITINIB	DNMT3A	NaN	NaN	NaN	NaN
DOVITINIB	DTX1	NaN	NaN	NaN	NaN
DOVITINIB	DUSP2	NaN	NaN	NaN	NaN
DOVITINIB	EGR1	NaN	NaN	NaN	NaN
DOVITINIB	EP300	NaN	NaN	NaN	NaN
DOVITINIB	FGFR3	NaN	NaN	NaN	NaN
DOVITINIB	FUBP1	NaN	NaN	NaN	NaN
DOVITINIB	HIST1H1B	NaN	NaN	NaN	NaN
DOVITINIB	HIST1H1D	NaN	NaN	NaN	NaN
DOVITINIB	HIST1H1E	-4.98906	0.497965	38.3433	38.3433
DOVITINIB	HIST1H2BK	NaN	NaN	NaN	NaN
DOVITINIB	HUWE1	NaN	NaN	NaN	NaN
DOVITINIB	IDH1	NaN	NaN	NaN	NaN
DOVITINIB	IDH2	NaN	NaN	NaN	NaN
DOVITINIB	IGLL5	0.66171	0.732569	11.2816	53.4775
DOVITINIB	IRF4	NaN	NaN	NaN	NaN
DOVITINIB	KDM5C	NaN	NaN	NaN	NaN
DOVITINIB	KDM6A	NaN	NaN	NaN	NaN
DOVITINIB	KLHL6	NaN	NaN	NaN	NaN
DOVITINIB	KMT2B	NaN	NaN	NaN	NaN
DOVITINIB	KMT2C	NaN	NaN	NaN	NaN
DOVITINIB	KRAS	-4.98906	0.497965	19.1717	37.8454
DOVITINIB	LCE1D	NaN	NaN	NaN	NaN
DOVITINIB	LTB	NaN	NaN	NaN	NaN
DOVITINIB	MAF	NaN	NaN	NaN	NaN
DOVITINIB	MAFB	NaN	NaN	NaN	NaN
DOVITINIB	MAML2	NaN	NaN	NaN	NaN
DOVITINIB	MAN2C1	NaN	NaN	NaN	NaN
DOVITINIB	NCOR1	NaN	NaN	NaN	NaN
DOVITINIB	NF1	NaN	NaN	NaN	NaN
DOVITINIB	NFKB2	NaN	NaN	NaN	NaN
DOVITINIB	NFKBIA	NaN	NaN	NaN	NaN
DOVITINIB	NRAS	NaN	NaN	NaN	NaN
DOVITINIB	PABPC1	NaN	NaN	NaN	NaN
DOVITINIB	PIK3CA	NaN	NaN	NaN	NaN
DOVITINIB	PIM1	NaN	NaN	NaN	NaN
DOVITINIB	POT1	NaN	NaN	NaN	NaN
DOVITINIB	PRDM1	NaN	NaN	NaN	NaN
DOVITINIB	PRKD2	-4.98906	0.497965	12.7811	37.3474
DOVITINIB	PTPN11	NaN	NaN	NaN	NaN
DOVITINIB	RASA2	NaN	NaN	NaN	NaN
DOVITINIB	RB1	NaN	NaN	NaN	NaN
DOVITINIB	RFTN1	NaN	NaN	NaN	NaN
DOVITINIB	RPL10	NaN	NaN	NaN	NaN
DOVITINIB	RPL5	NaN	NaN	NaN	NaN
DOVITINIB	RPRD1B	NaN	NaN	NaN	NaN
DOVITINIB	RPS3A	NaN	NaN	NaN	NaN
DOVITINIB	SAMHD1	NaN	NaN	NaN	NaN
DOVITINIB	SETD2	NaN	NaN	NaN	NaN
DOVITINIB	SF3B1	NaN	NaN	NaN	NaN
DOVITINIB	SP140	NaN	NaN	NaN	NaN
DOVITINIB	TCL1A	NaN	NaN	NaN	NaN
DOVITINIB	TET2	NaN	NaN	NaN	NaN
DOVITINIB	TGDS	NaN	NaN	NaN	NaN
DOVITINIB	TP53	NaN	NaN	NaN	NaN
DOVITINIB	TRAF2	NaN	NaN	NaN	NaN
DOVITINIB	TRAF3	NaN	NaN	NaN	NaN
DOVITINIB	UBR5	NaN	NaN	NaN	NaN
DOVITINIB	XBP1	NaN	NaN	NaN	NaN
DOVITINIB	ZFP36L1	NaN	NaN	NaN	NaN
DOVITINIB	ZNF292	NaN	NaN	NaN	NaN
DOX	ABCF1	NaN	NaN	NaN	NaN
DOX	ACTG1	12.8303	0.141166	1.08698	9.59926
DOX	ARID1A	-0.812154	0.629804	1.46954	28.3412
DOX	ARID2	10.2768	0.424303	1.36131	22.9124
DOX	ATM	6.69516	0.170694	1.01103	11.0951
DOX	ATRX	1.66541	0.429972	1.27338	22.3585
DOX	BCL7A	-2.13275	0.212712	1.09192	13.4009
DOX	BHLHE41	NaN	NaN	NaN	NaN
DOX	BRAF	3.6541	0.421037	1.40956	23.1571
DOX	BTG1	-2.02307	0.749651	1.48008	29.2364
DOX	CCND1	-0.463936	0.375424	1.37655	21.3992
DOX	CDKN1B	NaN	NaN	NaN	NaN
DOX	CDKN2C	NaN	NaN	NaN	NaN
DOX	CREBBP	-10.1429	0.80037	1.43322	28.013
DOX	CYLD	7.76375	0.370471	1.42632	21.4873
DOX	DIS3	5.08692	0.150976	1.05684	10.1154
DOX	DNMT3A	NaN	NaN	NaN	NaN
DOX	DTX1	NaN	NaN	NaN	NaN
DOX	DUSP2	10.1086	0.264453	1.13127	15.8672
DOX	EGR1	-1.52685	0.909248	1.40024	25.4589
DOX	EP300	8.95939	0.333848	1.35296	19.6971
DOX	FGFR3	-4.87824	0.653353	1.47965	28.7475
DOX	FUBP1	NaN	NaN	NaN	NaN
DOX	HIST1H1B	NaN	NaN	NaN	NaN
DOX	HIST1H1D	-11.9713	0.0805679	0.886246	5.72032
DOX	HIST1H1E	-15.0302	0.0231594	0.594426	1.73696
DOX	HIST1H2BK	NaN	NaN	NaN	NaN
DOX	HUWE1	2.90741	0.857795	1.37605	25.7338
DOX	IDH1	9.14481	0.15426	0.989835	10.1812
DOX	IDH2	NaN	NaN	NaN	NaN
DOX	IGLL5	0.613592	0.431415	1.23033	22.0021
DOX	IRF4	2.9426	0.806622	1.41159	27.4252
DOX	KDM5C	NaN	NaN	NaN	NaN
DOX	KDM6A	-2.81925	0.42634	1.31313	22.596
DOX	KLHL6	NaN	NaN	NaN	NaN
DOX	KMT2B	1.66541	0.75219	1.44797	28.5832
DOX	KMT2C	-0.234236	0.920882	1.39035	24.8638
DOX	KRAS	-2.50374	0.10188	0.980594	7.13159
DOX	LCE1D	NaN	NaN	NaN	NaN
DOX	LTB	14.2391	0.0320155	0.493039	2.33713
DOX	MAF	0.0223132	0.809101	1.38446	26.7003
DOX	MAFB	NaN	NaN	NaN	NaN
DOX	MAML2	-2.7108	0.548007	1.36118	25.7563
DOX	MAN2C1	2.51985	0.896139	1.40822	25.988
DOX	NCOR1	5.07973	0.379762	1.32917	21.2667
DOX	NF1	-3.02071	0.260781	1.18119	15.9077
DOX	NFKB2	-8.99442	0.174888	0.961886	11.1929
DOX	NFKBIA	-0.892105	0.694137	1.44456	28.4596
DOX	NRAS	1.74224	0.983311	1.42858	24.5828
DOX	PABPC1	NaN	NaN	NaN	NaN
DOX	PIK3CA	-2.75034	0.583086	1.40305	26.8219
DOX	PIM1	3.04819	0.840936	1.3777	26.069
DOX	POT1	-4.0167	0.0777627	0.997954	5.59891
DOX	PRDM1	-0.0513919	0.138219	1.18254	9.53709
DOX	PRKD2	-15.3924	0.000981941	0.0756095	0.0756095
DOX	PTPN11	1.67732	0.233067	1.12164	14.4502
DOX	RASA2	-2.44832	0.663956	1.4607	28.5501
DOX	RB1	-0.85213	0.795181	1.45783	28.6265
DOX	RFTN1	NaN	NaN	NaN	NaN
DOX	RPL10	-0.239999	0.822602	1.37696	26.3233
DOX	RPL5	NaN	NaN	NaN	NaN
DOX	RPRD1B	NaN	NaN	NaN	NaN
DOX	RPS3A	NaN	NaN	NaN	NaN
DOX	SAMHD1	9.11574	0.535491	1.37443	25.7035
DOX	SETD2	NaN	NaN	NaN	NaN
DOX	SF3B1	NaN	NaN	NaN	NaN
DOX	SP140	-0.252927	0.478499	1.2705	23.4464
DOX	TCL1A	NaN	NaN	NaN	NaN
DOX	TET2	-2.48829	0.709325	1.43732	28.373
DOX	TGDS	13.3387	0.0305599	0.588278	2.26143
DOX	TP53	-1.07663	0.670416	1.43395	28.1575
DOX	TRAF2	0.913822	0.92869	1.37518	24.1459
DOX	TRAF3	-3.8018	0.437677	1.20361	21.8839
DOX	UBR5	-0.463936	0.759041	1.42552	28.0845
DOX	XBP1	NaN	NaN	NaN	NaN
DOX	ZFP36L1	NaN	NaN	NaN	NaN
DOX	ZNF292	16.9173	0.00229665	0.088421	0.174545
ELEVENOSTAT	ABCF1	NaN	NaN	NaN	NaN
ELEVENOSTAT	ACTG1	NaN	NaN	NaN	NaN
ELEVENOSTAT	ARID1A	NaN	NaN	NaN	NaN
ELEVENOSTAT	ARID2	NaN	NaN	NaN	NaN
ELEVENOSTAT	ATM	NaN	NaN	NaN	NaN
ELEVENOSTAT	ATRX	NaN	NaN	NaN	NaN
ELEVENOSTAT	BCL7A	NaN	NaN	NaN	NaN
ELEVENOSTAT	BHLHE41	NaN	NaN	NaN	NaN
ELEVENOSTAT	BRAF	1.62697	0.371014	2.04058	23.7449
ELEVENOSTAT	BTG1	NaN	NaN	NaN	NaN
ELEVENOSTAT	CCND1	NaN	NaN	NaN	NaN
ELEVENOSTAT	CDKN1B	NaN	NaN	NaN	NaN
ELEVENOSTAT	CDKN2C	NaN	NaN	NaN	NaN
ELEVENOSTAT	CREBBP	-8.30018	0.368002	2.1797	23.9201
ELEVENOSTAT	CYLD	-3.33833	0.848456	2.84048	46.6651
ELEVENOSTAT	DIS3	9.63928	0.100967	2.59149	7.57254
ELEVENOSTAT	DNMT3A	NaN	NaN	NaN	NaN
ELEVENOSTAT	DTX1	1.10656	0.712496	2.74311	41.3247
ELEVENOSTAT	DUSP2	NaN	NaN	NaN	NaN
ELEVENOSTAT	EGR1	NaN	NaN	NaN	NaN
ELEVENOSTAT	EP300	NaN	NaN	NaN	NaN
ELEVENOSTAT	FGFR3	NaN	NaN	NaN	NaN
ELEVENOSTAT	FUBP1	-13.078	0.102668	1.97636	7.59743
ELEVENOSTAT	HIST1H1B	NaN	NaN	NaN	NaN
ELEVENOSTAT	HIST1H1D	NaN	NaN	NaN	NaN
ELEVENOSTAT	HIST1H1E	-12.6539	0.117452	1.80875	8.57396
ELEVENOSTAT	HIST1H2BK	NaN	NaN	NaN	NaN
ELEVENOSTAT	HUWE1	NaN	NaN	NaN	NaN
ELEVENOSTAT	IDH1	NaN	NaN	NaN	NaN
ELEVENOSTAT	IDH2	NaN	NaN	NaN	NaN
ELEVENOSTAT	IGLL5	4.95655	0.27425	2.11172	18.649
ELEVENOSTAT	IRF4	-3.4162	0.766907	2.68418	42.9468
ELEVENOSTAT	KDM5C	NaN	NaN	NaN	NaN
ELEVENOSTAT	KDM6A	NaN	NaN	NaN	NaN
ELEVENOSTAT	KLHL6	4.93687	0.475923	2.29038	29.5072
ELEVENOSTAT	KMT2B	NaN	NaN	NaN	NaN
ELEVENOSTAT	KMT2C	1.59968	0.65904	2.81923	39.5424
ELEVENOSTAT	KRAS	1.58648	0.681127	2.76036	40.1865
ELEVENOSTAT	LCE1D	NaN	NaN	NaN	NaN
ELEVENOSTAT	LTB	1.10782	0.718194	2.63338	40.9371
ELEVENOSTAT	MAF	NaN	NaN	NaN	NaN
ELEVENOSTAT	MAFB	NaN	NaN	NaN	NaN
ELEVENOSTAT	MAML2	NaN	NaN	NaN	NaN
ELEVENOSTAT	MAN2C1	NaN	NaN	NaN	NaN
ELEVENOSTAT	NCOR1	-10.6635	0.166718	1.60466	11.6702
ELEVENOSTAT	NF1	NaN	NaN	NaN	NaN
ELEVENOSTAT	NFKB2	5.53484	0.312866	2.19007	20.9621
ELEVENOSTAT	NFKBIA	NaN	NaN	NaN	NaN
ELEVENOSTAT	NRAS	-3.97073	0.627563	2.84249	38.2814
ELEVENOSTAT	PABPC1	NaN	NaN	NaN	NaN
ELEVENOSTAT	PIK3CA	11.1366	0.0603486	4.64684	4.64684
ELEVENOSTAT	PIM1	NaN	NaN	NaN	NaN
ELEVENOSTAT	POT1	NaN	NaN	NaN	NaN
ELEVENOSTAT	PRDM1	NaN	NaN	NaN	NaN
ELEVENOSTAT	PRKD2	NaN	NaN	NaN	NaN
ELEVENOSTAT	PTPN11	-8.30515	0.367606	2.3588	24.262
ELEVENOSTAT	RASA2	NaN	NaN	NaN	NaN
ELEVENOSTAT	RB1	NaN	NaN	NaN	NaN
ELEVENOSTAT	RFTN1	NaN	NaN	NaN	NaN
ELEVENOSTAT	RPL10	NaN	NaN	NaN	NaN
ELEVENOSTAT	RPL5	NaN	NaN	NaN	NaN
ELEVENOSTAT	RPRD1B	NaN	NaN	NaN	NaN
ELEVENOSTAT	RPS3A	NaN	NaN	NaN	NaN
ELEVENOSTAT	SAMHD1	NaN	NaN	NaN	NaN
ELEVENOSTAT	SETD2	-6.91617	0.136261	1.49887	9.6745
ELEVENOSTAT	SF3B1	-7.63513	0.423293	2.1729	26.6675
ELEVENOSTAT	SP140	-13.9303	0.0772555	2.97434	5.87142
ELEVENOSTAT	TCL1A	NaN	NaN	NaN	NaN
ELEVENOSTAT	TET2	9.04131	0.121991	1.56556	8.78338
ELEVENOSTAT	TGDS	NaN	NaN	NaN	NaN
ELEVENOSTAT	TP53	-9.52634	0.226864	1.94095	15.6536
ELEVENOSTAT	TRAF2	-1.19131	0.975604	3.00486	51.707
ELEVENOSTAT	TRAF3	-3.33833	0.92881	2.97993	50.1558
ELEVENOSTAT	UBR5	NaN	NaN	NaN	NaN
ELEVENOSTAT	XBP1	NaN	NaN	NaN	NaN
ELEVENOSTAT	ZFP36L1	NaN	NaN	NaN	NaN
ELEVENOSTAT	ZNF292	NaN	NaN	NaN	NaN
ELOTUZUMAB	ABCF1	NaN	NaN	NaN	NaN
ELOTUZUMAB	ACTG1	NaN	NaN	NaN	NaN
ELOTUZUMAB	ARID1A	NaN	NaN	NaN	NaN
ELOTUZUMAB	ARID2	NaN	NaN	NaN	NaN
ELOTUZUMAB	ATM	NaN	NaN	NaN	NaN
ELOTUZUMAB	ATRX	NaN	NaN	NaN	NaN
ELOTUZUMAB	BCL7A	NaN	NaN	NaN	NaN
ELOTUZUMAB	BHLHE41	NaN	NaN	NaN	NaN
ELOTUZUMAB	BRAF	-4.33926	0.434921	8.37222	32.1841
ELOTUZUMAB	BTG1	NaN	NaN	NaN	NaN
ELOTUZUMAB	CCND1	NaN	NaN	NaN	NaN
ELOTUZUMAB	CDKN1B	NaN	NaN	NaN	NaN
ELOTUZUMAB	CDKN2C	NaN	NaN	NaN	NaN
ELOTUZUMAB	CREBBP	NaN	NaN	NaN	NaN
ELOTUZUMAB	CYLD	NaN	NaN	NaN	NaN
ELOTUZUMAB	DIS3	-4.07478	0.670304	5.73482	46.251
ELOTUZUMAB	DNMT3A	NaN	NaN	NaN	NaN
ELOTUZUMAB	DTX1	NaN	NaN	NaN	NaN
ELOTUZUMAB	DUSP2	1.21522	0.270913	10.4301	20.5894
ELOTUZUMAB	EGR1	NaN	NaN	NaN	NaN
ELOTUZUMAB	EP300	NaN	NaN	NaN	NaN
ELOTUZUMAB	FGFR3	NaN	NaN	NaN	NaN
ELOTUZUMAB	FUBP1	NaN	NaN	NaN	NaN
ELOTUZUMAB	HIST1H1B	NaN	NaN	NaN	NaN
ELOTUZUMAB	HIST1H1D	NaN	NaN	NaN	NaN
ELOTUZUMAB	HIST1H1E	NaN	NaN	NaN	NaN
ELOTUZUMAB	HIST1H2BK	NaN	NaN	NaN	NaN
ELOTUZUMAB	HUWE1	NaN	NaN	NaN	NaN
ELOTUZUMAB	IDH1	NaN	NaN	NaN	NaN
ELOTUZUMAB	IDH2	NaN	NaN	NaN	NaN
ELOTUZUMAB	IGLL5	NaN	NaN	NaN	NaN
ELOTUZUMAB	IRF4	NaN	NaN	NaN	NaN
ELOTUZUMAB	KDM5C	NaN	NaN	NaN	NaN
ELOTUZUMAB	KDM6A	NaN	NaN	NaN	NaN
ELOTUZUMAB	KLHL6	NaN	NaN	NaN	NaN
ELOTUZUMAB	KMT2B	-4.33926	0.434921	6.69778	31.7492
ELOTUZUMAB	KMT2C	NaN	NaN	NaN	NaN
ELOTUZUMAB	KRAS	4.14202	0.0634502	4.88567	4.88567
ELOTUZUMAB	LCE1D	NaN	NaN	NaN	NaN
ELOTUZUMAB	LTB	NaN	NaN	NaN	NaN
ELOTUZUMAB	MAF	NaN	NaN	NaN	NaN
ELOTUZUMAB	MAFB	NaN	NaN	NaN	NaN
ELOTUZUMAB	MAML2	NaN	NaN	NaN	NaN
ELOTUZUMAB	MAN2C1	NaN	NaN	NaN	NaN
ELOTUZUMAB	NCOR1	NaN	NaN	NaN	NaN
ELOTUZUMAB	NF1	NaN	NaN	NaN	NaN
ELOTUZUMAB	NFKB2	0.674848	0.469129	6.02049	33.7773
ELOTUZUMAB	NFKBIA	NaN	NaN	NaN	NaN
ELOTUZUMAB	NRAS	1.21522	0.270913	6.95343	20.3185
ELOTUZUMAB	PABPC1	NaN	NaN	NaN	NaN
ELOTUZUMAB	PIK3CA	NaN	NaN	NaN	NaN
ELOTUZUMAB	PIM1	NaN	NaN	NaN	NaN
ELOTUZUMAB	POT1	NaN	NaN	NaN	NaN
ELOTUZUMAB	PRDM1	0.674848	0.469129	5.16042	33.3081
ELOTUZUMAB	PRKD2	NaN	NaN	NaN	NaN
ELOTUZUMAB	PTPN11	NaN	NaN	NaN	NaN
ELOTUZUMAB	RASA2	NaN	NaN	NaN	NaN
ELOTUZUMAB	RB1	0.674848	0.469129	4.51536	32.839
ELOTUZUMAB	RFTN1	NaN	NaN	NaN	NaN
ELOTUZUMAB	RPL10	NaN	NaN	NaN	NaN
ELOTUZUMAB	RPL5	NaN	NaN	NaN	NaN
ELOTUZUMAB	RPRD1B	NaN	NaN	NaN	NaN
ELOTUZUMAB	RPS3A	NaN	NaN	NaN	NaN
ELOTUZUMAB	SAMHD1	NaN	NaN	NaN	NaN
ELOTUZUMAB	SETD2	NaN	NaN	NaN	NaN
ELOTUZUMAB	SF3B1	NaN	NaN	NaN	NaN
ELOTUZUMAB	SP140	NaN	NaN	NaN	NaN
ELOTUZUMAB	TCL1A	NaN	NaN	NaN	NaN
ELOTUZUMAB	TET2	NaN	NaN	NaN	NaN
ELOTUZUMAB	TGDS	NaN	NaN	NaN	NaN
ELOTUZUMAB	TP53	NaN	NaN	NaN	NaN
ELOTUZUMAB	TRAF2	NaN	NaN	NaN	NaN
ELOTUZUMAB	TRAF3	NaN	NaN	NaN	NaN
ELOTUZUMAB	UBR5	NaN	NaN	NaN	NaN
ELOTUZUMAB	XBP1	NaN	NaN	NaN	NaN
ELOTUZUMAB	ZFP36L1	NaN	NaN	NaN	NaN
ELOTUZUMAB	ZNF292	NaN	NaN	NaN	NaN
EN460	ABCF1	NaN	NaN	NaN	NaN
EN460	ACTG1	NaN	NaN	NaN	NaN
EN460	ARID1A	NaN	NaN	NaN	NaN
EN460	ARID2	NaN	NaN	NaN	NaN
EN460	ATM	NaN	NaN	NaN	NaN
EN460	ATRX	NaN	NaN	NaN	NaN
EN460	BCL7A	NaN	NaN	NaN	NaN
EN460	BHLHE41	NaN	NaN	NaN	NaN
EN460	BRAF	-15.6695	0.0232402	0.894748	1.76625
EN460	BTG1	NaN	NaN	NaN	NaN
EN460	CCND1	NaN	NaN	NaN	NaN
EN460	CDKN1B	NaN	NaN	NaN	NaN
EN460	CDKN2C	NaN	NaN	NaN	NaN
EN460	CREBBP	NaN	NaN	NaN	NaN
EN460	CYLD	NaN	NaN	NaN	NaN
EN460	DIS3	NaN	NaN	NaN	NaN
EN460	DNMT3A	NaN	NaN	NaN	NaN
EN460	DTX1	NaN	NaN	NaN	NaN
EN460	DUSP2	NaN	NaN	NaN	NaN
EN460	EGR1	NaN	NaN	NaN	NaN
EN460	EP300	NaN	NaN	NaN	NaN
EN460	FGFR3	NaN	NaN	NaN	NaN
EN460	FUBP1	NaN	NaN	NaN	NaN
EN460	HIST1H1B	NaN	NaN	NaN	NaN
EN460	HIST1H1D	NaN	NaN	NaN	NaN
EN460	HIST1H1E	NaN	NaN	NaN	NaN
EN460	HIST1H2BK	NaN	NaN	NaN	NaN
EN460	HUWE1	NaN	NaN	NaN	NaN
EN460	IDH1	NaN	NaN	NaN	NaN
EN460	IDH2	NaN	NaN	NaN	NaN
EN460	IGLL5	NaN	NaN	NaN	NaN
EN460	IRF4	NaN	NaN	NaN	NaN
EN460	KDM5C	NaN	NaN	NaN	NaN
EN460	KDM6A	NaN	NaN	NaN	NaN
EN460	KLHL6	NaN	NaN	NaN	NaN
EN460	KMT2B	NaN	NaN	NaN	NaN
EN460	KMT2C	NaN	NaN	NaN	NaN
EN460	KRAS	0.323509	0.579407	8.92287	42.2967
EN460	LCE1D	NaN	NaN	NaN	NaN
EN460	LTB	NaN	NaN	NaN	NaN
EN460	MAF	NaN	NaN	NaN	NaN
EN460	MAFB	NaN	NaN	NaN	NaN
EN460	MAML2	NaN	NaN	NaN	NaN
EN460	MAN2C1	NaN	NaN	NaN	NaN
EN460	NCOR1	NaN	NaN	NaN	NaN
EN460	NF1	NaN	NaN	NaN	NaN
EN460	NFKB2	NaN	NaN	NaN	NaN
EN460	NFKBIA	NaN	NaN	NaN	NaN
EN460	NRAS	NaN	NaN	NaN	NaN
EN460	PABPC1	NaN	NaN	NaN	NaN
EN460	PIK3CA	NaN	NaN	NaN	NaN
EN460	PIM1	NaN	NaN	NaN	NaN
EN460	POT1	-2.60764	0.891461	9.80607	63.2937
EN460	PRDM1	NaN	NaN	NaN	NaN
EN460	PRKD2	NaN	NaN	NaN	NaN
EN460	PTPN11	NaN	NaN	NaN	NaN
EN460	RASA2	NaN	NaN	NaN	NaN
EN460	RB1	-16.9573	0.00809878	0.623606	0.623606
EN460	RFTN1	NaN	NaN	NaN	NaN
EN460	RPL10	NaN	NaN	NaN	NaN
EN460	RPL5	NaN	NaN	NaN	NaN
EN460	RPRD1B	NaN	NaN	NaN	NaN
EN460	RPS3A	NaN	NaN	NaN	NaN
EN460	SAMHD1	NaN	NaN	NaN	NaN
EN460	SETD2	NaN	NaN	NaN	NaN
EN460	SF3B1	NaN	NaN	NaN	NaN
EN460	SP140	NaN	NaN	NaN	NaN
EN460	TCL1A	NaN	NaN	NaN	NaN
EN460	TET2	-1.34735	0.736213	9.44807	53.0073
EN460	TGDS	NaN	NaN	NaN	NaN
EN460	TP53	0.462477	0.56398	10.8566	41.7346
EN460	TRAF2	NaN	NaN	NaN	NaN
EN460	TRAF3	0.541651	0.549397	14.1012	41.2048
EN460	UBR5	NaN	NaN	NaN	NaN
EN460	XBP1	NaN	NaN	NaN	NaN
EN460	ZFP36L1	NaN	NaN	NaN	NaN
EN460	ZNF292	NaN	NaN	NaN	NaN
F8	ABCF1	NaN	NaN	NaN	NaN
F8	ACTG1	NaN	NaN	NaN	NaN
F8	ARID1A	NaN	NaN	NaN	NaN
F8	ARID2	NaN	NaN	NaN	NaN
F8	ATM	NaN	NaN	NaN	NaN
F8	ATRX	NaN	NaN	NaN	NaN
F8	BCL7A	NaN	NaN	NaN	NaN
F8	BHLHE41	NaN	NaN	NaN	NaN
F8	BRAF	NaN	NaN	NaN	NaN
F8	BTG1	NaN	NaN	NaN	NaN
F8	CCND1	NaN	NaN	NaN	NaN
F8	CDKN1B	NaN	NaN	NaN	NaN
F8	CDKN2C	NaN	NaN	NaN	NaN
F8	CREBBP	NaN	NaN	NaN	NaN
F8	CYLD	NaN	NaN	NaN	NaN
F8	DIS3	-0.608693	0.9421	14.5083	68.7733
F8	DNMT3A	NaN	NaN	NaN	NaN
F8	DTX1	NaN	NaN	NaN	NaN
F8	DUSP2	NaN	NaN	NaN	NaN
F8	EGR1	NaN	NaN	NaN	NaN
F8	EP300	-4.96276	0.596843	11.4892	44.1664
F8	FGFR3	NaN	NaN	NaN	NaN
F8	FUBP1	NaN	NaN	NaN	NaN
F8	HIST1H1B	NaN	NaN	NaN	NaN
F8	HIST1H1D	NaN	NaN	NaN	NaN
F8	HIST1H1E	NaN	NaN	NaN	NaN
F8	HIST1H2BK	NaN	NaN	NaN	NaN
F8	HUWE1	NaN	NaN	NaN	NaN
F8	IDH1	NaN	NaN	NaN	NaN
F8	IDH2	NaN	NaN	NaN	NaN
F8	IGLL5	NaN	NaN	NaN	NaN
F8	IRF4	NaN	NaN	NaN	NaN
F8	KDM5C	NaN	NaN	NaN	NaN
F8	KDM6A	NaN	NaN	NaN	NaN
F8	KLHL6	NaN	NaN	NaN	NaN
F8	KMT2B	NaN	NaN	NaN	NaN
F8	KMT2C	NaN	NaN	NaN	NaN
F8	KRAS	4.85622	0.320844	12.3525	24.3841
F8	LCE1D	NaN	NaN	NaN	NaN
F8	LTB	NaN	NaN	NaN	NaN
F8	MAF	NaN	NaN	NaN	NaN
F8	MAFB	NaN	NaN	NaN	NaN
F8	MAML2	NaN	NaN	NaN	NaN
F8	MAN2C1	NaN	NaN	NaN	NaN
F8	NCOR1	NaN	NaN	NaN	NaN
F8	NF1	-8.52562	0.441415	11.3297	33.1061
F8	NFKB2	NaN	NaN	NaN	NaN
F8	NFKBIA	NaN	NaN	NaN	NaN
F8	NRAS	NaN	NaN	NaN	NaN
F8	PABPC1	NaN	NaN	NaN	NaN
F8	PIK3CA	NaN	NaN	NaN	NaN
F8	PIM1	NaN	NaN	NaN	NaN
F8	POT1	NaN	NaN	NaN	NaN
F8	PRDM1	-17.0088	0.0465687	3.58579	3.58579
F8	PRKD2	NaN	NaN	NaN	NaN
F8	PTPN11	NaN	NaN	NaN	NaN
F8	RASA2	NaN	NaN	NaN	NaN
F8	RB1	NaN	NaN	NaN	NaN
F8	RFTN1	NaN	NaN	NaN	NaN
F8	RPL10	NaN	NaN	NaN	NaN
F8	RPL5	NaN	NaN	NaN	NaN
F8	RPRD1B	NaN	NaN	NaN	NaN
F8	RPS3A	NaN	NaN	NaN	NaN
F8	SAMHD1	NaN	NaN	NaN	NaN
F8	SETD2	NaN	NaN	NaN	NaN
F8	SF3B1	NaN	NaN	NaN	NaN
F8	SP140	NaN	NaN	NaN	NaN
F8	TCL1A	NaN	NaN	NaN	NaN
F8	TET2	NaN	NaN	NaN	NaN
F8	TGDS	NaN	NaN	NaN	NaN
F8	TP53	NaN	NaN	NaN	NaN
F8	TRAF2	NaN	NaN	NaN	NaN
F8	TRAF3	NaN	NaN	NaN	NaN
F8	UBR5	NaN	NaN	NaN	NaN
[truncated: 3,468 more rows]

## Sheet: Mutations_Driver_LD50_LD20
DrugName	Mutation	LD50_log2_Fold_Change	LD50_Nominal_p_value	LD20_log2_Fold_Change	LD20_Nominal_p_value	LD50_FDR_q_value	LD50_FWER_q_value	LD20_FDR_q_value	LD20_FWER_q_value
A-1210477	ABCF1	NaN	NaN	NaN	NaN	NaN	NaN	NaN	NaN
A-1210477	ACTG1	NaN	NaN	NaN	NaN	NaN	NaN	NaN	NaN
A-1210477	ARID1A	NaN	NaN	NaN	NaN	NaN	NaN	NaN	NaN
A-1210477	ARID2	NaN	NaN	1.42296	0.77349	NaN	NaN	8.50839	54.9178
A-1210477	ATM	NaN	NaN	NaN	NaN	NaN	NaN	NaN	NaN
A-1210477	ATRX	NaN	NaN	NaN	NaN	NaN	NaN	NaN	NaN
A-1210477	BCL7A	NaN	NaN	NaN	NaN	NaN	NaN	NaN	NaN
A-1210477	BHLHE41	NaN	NaN	NaN	NaN	NaN	NaN	NaN	NaN
A-1210477	BRAF	NaN	NaN	NaN	NaN	NaN	NaN	NaN	NaN
A-1210477	BTG1	NaN	NaN	NaN	NaN	NaN	NaN	NaN	NaN
A-1210477	CCND1	NaN	NaN	NaN	NaN	NaN	NaN	NaN	NaN
A-1210477	CDKN1B	NaN	NaN	NaN	NaN	NaN	NaN	NaN	NaN
A-1210477	CDKN2C	NaN	NaN	NaN	NaN	NaN	NaN	NaN	NaN
A-1210477	CREBBP	NaN	NaN	NaN	NaN	NaN	NaN	NaN	NaN
A-1210477	CYLD	NaN	NaN	NaN	NaN	NaN	NaN	NaN	NaN
A-1210477	DIS3	NaN	NaN	NaN	NaN	NaN	NaN	NaN	NaN
A-1210477	DNMT3A	NaN	NaN	NaN	NaN	NaN	NaN	NaN	NaN
A-1210477	DTX1	NaN	NaN	NaN	NaN	NaN	NaN	NaN	NaN
A-1210477	DUSP2	NaN	NaN	NaN	NaN	NaN	NaN	NaN	NaN
A-1210477	EGR1	NaN	NaN	NaN	NaN	NaN	NaN	NaN	NaN
A-1210477	EP300	0.416518	NaN	-0.523667	0.655271	NaN	NaN	12.614	48.49
A-1210477	FGFR3	NaN	NaN	NaN	NaN	NaN	NaN	NaN	NaN
A-1210477	FUBP1	NaN	NaN	NaN	NaN	NaN	NaN	NaN	NaN
A-1210477	HIST1H1B	NaN	NaN	NaN	NaN	NaN	NaN	NaN	NaN
A-1210477	HIST1H1D	NaN	NaN	NaN	NaN	NaN	NaN	NaN	NaN
A-1210477	HIST1H1E	NaN	NaN	NaN	NaN	NaN	NaN	NaN	NaN
A-1210477	HIST1H2BK	NaN	NaN	NaN	NaN	NaN	NaN	NaN	NaN
A-1210477	HUWE1	NaN	NaN	NaN	NaN	NaN	NaN	NaN	NaN
A-1210477	IDH1	NaN	NaN	NaN	NaN	NaN	NaN	NaN	NaN
A-1210477	IDH2	NaN	NaN	NaN	NaN	NaN	NaN	NaN	NaN
A-1210477	IGLL5	NaN	NaN	-1.96626	0.266674	NaN	NaN	10.267	20.2673
A-1210477	IRF4	NaN	NaN	NaN	NaN	NaN	NaN	NaN	NaN
A-1210477	KDM5C	NaN	NaN	NaN	NaN	NaN	NaN	NaN	NaN
A-1210477	KDM6A	NaN	NaN	0.523667	0.800852	NaN	NaN	6.85174	55.2588
A-1210477	KLHL6	NaN	NaN	NaN	NaN	NaN	NaN	NaN	NaN
A-1210477	KMT2B	NaN	NaN	NaN	NaN	NaN	NaN	NaN	NaN
A-1210477	KMT2C	NaN	NaN	1.42296	0.77349	NaN	NaN	7.44484	54.1443
A-1210477	KRAS	NaN	NaN	-1.96626	0.266674	NaN	NaN	6.84464	20.0006
A-1210477	LCE1D	NaN	NaN	NaN	NaN	NaN	NaN	NaN	NaN
A-1210477	LTB	NaN	NaN	NaN	NaN	NaN	NaN	NaN	NaN
A-1210477	MAF	NaN	NaN	NaN	NaN	NaN	NaN	NaN	NaN
A-1210477	MAFB	NaN	NaN	NaN	NaN	NaN	NaN	NaN	NaN
A-1210477	MAML2	NaN	NaN	NaN	NaN	NaN	NaN	NaN	NaN
A-1210477	MAN2C1	NaN	NaN	NaN	NaN	NaN	NaN	NaN	NaN
A-1210477	NCOR1	NaN	NaN	NaN	NaN	NaN	NaN	NaN	NaN
A-1210477	NF1	NaN	NaN	NaN	NaN	NaN	NaN	NaN	NaN
A-1210477	NFKB2	NaN	NaN	NaN	NaN	NaN	NaN	NaN	NaN
A-1210477	NFKBIA	NaN	NaN	NaN	NaN	NaN	NaN	NaN	NaN
A-1210477	NRAS	NaN	NaN	NaN	NaN	NaN	NaN	NaN	NaN
A-1210477	PABPC1	NaN	NaN	NaN	NaN	NaN	NaN	NaN	NaN
A-1210477	PIK3CA	NaN	NaN	NaN	NaN	NaN	NaN	NaN	NaN
A-1210477	PIM1	NaN	NaN	NaN	NaN	NaN	NaN	NaN	NaN
A-1210477	POT1	NaN	NaN	NaN	NaN	NaN	NaN	NaN	NaN
A-1210477	PRDM1	NaN	NaN	NaN	NaN	NaN	NaN	NaN	NaN
A-1210477	PRKD2	NaN	NaN	NaN	NaN	NaN	NaN	NaN	NaN
A-1210477	PTPN11	NaN	NaN	NaN	NaN	NaN	NaN	NaN	NaN
A-1210477	RASA2	NaN	NaN	2.5861	0.0103586	NaN	NaN	0.797614	0.797614
A-1210477	RB1	NaN	NaN	NaN	NaN	NaN	NaN	NaN	NaN
A-1210477	RFTN1	NaN	NaN	NaN	NaN	NaN	NaN	NaN	NaN
A-1210477	RPL10	NaN	NaN	NaN	NaN	NaN	NaN	NaN	NaN
A-1210477	RPL5	NaN	NaN	NaN	NaN	NaN	NaN	NaN	NaN
A-1210477	RPRD1B	NaN	NaN	NaN	NaN	NaN	NaN	NaN	NaN
A-1210477	RPS3A	NaN	NaN	NaN	NaN	NaN	NaN	NaN	NaN
A-1210477	SAMHD1	NaN	NaN	NaN	NaN	NaN	NaN	NaN	NaN
A-1210477	SETD2	NaN	NaN	NaN	NaN	NaN	NaN	NaN	NaN
A-1210477	SF3B1	NaN	NaN	NaN	NaN	NaN	NaN	NaN	NaN
A-1210477	SP140	NaN	NaN	NaN	NaN	NaN	NaN	NaN	NaN
A-1210477	TCL1A	NaN	NaN	NaN	NaN	NaN	NaN	NaN	NaN
A-1210477	TET2	0.416518	NaN	-0.523667	0.655271	NaN	NaN	10.0912	47.8348
A-1210477	TGDS	NaN	NaN	NaN	NaN	NaN	NaN	NaN	NaN
A-1210477	TP53	NaN	NaN	NaN	NaN	NaN	NaN	NaN	NaN
A-1210477	TRAF2	NaN	NaN	NaN	NaN	NaN	NaN	NaN	NaN
A-1210477	TRAF3	0.416518	NaN	-0.523667	0.655271	NaN	NaN	8.40931	47.1795
A-1210477	UBR5	NaN	NaN	NaN	NaN	NaN	NaN	NaN	NaN
A-1210477	XBP1	NaN	NaN	NaN	NaN	NaN	NaN	NaN	NaN
A-1210477	ZFP36L1	NaN	NaN	NaN	NaN	NaN	NaN	NaN	NaN
A-1210477	ZNF292	NaN	NaN	NaN	NaN	NaN	NaN	NaN	NaN
ABT-199	ABCF1	NaN	NaN	NaN	NaN	NaN	NaN	NaN	NaN
ABT-199	ACTG1	NaN	NaN	-3.25124	0.261458	NaN	NaN	1.67769	17.2562
ABT-199	ARID1A	NaN	NaN	-3.51105	0.649818	NaN	NaN	1.4296	27.9422
ABT-199	ARID2	0.353879	0.944096	-0.724147	0.370506	2.01932	39.652	1.58494	22.2304
ABT-199	ATM	NaN	NaN	1.27385	0.825471	NaN	NaN	1.47817	28.8915
ABT-199	ATRX	NaN	NaN	NaN	NaN	NaN	NaN	NaN	NaN
ABT-199	BCL7A	1.18249	0.123849	-3.35398	0.259913	3.17878	9.28864	2.00133	17.6741
ABT-199	BHLHE41	NaN	NaN	NaN	NaN	NaN	NaN	NaN	NaN
ABT-199	BRAF	0.503008	0.847026	1.05572	0.49913	1.91826	37.2691	1.37261	24.9565
ABT-199	BTG1	-2.34562	0.298148	-4.39573	0.419172	2.29574	20.274	1.40331	23.0544
ABT-199	CCND1	1.04975	0.395595	1.12343	0.863275	2.03072	24.9225	1.4143	26.7615
ABT-199	CDKN1B	NaN	NaN	NaN	NaN	NaN	NaN	NaN	NaN
ABT-199	CDKN2C	NaN	NaN	NaN	NaN	NaN	NaN	NaN	NaN
ABT-199	CREBBP	-0.46886	0.718881	-3.28177	0.194654	1.97692	35.9441	2.49806	14.0151
ABT-199	CYLD	-1.77506	0.358012	-1.97836	0.839333	2.29724	23.6288	1.43619	27.698
ABT-199	DIS3	-2.73853	0.271108	2.93071	0.0450109	2.31948	18.7065	3.46584	3.46584
ABT-199	DNMT3A	NaN	NaN	NaN	NaN	NaN	NaN	NaN	NaN
ABT-199	DTX1	0.711431	0.687945	-3.98708	0.422207	1.96192	35.0852	1.35458	22.7992
ABT-199	DUSP2	0.46886	0.88607	-1.39025	0.902435	1.94935	38.101	1.38975	25.2682
ABT-199	EGR1	NaN	NaN	2.02902	0.483455	NaN	NaN	1.37874	24.6562
ABT-199	EP300	NaN	NaN	1.71865	0.888518	NaN	NaN	1.42533	26.6555
ABT-199	FGFR3	NaN	NaN	1.3039	0.968753	NaN	NaN	1.4345	25.1876
ABT-199	FUBP1	NaN	NaN	-0.621379	0.381639	NaN	NaN	1.46931	22.1351
ABT-199	HIST1H1B	NaN	NaN	NaN	NaN	NaN	NaN	NaN	NaN
ABT-199	HIST1H1D	0.872402	0.394374	-0.696978	0.373354	2.16906	25.2399	1.51307	22.0279
ABT-199	HIST1H1E	0.98587	0.449829	0.346987	0.812029	1.92427	26.9897	1.48872	29.233
ABT-199	HIST1H2BK	NaN	NaN	NaN	NaN	NaN	NaN	NaN	NaN
ABT-199	HUWE1	NaN	NaN	2.1594	0.628132	NaN	NaN	1.46564	28.2659
ABT-199	IDH1	NaN	NaN	NaN	NaN	NaN	NaN	NaN	NaN
ABT-199	IDH2	NaN	NaN	NaN	NaN	NaN	NaN	NaN	NaN
ABT-199	IGLL5	-2.11102	0.123944	-0.901396	0.6614	2.38593	9.17189	1.41466	27.7788
ABT-199	IRF4	-5.4755	0.205648	2.06127	0.415058	2.26212	14.601	1.4527	23.2433
ABT-199	KDM5C	NaN	NaN	NaN	NaN	NaN	NaN	NaN	NaN
ABT-199	KDM6A	1.04975	0.395595	-2.51134	0.320229	1.9038	24.5269	1.64384	20.1744
ABT-199	KLHL6	-0.313728	0.775764	-3.37866	0.260029	1.99113	37.2367	1.8202	17.4219
ABT-199	KMT2B	NaN	NaN	3.60407	0.0715016	NaN	NaN	2.75281	5.43412
ABT-199	KMT2C	-0.995308	0.511113	-3.56043	0.605182	1.71112	28.1112	1.45622	27.8384
ABT-199	KRAS	-0.458901	0.381727	-1.31944	0.842889	2.261	24.8122	1.41092	26.9725
ABT-199	LCE1D	NaN	NaN	NaN	NaN	NaN	NaN	NaN	NaN
ABT-199	LTB	0.780853	0.463506	1.08173	0.950918	1.62227	25.9564	1.4357	25.6748
ABT-199	MAF	NaN	NaN	1.87648	0.838333	NaN	NaN	1.46708	28.5033
ABT-199	MAFB	NaN	NaN	NaN	NaN	NaN	NaN	NaN	NaN
ABT-199	MAML2	1.40658	0.139358	0.259696	0.636665	2.14611	10.1731	1.44186	28.0133
ABT-199	MAN2C1	NaN	NaN	NaN	NaN	NaN	NaN	NaN	NaN
ABT-199	NCOR1	0.98587	0.305926	-2.54818	0.246295	2.14148	20.497	2.70924	17.4869
ABT-199	NF1	0.98587	0.449829	2.75398	0.553886	1.82299	26.5399	1.42164	26.5865
ABT-199	NFKB2	1.04975	0.395595	0.738081	0.454667	1.79181	24.1313	1.40037	24.0973
ABT-199	NFKBIA	NaN	NaN	NaN	NaN	NaN	NaN	NaN	NaN
ABT-199	NRAS	-2.49079	0.183309	0.953997	0.987073	2.35247	13.1982	1.43405	24.6768
ABT-199	PABPC1	NaN	NaN	NaN	NaN	NaN	NaN	NaN	NaN
ABT-199	PIK3CA	NaN	NaN	2.33005	0.254903	NaN	NaN	2.18084	17.5883
ABT-199	PIM1	NaN	NaN	NaN	NaN	NaN	NaN	NaN	NaN
ABT-199	POT1	NaN	NaN	0.701015	0.351286	NaN	NaN	1.59112	21.4284
ABT-199	PRDM1	NaN	NaN	-1.49004	0.481669	NaN	NaN	1.42648	25.0468
ABT-199	PRKD2	-0.313728	0.775764	0.958048	0.779184	1.9269	36.4609	1.49993	29.609
ABT-199	PTPN11	1.51091	0.0881805	2.49461	0.172689	6.7899	6.7899	2.65941	12.6063
ABT-199	RASA2	NaN	NaN	1.93481	0.560538	NaN	NaN	1.3923	26.3453
ABT-199	RB1	0.718284	0.68208	0.070507	0.311577	2.02001	35.4682	1.71367	19.9409
ABT-199	RFTN1	NaN	NaN	NaN	NaN	NaN	NaN	NaN	NaN
ABT-199	RPL10	NaN	NaN	1.71865	0.888518	NaN	NaN	1.39624	25.767
ABT-199	RPL5	1.26631	0.227375	-2.56558	0.698164	2.18849	15.9163	1.45294	28.6247
ABT-199	RPRD1B	NaN	NaN	NaN	NaN	NaN	NaN	NaN	NaN
ABT-199	RPS3A	NaN	NaN	NaN	NaN	NaN	NaN	NaN	NaN
ABT-199	SAMHD1	NaN	NaN	NaN	NaN	NaN	NaN	NaN	NaN
ABT-199	SETD2	0.543525	0.734836	0.346987	0.324426	1.95112	36.007	1.5613	20.1144
ABT-199	SF3B1	-2.61494	0.118874	-4.48775	0.248712	4.57665	9.03442	2.39385	17.4098
ABT-199	SP140	0.98587	0.449829	3.36163	0.098601	1.73184	26.0901	2.53076	7.39507
ABT-199	TCL1A	NaN	NaN	NaN	NaN	NaN	NaN	NaN	NaN
ABT-199	TET2	-0.23349	0.639485	1.3932	0.78027	2.05168	34.5322	1.46538	28.87
ABT-199	TGDS	-0.23349	0.812525	0.990163	0.503467	1.89589	36.5636	1.33679	24.6699
ABT-199	TP53	0.98587	0.449829	2.5615	0.388834	1.64937	25.6403	1.42572	22.1635
ABT-199	TRAF2	NaN	NaN	1.50093	0.762125	NaN	NaN	1.50471	29.7229
ABT-199	TRAF3	0.500271	0.78396	2.8492	0.717175	1.8864	36.0622	1.45322	28.687
ABT-199	UBR5	NaN	NaN	3.05591	0.104418	NaN	NaN	2.01004	7.72692
ABT-199	XBP1	NaN	NaN	NaN	NaN	NaN	NaN	NaN	NaN
ABT-199	ZFP36L1	NaN	NaN	NaN	NaN	NaN	NaN	NaN	NaN
ABT-199	ZNF292	0.637024	0.659747	-3.2293	0.261804	2.03202	34.9666	1.55068	17.0172
ADAVOSERTIB	ABCF1	NaN	NaN	NaN	NaN	NaN	NaN	NaN	NaN
ADAVOSERTIB	ACTG1	NaN	NaN	NaN	NaN	NaN	NaN	NaN	NaN
ADAVOSERTIB	ARID1A	NaN	NaN	NaN	NaN	NaN	NaN	NaN	NaN
ADAVOSERTIB	ARID2	NaN	NaN	NaN	NaN	NaN	NaN	NaN	NaN
ADAVOSERTIB	ATM	NaN	NaN	NaN	NaN	NaN	NaN	NaN	NaN
ADAVOSERTIB	ATRX	NaN	NaN	NaN	NaN	NaN	NaN	NaN	NaN
ADAVOSERTIB	BCL7A	NaN	NaN	NaN	NaN	NaN	NaN	NaN	NaN
ADAVOSERTIB	BHLHE41	NaN	NaN	NaN	NaN	NaN	NaN	NaN	NaN
ADAVOSERTIB	BRAF	NaN	NaN	NaN	NaN	NaN	NaN	NaN	NaN
ADAVOSERTIB	BTG1	NaN	NaN	NaN	NaN	NaN	NaN	NaN	NaN
ADAVOSERTIB	CCND1	NaN	NaN	NaN	NaN	NaN	NaN	NaN	NaN
ADAVOSERTIB	CDKN1B	NaN	NaN	NaN	NaN	NaN	NaN	NaN	NaN
ADAVOSERTIB	CDKN2C	NaN	NaN	NaN	NaN	NaN	NaN	NaN	NaN
ADAVOSERTIB	CREBBP	NaN	NaN	NaN	NaN	NaN	NaN	NaN	NaN
ADAVOSERTIB	CYLD	NaN	NaN	NaN	NaN	NaN	NaN	NaN	NaN
ADAVOSERTIB	DIS3	NaN	NaN	6.67111	0.12405	NaN	NaN	4.77593	9.42781
ADAVOSERTIB	DNMT3A	NaN	NaN	NaN	NaN	NaN	NaN	NaN	NaN
ADAVOSERTIB	DTX1	NaN	NaN	NaN	NaN	NaN	NaN	NaN	NaN
ADAVOSERTIB	DUSP2	NaN	NaN	NaN	NaN	NaN	NaN	NaN	NaN
ADAVOSERTIB	EGR1	NaN	NaN	NaN	NaN	NaN	NaN	NaN	NaN
ADAVOSERTIB	EP300	NaN	NaN	5.48302	0.615474	NaN	NaN	9.47829	44.9296
ADAVOSERTIB	FGFR3	NaN	NaN	NaN	NaN	NaN	NaN	NaN	NaN
ADAVOSERTIB	FUBP1	NaN	NaN	NaN	NaN	NaN	NaN	NaN	NaN
ADAVOSERTIB	HIST1H1B	NaN	NaN	NaN	NaN	NaN	NaN	NaN	NaN
ADAVOSERTIB	HIST1H1D	NaN	NaN	NaN	NaN	NaN	NaN	NaN	NaN
ADAVOSERTIB	HIST1H1E	NaN	NaN	NaN	NaN	NaN	NaN	NaN	NaN
ADAVOSERTIB	HIST1H2BK	NaN	NaN	NaN	NaN	NaN	NaN	NaN	NaN
ADAVOSERTIB	HUWE1	NaN	NaN	NaN	NaN	NaN	NaN	NaN	NaN
ADAVOSERTIB	IDH1	NaN	NaN	NaN	NaN	NaN	NaN	NaN	NaN
ADAVOSERTIB	IDH2	NaN	NaN	NaN	NaN	NaN	NaN	NaN	NaN
ADAVOSERTIB	IGLL5	NaN	NaN	NaN	NaN	NaN	NaN	NaN	NaN
ADAVOSERTIB	IRF4	NaN	NaN	NaN	NaN	NaN	NaN	NaN	NaN
ADAVOSERTIB	KDM5C	NaN	NaN	NaN	NaN	NaN	NaN	NaN	NaN
ADAVOSERTIB	KDM6A	NaN	NaN	NaN	NaN	NaN	NaN	NaN	NaN
ADAVOSERTIB	KLHL6	NaN	NaN	NaN	NaN	NaN	NaN	NaN	NaN
ADAVOSERTIB	KMT2B	NaN	NaN	NaN	NaN	NaN	NaN	NaN	NaN
ADAVOSERTIB	KMT2C	NaN	NaN	NaN	NaN	NaN	NaN	NaN	NaN
ADAVOSERTIB	KRAS	NaN	NaN	6.6684	0.00491321	NaN	NaN	0.378317	0.378317
ADAVOSERTIB	LCE1D	NaN	NaN	NaN	NaN	NaN	NaN	NaN	NaN
ADAVOSERTIB	LTB	NaN	NaN	NaN	NaN	NaN	NaN	NaN	NaN
ADAVOSERTIB	MAF	NaN	NaN	NaN	NaN	NaN	NaN	NaN	NaN
ADAVOSERTIB	MAFB	NaN	NaN	NaN	NaN	NaN	NaN	NaN	NaN
ADAVOSERTIB	MAML2	NaN	NaN	NaN	NaN	NaN	NaN	NaN	NaN
ADAVOSERTIB	MAN2C1	NaN	NaN	NaN	NaN	NaN	NaN	NaN	NaN
ADAVOSERTIB	NCOR1	NaN	NaN	NaN	NaN	NaN	NaN	NaN	NaN
ADAVOSERTIB	NF1	NaN	NaN	-5.41048	0.506148	NaN	NaN	9.74335	37.455
ADAVOSERTIB	NFKB2	NaN	NaN	NaN	NaN	NaN	NaN	NaN	NaN
ADAVOSERTIB	NFKBIA	NaN	NaN	NaN	NaN	NaN	NaN	NaN	NaN
ADAVOSERTIB	NRAS	NaN	NaN	NaN	NaN	NaN	NaN	NaN	NaN
ADAVOSERTIB	PABPC1	NaN	NaN	NaN	NaN	NaN	NaN	NaN	NaN
ADAVOSERTIB	PIK3CA	NaN	NaN	NaN	NaN	NaN	NaN	NaN	NaN
ADAVOSERTIB	PIM1	NaN	NaN	NaN	NaN	NaN	NaN	NaN	NaN
ADAVOSERTIB	POT1	NaN	NaN	NaN	NaN	NaN	NaN	NaN	NaN
ADAVOSERTIB	PRDM1	NaN	NaN	-5.51301	0.505356	NaN	NaN	12.9708	37.9017
ADAVOSERTIB	PRKD2	NaN	NaN	NaN	NaN	NaN	NaN	NaN	NaN
ADAVOSERTIB	PTPN11	NaN	NaN	NaN	NaN	NaN	NaN	NaN	NaN
ADAVOSERTIB	RASA2	NaN	NaN	NaN	NaN	NaN	NaN	NaN	NaN
ADAVOSERTIB	RB1	NaN	NaN	NaN	NaN	NaN	NaN	NaN	NaN
ADAVOSERTIB	RFTN1	NaN	NaN	NaN	NaN	NaN	NaN	NaN	NaN
ADAVOSERTIB	RPL10	NaN	NaN	NaN	NaN	NaN	NaN	NaN	NaN
ADAVOSERTIB	RPL5	NaN	NaN	NaN	NaN	NaN	NaN	NaN	NaN
ADAVOSERTIB	RPRD1B	NaN	NaN	NaN	NaN	NaN	NaN	NaN	NaN
ADAVOSERTIB	RPS3A	NaN	NaN	NaN	NaN	NaN	NaN	NaN	NaN
ADAVOSERTIB	SAMHD1	NaN	NaN	NaN	NaN	NaN	NaN	NaN	NaN
ADAVOSERTIB	SETD2	NaN	NaN	NaN	NaN	NaN	NaN	NaN	NaN
ADAVOSERTIB	SF3B1	NaN	NaN	NaN	NaN	NaN	NaN	NaN	NaN
ADAVOSERTIB	SP140	NaN	NaN	NaN	NaN	NaN	NaN	NaN	NaN
ADAVOSERTIB	TCL1A	NaN	NaN	NaN	NaN	NaN	NaN	NaN	NaN
ADAVOSERTIB	TET2	NaN	NaN	NaN	NaN	NaN	NaN	NaN	NaN
ADAVOSERTIB	TGDS	NaN	NaN	NaN	NaN	NaN	NaN	NaN	NaN
ADAVOSERTIB	TP53	NaN	NaN	NaN	NaN	NaN	NaN	NaN	NaN
ADAVOSERTIB	TRAF2	NaN	NaN	NaN	NaN	NaN	NaN	NaN	NaN
ADAVOSERTIB	TRAF3	NaN	NaN	NaN	NaN	NaN	NaN	NaN	NaN
ADAVOSERTIB	UBR5	NaN	NaN	NaN	NaN	NaN	NaN	NaN	NaN
ADAVOSERTIB	XBP1	NaN	NaN	NaN	NaN	NaN	NaN	NaN	NaN
ADAVOSERTIB	ZFP36L1	NaN	NaN	NaN	NaN	NaN	NaN	NaN	NaN
ADAVOSERTIB	ZNF292	NaN	NaN	NaN	NaN	NaN	NaN	NaN	NaN
ALISERTIB	ABCF1	NaN	NaN	NaN	NaN	NaN	NaN	NaN	NaN
ALISERTIB	ACTG1	NaN	NaN	NaN	NaN	NaN	NaN	NaN	NaN
ALISERTIB	ARID1A	NaN	NaN	NaN	NaN	NaN	NaN	NaN	NaN
ALISERTIB	ARID2	NaN	NaN	NaN	NaN	NaN	NaN	NaN	NaN
ALISERTIB	ATM	NaN	NaN	NaN	NaN	NaN	NaN	NaN	NaN
ALISERTIB	ATRX	NaN	NaN	NaN	NaN	NaN	NaN	NaN	NaN
ALISERTIB	BCL7A	NaN	NaN	NaN	NaN	NaN	NaN	NaN	NaN
ALISERTIB	BHLHE41	NaN	NaN	NaN	NaN	NaN	NaN	NaN	NaN
ALISERTIB	BRAF	NaN	NaN	-0.730617	0.487291	NaN	NaN	12.5071	36.5469
ALISERTIB	BTG1	NaN	NaN	NaN	NaN	NaN	NaN	NaN	NaN
ALISERTIB	CCND1	NaN	NaN	NaN	NaN	NaN	NaN	NaN	NaN
ALISERTIB	CDKN1B	NaN	NaN	NaN	NaN	NaN	NaN	NaN	NaN
ALISERTIB	CDKN2C	NaN	NaN	NaN	NaN	NaN	NaN	NaN	NaN
ALISERTIB	CREBBP	NaN	NaN	NaN	NaN	NaN	NaN	NaN	NaN
ALISERTIB	CYLD	NaN	NaN	-2.79933	0.00422194	NaN	NaN	0.325089	0.325089
ALISERTIB	DIS3	NaN	NaN	NaN	NaN	NaN	NaN	NaN	NaN
ALISERTIB	DNMT3A	NaN	NaN	NaN	NaN	NaN	NaN	NaN	NaN
ALISERTIB	DTX1	NaN	NaN	NaN	NaN	NaN	NaN	NaN	NaN
ALISERTIB	DUSP2	NaN	NaN	NaN	NaN	NaN	NaN	NaN	NaN
ALISERTIB	EGR1	NaN	NaN	NaN	NaN	NaN	NaN	NaN	NaN
ALISERTIB	EP300	NaN	NaN	NaN	NaN	NaN	NaN	NaN	NaN
ALISERTIB	FGFR3	NaN	NaN	NaN	NaN	NaN	NaN	NaN	NaN
ALISERTIB	FUBP1	NaN	NaN	NaN	NaN	NaN	NaN	NaN	NaN
ALISERTIB	HIST1H1B	NaN	NaN	NaN	NaN	NaN	NaN	NaN	NaN
ALISERTIB	HIST1H1D	NaN	NaN	NaN	NaN	NaN	NaN	NaN	NaN
ALISERTIB	HIST1H1E	NaN	NaN	NaN	NaN	NaN	NaN	NaN	NaN
ALISERTIB	HIST1H2BK	NaN	NaN	NaN	NaN	NaN	NaN	NaN	NaN
ALISERTIB	HUWE1	NaN	NaN	NaN	NaN	NaN	NaN	NaN	NaN
ALISERTIB	IDH1	NaN	NaN	NaN	NaN	NaN	NaN	NaN	NaN
ALISERTIB	IDH2	NaN	NaN	NaN	NaN	NaN	NaN	NaN	NaN
ALISERTIB	IGLL5	NaN	NaN	NaN	NaN	NaN	NaN	NaN	NaN
ALISERTIB	IRF4	NaN	NaN	NaN	NaN	NaN	NaN	NaN	NaN
ALISERTIB	KDM5C	NaN	NaN	NaN	NaN	NaN	NaN	NaN	NaN
ALISERTIB	KDM6A	NaN	NaN	NaN	NaN	NaN	NaN	NaN	NaN
ALISERTIB	KLHL6	NaN	NaN	NaN	NaN	NaN	NaN	NaN	NaN
ALISERTIB	KMT2B	NaN	NaN	NaN	NaN	NaN	NaN	NaN	NaN
ALISERTIB	KMT2C	NaN	NaN	-0.277033	0.990679	NaN	NaN	12.7137	71.3289
ALISERTIB	KRAS	NaN	NaN	-0.407771	0.522169	NaN	NaN	10.0517	38.6405
ALISERTIB	LCE1D	NaN	NaN	NaN	NaN	NaN	NaN	NaN	NaN
ALISERTIB	LTB	NaN	NaN	0.16857	0.734044	NaN	NaN	11.3043	53.5852
ALISERTIB	MAF	NaN	NaN	NaN	NaN	NaN	NaN	NaN	NaN
ALISERTIB	MAFB	NaN	NaN	NaN	NaN	NaN	NaN	NaN	NaN
ALISERTIB	MAML2	NaN	NaN	NaN	NaN	NaN	NaN	NaN	NaN
ALISERTIB	MAN2C1	NaN	NaN	NaN	NaN	NaN	NaN	NaN	NaN
ALISERTIB	NCOR1	NaN	NaN	NaN	NaN	NaN	NaN	NaN	NaN
ALISERTIB	NF1	NaN	NaN	NaN	NaN	NaN	NaN	NaN	NaN
ALISERTIB	NFKB2	NaN	NaN	NaN	NaN	NaN	NaN	NaN	NaN
ALISERTIB	NFKBIA	NaN	NaN	NaN	NaN	NaN	NaN	NaN	NaN
ALISERTIB	NRAS	NaN	NaN	-0.277033	0.990679	NaN	NaN	10.8975	70.3382
ALISERTIB	PABPC1	NaN	NaN	NaN	NaN	NaN	NaN	NaN	NaN
ALISERTIB	PIK3CA	NaN	NaN	NaN	NaN	NaN	NaN	NaN	NaN
ALISERTIB	PIM1	NaN	NaN	0.728245	0.179467	NaN	NaN	6.90949	13.6395
ALISERTIB	POT1	NaN	NaN	NaN	NaN	NaN	NaN	NaN	NaN
ALISERTIB	PRDM1	NaN	NaN	NaN	NaN	NaN	NaN	NaN	NaN
ALISERTIB	PRKD2	NaN	NaN	NaN	NaN	NaN	NaN	NaN	NaN
ALISERTIB	PTPN11	NaN	NaN	NaN	NaN	NaN	NaN	NaN	NaN
ALISERTIB	RASA2	NaN	NaN	NaN	NaN	NaN	NaN	NaN	NaN
ALISERTIB	RB1	NaN	NaN	NaN	NaN	NaN	NaN	NaN	NaN
ALISERTIB	RFTN1	NaN	NaN	NaN	NaN	NaN	NaN	NaN	NaN
ALISERTIB	RPL10	NaN	NaN	NaN	NaN	NaN	NaN	NaN	NaN
ALISERTIB	RPL5	NaN	NaN	NaN	NaN	NaN	NaN	NaN	NaN
ALISERTIB	RPRD1B	NaN	NaN	NaN	NaN	NaN	NaN	NaN	NaN
ALISERTIB	RPS3A	NaN	NaN	NaN	NaN	NaN	NaN	NaN	NaN
ALISERTIB	SAMHD1	NaN	NaN	NaN	NaN	NaN	NaN	NaN	NaN
ALISERTIB	SETD2	NaN	NaN	NaN	NaN	NaN	NaN	NaN	NaN
ALISERTIB	SF3B1	NaN	NaN	NaN	NaN	NaN	NaN	NaN	NaN
ALISERTIB	SP140	NaN	NaN	NaN	NaN	NaN	NaN	NaN	NaN
ALISERTIB	TCL1A	NaN	NaN	NaN	NaN	NaN	NaN	NaN	NaN
ALISERTIB	TET2	NaN	NaN	NaN	NaN	NaN	NaN	NaN	NaN
ALISERTIB	TGDS	NaN	NaN	NaN	NaN	NaN	NaN	NaN	NaN
ALISERTIB	TP53	NaN	NaN	NaN	NaN	NaN	NaN	NaN	NaN
ALISERTIB	TRAF2	NaN	NaN	NaN	NaN	NaN	NaN	NaN	NaN
ALISERTIB	TRAF3	NaN	NaN	NaN	NaN	NaN	NaN	NaN	NaN
ALISERTIB	UBR5	NaN	NaN	NaN	NaN	NaN	NaN	NaN	NaN
ALISERTIB	XBP1	NaN	NaN	NaN	NaN	NaN	NaN	NaN	NaN
ALISERTIB	ZFP36L1	NaN	NaN	NaN	NaN	NaN	NaN	NaN	NaN
ALISERTIB	ZNF292	NaN	NaN	NaN	NaN	NaN	NaN	NaN	NaN
AZ-628	ABCF1	NaN	NaN	NaN	NaN	NaN	NaN	NaN	NaN
AZ-628	ACTG1	NaN	NaN	NaN	NaN	NaN	NaN	NaN	NaN
AZ-628	ARID1A	0.884173	0.157993	-1.16258	0.547925	12.1654	12.1654	8.43805	39.9985
AZ-628	ARID2	NaN	NaN	NaN	NaN	NaN	NaN	NaN	NaN
AZ-628	ATM	NaN	NaN	NaN	NaN	NaN	NaN	NaN	NaN
AZ-628	ATRX	NaN	NaN	NaN	NaN	NaN	NaN	NaN	NaN
AZ-628	BCL7A	NaN	NaN	NaN	NaN	NaN	NaN	NaN	NaN
AZ-628	BHLHE41	NaN	NaN	NaN	NaN	NaN	NaN	NaN	NaN
AZ-628	BRAF	NaN	NaN	NaN	NaN	NaN	NaN	NaN	NaN
AZ-628	BTG1	NaN	NaN	NaN	NaN	NaN	NaN	NaN	NaN
AZ-628	CCND1	NaN	NaN	NaN	NaN	NaN	NaN	NaN	NaN
AZ-628	CDKN1B	NaN	NaN	NaN	NaN	NaN	NaN	NaN	NaN
AZ-628	CDKN2C	NaN	NaN	NaN	NaN	NaN	NaN	NaN	NaN
AZ-628	CREBBP	NaN	NaN	NaN	NaN	NaN	NaN	NaN	NaN
AZ-628	CYLD	NaN	NaN	1.70201	0.986974	NaN	NaN	12.6662	71.0621
AZ-628	DIS3	NaN	NaN	NaN	NaN	NaN	NaN	NaN	NaN
AZ-628	DNMT3A	NaN	NaN	NaN	NaN	NaN	NaN	NaN	NaN
AZ-628	DTX1	NaN	NaN	NaN	NaN	NaN	NaN	NaN	NaN
AZ-628	DUSP2	NaN	NaN	NaN	NaN	NaN	NaN	NaN	NaN
AZ-628	EGR1	NaN	NaN	NaN	NaN	NaN	NaN	NaN	NaN
AZ-628	EP300	NaN	NaN	NaN	NaN	NaN	NaN	NaN	NaN
AZ-628	FGFR3	NaN	NaN	NaN	NaN	NaN	NaN	NaN	NaN
AZ-628	FUBP1	NaN	NaN	NaN	NaN	NaN	NaN	NaN	NaN
AZ-628	HIST1H1B	NaN	NaN	NaN	NaN	NaN	NaN	NaN	NaN
AZ-628	HIST1H1D	NaN	NaN	NaN	NaN	NaN	NaN	NaN	NaN
AZ-628	HIST1H1E	0.760734	0.508674	-1.11606	0.359833	19.5839	38.6592	27.7071	27.7071
AZ-628	HIST1H2BK	NaN	NaN	NaN	NaN	NaN	NaN	NaN	NaN
AZ-628	HUWE1	NaN	NaN	NaN	NaN	NaN	NaN	NaN	NaN
AZ-628	IDH1	NaN	NaN	NaN	NaN	NaN	NaN	NaN	NaN
AZ-628	IDH2	NaN	NaN	NaN	NaN	NaN	NaN	NaN	NaN
AZ-628	IGLL5	NaN	NaN	-0.496509	0.427258	NaN	NaN	8.22471	31.6171
AZ-628	IRF4	NaN	NaN	NaN	NaN	NaN	NaN	NaN	NaN
AZ-628	KDM5C	NaN	NaN	NaN	NaN	NaN	NaN	NaN	NaN
AZ-628	KDM6A	NaN	NaN	NaN	NaN	NaN	NaN	NaN	NaN
AZ-628	KLHL6	NaN	NaN	NaN	NaN	NaN	NaN	NaN	NaN
AZ-628	KMT2B	NaN	NaN	NaN	NaN	NaN	NaN	NaN	NaN
AZ-628	KMT2C	NaN	NaN	NaN	NaN	NaN	NaN	NaN	NaN
AZ-628	KRAS	0.760734	0.508674	-1.11606	0.359833	13.056	38.1505	13.8536	27.3473
AZ-628	LCE1D	NaN	NaN	NaN	NaN	NaN	NaN	NaN	NaN
AZ-628	LTB	NaN	NaN	NaN	NaN	NaN	NaN	NaN	NaN
AZ-628	MAF	NaN	NaN	NaN	NaN	NaN	NaN	NaN	NaN
AZ-628	MAFB	NaN	NaN	NaN	NaN	NaN	NaN	NaN	NaN
AZ-628	MAML2	NaN	NaN	NaN	NaN	NaN	NaN	NaN	NaN
AZ-628	MAN2C1	NaN	NaN	NaN	NaN	NaN	NaN	NaN	NaN
AZ-628	NCOR1	NaN	NaN	NaN	NaN	NaN	NaN	NaN	NaN
AZ-628	NF1	NaN	NaN	NaN	NaN	NaN	NaN	NaN	NaN
AZ-628	NFKB2	NaN	NaN	NaN	NaN	NaN	NaN	NaN	NaN
AZ-628	NFKBIA	NaN	NaN	NaN	NaN	NaN	NaN	NaN	NaN
AZ-628	NRAS	NaN	NaN	NaN	NaN	NaN	NaN	NaN	NaN
AZ-628	PABPC1	NaN	NaN	NaN	NaN	NaN	NaN	NaN	NaN
AZ-628	PIK3CA	NaN	NaN	NaN	NaN	NaN	NaN	NaN	NaN
AZ-628	PIM1	NaN	NaN	NaN	NaN	NaN	NaN	NaN	NaN
AZ-628	POT1	NaN	NaN	NaN	NaN	NaN	NaN	NaN	NaN
AZ-628	PRDM1	NaN	NaN	NaN	NaN	NaN	NaN	NaN	NaN
AZ-628	PRKD2	0.760734	0.508674	-1.11606	0.359833	9.79197	37.6419	9.23572	26.9875
AZ-628	PTPN11	NaN	NaN	NaN	NaN	NaN	NaN	NaN	NaN
AZ-628	RASA2	NaN	NaN	NaN	NaN	NaN	NaN	NaN	NaN
AZ-628	RB1	NaN	NaN	NaN	NaN	NaN	NaN	NaN	NaN
AZ-628	RFTN1	NaN	NaN	NaN	NaN	NaN	NaN	NaN	NaN
AZ-628	RPL10	NaN	NaN	NaN	NaN	NaN	NaN	NaN	NaN
AZ-628	RPL5	NaN	NaN	NaN	NaN	NaN	NaN	NaN	NaN
AZ-628	RPRD1B	NaN	NaN	NaN	NaN	NaN	NaN	NaN	NaN
AZ-628	RPS3A	NaN	NaN	NaN	NaN	NaN	NaN	NaN	NaN
AZ-628	SAMHD1	NaN	NaN	NaN	NaN	NaN	NaN	NaN	NaN
AZ-628	SETD2	NaN	NaN	NaN	NaN	NaN	NaN	NaN	NaN
AZ-628	SF3B1	NaN	NaN	NaN	NaN	NaN	NaN	NaN	NaN
AZ-628	SP140	NaN	NaN	NaN	NaN	NaN	NaN	NaN	NaN
AZ-628	TCL1A	NaN	NaN	NaN	NaN	NaN	NaN	NaN	NaN
AZ-628	TET2	NaN	NaN	NaN	NaN	NaN	NaN	NaN	NaN
AZ-628	TGDS	NaN	NaN	NaN	NaN	NaN	NaN	NaN	NaN
AZ-628	TP53	NaN	NaN	NaN	NaN	NaN	NaN	NaN	NaN
AZ-628	TRAF2	NaN	NaN	NaN	NaN	NaN	NaN	NaN	NaN
AZ-628	TRAF3	NaN	NaN	NaN	NaN	NaN	NaN	NaN	NaN
AZ-628	UBR5	NaN	NaN	NaN	NaN	NaN	NaN	NaN	NaN
AZ-628	XBP1	NaN	NaN	NaN	NaN	NaN	NaN	NaN	NaN
AZ-628	ZFP36L1	NaN	NaN	NaN	NaN	NaN	NaN	NaN	NaN
AZ-628	ZNF292	NaN	NaN	NaN	NaN	NaN	NaN	NaN	NaN
AZD1480	ABCF1	NaN	NaN	NaN	NaN	NaN	NaN	NaN	NaN
AZD1480	ACTG1	NaN	NaN	NaN	NaN	NaN	NaN	NaN	NaN
AZD1480	ARID1A	NaN	NaN	NaN	NaN	NaN	NaN	NaN	NaN
AZD1480	ARID2	NaN	NaN	NaN	NaN	NaN	NaN	NaN	NaN
AZD1480	ATM	NaN	NaN	NaN	NaN	NaN	NaN	NaN	NaN
AZD1480	ATRX	NaN	NaN	NaN	NaN	NaN	NaN	NaN	NaN
AZD1480	BCL7A	NaN	NaN	NaN	NaN	NaN	NaN	NaN	NaN
AZD1480	BHLHE41	NaN	NaN	NaN	NaN	NaN	NaN	NaN	NaN
AZD1480	BRAF	NaN	NaN	1.25735	0.53606	NaN	NaN	8.25533	39.1324
AZD1480	BTG1	NaN	NaN	NaN	NaN	NaN	NaN	NaN	NaN
AZD1480	CCND1	NaN	NaN	NaN	NaN	NaN	NaN	NaN	NaN
AZD1480	CDKN1B	NaN	NaN	NaN	NaN	NaN	NaN	NaN	NaN
AZD1480	CDKN2C	NaN	NaN	NaN	NaN	NaN	NaN	NaN	NaN
AZD1480	CREBBP	NaN	NaN	NaN	NaN	NaN	NaN	NaN	NaN
AZD1480	CYLD	-1.36014	0.694777	0.918214	0.766668	10.6996	50.7188	8.43335	54.4334
AZD1480	DIS3	NaN	NaN	NaN	NaN	NaN	NaN	NaN	NaN
AZD1480	DNMT3A	NaN	NaN	NaN	NaN	NaN	NaN	NaN	NaN
AZD1480	DTX1	NaN	NaN	NaN	NaN	NaN	NaN	NaN	NaN
AZD1480	DUSP2	NaN	NaN	NaN	NaN	NaN	NaN	NaN	NaN
AZD1480	EGR1	NaN	NaN	NaN	NaN	NaN	NaN	NaN	NaN
AZD1480	EP300	NaN	NaN	NaN	NaN	NaN	NaN	NaN	NaN
AZD1480	FGFR3	NaN	NaN	NaN	NaN	NaN	NaN	NaN	NaN
AZD1480	FUBP1	NaN	NaN	NaN	NaN	NaN	NaN	NaN	NaN
AZD1480	HIST1H1B	NaN	NaN	NaN	NaN	NaN	NaN	NaN	NaN
AZD1480	HIST1H1D	NaN	NaN	NaN	NaN	NaN	NaN	NaN	NaN
AZD1480	HIST1H1E	NaN	NaN	NaN	NaN	NaN	NaN	NaN	NaN
AZD1480	HIST1H2BK	NaN	NaN	NaN	NaN	NaN	NaN	NaN	NaN
AZD1480	HUWE1	NaN	NaN	NaN	NaN	NaN	NaN	NaN	NaN
AZD1480	IDH1	NaN	NaN	NaN	NaN	NaN	NaN	NaN	NaN
AZD1480	IDH2	NaN	NaN	NaN	NaN	NaN	NaN	NaN	NaN
AZD1480	IGLL5	2.23745	0.0281107	-1.54491	0.322065	2.16453	2.16453	12.3995	24.4769
AZD1480	IRF4	NaN	NaN	NaN	NaN	NaN	NaN	NaN	NaN
AZD1480	KDM5C	NaN	NaN	NaN	NaN	NaN	NaN	NaN	NaN
AZD1480	KDM6A	NaN	NaN	NaN	NaN	NaN	NaN	NaN	NaN
AZD1480	KLHL6	NaN	NaN	NaN	NaN	NaN	NaN	NaN	NaN
AZD1480	KMT2B	2.23745	0.0281107	-0.0710558	0.725131	1.08226	2.13642	9.30584	52.2094
AZD1480	KMT2C	NaN	NaN	NaN	NaN	NaN	NaN	NaN	NaN
AZD1480	KRAS	NaN	NaN	0.937348	0.971389	NaN	NaN	9.34962	67.9972
AZD1480	LCE1D	NaN	NaN	NaN	NaN	NaN	NaN	NaN	NaN
AZD1480	LTB	NaN	NaN	0.317658	0.995457	NaN	NaN	8.51668	68.6865
AZD1480	MAF	NaN	NaN	NaN	NaN	NaN	NaN	NaN	NaN
AZD1480	MAFB	NaN	NaN	NaN	NaN	NaN	NaN	NaN	NaN
AZD1480	MAML2	NaN	NaN	NaN	NaN	NaN	NaN	NaN	NaN
AZD1480	MAN2C1	NaN	NaN	NaN	NaN	NaN	NaN	NaN	NaN
AZD1480	NCOR1	NaN	NaN	NaN	NaN	NaN	NaN	NaN	NaN
AZD1480	NF1	NaN	NaN	NaN	NaN	NaN	NaN	NaN	NaN
AZD1480	NFKB2	NaN	NaN	NaN	NaN	NaN	NaN	NaN	NaN
AZD1480	NFKBIA	NaN	NaN	NaN	NaN	NaN	NaN	NaN	NaN
AZD1480	NRAS	2.23745	0.0281107	-2.84468	0.367549	0.721509	2.10831	7.07533	27.1987
AZD1480	PABPC1	NaN	NaN	NaN	NaN	NaN	NaN	NaN	NaN
AZD1480	PIK3CA	NaN	NaN	NaN	NaN	NaN	NaN	NaN	NaN
AZD1480	PIM1	NaN	NaN	NaN	NaN	NaN	NaN	NaN	NaN
AZD1480	POT1	NaN	NaN	NaN	NaN	NaN	NaN	NaN	NaN
AZD1480	PRDM1	2.23745	0.0281107	0.791901	0.328081	0.541132	2.08019	8.42075	24.6061
AZD1480	PRKD2	NaN	NaN	NaN	NaN	NaN	NaN	NaN	NaN
AZD1480	PTPN11	NaN	NaN	1.8719	0.0523079	NaN	NaN	4.02771	4.02771
AZD1480	RASA2	NaN	NaN	NaN	NaN	NaN	NaN	NaN	NaN
AZD1480	RB1	NaN	NaN	NaN	NaN	NaN	NaN	NaN	NaN
AZD1480	RFTN1	NaN	NaN	NaN	NaN	NaN	NaN	NaN	NaN
AZD1480	RPL10	NaN	NaN	NaN	NaN	NaN	NaN	NaN	NaN
AZD1480	RPL5	NaN	NaN	NaN	NaN	NaN	NaN	NaN	NaN
AZD1480	RPRD1B	NaN	NaN	NaN	NaN	NaN	NaN	NaN	NaN
AZD1480	RPS3A	NaN	NaN	NaN	NaN	NaN	NaN	NaN	NaN
AZD1480	SAMHD1	NaN	NaN	NaN	NaN	NaN	NaN	NaN	NaN
AZD1480	SETD2	NaN	NaN	NaN	NaN	NaN	NaN	NaN	NaN
AZD1480	SF3B1	NaN	NaN	NaN	NaN	NaN	NaN	NaN	NaN
AZD1480	SP140	NaN	NaN	NaN	NaN	NaN	NaN	NaN	NaN
AZD1480	TCL1A	NaN	NaN	NaN	NaN	NaN	NaN	NaN	NaN
AZD1480	TET2	NaN	NaN	NaN	NaN	NaN	NaN	NaN	NaN
AZD1480	TGDS	NaN	NaN	NaN	NaN	NaN	NaN	NaN	NaN
AZD1480	TP53	NaN	NaN	NaN	NaN	NaN	NaN	NaN	NaN
AZD1480	TRAF2	NaN	NaN	NaN	NaN	NaN	NaN	NaN	NaN
AZD1480	TRAF3	NaN	NaN	NaN	NaN	NaN	NaN	NaN	NaN
AZD1480	UBR5	NaN	NaN	NaN	NaN	NaN	NaN	NaN	NaN
AZD1480	XBP1	NaN	NaN	NaN	NaN	NaN	NaN	NaN	NaN
AZD1480	ZFP36L1	NaN	NaN	NaN	NaN	NaN	NaN	NaN	NaN
AZD1480	ZNF292	NaN	NaN	NaN	NaN	NaN	NaN	NaN	NaN
AZD7762	ABCF1	NaN	NaN	NaN	NaN	NaN	NaN	NaN	NaN
AZD7762	ACTG1	NaN	NaN	NaN	NaN	NaN	NaN	NaN	NaN
AZD7762	ARID1A	NaN	NaN	NaN	NaN	NaN	NaN	NaN	NaN
AZD7762	ARID2	NaN	NaN	NaN	NaN	NaN	NaN	NaN	NaN
AZD7762	ATM	NaN	NaN	NaN	NaN	NaN	NaN	NaN	NaN
AZD7762	ATRX	NaN	NaN	NaN	NaN	NaN	NaN	NaN	NaN
AZD7762	BCL7A	NaN	NaN	NaN	NaN	NaN	NaN	NaN	NaN
AZD7762	BHLHE41	NaN	NaN	NaN	NaN	NaN	NaN	NaN	NaN
AZD7762	BRAF	NaN	NaN	NaN	NaN	NaN	NaN	NaN	NaN
AZD7762	BTG1	NaN	NaN	NaN	NaN	NaN	NaN	NaN	NaN
AZD7762	CCND1	NaN	NaN	NaN	NaN	NaN	NaN	NaN	NaN
AZD7762	CDKN1B	NaN	NaN	NaN	NaN	NaN	NaN	NaN	NaN
AZD7762	CDKN2C	NaN	NaN	NaN	NaN	NaN	NaN	NaN	NaN
AZD7762	CREBBP	NaN	NaN	NaN	NaN	NaN	NaN	NaN	NaN
AZD7762	CYLD	NaN	NaN	NaN	NaN	NaN	NaN	NaN	NaN
AZD7762	DIS3	0.658963	0.376049	-0.612454	0.636031	7.23894	27.8276	12.2436	47.0663
AZD7762	DNMT3A	NaN	NaN	NaN	NaN	NaN	NaN	NaN	NaN
AZD7762	DTX1	NaN	NaN	NaN	NaN	NaN	NaN	NaN	NaN
AZD7762	DUSP2	NaN	NaN	NaN	NaN	NaN	NaN	NaN	NaN
AZD7762	EGR1	NaN	NaN	NaN	NaN	NaN	NaN	NaN	NaN
AZD7762	EP300	-0.296841	0.933546	-1.21916	0.403465	14.3766	68.1489	31.0668	31.0668
AZD7762	FGFR3	NaN	NaN	NaN	NaN	NaN	NaN	NaN	NaN
AZD7762	FUBP1	NaN	NaN	NaN	NaN	NaN	NaN	NaN	NaN
AZD7762	HIST1H1B	NaN	NaN	NaN	NaN	NaN	NaN	NaN	NaN
AZD7762	HIST1H1D	NaN	NaN	NaN	NaN	NaN	NaN	NaN	NaN
AZD7762	HIST1H1E	NaN	NaN	NaN	NaN	NaN	NaN	NaN	NaN
AZD7762	HIST1H2BK	NaN	NaN	NaN	NaN	NaN	NaN	NaN	NaN
AZD7762	HUWE1	NaN	NaN	NaN	NaN	NaN	NaN	NaN	NaN
AZD7762	IDH1	NaN	NaN	NaN	NaN	NaN	NaN	NaN	NaN
AZD7762	IDH2	NaN	NaN	NaN	NaN	NaN	NaN	NaN	NaN
AZD7762	IGLL5	NaN	NaN	NaN	NaN	NaN	NaN	NaN	NaN
AZD7762	IRF4	NaN	NaN	NaN	NaN	NaN	NaN	NaN	NaN
AZD7762	KDM5C	NaN	NaN	NaN	NaN	NaN	NaN	NaN	NaN
AZD7762	KDM6A	NaN	NaN	NaN	NaN	NaN	NaN	NaN	NaN
AZD7762	KLHL6	NaN	NaN	NaN	NaN	NaN	NaN	NaN	NaN
AZD7762	KMT2B	NaN	NaN	NaN	NaN	NaN	NaN	NaN	NaN
AZD7762	KMT2C	NaN	NaN	NaN	NaN	NaN	NaN	NaN	NaN
AZD7762	KRAS	1.87168	0.251967	1.12454	0.766351	9.70073	19.1495	11.8018	55.9437
AZD7762	LCE1D	NaN	NaN	NaN	NaN	NaN	NaN	NaN	NaN
AZD7762	LTB	NaN	NaN	NaN	NaN	NaN	NaN	NaN	NaN
AZD7762	MAF	NaN	NaN	NaN	NaN	NaN	NaN	NaN	NaN
AZD7762	MAFB	NaN	NaN	NaN	NaN	NaN	NaN	NaN	NaN
AZD7762	MAML2	NaN	NaN	NaN	NaN	NaN	NaN	NaN	NaN
AZD7762	MAN2C1	NaN	NaN	NaN	NaN	NaN	NaN	NaN	NaN
AZD7762	NCOR1	NaN	NaN	NaN	NaN	NaN	NaN	NaN	NaN
AZD7762	NF1	-1.87168	0.310813	-1.18925	0.561158	7.97753	23.311	14.4031	42.0869
AZD7762	NFKB2	NaN	NaN	NaN	NaN	NaN	NaN	NaN	NaN
AZD7762	NFKBIA	NaN	NaN	NaN	NaN	NaN	NaN	NaN	NaN
AZD7762	NRAS	NaN	NaN	NaN	NaN	NaN	NaN	NaN	NaN
AZD7762	PABPC1	NaN	NaN	NaN	NaN	NaN	NaN	NaN	NaN
AZD7762	PIK3CA	NaN	NaN	NaN	NaN	NaN	NaN	NaN	NaN
AZD7762	PIM1	NaN	NaN	NaN	NaN	NaN	NaN	NaN	NaN
AZD7762	POT1	NaN	NaN	NaN	NaN	NaN	NaN	NaN	NaN
AZD7762	PRDM1	-3.12175	0.137706	-1.45739	0.53601	10.6034	10.6034	20.6364	40.7368
AZD7762	PRKD2	NaN	NaN	NaN	NaN	NaN	NaN	NaN	NaN
AZD7762	PTPN11	NaN	NaN	NaN	NaN	NaN	NaN	NaN	NaN
AZD7762	RASA2	NaN	NaN	NaN	NaN	NaN	NaN	NaN	NaN
AZD7762	RB1	NaN	NaN	NaN	NaN	NaN	NaN	NaN	NaN
AZD7762	RFTN1	NaN	NaN	NaN	NaN	NaN	NaN	NaN	NaN
AZD7762	RPL10	NaN	NaN	NaN	NaN	NaN	NaN	NaN	NaN
AZD7762	RPL5	NaN	NaN	NaN	NaN	NaN	NaN	NaN	NaN
AZD7762	RPRD1B	NaN	NaN	NaN	NaN	NaN	NaN	NaN	NaN
AZD7762	RPS3A	NaN	NaN	NaN	NaN	NaN	NaN	NaN	NaN
AZD7762	SAMHD1	NaN	NaN	NaN	NaN	NaN	NaN	NaN	NaN
AZD7762	SETD2	NaN	NaN	NaN	NaN	NaN	NaN	NaN	NaN
AZD7762	SF3B1	NaN	NaN	NaN	NaN	NaN	NaN	NaN	NaN
AZD7762	SP140	NaN	NaN	NaN	NaN	NaN	NaN	NaN	NaN
AZD7762	TCL1A	NaN	NaN	NaN	NaN	NaN	NaN	NaN	NaN
AZD7762	TET2	NaN	NaN	NaN	NaN	NaN	NaN	NaN	NaN
AZD7762	TGDS	NaN	NaN	NaN	NaN	NaN	NaN	NaN	NaN
AZD7762	TP53	NaN	NaN	NaN	NaN	NaN	NaN	NaN	NaN
AZD7762	TRAF2	NaN	NaN	NaN	NaN	NaN	NaN	NaN	NaN
AZD7762	TRAF3	NaN	NaN	NaN	NaN	NaN	NaN	NaN	NaN
AZD7762	UBR5	NaN	NaN	NaN	NaN	NaN	NaN	NaN	NaN
AZD7762	XBP1	NaN	NaN	NaN	NaN	NaN	NaN	NaN	NaN
AZD7762	ZFP36L1	NaN	NaN	NaN	NaN	NaN	NaN	NaN	NaN
AZD7762	ZNF292	NaN	NaN	NaN	NaN	NaN	NaN	NaN	NaN
BI2536	ABCF1	NaN	NaN	NaN	NaN	NaN	NaN	NaN	NaN
BI2536	ACTG1	NaN	NaN	NaN	NaN	NaN	NaN	NaN	NaN
BI2536	ARID1A	0.298543	0.92465	-0.4185	0.539133	2.84792	49.0065	2.76755	33.9654
BI2536	ARID2	-0.090455	0.626922	-0.283508	0.791509	2.54068	36.9884	2.64983	43.533
BI2536	ATM	NaN	NaN	NaN	NaN	NaN	NaN	NaN	NaN
BI2536	ATRX	-0.248051	0.35797	-1.05689	0.511415	5.51274	26.1318	3.02915	33.242
BI2536	BCL7A	NaN	NaN	NaN	NaN	NaN	NaN	NaN	NaN
BI2536	BHLHE41	NaN	NaN	NaN	NaN	NaN	NaN	NaN	NaN
BI2536	BRAF	1.30852	0.00844227	1.16683	0.8705	0.650055	0.650055	2.79285	47.007
BI2536	BTG1	NaN	NaN	NaN	NaN	NaN	NaN	NaN	NaN
BI2536	CCND1	NaN	NaN	NaN	NaN	NaN	NaN	NaN	NaN
BI2536	CDKN1B	NaN	NaN	NaN	NaN	NaN	NaN	NaN	NaN
BI2536	CDKN2C	NaN	NaN	NaN	NaN	NaN	NaN	NaN	NaN
BI2536	CREBBP	NaN	NaN	NaN	NaN	NaN	NaN	NaN	NaN
BI2536	CYLD	0.335995	0.47044	1.24371	0.033472	3.01866	31.049	2.57734	2.57734
BI2536	DIS3	-0.360295	0.457767	-0.338882	0.778295	4.406	32.0437	3.15414	45.9194
BI2536	DNMT3A	NaN	NaN	NaN	NaN	NaN	NaN	NaN	NaN
BI2536	DTX1	NaN	NaN	NaN	NaN	NaN	NaN	NaN	NaN
BI2536	DUSP2	-0.111829	0.611399	-4.72718	0.380491	2.94236	37.9067	3.66223	26.6344
BI2536	EGR1	0.119073	0.676771	0.149123	0.7784	2.60557	39.2527	2.85414	44.3688
BI2536	EP300	-0.107528	0.614491	-3.95351	0.392247	2.78328	37.4839	3.35589	27.065
BI2536	FGFR3	-0.360295	0.457767	-0.338882	0.778295	3.91645	31.5859	2.99644	45.1411
BI2536	FUBP1	NaN	NaN	NaN	NaN	NaN	NaN	NaN	NaN
BI2536	HIST1H1B	NaN	NaN	NaN	NaN	NaN	NaN	NaN	NaN
BI2536	HIST1H1D	NaN	NaN	NaN	NaN	NaN	NaN	NaN	NaN
BI2536	HIST1H1E	NaN	NaN	NaN	NaN	NaN	NaN	NaN	NaN
BI2536	HIST1H2BK	NaN	NaN	NaN	NaN	NaN	NaN	NaN	NaN
BI2536	HUWE1	NaN	NaN	NaN	NaN	NaN	NaN	NaN	NaN
BI2536	IDH1	NaN	NaN	NaN	NaN	NaN	NaN	NaN	NaN
BI2536	IDH2	NaN	NaN	NaN	NaN	NaN	NaN	NaN	NaN
BI2536	IGLL5	-0.11119	0.350892	-2.77049	0.335667	6.75467	25.966	3.69234	23.8324
BI2536	IRF4	NaN	NaN	NaN	NaN	NaN	NaN	NaN	NaN
BI2536	KDM5C	NaN	NaN	NaN	NaN	NaN	NaN	NaN	NaN
BI2536	KDM6A	-0.0989665	0.620694	1.77693	0.0557685	2.65519	37.2416	1.43139	4.18264
BI2536	KLHL6	NaN	NaN	NaN	NaN	NaN	NaN	NaN	NaN
BI2536	KMT2B	-0.0989665	0.480357	-2.79541	0.489016	2.84519	31.2232	3.13785	32.2751
BI2536	KMT2C	0.700759	0.143447	-0.283508	0.748227	5.5227	10.902	3.20075	44.8936
BI2536	KRAS	0.287802	0.327083	1.65689	0.0503269	8.39513	24.5312	1.93758	3.82484
BI2536	LCE1D	NaN	NaN	NaN	NaN	NaN	NaN	NaN	NaN
BI2536	LTB	0.233633	0.850961	1.24117	0.55898	2.73017	45.9519	2.69009	34.6567
BI2536	MAF	NaN	NaN	NaN	NaN	NaN	NaN	NaN	NaN
BI2536	MAFB	NaN	NaN	NaN	NaN	NaN	NaN	NaN	NaN
BI2536	MAML2	NaN	NaN	NaN	NaN	NaN	NaN	NaN	NaN
BI2536	MAN2C1	NaN	NaN	NaN	NaN	NaN	NaN	NaN	NaN
BI2536	NCOR1	NaN	NaN	NaN	NaN	NaN	NaN	NaN	NaN
BI2536	NF1	NaN	NaN	NaN	NaN	NaN	NaN	NaN	NaN
BI2536	NFKB2	NaN	NaN	NaN	NaN	NaN	NaN	NaN	NaN
BI2536	NFKBIA	NaN	NaN	NaN	NaN	NaN	NaN	NaN	NaN
BI2536	NRAS	-0.113332	0.467877	-3.7074	0.225122	3.27514	31.3478	3.46687	16.4339
BI2536	PABPC1	NaN	NaN	NaN	NaN	NaN	NaN	NaN	NaN
BI2536	PIK3CA	NaN	NaN	NaN	NaN	NaN	NaN	NaN	NaN
BI2536	PIM1	NaN	NaN	NaN	NaN	NaN	NaN	NaN	NaN
BI2536	POT1	NaN	NaN	NaN	NaN	NaN	NaN	NaN	NaN
BI2536	PRDM1	-0.11482	0.362933	0.833883	0.908886	4.65764	26.1312	2.79937	48.1709
BI2536	PRKD2	NaN	NaN	NaN	NaN	NaN	NaN	NaN	NaN
BI2536	PTPN11	-0.115477	0.465914	0.954083	0.666452	3.58753	31.6821	3.01864	40.6536
BI2536	RASA2	-0.0652177	0.399551	-4.95251	0.127367	4.39506	28.3681	2.45182	9.42518
BI2536	RB1	NaN	NaN	NaN	NaN	NaN	NaN	NaN	NaN
BI2536	RFTN1	NaN	NaN	NaN	NaN	NaN	NaN	NaN	NaN
BI2536	RPL10	NaN	NaN	NaN	NaN	NaN	NaN	NaN	NaN
BI2536	RPL5	NaN	NaN	NaN	NaN	NaN	NaN	NaN	NaN
BI2536	RPRD1B	NaN	NaN	NaN	NaN	NaN	NaN	NaN	NaN
BI2536	RPS3A	NaN	NaN	NaN	NaN	NaN	NaN	NaN	NaN
BI2536	SAMHD1	NaN	NaN	NaN	NaN	NaN	NaN	NaN	NaN
BI2536	SETD2	NaN	NaN	NaN	NaN	NaN	NaN	NaN	NaN
BI2536	SF3B1	NaN	NaN	NaN	NaN	NaN	NaN	NaN	NaN
BI2536	SP140	NaN	NaN	NaN	NaN	NaN	NaN	NaN	NaN
BI2536	TCL1A	NaN	NaN	NaN	NaN	NaN	NaN	NaN	NaN
BI2536	TET2	0.0121576	0.554064	-3.10245	0.247169	3.04735	35.4601	3.172	17.7961
BI2536	TGDS	NaN	NaN	NaN	NaN	NaN	NaN	NaN	NaN
BI2536	TP53	0.00609161	0.594437	-0.252562	0.536714	3.05144	37.4495	2.95192	34.3497
BI2536	TRAF2	NaN	NaN	NaN	NaN	NaN	NaN	NaN	NaN
BI2536	TRAF3	0.120945	0.679091	0.170413	0.790039	2.49	38.7082	2.76514	44.2422
BI2536	UBR5	0.127262	0.752895	-2.23815	0.460521	2.52056	41.4092	3.22365	30.8549
BI2536	XBP1	NaN	NaN	NaN	NaN	NaN	NaN	NaN	NaN
BI2536	ZFP36L1	NaN	NaN	NaN	NaN	NaN	NaN	NaN	NaN
BI2536	ZNF292	0.207145	0.747537	1.19296	0.455948	2.61638	41.8621	3.5108	31.0045
BMS754807	ABCF1	NaN	NaN	NaN	NaN	NaN	NaN	NaN	NaN
BMS754807	ACTG1	NaN	NaN	NaN	NaN	NaN	NaN	NaN	NaN
BMS754807	ARID1A	NaN	NaN	NaN	NaN	NaN	NaN	NaN	NaN
BMS754807	ARID2	NaN	NaN	NaN	NaN	NaN	NaN	NaN	NaN
BMS754807	ATM	NaN	NaN	NaN	NaN	NaN	NaN	NaN	NaN
BMS754807	ATRX	NaN	NaN	NaN	NaN	NaN	NaN	NaN	NaN
BMS754807	BCL7A	NaN	NaN	NaN	NaN	NaN	NaN	NaN	NaN
BMS754807	BHLHE41	NaN	NaN	NaN	NaN	NaN	NaN	NaN	NaN
BMS754807	BRAF	0.511154	0.128288	4.49773	0.0130373	3.29272	9.6216	0.334623	0.977795
BMS754807	BTG1	NaN	NaN	NaN	NaN	NaN	NaN	NaN	NaN
BMS754807	CCND1	NaN	NaN	NaN	NaN	NaN	NaN	NaN	NaN
BMS754807	CDKN1B	NaN	NaN	NaN	NaN	NaN	NaN	NaN	NaN
BMS754807	CDKN2C	NaN	NaN	NaN	NaN	NaN	NaN	NaN	NaN
BMS754807	CREBBP	NaN	NaN	NaN	NaN	NaN	NaN	NaN	NaN
BMS754807	CYLD	0.450194	0.0443265	4.47321	0.700708	3.41314	3.41314	8.99242	50.451
BMS754807	DIS3	NaN	NaN	NaN	NaN	NaN	NaN	NaN	NaN
BMS754807	DNMT3A	NaN	NaN	NaN	NaN	NaN	NaN	NaN	NaN
BMS754807	DTX1	NaN	NaN	NaN	NaN	NaN	NaN	NaN	NaN
BMS754807	DUSP2	NaN	NaN	NaN	NaN	NaN	NaN	NaN	NaN
BMS754807	EGR1	NaN	NaN	NaN	NaN	NaN	NaN	NaN	NaN
BMS754807	EP300	NaN	NaN	NaN	NaN	NaN	NaN	NaN	NaN
BMS754807	FGFR3	NaN	NaN	NaN	NaN	NaN	NaN	NaN	NaN
BMS754807	FUBP1	NaN	NaN	NaN	NaN	NaN	NaN	NaN	NaN
BMS754807	HIST1H1B	NaN	NaN	NaN	NaN	NaN	NaN	NaN	NaN
BMS754807	HIST1H1D	NaN	NaN	NaN	NaN	NaN	NaN	NaN	NaN
BMS754807	HIST1H1E	NaN	NaN	NaN	NaN	NaN	NaN	NaN	NaN
BMS754807	HIST1H2BK	NaN	NaN	NaN	NaN	NaN	NaN	NaN	NaN
BMS754807	HUWE1	NaN	NaN	NaN	NaN	NaN	NaN	NaN	NaN
BMS754807	IDH1	NaN	NaN	NaN	NaN	NaN	NaN	NaN	NaN
BMS754807	IDH2	NaN	NaN	NaN	NaN	NaN	NaN	NaN	NaN
BMS754807	IGLL5	-1.02167	0.205654	1.67543	0.841783	3.16707	15.0127	9.25961	59.7666
BMS754807	IRF4	NaN	NaN	NaN	NaN	NaN	NaN	NaN	NaN
BMS754807	KDM5C	NaN	NaN	NaN	NaN	NaN	NaN	NaN	NaN
BMS754807	KDM6A	NaN	NaN	NaN	NaN	NaN	NaN	NaN	NaN
BMS754807	KLHL6	NaN	NaN	NaN	NaN	NaN	NaN	NaN	NaN
BMS754807	KMT2B	-0.720644	0.317198	1.31559	0.904275	4.0707	22.8382	7.73657	62.395
BMS754807	KMT2C	NaN	NaN	NaN	NaN	NaN	NaN	NaN	NaN
BMS754807	KRAS	0.487049	0.0965655	4.61708	0.00409534	3.71777	7.33897	0.315341	0.315341
BMS754807	LCE1D	NaN	NaN	NaN	NaN	NaN	NaN	NaN	NaN
BMS754807	LTB	-0.06922	0.917359	4.32947	0.00445785	7.84852	63.2978	0.171627	0.338797
BMS754807	MAF	NaN	NaN	NaN	NaN	NaN	NaN	NaN	NaN
BMS754807	MAFB	NaN	NaN	NaN	NaN	NaN	NaN	NaN	NaN
BMS754807	MAML2	NaN	NaN	NaN	NaN	NaN	NaN	NaN	NaN
BMS754807	MAN2C1	NaN	NaN	NaN	NaN	NaN	NaN	NaN	NaN
BMS754807	NCOR1	NaN	NaN	NaN	NaN	NaN	NaN	NaN	NaN
BMS754807	NF1	NaN	NaN	NaN	NaN	NaN	NaN	NaN	NaN
BMS754807	NFKB2	NaN	NaN	NaN	NaN	NaN	NaN	NaN	NaN
BMS754807	NFKBIA	NaN	NaN	NaN	NaN	NaN	NaN	NaN	NaN
BMS754807	NRAS	-0.673182	0.351143	1.29597	0.892194	3.86257	24.9311	8.58737	62.4536
BMS754807	PABPC1	NaN	NaN	NaN	NaN	NaN	NaN	NaN	NaN
BMS754807	PIK3CA	NaN	NaN	NaN	NaN	NaN	NaN	NaN	NaN
BMS754807	PIM1	NaN	NaN	NaN	NaN	NaN	NaN	NaN	NaN
BMS754807	POT1	NaN	NaN	NaN	NaN	NaN	NaN	NaN	NaN
BMS754807	PRDM1	-0.757542	0.133466	-4.47321	0.183725	2.56922	9.87647	3.5367	13.5956
BMS754807	PRKD2	NaN	NaN	NaN	NaN	NaN	NaN	NaN	NaN
BMS754807	PTPN11	-0.392549	0.749129	-1.70292	0.371227	7.21037	52.439	5.7169	27.0996
BMS754807	RASA2	NaN	NaN	NaN	NaN	NaN	NaN	NaN	NaN
BMS754807	RB1	NaN	NaN	NaN	NaN	NaN	NaN	NaN	NaN
BMS754807	RFTN1	NaN	NaN	NaN	NaN	NaN	NaN	NaN	NaN
BMS754807	RPL10	NaN	NaN	NaN	NaN	NaN	NaN	NaN	NaN
BMS754807	RPL5	NaN	NaN	NaN	NaN	NaN	NaN	NaN	NaN
BMS754807	RPRD1B	NaN	NaN	NaN	NaN	NaN	NaN	NaN	NaN
BMS754807	RPS3A	NaN	NaN	NaN	NaN	NaN	NaN	NaN	NaN
BMS754807	SAMHD1	NaN	NaN	NaN	NaN	NaN	NaN	NaN	NaN
BMS754807	SETD2	NaN	NaN	NaN	NaN	NaN	NaN	NaN	NaN
BMS754807	SF3B1	NaN	NaN	NaN	NaN	NaN	NaN	NaN	NaN
BMS754807	SP140	NaN	NaN	NaN	NaN	NaN	NaN	NaN	NaN
BMS754807	TCL1A	NaN	NaN	NaN	NaN	NaN	NaN	NaN	NaN
BMS754807	TET2	NaN	NaN	NaN	NaN	NaN	NaN	NaN	NaN
BMS754807	TGDS	NaN	NaN	NaN	NaN	NaN	NaN	NaN	NaN
BMS754807	TP53	NaN	NaN	NaN	NaN	NaN	NaN	NaN	NaN
BMS754807	TRAF2	NaN	NaN	NaN	NaN	NaN	NaN	NaN	NaN
BMS754807	TRAF3	NaN	NaN	NaN	NaN	NaN	NaN	NaN	NaN
BMS754807	UBR5	NaN	NaN	NaN	NaN	NaN	NaN	NaN	NaN
BMS754807	XBP1	NaN	NaN	NaN	NaN	NaN	NaN	NaN	NaN
BMS754807	ZFP36L1	NaN	NaN	NaN	NaN	NaN	NaN	NaN	NaN
BMS754807	ZNF292	NaN	NaN	NaN	NaN	NaN	NaN	NaN	NaN
BMS777607	ABCF1	NaN	NaN	NaN	NaN	NaN	NaN	NaN	NaN
BMS777607	ACTG1	NaN	NaN	NaN	NaN	NaN	NaN	NaN	NaN
BMS777607	ARID1A	NaN	NaN	NaN	NaN	NaN	NaN	NaN	NaN
BMS777607	ARID2	NaN	NaN	NaN	NaN	NaN	NaN	NaN	NaN
BMS777607	ATM	NaN	NaN	NaN	NaN	NaN	NaN	NaN	NaN
BMS777607	ATRX	NaN	NaN	NaN	NaN	NaN	NaN	NaN	NaN
BMS777607	BCL7A	NaN	NaN	NaN	NaN	NaN	NaN	NaN	NaN
BMS777607	BHLHE41	NaN	NaN	NaN	NaN	NaN	NaN	NaN	NaN
BMS777607	BRAF	NaN	NaN	NaN	NaN	NaN	NaN	NaN	NaN
BMS777607	BTG1	NaN	NaN	NaN	NaN	NaN	NaN	NaN	NaN
BMS777607	CCND1	NaN	NaN	NaN	NaN	NaN	NaN	NaN	NaN
BMS777607	CDKN1B	NaN	NaN	NaN	NaN	NaN	NaN	NaN	NaN
BMS777607	CDKN2C	NaN	NaN	NaN	NaN	NaN	NaN	NaN	NaN
BMS777607	CREBBP	NaN	NaN	NaN	NaN	NaN	NaN	NaN	NaN
BMS777607	CYLD	NaN	NaN	NaN	NaN	NaN	NaN	NaN	NaN
BMS777607	DIS3	NaN	NaN	NaN	NaN	NaN	NaN	NaN	NaN
BMS777607	DNMT3A	NaN	NaN	NaN	NaN	NaN	NaN	NaN	NaN
BMS777607	DTX1	NaN	NaN	NaN	NaN	NaN	NaN	NaN	NaN
BMS777607	DUSP2	NaN	NaN	NaN	NaN	NaN	NaN	NaN	NaN
BMS777607	EGR1	NaN	NaN	NaN	NaN	NaN	NaN	NaN	NaN
BMS777607	EP300	NaN	NaN	NaN	NaN	NaN	NaN	NaN	NaN
BMS777607	FGFR3	NaN	NaN	NaN	NaN	NaN	NaN	NaN	NaN
BMS777607	FUBP1	NaN	NaN	NaN	NaN	NaN	NaN	NaN	NaN
BMS777607	HIST1H1B	NaN	NaN	NaN	NaN	NaN	NaN	NaN	NaN
BMS777607	HIST1H1D	NaN	NaN	NaN	NaN	NaN	NaN	NaN	NaN
BMS777607	HIST1H1E	NaN	NaN	NaN	NaN	NaN	NaN	NaN	NaN
BMS777607	HIST1H2BK	NaN	NaN	NaN	NaN	NaN	NaN	NaN	NaN
BMS777607	HUWE1	NaN	NaN	NaN	NaN	NaN	NaN	NaN	NaN
BMS777607	IDH1	NaN	NaN	NaN	NaN	NaN	NaN	NaN	NaN
BMS777607	IDH2	NaN	NaN	NaN	NaN	NaN	NaN	NaN	NaN
BMS777607	IGLL5	NaN	NaN	NaN	NaN	NaN	NaN	NaN	NaN
BMS777607	IRF4	NaN	NaN	NaN	NaN	NaN	NaN	NaN	NaN
BMS777607	KDM5C	NaN	NaN	NaN	NaN	NaN	NaN	NaN	NaN
BMS777607	KDM6A	NaN	NaN	NaN	NaN	NaN	NaN	NaN	NaN
BMS777607	KLHL6	NaN	NaN	NaN	NaN	NaN	NaN	NaN	NaN
BMS777607	KMT2B	NaN	NaN	NaN	NaN	NaN	NaN	NaN	NaN
BMS777607	KMT2C	NaN	NaN	NaN	NaN	NaN	NaN	NaN	NaN
BMS777607	KRAS	NaN	NaN	NaN	NaN	NaN	NaN	NaN	NaN
BMS777607	LCE1D	NaN	NaN	NaN	NaN	NaN	NaN	NaN	NaN
BMS777607	LTB	NaN	NaN	NaN	NaN	NaN	NaN	NaN	NaN
BMS777607	MAF	NaN	NaN	NaN	NaN	NaN	NaN	NaN	NaN
BMS777607	MAFB	NaN	NaN	NaN	NaN	NaN	NaN	NaN	NaN
BMS777607	MAML2	NaN	NaN	NaN	NaN	NaN	NaN	NaN	NaN
BMS777607	MAN2C1	NaN	NaN	NaN	NaN	NaN	NaN	NaN	NaN
BMS777607	NCOR1	NaN	NaN	NaN	NaN	NaN	NaN	NaN	NaN
BMS777607	NF1	NaN	NaN	NaN	NaN	NaN	NaN	NaN	NaN
BMS777607	NFKB2	NaN	NaN	NaN	NaN	NaN	NaN	NaN	NaN
BMS777607	NFKBIA	NaN	NaN	NaN	NaN	NaN	NaN	NaN	NaN
BMS777607	NRAS	NaN	NaN	NaN	NaN	NaN	NaN	NaN	NaN
BMS777607	PABPC1	NaN	NaN	NaN	NaN	NaN	NaN	NaN	NaN
BMS777607	PIK3CA	NaN	NaN	NaN	NaN	NaN	NaN	NaN	NaN
BMS777607	PIM1	NaN	NaN	NaN	NaN	NaN	NaN	NaN	NaN
BMS777607	POT1	NaN	NaN	NaN	NaN	NaN	NaN	NaN	NaN
BMS777607	PRDM1	NaN	NaN	NaN	NaN	NaN	NaN	NaN	NaN
BMS777607	PRKD2	NaN	NaN	NaN	NaN	NaN	NaN	NaN	NaN
BMS777607	PTPN11	NaN	NaN	NaN	NaN	NaN	NaN	NaN	NaN
BMS777607	RASA2	NaN	NaN	NaN	NaN	NaN	NaN	NaN	NaN
BMS777607	RB1	NaN	NaN	NaN	NaN	NaN	NaN	NaN	NaN
BMS777607	RFTN1	NaN	NaN	NaN	NaN	NaN	NaN	NaN	NaN
BMS777607	RPL10	NaN	NaN	NaN	NaN	NaN	NaN	NaN	NaN
BMS777607	RPL5	NaN	NaN	NaN	NaN	NaN	NaN	NaN	NaN
BMS777607	RPRD1B	NaN	NaN	NaN	NaN	NaN	NaN	NaN	NaN
BMS777607	RPS3A	NaN	NaN	NaN	NaN	NaN	NaN	NaN	NaN
BMS777607	SAMHD1	NaN	NaN	NaN	NaN	NaN	NaN	NaN	NaN
BMS777607	SETD2	NaN	NaN	NaN	NaN	NaN	NaN	NaN	NaN
BMS777607	SF3B1	NaN	NaN	NaN	NaN	NaN	NaN	NaN	NaN
BMS777607	SP140	NaN	NaN	NaN	NaN	NaN	NaN	NaN	NaN
BMS777607	TCL1A	NaN	NaN	NaN	NaN	NaN	NaN	NaN	NaN
BMS777607	TET2	NaN	NaN	NaN	NaN	NaN	NaN	NaN	NaN
BMS777607	TGDS	NaN	NaN	NaN	NaN	NaN	NaN	NaN	NaN
BMS777607	TP53	NaN	NaN	NaN	NaN	NaN	NaN	NaN	NaN
BMS777607	TRAF2	NaN	NaN	NaN	NaN	NaN	NaN	NaN	NaN
BMS777607	TRAF3	NaN	NaN	NaN	NaN	NaN	NaN	NaN	NaN
BMS777607	UBR5	NaN	NaN	NaN	NaN	NaN	NaN	NaN	NaN
BMS777607	XBP1	NaN	NaN	NaN	NaN	NaN	NaN	NaN	NaN
BMS777607	ZFP36L1	NaN	NaN	NaN	NaN	NaN	NaN	NaN	NaN
BMS777607	ZNF292	NaN	NaN	NaN	NaN	NaN	NaN	NaN	NaN
BTZ	ABCF1	-0.255717	0.56528	0.340691	0.991102	1.17639	23.1765	1.13903	10.9021
BTZ	ACTG1	0.00411611	0.0180729	0.490476	0.165152	0.695805	1.37354	1.05972	10.9
BTZ	ARID1A	0.265112	0.853262	0.147528	0.442151	1.13278	17.0652	1.36183	23.434
BTZ	ARID2	-0.29956	0.4977	0.475475	0.931865	1.19759	22.8942	1.13895	13.978
BTZ	ATM	-0.119582	0.853921	-0.304666	0.464924	1.11444	16.2245	1.23445	22.7813
BTZ	ATRX	-0.0887442	0.636735	0.321697	0.264221	1.02143	19.1021	1.13028	15.8532
BTZ	BCL7A	-0.00205952	0.2998	0.106292	0.0042491	1.35792	18.2878	0.327181	0.327181
BTZ	BHLHE41	2.97166	1.92e-05	1.70416	0.0162271	0.00147808	0.00147808	0.416495	1.21703
BTZ	BRAF	-0.147933	0.66942	-0.475219	0.165188	0.991257	17.4049	0.978423	10.7372
BTZ	BTG1	-0.196183	0.460512	-0.225366	0.48688	1.26641	23.0256	1.24966	23.3703
BTZ	CCND1	1.33352	0.0559608	0.500685	0.0867113	0.861797	4.08514	0.953825	6.1565
BTZ	CDKN1B	0.156119	0.669424	-0.547861	0.85265	0.97256	16.7356	1.13197	17.053
BTZ	CDKN2C	NaN	NaN	NaN	NaN	NaN	NaN	NaN	NaN
BTZ	CREBBP	-0.24564	0.330716	0.0290032	0.421235	1.27326	19.1816	1.47432	23.5891
BTZ	CYLD	0.50201	0.236415	0.316551	0.090109	1.6549	15.8398	0.867299	6.30763
BTZ	DIS3	0.03085	0.603249	0.322241	0.58174	1.19103	23.5267	1.21065	23.8513
BTZ	DNMT3A	NaN	NaN	NaN	NaN	NaN	NaN	NaN	NaN
BTZ	DTX1	0.516858	0.654583	-0.0270988	0.714899	1.02863	18.9829	1.12341	20.7321
BTZ	DUSP2	-0.0740006	0.58145	0.156292	0.997252	1.1782	23.258	1.12924	9.97252
BTZ	EGR1	-0.0731429	0.692338	0.124866	0.569169	0.987222	16.6161	1.289	25.0435
BTZ	EP300	0.594631	0.548721	-0.156319	0.965731	1.17365	23.0463	1.12669	11.5888
BTZ	FGFR3	0.185414	0.631161	0.295632	0.787616	1.07999	20.8283	1.12308	18.9028
BTZ	FUBP1	-1.30977	0.299859	-1.52703	0.197118	1.28273	17.9916	1.01187	12.4184
BTZ	HIST1H1B	NaN	NaN	NaN	NaN	NaN	NaN	NaN	NaN
BTZ	HIST1H1D	-0.275313	0.381774	-0.293804	0.450279	1.39984	21.7611	1.33352	23.4145
BTZ	HIST1H1E	-0.0289791	0.911106	0.051268	0.778678	1.11357	13.6666	1.15304	20.2456
BTZ	HIST1H2BK	-0.0481991	0.622431	0.243223	0.941609	1.11459	21.7851	1.13287	13.1825
BTZ	HUWE1	1.30485	0.115237	1.20077	0.102513	1.10916	8.06662	0.87706	7.07343
BTZ	IDH1	0.36234	0.867224	0.746304	0.67445	1.09469	14.7428	1.15406	22.2568
BTZ	IDH2	NaN	NaN	NaN	NaN	NaN	NaN	NaN	NaN
BTZ	IGLL5	-0.197337	0.477667	0.171975	0.194109	1.18646	22.4503	1.0676	12.423
BTZ	IRF4	0.292527	0.419776	0.522162	0.875467	1.46921	23.5074	1.12352	15.7584
BTZ	KDM5C	-0.758992	0.451447	-0.546088	0.454034	1.44839	24.3782	1.29484	23.1558
BTZ	KDM6A	-0.82697	0.143364	-0.93921	0.154865	1.22656	9.89215	1.08406	10.376
BTZ	KLHL6	-0.0165829	0.312882	-0.0963291	0.585576	1.268	18.4601	1.18656	23.4231
BTZ	KMT2B	-0.366354	0.933987	-0.544083	0.761238	1.08965	11.2078	1.14932	20.5534
BTZ	KMT2C	-0.467007	0.257393	-0.244111	0.269374	1.6516	16.9879	1.09167	15.8931
BTZ	KRAS	-0.164523	0.817504	0.124606	0.426411	1.10435	17.1676	1.42755	23.4526
BTZ	LCE1D	NaN	NaN	NaN	NaN	NaN	NaN	NaN	NaN
BTZ	LTB	-0.302699	0.618994	-0.336169	0.244837	1.13482	22.2838	1.10897	14.935
BTZ	MAF	-0.875149	0.0785363	-0.590202	0.464488	0.863899	5.57608	1.27734	23.2244
BTZ	MAFB	0.96102	0.865051	0.751119	0.596147	1.11015	15.5709	1.09294	21.4613
BTZ	MAML2	0.584963	0.933975	0.0793897	0.657022	1.1064	12.1417	1.14979	22.3388
BTZ	MAN2C1	-0.779355	0.658823	-0.195533	0.574818	0.994693	17.7882	1.2646	24.7172
BTZ	NCOR1	1.73489	0.0515559	0.896989	0.0319994	0.992451	3.81514	0.49279	2.33595
BTZ	NF1	0.288569	0.624132	0.234453	0.574912	1.09223	21.2205	1.22967	24.1463
BTZ	NFKB2	-0.380143	0.261782	-0.253952	0.588004	1.55055	17.0158	1.13191	22.3442
BTZ	NFKBIA	1.09454	0.284377	1.7196	0.0221414	1.4598	17.9158	0.426222	1.63846
BTZ	NRAS	-0.143966	0.545063	0.0676473	0.908181	1.19914	23.4377	1.14639	15.4391
BTZ	PABPC1	NaN	NaN	NaN	NaN	NaN	NaN	NaN	NaN
BTZ	PIK3CA	0.588408	0.749892	-1.08694	0.784152	1.0311	16.4976	1.13924	19.6038
BTZ	PIM1	0.289695	0.605121	0.307213	0.739517	1.16486	22.9946	1.13886	20.7065
BTZ	POT1	0.0546004	0.52693	-0.860053	0.134344	1.19334	23.1849	1.03445	9.13538
BTZ	PRDM1	-1.05291	0.143997	-1.058	0.299615	1.10878	9.79182	1.15352	17.3777
BTZ	PRKD2	-0.30889	0.26445	0.051268	0.827787	1.45447	16.9248	1.13821	18.2113
BTZ	PTPN11	0.172233	0.440576	0.442348	0.690773	1.47497	24.2317	1.13169	21.414
BTZ	RASA2	0.268567	0.634898	-0.222593	0.495974	1.04015	19.6818	1.19344	22.8148
BTZ	RB1	0.317764	0.608824	0.547607	0.93014	1.1434	22.5265	1.15517	14.8822
BTZ	RFTN1	-1.3614	0.6571	-0.927636	0.431488	1.01193	18.3988	1.38436	23.3004
BTZ	RPL10	-0.578862	0.935085	-0.594441	0.591595	1.07465	10.2859	1.11105	21.889
BTZ	RPL5	1.74112	0.0644168	1.64533	0.00427022	0.826682	4.63801	0.164403	0.324536
BTZ	RPRD1B	-2.91408	0.451812	-3.01929	0.340275	1.39158	23.946	1.24768	19.3957
BTZ	RPS3A	-0.00205952	0.505903	0.106292	0.620051	1.18044	22.7656	1.11032	21.7018
BTZ	SAMHD1	1.34093	0.45431	0.804965	0.216033	1.34546	23.6241	1.03966	13.3941
BTZ	SETD2	-0.706804	0.297267	-0.1277	0.587559	1.4306	18.4306	1.16005	22.9148
BTZ	SF3B1	0.0821186	0.728317	-0.18982	0.688433	1.01964	16.7513	1.15238	22.0299
BTZ	SP140	0.0225907	0.462459	0.397222	0.813327	1.18698	22.198	1.13866	18.7065
BTZ	TCL1A	NaN	NaN	NaN	NaN	NaN	NaN	NaN	NaN
BTZ	TET2	-0.119582	0.456971	-0.066372	0.843787	1.30321	23.3055	1.13985	17.7195
BTZ	TGDS	0.17267	0.461878	0.0103531	0.486904	1.22637	22.632	1.20941	22.8845
BTZ	TP53	0.10188	0.631634	0.265681	0.700082	1.0573	20.2123	1.12305	21.0025
BTZ	TRAF2	0.442322	0.89265	0.0856261	0.963232	1.10861	14.2824	1.14106	12.522
BTZ	TRAF3	-0.847191	0.0476545	-1.12621	0.0495959	1.22313	3.57409	0.63648	3.5709
BTZ	UBR5	-0.0207586	0.947424	0.130611	0.527481	1.07282	9.47424	1.23079	23.7367
BTZ	XBP1	NaN	NaN	NaN	NaN	NaN	NaN	NaN	NaN
BTZ	ZFP36L1	NaN	NaN	NaN	NaN	NaN	NaN	NaN	NaN
BTZ	ZNF292	0.426941	0.91701	0.125222	0.859675	1.10328	12.8381	1.12195	16.3338
CFZ	ABCF1	-1.30944	0.291066	-0.94649	0.443219	0.862004	15.1355	1.03418	19.9448
CFZ	ACTG1	1.16574	0.981663	1.98506	0.00301694	1.12818	10.7983	0.0774347	0.22627
CFZ	ARID1A	0.437405	0.956155	0.202162	0.729219	1.13268	12.43	1.03981	17.5012
CFZ	ARID2	-1.2195	0.173685	-0.820302	0.435117	0.742987	10.4211	1.1168	20.8856
CFZ	ATM	0.202179	0.0789075	-0.528737	0.407928	1.01265	5.68134	1.1218	20.3964
CFZ	ATRX	0.0993684	0.170896	-0.0923901	0.715873	0.774058	10.4247	1.08083	19.3286
CFZ	BCL7A	-1.32689	0.135125	-1.91627	0.357155	0.800356	8.78313	1.14587	19.2864
CFZ	BHLHE41	0.703717	0.964519	1.3239	0.886222	1.12527	11.5742	1.13732	15.952
CFZ	BRAF	-0.0799553	0.375772	-0.223479	0.0280658	0.851013	16.534	0.270134	1.96461
CFZ	BTG1	-0.93922	0.228283	-1.21977	0.386523	0.925149	13.4687	1.19049	20.4857
CFZ	CCND1	0.945576	0.0435913	-0.201014	0.0815413	0.839133	3.22576	0.627868	5.54481
CFZ	CDKN1B	0.598282	0.0937862	0.0871318	0.971679	0.802393	6.47124	1.15107	12.6318
CFZ	CDKN2C	NaN	NaN	NaN	NaN	NaN	NaN	NaN	NaN
CFZ	CREBBP	0.840016	0.135132	1.16302	0.0155715	0.743226	8.64845	0.199834	1.12115
CFZ	CYLD	0	0.722693	-0.527349	0.89774	0.993703	15.8992	1.13321	15.2616
CFZ	DIS3	-0.184992	0.875489	-0.142845	0.424719	1.10513	14.8833	1.1277	20.8112
CFZ	DNMT3A	NaN	NaN	NaN	NaN	NaN	NaN	NaN	NaN
CFZ	DTX1	0.2935	0.907491	0.203726	0.565591	1.10916	13.6124	1.06221	20.9269
CFZ	DUSP2	-0.318795	0.403709	-0.0227794	0.196449	0.818043	16.1484	1.08047	12.5727
CFZ	EGR1	0.9772	0.797711	0.602615	0.725317	1.07761	16.7519	1.05376	18.1329
CFZ	EP300	-0.314142	0.305269	-0.653548	0.718552	0.810543	14.9582	1.06401	18.6824
CFZ	FGFR3	0.481838	0.0319183	1.12955	0.00896084	1.22885	2.42579	0.137997	0.654141
CFZ	FUBP1	-0.575625	0.441024	-0.910916	0.550662	0.87074	17.1999	1.11581	22.0265
CFZ	HIST1H1B	NaN	NaN	NaN	NaN	NaN	NaN	NaN	NaN
CFZ	HIST1H1D	-1.32689	0.117472	-1.92518	0.300993	0.822307	7.87065	1.21981	17.7586
CFZ	HIST1H1E	0.520832	0.698872	0.531524	0.702008	0.978421	16.0741	1.08109	19.6562
CFZ	HIST1H2BK	-1.32193	0.238396	-1.18133	0.435895	0.917824	13.827	1.08271	20.487
CFZ	HUWE1	1.36159	0.504485	1.97584	0.00198042	0.844463	16.1435	0.0762463	0.150512
CFZ	IDH1	-0.465245	0.464124	-0.89953	0.55174	0.831106	16.2444	1.08933	21.5179
CFZ	IDH2	NaN	NaN	NaN	NaN	NaN	NaN	NaN	NaN
CFZ	IGLL5	-0.42065	0.247051	-0.302769	0.141928	0.827083	13.5878	0.910704	9.36724
CFZ	IRF4	0.0993684	0.244208	-0.889675	0.749343	0.895429	13.9199	1.03035	16.4856
CFZ	KDM5C	-0.31255	0.507059	-0.0398679	0.857944	0.830714	15.7188	1.11969	16.3009
CFZ	KDM6A	-0.72592	0.0932642	-0.360964	0.333524	0.897668	6.52849	1.22292	19.0109
CFZ	KLHL6	-0.241122	0.246477	-0.271173	0.532114	0.862669	13.8027	1.10737	21.8167
CFZ	KMT2B	0.148221	0.488091	-0.294609	0.567787	0.835178	16.107	1.04094	20.4403
CFZ	KMT2C	-0.336252	0.561377	-0.0853578	0.270996	0.847569	15.1572	1.15926	16.2598
CFZ	KRAS	0.0797832	0.558512	0.0161065	0.842667	0.860109	15.6383	1.11871	16.8533
CFZ	LCE1D	NaN	NaN	NaN	NaN	NaN	NaN	NaN	NaN
CFZ	LTB	1.07337	0.0748163	-0.497074	0.0671223	1.15217	5.46159	0.574269	4.63144
CFZ	MAF	1.00751	0.0860112	1.14613	0.02302	0.946124	6.1068	0.253221	1.63442
CFZ	MAFB	NaN	NaN	NaN	NaN	NaN	NaN	NaN	NaN
CFZ	MAML2	1	0.514017	-0.870135	0.620306	0.824569	15.4205	1.06141	20.4701
CFZ	MAN2C1	-0.546914	0.391566	-0.202086	0.592442	0.861445	16.8373	1.03677	20.143
CFZ	NCOR1	-1.30944	0.918578	-0.774639	0.947904	1.10516	12.8601	1.14045	13.2707
CFZ	NF1	-0.155477	0.280814	-0.420558	0.625803	0.864907	14.8831	1.02525	19.3999
CFZ	NFKB2	-0.143664	0.569243	0.559464	0.983466	0.842918	14.8003	1.14738	11.8016
CFZ	NFKBIA	1.69092	0.343199	2.10856	0.333609	0.800799	15.444	1.16763	18.6821
CFZ	NRAS	-0.210851	0.907105	-0.26951	0.557173	1.12657	14.5137	1.07256	21.1726
CFZ	PABPC1	NaN	NaN	NaN	NaN	NaN	NaN	NaN	NaN
CFZ	PIK3CA	0.101709	0.136199	0.544242	0.938827	0.699154	8.58052	1.14746	14.0824
CFZ	PIM1	0.7274	0.847574	1.46182	0.996587	1.10616	16.1039	1.14533	10.9625
CFZ	POT1	0.304735	0.254609	0.294848	0.327181	0.816871	13.7489	1.25965	18.9765
CFZ	PRDM1	-1.56417	0.0392324	-1.54504	0.17633	1.00696	2.94243	1.04441	11.4614
CFZ	PRKD2	0.127127	0.656076	0.792456	0.747123	0.953167	16.4019	1.04597	17.1838
CFZ	PTPN11	0.0347057	0.316114	0.704288	0.227531	0.785187	14.8574	1.09499	14.1069
CFZ	RASA2	0.381023	0.537004	-0.345914	0.568321	0.843864	15.5731	1.01769	19.8912
CFZ	RB1	-0.392631	0.341811	0.144501	0.463187	0.822484	15.7233	1.01901	19.917
CFZ	RFTN1	-1.23668	0.485468	-0.918335	0.443856	0.849569	16.5059	1.0052	19.5297
CFZ	RPL10	-0.537053	0.399906	-0.697371	0.439107	0.832236	16.3961	1.0566	20.1989
CFZ	RPL5	1.04629	0.308065	1.10019	0.48139	0.790701	14.7871	1.02964	20.2184
CFZ	RPRD1B	-1.64386	0.463273	-1.40585	0.643305	0.849334	16.6778	1.03197	19.2991
CFZ	RPS3A	-0.0588937	0.451919	-0.294609	0.621595	0.848727	16.721	1.0405	19.891
CFZ	SAMHD1	-0.392631	0.679308	-0.163508	0.387852	0.968643	16.3034	1.14864	20.1683
CFZ	SETD2	-1.60107	0.10092	-1.08615	0.352831	0.777085	6.86257	1.18122	19.4057
CFZ	SF3B1	-0.449742	0.809605	-0.0166856	0.648109	1.07482	16.1921	1.01846	18.7952
CFZ	SP140	-0.193538	0.291558	0.144501	0.398787	0.83148	14.8695	1.13728	20.3381
CFZ	TCL1A	NaN	NaN	NaN	NaN	NaN	NaN	NaN	NaN
CFZ	TET2	0.496701	0.451473	0.484297	0.0935928	0.869085	17.156	0.65515	6.27072
CFZ	TGDS	0.4748	0.131412	0.481372	0.00728169	0.843228	8.6732	0.140173	0.538845
CFZ	TP53	0.0913018	0.170756	-0.187565	0.237331	0.821764	10.5869	1.07497	14.4772
CFZ	TRAF2	0.667329	0.395753	0.681033	0.907827	0.846471	16.6216	1.12746	14.5252
CFZ	TRAF3	-0.662965	0.296191	-0.947101	0.20495	0.814524	14.8095	1.05208	12.9118
CFZ	UBR5	0.61558	0.858749	-0.14583	0.812992	1.10206	15.4575	1.09825	17.0728
CFZ	XBP1	NaN	NaN	NaN	NaN	NaN	NaN	NaN	NaN
CFZ	ZFP36L1	NaN	NaN	NaN	NaN	NaN	NaN	NaN	NaN
CFZ	ZNF292	1.58119	0.0223213	1.02268	0.000684632	1.71874	1.71874	0.0527167	0.0527167
CGP-60474	ABCF1	NaN	NaN	NaN	NaN	NaN	NaN	NaN	NaN
CGP-60474	ACTG1	NaN	NaN	NaN	NaN	NaN	NaN	NaN	NaN
CGP-60474	ARID1A	-0.174498	0.206356	-0.173219	0.208418	3.97236	15.2704	4.01205	15.4229
CGP-60474	ARID2	NaN	NaN	NaN	NaN	NaN	NaN	NaN	NaN
CGP-60474	ATM	NaN	NaN	NaN	NaN	NaN	NaN	NaN	NaN
CGP-60474	ATRX	NaN	NaN	NaN	NaN	NaN	NaN	NaN	NaN
CGP-60474	BCL7A	NaN	NaN	NaN	NaN	NaN	NaN	NaN	NaN
CGP-60474	BHLHE41	NaN	NaN	NaN	NaN	NaN	NaN	NaN	NaN
CGP-60474	BRAF	NaN	NaN	NaN	NaN	NaN	NaN	NaN	NaN
CGP-60474	BTG1	NaN	NaN	NaN	NaN	NaN	NaN	NaN	NaN
CGP-60474	CCND1	NaN	NaN	NaN	NaN	NaN	NaN	NaN	NaN
CGP-60474	CDKN1B	NaN	NaN	NaN	NaN	NaN	NaN	NaN	NaN
CGP-60474	CDKN2C	NaN	NaN	NaN	NaN	NaN	NaN	NaN	NaN
CGP-60474	CREBBP	NaN	NaN	NaN	NaN	NaN	NaN	NaN	NaN
CGP-60474	CYLD	-0.0917303	0.473491	-0.0916953	0.472019	7.29176	34.5649	7.26909	34.4574
CGP-60474	DIS3	NaN	NaN	NaN	NaN	NaN	NaN	NaN	NaN
CGP-60474	DNMT3A	NaN	NaN	NaN	NaN	NaN	NaN	NaN	NaN
CGP-60474	DTX1	NaN	NaN	NaN	NaN	NaN	NaN	NaN	NaN
CGP-60474	DUSP2	NaN	NaN	NaN	NaN	NaN	NaN	NaN	NaN
CGP-60474	EGR1	NaN	NaN	NaN	NaN	NaN	NaN	NaN	NaN
CGP-60474	EP300	NaN	NaN	NaN	NaN	NaN	NaN	NaN	NaN
CGP-60474	FGFR3	NaN	NaN	NaN	NaN	NaN	NaN	NaN	NaN
CGP-60474	FUBP1	NaN	NaN	NaN	NaN	NaN	NaN	NaN	NaN
CGP-60474	HIST1H1B	NaN	NaN	NaN	NaN	NaN	NaN	NaN	NaN
CGP-60474	HIST1H1D	NaN	NaN	NaN	NaN	NaN	NaN	NaN	NaN
CGP-60474	HIST1H1E	-0.164063	0.180083	-0.164418	0.179536	13.8664	13.8664	13.8242	13.8242
CGP-60474	HIST1H2BK	NaN	NaN	NaN	NaN	NaN	NaN	NaN	NaN
CGP-60474	HUWE1	NaN	NaN	NaN	NaN	NaN	NaN	NaN	NaN
CGP-60474	IDH1	NaN	NaN	NaN	NaN	NaN	NaN	NaN	NaN
CGP-60474	IDH2	NaN	NaN	NaN	NaN	NaN	NaN	NaN	NaN
CGP-60474	IGLL5	0.0460011	0.788438	0.0469945	0.788133	10.1183	56.7676	10.1144	56.7456
CGP-60474	IRF4	NaN	NaN	NaN	NaN	NaN	NaN	NaN	NaN
CGP-60474	KDM5C	NaN	NaN	NaN	NaN	NaN	NaN	NaN	NaN
CGP-60474	KDM6A	NaN	NaN	NaN	NaN	NaN	NaN	NaN	NaN
CGP-60474	KLHL6	NaN	NaN	NaN	NaN	NaN	NaN	NaN	NaN
CGP-60474	KMT2B	NaN	NaN	NaN	NaN	NaN	NaN	NaN	NaN
CGP-60474	KMT2C	NaN	NaN	NaN	NaN	NaN	NaN	NaN	NaN
CGP-60474	KRAS	-0.164063	0.180083	-0.164418	0.179536	6.9332	13.6863	6.91212	13.6447
CGP-60474	LCE1D	NaN	NaN	NaN	NaN	NaN	NaN	NaN	NaN
CGP-60474	LTB	NaN	NaN	NaN	NaN	NaN	NaN	NaN	NaN
CGP-60474	MAF	NaN	NaN	NaN	NaN	NaN	NaN	NaN	NaN
CGP-60474	MAFB	NaN	NaN	NaN	NaN	NaN	NaN	NaN	NaN
CGP-60474	MAML2	NaN	NaN	NaN	NaN	NaN	NaN	NaN	NaN
CGP-60474	MAN2C1	NaN	NaN	NaN	NaN	NaN	NaN	NaN	NaN
CGP-60474	NCOR1	NaN	NaN	NaN	NaN	NaN	NaN	NaN	NaN
CGP-60474	NF1	NaN	NaN	NaN	NaN	NaN	NaN	NaN	NaN
CGP-60474	NFKB2	NaN	NaN	NaN	NaN	NaN	NaN	NaN	NaN
CGP-60474	NFKBIA	NaN	NaN	NaN	NaN	NaN	NaN	NaN	NaN
CGP-60474	NRAS	NaN	NaN	NaN	NaN	NaN	NaN	NaN	NaN
CGP-60474	PABPC1	NaN	NaN	NaN	NaN	NaN	NaN	NaN	NaN
CGP-60474	PIK3CA	NaN	NaN	NaN	NaN	NaN	NaN	NaN	NaN
CGP-60474	PIM1	NaN	NaN	NaN	NaN	NaN	NaN	NaN	NaN
CGP-60474	POT1	NaN	NaN	NaN	NaN	NaN	NaN	NaN	NaN
CGP-60474	PRDM1	NaN	NaN	NaN	NaN	NaN	NaN	NaN	NaN
CGP-60474	PRKD2	-0.164063	0.180083	-0.164418	0.179536	4.62213	13.5062	4.60808	13.4652
CGP-60474	PTPN11	NaN	NaN	NaN	NaN	NaN	NaN	NaN	NaN
CGP-60474	RASA2	NaN	NaN	NaN	NaN	NaN	NaN	NaN	NaN
CGP-60474	RB1	NaN	NaN	NaN	NaN	NaN	NaN	NaN	NaN
CGP-60474	RFTN1	NaN	NaN	NaN	NaN	NaN	NaN	NaN	NaN
CGP-60474	RPL10	NaN	NaN	NaN	NaN	NaN	NaN	NaN	NaN
CGP-60474	RPL5	NaN	NaN	NaN	NaN	NaN	NaN	NaN	NaN
CGP-60474	RPRD1B	NaN	NaN	NaN	NaN	NaN	NaN	NaN	NaN
CGP-60474	RPS3A	NaN	NaN	NaN	NaN	NaN	NaN	NaN	NaN
CGP-60474	SAMHD1	NaN	NaN	NaN	NaN	NaN	NaN	NaN	NaN
CGP-60474	SETD2	NaN	NaN	NaN	NaN	NaN	NaN	NaN	NaN
CGP-60474	SF3B1	NaN	NaN	NaN	NaN	NaN	NaN	NaN	NaN
CGP-60474	SP140	NaN	NaN	NaN	NaN	NaN	NaN	NaN	NaN
CGP-60474	TCL1A	NaN	NaN	NaN	NaN	NaN	NaN	NaN	NaN
CGP-60474	TET2	NaN	NaN	NaN	NaN	NaN	NaN	NaN	NaN
CGP-60474	TGDS	NaN	NaN	NaN	NaN	NaN	NaN	NaN	NaN
CGP-60474	TP53	NaN	NaN	NaN	NaN	NaN	NaN	NaN	NaN
CGP-60474	TRAF2	NaN	NaN	NaN	NaN	NaN	NaN	NaN	NaN
CGP-60474	TRAF3	NaN	NaN	NaN	NaN	NaN	NaN	NaN	NaN
CGP-60474	UBR5	NaN	NaN	NaN	NaN	NaN	NaN	NaN	NaN
CGP-60474	XBP1	NaN	NaN	NaN	NaN	NaN	NaN	NaN	NaN
CGP-60474	ZFP36L1	NaN	NaN	NaN	NaN	NaN	NaN	NaN	NaN
CGP-60474	ZNF292	NaN	NaN	NaN	NaN	NaN	NaN	NaN	NaN
CPD22	ABCF1	NaN	NaN	NaN	NaN	NaN	NaN	NaN	NaN
CPD22	ACTG1	NaN	NaN	NaN	NaN	NaN	NaN	NaN	NaN
CPD22	ARID1A	-0.597163	0.092873	-0.584853	0.0521559	1.78781	6.8726	1.004	3.85954
CPD22	ARID2	NaN	NaN	NaN	NaN	NaN	NaN	NaN	NaN
CPD22	ATM	NaN	NaN	NaN	NaN	NaN	NaN	NaN	NaN
CPD22	ATRX	NaN	NaN	NaN	NaN	NaN	NaN	NaN	NaN
CPD22	BCL7A	NaN	NaN	NaN	NaN	NaN	NaN	NaN	NaN
CPD22	BHLHE41	NaN	NaN	NaN	NaN	NaN	NaN	NaN	NaN
CPD22	BRAF	0.0870986	0.97148	0.293223	0.732635	2.99216	51.4884	2.68633	41.7602
CPD22	BTG1	NaN	NaN	NaN	NaN	NaN	NaN	NaN	NaN
CPD22	CCND1	NaN	NaN	NaN	NaN	NaN	NaN	NaN	NaN
CPD22	CDKN1B	NaN	NaN	NaN	NaN	NaN	NaN	NaN	NaN
CPD22	CDKN2C	NaN	NaN	NaN	NaN	NaN	NaN	NaN	NaN
CPD22	CREBBP	NaN	NaN	NaN	NaN	NaN	NaN	NaN	NaN
CPD22	CYLD	0.174733	0.965255	0.333855	0.671369	3.09686	52.1237	2.87197	40.2822
CPD22	DIS3	-0.188229	0.449594	-0.0516589	0.571808	2.88489	29.6732	2.93528	36.0239
CPD22	DNMT3A	NaN	NaN	NaN	NaN	NaN	NaN	NaN	NaN
CPD22	DTX1	NaN	NaN	NaN	NaN	NaN	NaN	NaN	NaN
CPD22	DUSP2	-0.230654	0.563233	-0.558678	0.294192	3.09778	36.0469	3.77547	21.1818
CPD22	EGR1	NaN	NaN	NaN	NaN	NaN	NaN	NaN	NaN
CPD22	EP300	0.0611403	0.85847	-0.222789	0.533397	3.47906	50.6497	3.15935	34.6708
CPD22	FGFR3	0.0186157	0.806633	0.177759	0.979522	3.4506	48.398	3.01693	51.9147
CPD22	FUBP1	NaN	NaN	NaN	NaN	NaN	NaN	NaN	NaN
CPD22	HIST1H1B	NaN	NaN	NaN	NaN	NaN	NaN	NaN	NaN
CPD22	HIST1H1D	0.203533	0.953115	0.566084	0.432307	3.3359	53.3744	3.69863	29.8292
CPD22	HIST1H1E	-0.584963	0.376037	-0.503145	0.525758	2.89549	25.5705	3.37361	34.7
CPD22	HIST1H2BK	NaN	NaN	NaN	NaN	NaN	NaN	NaN	NaN
CPD22	HUWE1	NaN	NaN	NaN	NaN	NaN	NaN	NaN	NaN
CPD22	IDH1	NaN	NaN	NaN	NaN	NaN	NaN	NaN	NaN
CPD22	IDH2	NaN	NaN	NaN	NaN	NaN	NaN	NaN	NaN
CPD22	IGLL5	0.475664	0.379327	0.351028	0.634828	2.65529	25.4149	3.05511	39.3593
CPD22	IRF4	NaN	NaN	NaN	NaN	NaN	NaN	NaN	NaN
CPD22	KDM5C	NaN	NaN	NaN	NaN	NaN	NaN	NaN	NaN
CPD22	KDM6A	NaN	NaN	NaN	NaN	NaN	NaN	NaN	NaN
CPD22	KLHL6	NaN	NaN	NaN	NaN	NaN	NaN	NaN	NaN
CPD22	KMT2B	0.153876	0.157609	0.010494	0.787702	1.7337	11.1903	2.63709	43.3236
CPD22	KMT2C	0.548813	0.0398779	0.327466	0.441945	3.0706	3.0706	3.40298	30.0523
CPD22	KRAS	-0.323377	0.0519814	-0.563932	0.0380993	2.00128	3.95059	1.46682	2.89554
CPD22	LCE1D	NaN	NaN	NaN	NaN	NaN	NaN	NaN	NaN
CPD22	LTB	0.1981	0.960671	0.336949	0.779958	3.21616	52.8369	2.72985	43.6776
CPD22	MAF	NaN	NaN	NaN	NaN	NaN	NaN	NaN	NaN
CPD22	MAFB	NaN	NaN	NaN	NaN	NaN	NaN	NaN	NaN
CPD22	MAML2	NaN	NaN	NaN	NaN	NaN	NaN	NaN	NaN
CPD22	MAN2C1	NaN	NaN	NaN	NaN	NaN	NaN	NaN	NaN
CPD22	NCOR1	NaN	NaN	NaN	NaN	NaN	NaN	NaN	NaN
CPD22	NF1	0.0525799	0.761299	-0.00764604	0.642008	3.44824	46.4393	2.90792	39.1625
CPD22	NFKB2	NaN	NaN	NaN	NaN	NaN	NaN	NaN	NaN
CPD22	NFKBIA	NaN	NaN	NaN	NaN	NaN	NaN	NaN	NaN
CPD22	NRAS	0.169237	0.941413	0.24866	0.718675	3.45185	53.6606	2.7669	41.6831
CPD22	PABPC1	NaN	NaN	NaN	NaN	NaN	NaN	NaN	NaN
CPD22	PIK3CA	NaN	NaN	NaN	NaN	NaN	NaN	NaN	NaN
CPD22	PIM1	NaN	NaN	NaN	NaN	NaN	NaN	NaN	NaN
CPD22	POT1	0.00931776	0.64136	-0.00582976	0.535715	3.08655	39.7643	2.94644	34.2858
CPD22	PRDM1	NaN	NaN	NaN	NaN	NaN	NaN	NaN	NaN
CPD22	PRKD2	-0.615659	0.061672	-0.613537	0.0430663	1.58291	4.6254	1.10537	3.22997
CPD22	PTPN11	NaN	NaN	NaN	NaN	NaN	NaN	NaN	NaN
CPD22	RASA2	-0.335897	0.476406	-0.371227	0.41076	2.82179	30.9664	3.95356	28.7532
CPD22	RB1	0.216079	0.102359	0.327466	0.687308	1.57633	7.47224	2.78541	40.5512
CPD22	RFTN1	NaN	NaN	NaN	NaN	NaN	NaN	NaN	NaN
CPD22	RPL10	NaN	NaN	NaN	NaN	NaN	NaN	NaN	NaN
CPD22	RPL5	0.649541	0.143566	0.600744	0.194903	1.84243	10.3367	3.0015	14.2279
CPD22	RPRD1B	NaN	NaN	NaN	NaN	NaN	NaN	NaN	NaN
CPD22	RPS3A	NaN	NaN	NaN	NaN	NaN	NaN	NaN	NaN
CPD22	SAMHD1	NaN	NaN	NaN	NaN	NaN	NaN	NaN	NaN
CPD22	SETD2	NaN	NaN	NaN	NaN	NaN	NaN	NaN	NaN
CPD22	SF3B1	NaN	NaN	NaN	NaN	NaN	NaN	NaN	NaN
CPD22	SP140	0.810029	0.162201	1.03247	0.0305674	1.56118	11.3541	2.35369	2.35369
CPD22	TCL1A	NaN	NaN	NaN	NaN	NaN	NaN	NaN	NaN
CPD22	TET2	0.379965	0.602306	0.465283	0.44787	3.09184	37.9453	3.13509	30.0073
CPD22	TGDS	NaN	NaN	NaN	NaN	NaN	NaN	NaN	NaN
CPD22	TP53	-0.233572	0.312736	-0.229649	0.403941	2.67563	21.5788	4.44335	28.6798
CPD22	TRAF2	NaN	NaN	NaN	NaN	NaN	NaN	NaN	NaN
CPD22	TRAF3	0.1981	0.892247	0.36463	0.816769	3.43515	51.7503	2.62047	44.1055
CPD22	UBR5	NaN	NaN	NaN	NaN	NaN	NaN	NaN	NaN
CPD22	XBP1	NaN	NaN	NaN	NaN	NaN	NaN	NaN	NaN
CPD22	ZFP36L1	NaN	NaN	NaN	NaN	NaN	NaN	NaN	NaN
CPD22	ZNF292	NaN	NaN	NaN	NaN	NaN	NaN	NaN	NaN
CRIZOTINIB	ABCF1	NaN	NaN	NaN	NaN	NaN	NaN	NaN	NaN
CRIZOTINIB	ACTG1	NaN	NaN	NaN	NaN	NaN	NaN	NaN	NaN
CRIZOTINIB	ARID1A	NaN	NaN	NaN	NaN	NaN	NaN	NaN	NaN
CRIZOTINIB	ARID2	0.611621	0.407127	0.561075	0.42913	6.26975	29.7202	3.3043	29.1808
CRIZOTINIB	ATM	NaN	NaN	NaN	NaN	NaN	NaN	NaN	NaN
CRIZOTINIB	ATRX	NaN	NaN	NaN	NaN	NaN	NaN	NaN	NaN
CRIZOTINIB	BCL7A	NaN	NaN	NaN	NaN	NaN	NaN	NaN	NaN
CRIZOTINIB	BHLHE41	NaN	NaN	NaN	NaN	NaN	NaN	NaN	NaN
CRIZOTINIB	BRAF	-0.0797272	0.673738	0.617125	0.555179	3.9906	43.7929	3.88625	37.197
CRIZOTINIB	BTG1	NaN	NaN	NaN	NaN	NaN	NaN	NaN	NaN
CRIZOTINIB	CCND1	NaN	NaN	NaN	NaN	NaN	NaN	NaN	NaN
CRIZOTINIB	CDKN1B	NaN	NaN	NaN	NaN	NaN	NaN	NaN	NaN
CRIZOTINIB	CDKN2C	NaN	NaN	NaN	NaN	NaN	NaN	NaN	NaN
CRIZOTINIB	CREBBP	NaN	NaN	NaN	NaN	NaN	NaN	NaN	NaN
CRIZOTINIB	CYLD	0.224456	0.774788	0.715751	0.189266	3.72867	48.0369	3.64338	14.0057
CRIZOTINIB	DIS3	NaN	NaN	NaN	NaN	NaN	NaN	NaN	NaN
CRIZOTINIB	DNMT3A	NaN	NaN	NaN	NaN	NaN	NaN	NaN	NaN
CRIZOTINIB	DTX1	NaN	NaN	NaN	NaN	NaN	NaN	NaN	NaN
CRIZOTINIB	DUSP2	NaN	NaN	NaN	NaN	NaN	NaN	NaN	NaN
CRIZOTINIB	EGR1	NaN	NaN	NaN	NaN	NaN	NaN	NaN	NaN
CRIZOTINIB	EP300	0.0923754	0.88474	0.432529	0.565647	3.78472	53.0844	3.62957	37.3327
CRIZOTINIB	FGFR3	NaN	NaN	NaN	NaN	NaN	NaN	NaN	NaN
CRIZOTINIB	FUBP1	NaN	NaN	NaN	NaN	NaN	NaN	NaN	NaN
CRIZOTINIB	HIST1H1B	NaN	NaN	NaN	NaN	NaN	NaN	NaN	NaN
CRIZOTINIB	HIST1H1D	NaN	NaN	NaN	NaN	NaN	NaN	NaN	NaN
CRIZOTINIB	HIST1H1E	NaN	NaN	NaN	NaN	NaN	NaN	NaN	NaN
CRIZOTINIB	HIST1H2BK	NaN	NaN	NaN	NaN	NaN	NaN	NaN	NaN
CRIZOTINIB	HUWE1	NaN	NaN	NaN	NaN	NaN	NaN	NaN	NaN
CRIZOTINIB	IDH1	NaN	NaN	NaN	NaN	NaN	NaN	NaN	NaN
CRIZOTINIB	IDH2	NaN	NaN	NaN	NaN	NaN	NaN	NaN	NaN
CRIZOTINIB	IGLL5	-0.0292054	0.442298	0.0863468	0.952189	5.67616	31.8454	3.85887	56.1791
CRIZOTINIB	IRF4	NaN	NaN	NaN	NaN	NaN	NaN	NaN	NaN
CRIZOTINIB	KDM5C	NaN	NaN	NaN	NaN	NaN	NaN	NaN	NaN
CRIZOTINIB	KDM6A	0.00720989	0.726479	-0.242123	0.776815	3.72926	45.7682	4.27248	49.7162
CRIZOTINIB	KLHL6	NaN	NaN	NaN	NaN	NaN	NaN	NaN	NaN
CRIZOTINIB	KMT2B	-0.0797272	0.930105	-0.286614	0.840759	3.76937	54.8762	4.04615	52.1271
CRIZOTINIB	KMT2C	0.106076	0.87061	0.210118	0.594375	3.94335	53.1072	3.52053	38.6344
CRIZOTINIB	KRAS	0.491237	0.164953	0.857294	0.0743018	6.3507	12.5364	5.72124	5.72124
CRIZOTINIB	LCE1D	NaN	NaN	NaN	NaN	NaN	NaN	NaN	NaN
CRIZOTINIB	LTB	-0.172042	0.657	-1.80461	0.230661	4.21575	43.362	2.96015	16.6076
CRIZOTINIB	MAF	NaN	NaN	NaN	NaN	NaN	NaN	NaN	NaN
CRIZOTINIB	MAFB	NaN	NaN	NaN	NaN	NaN	NaN	NaN	NaN
CRIZOTINIB	MAML2	NaN	NaN	NaN	NaN	NaN	NaN	NaN	NaN
CRIZOTINIB	MAN2C1	NaN	NaN	NaN	NaN	NaN	NaN	NaN	NaN
CRIZOTINIB	NCOR1	NaN	NaN	NaN	NaN	NaN	NaN	NaN	NaN
CRIZOTINIB	NF1	NaN	NaN	NaN	NaN	NaN	NaN	NaN	NaN
CRIZOTINIB	NFKB2	NaN	NaN	NaN	NaN	NaN	NaN	NaN	NaN
CRIZOTINIB	NFKBIA	NaN	NaN	NaN	NaN	NaN	NaN	NaN	NaN
CRIZOTINIB	NRAS	-0.760186	0.267837	-0.286614	0.848788	6.87448	20.0878	3.84451	51.7761
CRIZOTINIB	PABPC1	NaN	NaN	NaN	NaN	NaN	NaN	NaN	NaN
CRIZOTINIB	PIK3CA	NaN	NaN	NaN	NaN	NaN	NaN	NaN	NaN
CRIZOTINIB	PIM1	NaN	NaN	NaN	NaN	NaN	NaN	NaN	NaN
CRIZOTINIB	POT1	NaN	NaN	NaN	NaN	NaN	NaN	NaN	NaN
CRIZOTINIB	PRDM1	0.258625	0.585196	0.311087	0.294089	5.00668	40.3785	3.23498	20.8803
CRIZOTINIB	PRKD2	NaN	NaN	NaN	NaN	NaN	NaN	NaN	NaN
CRIZOTINIB	PTPN11	0.708671	0.138406	0.737897	0.159272	10.6573	10.6573	6.13197	12.1047
CRIZOTINIB	RASA2	0.435848	0.466933	-0.809794	0.36625	5.13626	33.1522	3.52515	25.6375
CRIZOTINIB	RB1	NaN	NaN	NaN	NaN	NaN	NaN	NaN	NaN
CRIZOTINIB	RFTN1	NaN	NaN	NaN	NaN	NaN	NaN	NaN	NaN
CRIZOTINIB	RPL10	NaN	NaN	NaN	NaN	NaN	NaN	NaN	NaN
CRIZOTINIB	RPL5	NaN	NaN	NaN	NaN	NaN	NaN	NaN	NaN
CRIZOTINIB	RPRD1B	NaN	NaN	NaN	NaN	NaN	NaN	NaN	NaN
CRIZOTINIB	RPS3A	NaN	NaN	NaN	NaN	NaN	NaN	NaN	NaN
CRIZOTINIB	SAMHD1	NaN	NaN	NaN	NaN	NaN	NaN	NaN	NaN
CRIZOTINIB	SETD2	NaN	NaN	NaN	NaN	NaN	NaN	NaN	NaN
CRIZOTINIB	SF3B1	NaN	NaN	NaN	NaN	NaN	NaN	NaN	NaN
CRIZOTINIB	SP140	NaN	NaN	NaN	NaN	NaN	NaN	NaN	NaN
CRIZOTINIB	TCL1A	NaN	NaN	NaN	NaN	NaN	NaN	NaN	NaN
CRIZOTINIB	TET2	-0.0680782	0.611105	-0.198556	0.828853	4.27774	40.944	4.25478	52.2178
CRIZOTINIB	TGDS	NaN	NaN	NaN	NaN	NaN	NaN	NaN	NaN
CRIZOTINIB	TP53	-0.672161	0.306142	-2.25043	0.177408	5.89324	22.6545	4.55347	13.3056
CRIZOTINIB	TRAF2	NaN	NaN	NaN	NaN	NaN	NaN	NaN	NaN
CRIZOTINIB	TRAF3	-0.0711123	0.606736	-0.019593	0.934641	4.67186	41.258	3.99819	56.0785
CRIZOTINIB	UBR5	-0.257123	0.578305	-1.14565	0.379496	5.56618	40.4813	3.2468	26.1852
CRIZOTINIB	XBP1	NaN	NaN	NaN	NaN	NaN	NaN	NaN	NaN
CRIZOTINIB	ZFP36L1	NaN	NaN	NaN	NaN	NaN	NaN	NaN	NaN
CRIZOTINIB	ZNF292	-0.0923754	0.680385	0.692934	0.200346	3.74212	43.5446	3.08533	14.6253
DABRAFENIB	ABCF1	NaN	NaN	NaN	NaN	NaN	NaN	NaN	NaN
DABRAFENIB	ACTG1	NaN	NaN	NaN	NaN	NaN	NaN	NaN	NaN
DABRAFENIB	ARID1A	NaN	NaN	NaN	NaN	NaN	NaN	NaN	NaN
DABRAFENIB	ARID2	NaN	NaN	NaN	NaN	NaN	NaN	NaN	NaN
DABRAFENIB	ATM	NaN	NaN	NaN	NaN	NaN	NaN	NaN	NaN
DABRAFENIB	ATRX	NaN	NaN	NaN	NaN	NaN	NaN	NaN	NaN
DABRAFENIB	BCL7A	NaN	NaN	NaN	NaN	NaN	NaN	NaN	NaN
DABRAFENIB	BHLHE41	NaN	NaN	NaN	NaN	NaN	NaN	NaN	NaN
DABRAFENIB	BRAF	NaN	NaN	-0.69166	0.792423	NaN	NaN	20.3389	59.4317
DABRAFENIB	BTG1	NaN	NaN	NaN	NaN	NaN	NaN	NaN	NaN
DABRAFENIB	CCND1	NaN	NaN	NaN	NaN	NaN	NaN	NaN	NaN
DABRAFENIB	CDKN1B	NaN	NaN	NaN	NaN	NaN	NaN	NaN	NaN
DABRAFENIB	CDKN2C	NaN	NaN	NaN	NaN	NaN	NaN	NaN	NaN
DABRAFENIB	CREBBP	NaN	NaN	NaN	NaN	NaN	NaN	NaN	NaN
DABRAFENIB	CYLD	NaN	NaN	1.76842	0.125757	NaN	NaN	9.68326	9.68326
DABRAFENIB	DIS3	NaN	NaN	-0.69166	0.792423	NaN	NaN	15.2541	58.6393
DABRAFENIB	DNMT3A	NaN	NaN	NaN	NaN	NaN	NaN	NaN	NaN
DABRAFENIB	DTX1	NaN	NaN	NaN	NaN	NaN	NaN	NaN	NaN
DABRAFENIB	DUSP2	NaN	NaN	NaN	NaN	NaN	NaN	NaN	NaN
DABRAFENIB	EGR1	NaN	NaN	NaN	NaN	NaN	NaN	NaN	NaN
DABRAFENIB	EP300	NaN	NaN	NaN	NaN	NaN	NaN	NaN	NaN
DABRAFENIB	FGFR3	NaN	NaN	NaN	NaN	NaN	NaN	NaN	NaN
DABRAFENIB	FUBP1	NaN	NaN	NaN	NaN	NaN	NaN	NaN	NaN
DABRAFENIB	HIST1H1B	NaN	NaN	NaN	NaN	NaN	NaN	NaN	NaN
DABRAFENIB	HIST1H1D	NaN	NaN	NaN	NaN	NaN	NaN	NaN	NaN
DABRAFENIB	HIST1H1E	NaN	NaN	NaN	NaN	NaN	NaN	NaN	NaN
DABRAFENIB	HIST1H2BK	NaN	NaN	NaN	NaN	NaN	NaN	NaN	NaN
DABRAFENIB	HUWE1	NaN	NaN	NaN	NaN	NaN	NaN	NaN	NaN
DABRAFENIB	IDH1	NaN	NaN	NaN	NaN	NaN	NaN	NaN	NaN
DABRAFENIB	IDH2	NaN	NaN	NaN	NaN	NaN	NaN	NaN	NaN
DABRAFENIB	IGLL5	NaN	NaN	NaN	NaN	NaN	NaN	NaN	NaN
DABRAFENIB	IRF4	NaN	NaN	NaN	NaN	NaN	NaN	NaN	NaN
DABRAFENIB	KDM5C	NaN	NaN	NaN	NaN	NaN	NaN	NaN	NaN
DABRAFENIB	KDM6A	NaN	NaN	NaN	NaN	NaN	NaN	NaN	NaN
DABRAFENIB	KLHL6	NaN	NaN	NaN	NaN	NaN	NaN	NaN	NaN
DABRAFENIB	KMT2B	NaN	NaN	NaN	NaN	NaN	NaN	NaN	NaN
DABRAFENIB	KMT2C	NaN	NaN	NaN	NaN	NaN	NaN	NaN	NaN
DABRAFENIB	KRAS	NaN	NaN	-1.6982	0.54091	NaN	NaN	20.825	41.1092
DABRAFENIB	LCE1D	NaN	NaN	NaN	NaN	NaN	NaN	NaN	NaN
DABRAFENIB	LTB	NaN	NaN	NaN	NaN	NaN	NaN	NaN	NaN
DABRAFENIB	MAF	NaN	NaN	NaN	NaN	NaN	NaN	NaN	NaN
DABRAFENIB	MAFB	NaN	NaN	NaN	NaN	NaN	NaN	NaN	NaN
DABRAFENIB	MAML2	NaN	NaN	NaN	NaN	NaN	NaN	NaN	NaN
DABRAFENIB	MAN2C1	NaN	NaN	NaN	NaN	NaN	NaN	NaN	NaN
DABRAFENIB	NCOR1	NaN	NaN	NaN	NaN	NaN	NaN	NaN	NaN
DABRAFENIB	NF1	NaN	NaN	NaN	NaN	NaN	NaN	NaN	NaN
DABRAFENIB	NFKB2	NaN	NaN	NaN	NaN	NaN	NaN	NaN	NaN
DABRAFENIB	NFKBIA	NaN	NaN	NaN	NaN	NaN	NaN	NaN	NaN
DABRAFENIB	NRAS	NaN	NaN	NaN	NaN	NaN	NaN	NaN	NaN
DABRAFENIB	PABPC1	NaN	NaN	NaN	NaN	NaN	NaN	NaN	NaN
DABRAFENIB	PIK3CA	NaN	NaN	NaN	NaN	NaN	NaN	NaN	NaN
DABRAFENIB	PIM1	NaN	NaN	NaN	NaN	NaN	NaN	NaN	NaN
DABRAFENIB	POT1	NaN	NaN	NaN	NaN	NaN	NaN	NaN	NaN
DABRAFENIB	PRDM1	NaN	NaN	NaN	NaN	NaN	NaN	NaN	NaN
DABRAFENIB	PRKD2	NaN	NaN	NaN	NaN	NaN	NaN	NaN	NaN
DABRAFENIB	PTPN11	NaN	NaN	NaN	NaN	NaN	NaN	NaN	NaN
DABRAFENIB	RASA2	NaN	NaN	NaN	NaN	NaN	NaN	NaN	NaN
DABRAFENIB	RB1	NaN	NaN	NaN	NaN	NaN	NaN	NaN	NaN
DABRAFENIB	RFTN1	NaN	NaN	NaN	NaN	NaN	NaN	NaN	NaN
DABRAFENIB	RPL10	NaN	NaN	NaN	NaN	NaN	NaN	NaN	NaN
DABRAFENIB	RPL5	NaN	NaN	NaN	NaN	NaN	NaN	NaN	NaN
DABRAFENIB	RPRD1B	NaN	NaN	NaN	NaN	NaN	NaN	NaN	NaN
DABRAFENIB	RPS3A	NaN	NaN	NaN	NaN	NaN	NaN	NaN	NaN
DABRAFENIB	SAMHD1	NaN	NaN	NaN	NaN	NaN	NaN	NaN	NaN
DABRAFENIB	SETD2	NaN	NaN	NaN	NaN	NaN	NaN	NaN	NaN
DABRAFENIB	SF3B1	NaN	NaN	NaN	NaN	NaN	NaN	NaN	NaN
DABRAFENIB	SP140	NaN	NaN	NaN	NaN	NaN	NaN	NaN	NaN
DABRAFENIB	TCL1A	NaN	NaN	NaN	NaN	NaN	NaN	NaN	NaN
DABRAFENIB	TET2	NaN	NaN	NaN	NaN	NaN	NaN	NaN	NaN
DABRAFENIB	TGDS	NaN	NaN	NaN	NaN	NaN	NaN	NaN	NaN
DABRAFENIB	TP53	NaN	NaN	NaN	NaN	NaN	NaN	NaN	NaN
DABRAFENIB	TRAF2	NaN	NaN	NaN	NaN	NaN	NaN	NaN	NaN
DABRAFENIB	TRAF3	NaN	NaN	NaN	NaN	NaN	NaN	NaN	NaN
DABRAFENIB	UBR5	NaN	NaN	NaN	NaN	NaN	NaN	NaN	NaN
DABRAFENIB	XBP1	NaN	NaN	NaN	NaN	NaN	NaN	NaN	NaN
DABRAFENIB	ZFP36L1	NaN	NaN	NaN	NaN	NaN	NaN	NaN	NaN
DABRAFENIB	ZNF292	NaN	NaN	NaN	NaN	NaN	NaN	NaN	NaN
DARATUMUMAB	ABCF1	NaN	NaN	NaN	NaN	NaN	NaN	NaN	NaN
DARATUMUMAB	ACTG1	NaN	NaN	NaN	NaN	NaN	NaN	NaN	NaN
DARATUMUMAB	ARID1A	NaN	NaN	NaN	NaN	NaN	NaN	NaN	NaN
DARATUMUMAB	ARID2	NaN	NaN	NaN	NaN	NaN	NaN	NaN	NaN
DARATUMUMAB	ATM	NaN	NaN	NaN	NaN	NaN	NaN	NaN	NaN
DARATUMUMAB	ATRX	NaN	NaN	NaN	NaN	NaN	NaN	NaN	NaN
DARATUMUMAB	BCL7A	NaN	NaN	NaN	NaN	NaN	NaN	NaN	NaN
DARATUMUMAB	BHLHE41	NaN	NaN	NaN	NaN	NaN	NaN	NaN	NaN
DARATUMUMAB	BRAF	NaN	NaN	NaN	NaN	NaN	NaN	NaN	NaN
DARATUMUMAB	BTG1	NaN	NaN	-6.09328	0.490045	NaN	NaN	6.28891	35.2833
DARATUMUMAB	CCND1	NaN	NaN	NaN	NaN	NaN	NaN	NaN	NaN
DARATUMUMAB	CDKN1B	NaN	NaN	NaN	NaN	NaN	NaN	NaN	NaN
DARATUMUMAB	CDKN2C	NaN	NaN	NaN	NaN	NaN	NaN	NaN	NaN
DARATUMUMAB	CREBBP	NaN	NaN	4.84137	0.7933	NaN	NaN	6.10841	53.9444
DARATUMUMAB	CYLD	NaN	NaN	6.19511	0.269694	NaN	NaN	10.3832	20.4967
DARATUMUMAB	DIS3	NaN	NaN	NaN	NaN	NaN	NaN	NaN	NaN
DARATUMUMAB	DNMT3A	NaN	NaN	NaN	NaN	NaN	NaN	NaN	NaN
DARATUMUMAB	DTX1	NaN	NaN	NaN	NaN	NaN	NaN	NaN	NaN
DARATUMUMAB	DUSP2	NaN	NaN	NaN	NaN	NaN	NaN	NaN	NaN
DARATUMUMAB	EGR1	NaN	NaN	NaN	NaN	NaN	NaN	NaN	NaN
DARATUMUMAB	EP300	NaN	NaN	NaN	NaN	NaN	NaN	NaN	NaN
DARATUMUMAB	FGFR3	NaN	NaN	NaN	NaN	NaN	NaN	NaN	NaN
DARATUMUMAB	FUBP1	NaN	NaN	NaN	NaN	NaN	NaN	NaN	NaN
DARATUMUMAB	HIST1H1B	NaN	NaN	NaN	NaN	NaN	NaN	NaN	NaN
DARATUMUMAB	HIST1H1D	NaN	NaN	NaN	NaN	NaN	NaN	NaN	NaN
DARATUMUMAB	HIST1H1E	NaN	NaN	-4.84137	0.502214	NaN	NaN	4.83381	35.155
DARATUMUMAB	HIST1H2BK	NaN	NaN	NaN	NaN	NaN	NaN	NaN	NaN
DARATUMUMAB	HUWE1	NaN	NaN	NaN	NaN	NaN	NaN	NaN	NaN
DARATUMUMAB	IDH1	NaN	NaN	NaN	NaN	NaN	NaN	NaN	NaN
DARATUMUMAB	IDH2	NaN	NaN	NaN	NaN	NaN	NaN	NaN	NaN
DARATUMUMAB	IGLL5	NaN	NaN	6.19511	0.269694	NaN	NaN	6.92214	20.227
DARATUMUMAB	IRF4	NaN	NaN	NaN	NaN	NaN	NaN	NaN	NaN
DARATUMUMAB	KDM5C	NaN	NaN	NaN	NaN	NaN	NaN	NaN	NaN
DARATUMUMAB	KDM6A	NaN	NaN	NaN	NaN	NaN	NaN	NaN	NaN
DARATUMUMAB	KLHL6	NaN	NaN	NaN	NaN	NaN	NaN	NaN	NaN
DARATUMUMAB	KMT2B	NaN	NaN	NaN	NaN	NaN	NaN	NaN	NaN
DARATUMUMAB	KMT2C	NaN	NaN	-4.84137	0.502214	NaN	NaN	4.29672	34.6528
DARATUMUMAB	KRAS	NaN	NaN	-6.18801	0.22246	NaN	NaN	17.1294	17.1294
DARATUMUMAB	LCE1D	NaN	NaN	NaN	NaN	NaN	NaN	NaN	NaN
DARATUMUMAB	LTB	NaN	NaN	NaN	NaN	NaN	NaN	NaN	NaN
DARATUMUMAB	MAF	NaN	NaN	NaN	NaN	NaN	NaN	NaN	NaN
DARATUMUMAB	MAFB	NaN	NaN	NaN	NaN	NaN	NaN	NaN	NaN
DARATUMUMAB	MAML2	NaN	NaN	NaN	NaN	NaN	NaN	NaN	NaN
DARATUMUMAB	MAN2C1	NaN	NaN	NaN	NaN	NaN	NaN	NaN	NaN
DARATUMUMAB	NCOR1	NaN	NaN	NaN	NaN	NaN	NaN	NaN	NaN
DARATUMUMAB	NF1	NaN	NaN	NaN	NaN	NaN	NaN	NaN	NaN
DARATUMUMAB	NFKB2	NaN	NaN	NaN	NaN	NaN	NaN	NaN	NaN
DARATUMUMAB	NFKBIA	NaN	NaN	NaN	NaN	NaN	NaN	NaN	NaN
DARATUMUMAB	NRAS	NaN	NaN	-6.09328	0.490045	NaN	NaN	5.3905	34.7932
DARATUMUMAB	PABPC1	NaN	NaN	NaN	NaN	NaN	NaN	NaN	NaN
DARATUMUMAB	PIK3CA	NaN	NaN	NaN	NaN	NaN	NaN	NaN	NaN
DARATUMUMAB	PIM1	NaN	NaN	NaN	NaN	NaN	NaN	NaN	NaN
DARATUMUMAB	POT1	NaN	NaN	NaN	NaN	NaN	NaN	NaN	NaN
DARATUMUMAB	PRDM1	NaN	NaN	NaN	NaN	NaN	NaN	NaN	NaN
DARATUMUMAB	PRKD2	NaN	NaN	NaN	NaN	NaN	NaN	NaN	NaN
DARATUMUMAB	PTPN11	NaN	NaN	NaN	NaN	NaN	NaN	NaN	NaN
DARATUMUMAB	RASA2	NaN	NaN	NaN	NaN	NaN	NaN	NaN	NaN
DARATUMUMAB	RB1	NaN	NaN	NaN	NaN	NaN	NaN	NaN	NaN
DARATUMUMAB	RFTN1	NaN	NaN	NaN	NaN	NaN	NaN	NaN	NaN
DARATUMUMAB	RPL10	NaN	NaN	NaN	NaN	NaN	NaN	NaN	NaN
DARATUMUMAB	RPL5	NaN	NaN	NaN	NaN	NaN	NaN	NaN	NaN
DARATUMUMAB	RPRD1B	NaN	NaN	NaN	NaN	NaN	NaN	NaN	NaN
DARATUMUMAB	RPS3A	NaN	NaN	NaN	NaN	NaN	NaN	NaN	NaN
DARATUMUMAB	SAMHD1	NaN	NaN	NaN	NaN	NaN	NaN	NaN	NaN
DARATUMUMAB	SETD2	NaN	NaN	NaN	NaN	NaN	NaN	NaN	NaN
DARATUMUMAB	SF3B1	NaN	NaN	6.19511	0.269694	NaN	NaN	5.1916	19.9573
DARATUMUMAB	SP140	NaN	NaN	NaN	NaN	NaN	NaN	NaN	NaN
DARATUMUMAB	TCL1A	NaN	NaN	NaN	NaN	NaN	NaN	NaN	NaN
DARATUMUMAB	TET2	NaN	NaN	NaN	NaN	NaN	NaN	NaN	NaN
DARATUMUMAB	TGDS	NaN	NaN	NaN	NaN	NaN	NaN	NaN	NaN
DARATUMUMAB	TP53	NaN	NaN	NaN	NaN	NaN	NaN	NaN	NaN
DARATUMUMAB	TRAF2	NaN	NaN	NaN	NaN	NaN	NaN	NaN	NaN
DARATUMUMAB	TRAF3	NaN	NaN	6.19511	0.269694	NaN	NaN	4.15328	19.6876
DARATUMUMAB	UBR5	NaN	NaN	NaN	NaN	NaN	NaN	NaN	NaN
DARATUMUMAB	XBP1	NaN	NaN	NaN	NaN	NaN	NaN	NaN	NaN
DARATUMUMAB	ZFP36L1	NaN	NaN	NaN	NaN	NaN	NaN	NaN	NaN
DARATUMUMAB	ZNF292	NaN	NaN	NaN	NaN	NaN	NaN	NaN	NaN
DASATINIB	ABCF1	NaN	NaN	NaN	NaN	NaN	NaN	NaN	NaN
DASATINIB	ACTG1	NaN	NaN	NaN	NaN	NaN	NaN	NaN	NaN
DASATINIB	ARID1A	NaN	NaN	NaN	NaN	NaN	NaN	NaN	NaN
DASATINIB	ARID2	NaN	NaN	NaN	NaN	NaN	NaN	NaN	NaN
DASATINIB	ATM	NaN	NaN	NaN	NaN	NaN	NaN	NaN	NaN
DASATINIB	ATRX	NaN	NaN	NaN	NaN	NaN	NaN	NaN	NaN
DASATINIB	BCL7A	NaN	NaN	NaN	NaN	NaN	NaN	NaN	NaN
DASATINIB	BHLHE41	NaN	NaN	NaN	NaN	NaN	NaN	NaN	NaN
DASATINIB	BRAF	NaN	NaN	5.51374	0.0283717	NaN	NaN	2.18462	2.18462
DASATINIB	BTG1	NaN	NaN	NaN	NaN	NaN	NaN	NaN	NaN
DASATINIB	CCND1	NaN	NaN	NaN	NaN	NaN	NaN	NaN	NaN
DASATINIB	CDKN1B	NaN	NaN	NaN	NaN	NaN	NaN	NaN	NaN
DASATINIB	CDKN2C	NaN	NaN	NaN	NaN	NaN	NaN	NaN	NaN
DASATINIB	CREBBP	NaN	NaN	NaN	NaN	NaN	NaN	NaN	NaN
DASATINIB	CYLD	NaN	NaN	3.31683	0.402662	NaN	NaN	10.335	30.1997
DASATINIB	DIS3	NaN	NaN	NaN	NaN	NaN	NaN	NaN	NaN
DASATINIB	DNMT3A	NaN	NaN	NaN	NaN	NaN	NaN	NaN	NaN
DASATINIB	DTX1	NaN	NaN	NaN	NaN	NaN	NaN	NaN	NaN
DASATINIB	DUSP2	NaN	NaN	NaN	NaN	NaN	NaN	NaN	NaN
DASATINIB	EGR1	NaN	NaN	NaN	NaN	NaN	NaN	NaN	NaN
DASATINIB	EP300	NaN	NaN	NaN	NaN	NaN	NaN	NaN	NaN
DASATINIB	FGFR3	NaN	NaN	NaN	NaN	NaN	NaN	NaN	NaN
DASATINIB	FUBP1	NaN	NaN	NaN	NaN	NaN	NaN	NaN	NaN
DASATINIB	HIST1H1B	NaN	NaN	NaN	NaN	NaN	NaN	NaN	NaN
DASATINIB	HIST1H1D	NaN	NaN	NaN	NaN	NaN	NaN	NaN	NaN
DASATINIB	HIST1H1E	NaN	NaN	NaN	NaN	NaN	NaN	NaN	NaN
DASATINIB	HIST1H2BK	NaN	NaN	NaN	NaN	NaN	NaN	NaN	NaN
DASATINIB	HUWE1	NaN	NaN	NaN	NaN	NaN	NaN	NaN	NaN
DASATINIB	IDH1	NaN	NaN	NaN	NaN	NaN	NaN	NaN	NaN
DASATINIB	IDH2	NaN	NaN	NaN	NaN	NaN	NaN	NaN	NaN
DASATINIB	IGLL5	NaN	NaN	-2.10233	0.327942	NaN	NaN	12.6258	24.9236
DASATINIB	IRF4	NaN	NaN	NaN	NaN	NaN	NaN	NaN	NaN
DASATINIB	KDM5C	NaN	NaN	NaN	NaN	NaN	NaN	NaN	NaN
DASATINIB	KDM6A	NaN	NaN	NaN	NaN	NaN	NaN	NaN	NaN
DASATINIB	KLHL6	NaN	NaN	NaN	NaN	NaN	NaN	NaN	NaN
DASATINIB	KMT2B	NaN	NaN	3.32492	0.824931	NaN	NaN	9.07424	58.5701
DASATINIB	KMT2C	NaN	NaN	NaN	NaN	NaN	NaN	NaN	NaN
DASATINIB	KRAS	NaN	NaN	3.31683	0.435656	NaN	NaN	8.38637	32.2385
DASATINIB	LCE1D	NaN	NaN	NaN	NaN	NaN	NaN	NaN	NaN
DASATINIB	LTB	NaN	NaN	1.66907	0.987678	NaN	NaN	9.5064	69.1375
DASATINIB	MAF	NaN	NaN	NaN	NaN	NaN	NaN	NaN	NaN
DASATINIB	MAFB	NaN	NaN	NaN	NaN	NaN	NaN	NaN	NaN
DASATINIB	MAML2	NaN	NaN	NaN	NaN	NaN	NaN	NaN	NaN
DASATINIB	MAN2C1	NaN	NaN	NaN	NaN	NaN	NaN	NaN	NaN
DASATINIB	NCOR1	NaN	NaN	NaN	NaN	NaN	NaN	NaN	NaN
DASATINIB	NF1	NaN	NaN	NaN	NaN	NaN	NaN	NaN	NaN
DASATINIB	NFKB2	NaN	NaN	NaN	NaN	NaN	NaN	NaN	NaN
DASATINIB	NFKBIA	NaN	NaN	NaN	NaN	NaN	NaN	NaN	NaN
DASATINIB	NRAS	NaN	NaN	1.21839	0.640391	NaN	NaN	9.86202	46.7485
DASATINIB	PABPC1	NaN	NaN	NaN	NaN	NaN	NaN	NaN	NaN
DASATINIB	PIK3CA	NaN	NaN	NaN	NaN	NaN	NaN	NaN	NaN
DASATINIB	PIM1	NaN	NaN	NaN	NaN	NaN	NaN	NaN	NaN
DASATINIB	POT1	NaN	NaN	NaN	NaN	NaN	NaN	NaN	NaN
DASATINIB	PRDM1	NaN	NaN	1.21839	0.640391	NaN	NaN	8.21835	46.1081
DASATINIB	PRKD2	NaN	NaN	NaN	NaN	NaN	NaN	NaN	NaN
DASATINIB	PTPN11	NaN	NaN	NaN	NaN	NaN	NaN	NaN	NaN
DASATINIB	RASA2	NaN	NaN	NaN	NaN	NaN	NaN	NaN	NaN
DASATINIB	RB1	NaN	NaN	NaN	NaN	NaN	NaN	NaN	NaN
DASATINIB	RFTN1	NaN	NaN	NaN	NaN	NaN	NaN	NaN	NaN
DASATINIB	RPL10	NaN	NaN	NaN	NaN	NaN	NaN	NaN	NaN
DASATINIB	RPL5	NaN	NaN	NaN	NaN	NaN	NaN	NaN	NaN
DASATINIB	RPRD1B	NaN	NaN	NaN	NaN	NaN	NaN	NaN	NaN
DASATINIB	RPS3A	NaN	NaN	NaN	NaN	NaN	NaN	NaN	NaN
DASATINIB	SAMHD1	NaN	NaN	NaN	NaN	NaN	NaN	NaN	NaN
DASATINIB	SETD2	NaN	NaN	NaN	NaN	NaN	NaN	NaN	NaN
DASATINIB	SF3B1	NaN	NaN	NaN	NaN	NaN	NaN	NaN	NaN
DASATINIB	SP140	NaN	NaN	NaN	NaN	NaN	NaN	NaN	NaN
DASATINIB	TCL1A	NaN	NaN	NaN	NaN	NaN	NaN	NaN	NaN
DASATINIB	TET2	NaN	NaN	NaN	NaN	NaN	NaN	NaN	NaN
DASATINIB	TGDS	NaN	NaN	NaN	NaN	NaN	NaN	NaN	NaN
DASATINIB	TP53	NaN	NaN	NaN	NaN	NaN	NaN	NaN	NaN
DASATINIB	TRAF2	NaN	NaN	NaN	NaN	NaN	NaN	NaN	NaN
DASATINIB	TRAF3	NaN	NaN	NaN	NaN	NaN	NaN	NaN	NaN
DASATINIB	UBR5	NaN	NaN	NaN	NaN	NaN	NaN	NaN	NaN
DASATINIB	XBP1	NaN	NaN	NaN	NaN	NaN	NaN	NaN	NaN
DASATINIB	ZFP36L1	NaN	NaN	NaN	NaN	NaN	NaN	NaN	NaN
DASATINIB	ZNF292	NaN	NaN	NaN	NaN	NaN	NaN	NaN	NaN
DEX	ABCF1	NaN	NaN	1.76946	0.591232	NaN	NaN	1.2304	24.2405
DEX	ACTG1	-2.84743	0.445665	3.16976	0.798386	3.11966	29.8596	1.18222	20.758
DEX	ARID1A	NaN	NaN	0.0343657	0.713038	NaN	NaN	1.14383	21.3912
DEX	ARID2	NaN	NaN	2.54212	0.770093	NaN	NaN	1.18594	21.5626
DEX	ATM	-4.22635	0.417305	-0.278059	0.614558	4.59036	29.6287	1.15417	22.7386
DEX	ATRX	NaN	NaN	3.32815	0.839233	NaN	NaN	1.17493	19.3024
DEX	BCL7A	3.01877	0.923911	-0.385423	0.478039	3.95229	55.4347	1.67314	26.7702
DEX	BHLHE41	NaN	NaN	NaN	NaN	NaN	NaN	NaN	NaN
DEX	BRAF	4.41377	0.235743	0.126673	0.610048	9.07612	17.9165	1.20445	23.7919
DEX	BTG1	-4.14086	0.41837	-1.00329	0.494384	3.57939	28.8676	1.40991	25.2136
DEX	CCND1	NaN	NaN	0.0981897	0.645088	NaN	NaN	1.07982	20.6428
DEX	CDKN1B	NaN	NaN	0.152514	0.101845	NaN	NaN	1.96051	7.53649
DEX	CDKN2C	NaN	NaN	NaN	NaN	NaN	NaN	NaN	NaN
DEX	CREBBP	3.76121	0.468085	-0.25192	0.411217	2.77251	30.4256	1.86257	25.0842
DEX	CYLD	NaN	NaN	3.7454	0.239543	NaN	NaN	2.04943	16.5285
DEX	DIS3	-1.70501	0.495887	-0.521293	0.710994	2.54556	31.2409	1.16482	22.0408
DEX	DNMT3A	NaN	NaN	NaN	NaN	NaN	NaN	NaN	NaN
DEX	DTX1	-4.22635	0.417305	-1.1002	0.493327	4.01656	29.2114	1.46101	25.653
DEX	DUSP2	NaN	NaN	0.191585	0.100775	NaN	NaN	2.58655	7.55809
DEX	EGR1	NaN	NaN	0.20776	0.515123	NaN	NaN	1.23951	23.6956
DEX	EP300	NaN	NaN	-0.430042	0.634108	NaN	NaN	1.1355	22.1938
DEX	FGFR3	NaN	NaN	3.32027	0.837082	NaN	NaN	1.19362	20.09
DEX	FUBP1	NaN	NaN	-0.313557	0.42751	NaN	NaN	1.73254	25.2231
DEX	HIST1H1B	NaN	NaN	NaN	NaN	NaN	NaN	NaN	NaN
DEX	HIST1H1D	3.01877	0.923911	-0.0738361	0.473201	3.74427	54.5108	1.82182	27.4456
DEX	HIST1H1E	NaN	NaN	0.22283	0.34369	NaN	NaN	2.20534	22.6835
DEX	HIST1H2BK	NaN	NaN	5.37947	0.164466	NaN	NaN	1.58299	11.5126
DEX	HUWE1	3.74804	0.477114	-0.547555	0.500449	2.62412	30.5353	1.37623	25.0224
DEX	IDH1	NaN	NaN	4.30054	0.776878	NaN	NaN	1.17293	20.9757
DEX	IDH2	NaN	NaN	NaN	NaN	NaN	NaN	NaN	NaN
DEX	IGLL5	NaN	NaN	0.152514	0.892417	NaN	NaN	1.22707	19.6332
DEX	IRF4	NaN	NaN	-0.0185148	0.721579	NaN	NaN	1.13391	20.9258
DEX	KDM5C	NaN	NaN	NaN	NaN	NaN	NaN	NaN	NaN
DEX	KDM6A	NaN	NaN	-0.0564852	0.508898	NaN	NaN	1.26404	23.9182
DEX	KLHL6	NaN	NaN	-0.0799652	0.39252	NaN	NaN	2.01494	24.7288
DEX	KMT2B	NaN	NaN	0.0950048	0.560697	NaN	NaN	1.23353	24.11
DEX	KMT2C	NaN	NaN	6.16979	0.000106521	NaN	NaN	0.00820214	0.00820214
DEX	KRAS	3.74804	0.379357	-0.0816084	0.116362	9.73683	28.4518	1.79198	8.49443
DEX	LCE1D	NaN	NaN	NaN	NaN	NaN	NaN	NaN	NaN
DEX	LTB	-4.4968	0.414329	-0.773844	0.401807	7.97584	30.6604	1.9337	24.912
DEX	MAF	4.45356	0.0673753	0.631409	0.585173	5.1879	5.1879	1.25162	24.5773
DEX	MAFB	NaN	NaN	NaN	NaN	NaN	NaN	NaN	NaN
DEX	MAML2	NaN	NaN	-0.231353	0.639799	NaN	NaN	1.09477	21.1134
DEX	MAN2C1	NaN	NaN	NaN	NaN	NaN	NaN	NaN	NaN
DEX	NCOR1	NaN	NaN	2.54331	0.595892	NaN	NaN	1.20746	23.8357
DEX	NF1	-2.84743	0.445665	-0.430042	0.480239	2.85969	29.4139	1.54077	25.9329
DEX	NFKB2	NaN	NaN	2.62508	0.0820116	NaN	NaN	3.15745	6.23288
DEX	NFKBIA	NaN	NaN	NaN	NaN	NaN	NaN	NaN	NaN
DEX	NRAS	2.3504	0.944514	-0.0505751	0.521824	3.46322	53.8373	1.21759	23.4821
DEX	PABPC1	NaN	NaN	NaN	NaN	NaN	NaN	NaN	NaN
DEX	PIK3CA	NaN	NaN	1.72965	0.475361	NaN	NaN	1.74299	27.0956
DEX	PIM1	NaN	NaN	NaN	NaN	NaN	NaN	NaN	NaN
DEX	POT1	-1.70501	0.495887	0.152835	0.997451	2.38646	30.745	1.30176	18.9516
DEX	PRDM1	-4.07911	0.419181	-0.10845	0.340252	3.22769	28.5043	2.38177	22.7969
DEX	PRKD2	NaN	NaN	-0.105713	0.508531	NaN	NaN	1.30523	24.4095
DEX	PTPN11	NaN	NaN	-0.46483	0.25917	NaN	NaN	1.99561	17.6235
DEX	RASA2	NaN	NaN	3.98417	0.93074	NaN	NaN	1.25732	19.5455
DEX	RB1	3.01877	0.923911	-0.147086	0.821357	3.55706	53.5868	1.19329	20.5339
DEX	RFTN1	NaN	NaN	NaN	NaN	NaN	NaN	NaN	NaN
DEX	RPL10	NaN	NaN	4.15585	0.142017	NaN	NaN	1.56219	10.0832
DEX	RPL5	NaN	NaN	5.85932	0.117559	NaN	NaN	1.50868	8.46426
DEX	RPRD1B	NaN	NaN	NaN	NaN	NaN	NaN	NaN	NaN
DEX	RPS3A	NaN	NaN	NaN	NaN	NaN	NaN	NaN	NaN
DEX	SAMHD1	-1.70501	0.495887	-0.93043	0.631434	2.24608	30.2491	1.15763	22.7316
DEX	SETD2	NaN	NaN	2.02019	0.613752	NaN	NaN	1.18147	23.3226
DEX	SF3B1	NaN	NaN	2.52693	0.531364	NaN	NaN	1.20338	23.38
DEX	SP140	NaN	NaN	-0.201566	0.387626	NaN	NaN	2.13194	24.8081
DEX	TCL1A	NaN	NaN	NaN	NaN	NaN	NaN	NaN	NaN
DEX	TET2	NaN	NaN	1.01734	0.505321	NaN	NaN	1.34172	24.7607
DEX	TGDS	NaN	NaN	-0.0185148	0.418264	NaN	NaN	1.78924	25.0958
DEX	TP53	-4.4968	0.414329	0.255032	0.479929	6.38067	30.2461	1.60672	26.3961
DEX	TRAF2	NaN	NaN	-0.0491671	0.35368	NaN	NaN	2.09488	22.9892
DEX	TRAF3	NaN	NaN	1.19047	0.944869	NaN	NaN	1.25439	18.8974
DEX	UBR5	-4.4968	0.414329	0.0981897	0.492456	5.31723	29.8317	1.51676	26.1002
DEX	XBP1	NaN	NaN	NaN	NaN	NaN	NaN	NaN	NaN
DEX	ZFP36L1	NaN	NaN	NaN	NaN	NaN	NaN	NaN	NaN
DEX	ZNF292	NaN	NaN	-0.436176	0.636911	NaN	NaN	1.11459	21.655
DINACICLIB	ABCF1	NaN	NaN	NaN	NaN	NaN	NaN	NaN	NaN
DINACICLIB	ACTG1	NaN	NaN	NaN	NaN	NaN	NaN	NaN	NaN
DINACICLIB	ARID1A	0	0.624059	2.37745	7.92e-05	2.00219	33.6992	0.00304821	0.00601724
DINACICLIB	ARID2	1.24286	0.516352	0.729179	0.851588	1.98795	29.9484	2.4286	43.431
DINACICLIB	ATM	NaN	NaN	NaN	NaN	NaN	NaN	NaN	NaN
DINACICLIB	ATRX	NaN	NaN	NaN	NaN	NaN	NaN	NaN	NaN
DINACICLIB	BCL7A	NaN	NaN	NaN	NaN	NaN	NaN	NaN	NaN
DINACICLIB	BHLHE41	NaN	NaN	NaN	NaN	NaN	NaN	NaN	NaN
DINACICLIB	BRAF	0.156119	0.703596	-0.159702	0.445767	2.08373	36.587	2.86034	29.4206
DINACICLIB	BTG1	NaN	NaN	NaN	NaN	NaN	NaN	NaN	NaN
DINACICLIB	CCND1	NaN	NaN	NaN	NaN	NaN	NaN	NaN	NaN
DINACICLIB	CDKN1B	NaN	NaN	NaN	NaN	NaN	NaN	NaN	NaN
DINACICLIB	CDKN2C	NaN	NaN	NaN	NaN	NaN	NaN	NaN	NaN
DINACICLIB	CREBBP	1.04827	0.723891	0.359379	0.85711	2.06443	36.9184	2.27577	41.9984
DINACICLIB	CYLD	0.444785	0.822581	-0.192188	0.856426	2.11129	39.4839	2.35517	42.8213
DINACICLIB	DIS3	0.0297473	0.49571	0.178579	0.742758	2.00893	29.2469	2.38301	40.1089
DINACICLIB	DNMT3A	NaN	NaN	NaN	NaN	NaN	NaN	NaN	NaN
DINACICLIB	DTX1	NaN	NaN	NaN	NaN	NaN	NaN	NaN	NaN
DINACICLIB	DUSP2	NaN	NaN	NaN	NaN	NaN	NaN	NaN	NaN
DINACICLIB	EGR1	NaN	NaN	NaN	NaN	NaN	NaN	NaN	NaN
DINACICLIB	EP300	1.36003	0.416361	0.979735	0.627561	1.88587	25.398	2.30106	35.771
DINACICLIB	FGFR3	-0.18124	0.5674	-0.0532778	0.746281	1.89956	31.207	2.29854	39.5529
DINACICLIB	FUBP1	NaN	NaN	NaN	NaN	NaN	NaN	NaN	NaN
DINACICLIB	HIST1H1B	NaN	NaN	NaN	NaN	NaN	NaN	NaN	NaN
DINACICLIB	HIST1H1D	-1.1488	0.217415	-2.17363	0.224191	2.09262	15.219	4.31568	16.5901
DINACICLIB	HIST1H1E	-0.237692	0.15109	0.215008	0.491211	3.87798	11.3318	2.52155	30.9463
DINACICLIB	HIST1H2BK	NaN	NaN	NaN	NaN	NaN	NaN	NaN	NaN
DINACICLIB	HUWE1	NaN	NaN	NaN	NaN	NaN	NaN	NaN	NaN
DINACICLIB	IDH1	NaN	NaN	NaN	NaN	NaN	NaN	NaN	NaN
DINACICLIB	IDH2	NaN	NaN	NaN	NaN	NaN	NaN	NaN	NaN
DINACICLIB	IGLL5	0.463174	0.553568	0.472017	0.972389	2.02975	31.5534	2.4958	46.6747
DINACICLIB	IRF4	NaN	NaN	NaN	NaN	NaN	NaN	NaN	NaN
DINACICLIB	KDM5C	NaN	NaN	NaN	NaN	NaN	NaN	NaN	NaN
DINACICLIB	KDM6A	2.04564	0.0482158	1.41345	0.447749	3.71262	3.71262	2.65205	29.1037
DINACICLIB	KLHL6	1.02926	0.744039	0.526285	0.979313	2.04611	37.202	2.43249	46.0277
DINACICLIB	KMT2B	-0.141356	0.816837	-0.104436	0.791159	2.16884	40.025	2.34305	41.1402
DINACICLIB	KMT2C	1.20076	0.264858	0.780673	0.695525	1.6995	17.4806	2.43434	38.9494
DINACICLIB	KRAS	-0.237692	0.297319	0.209517	0.395408	1.52624	18.7311	3.04465	26.8878
DINACICLIB	LCE1D	NaN	NaN	NaN	NaN	NaN	NaN	NaN	NaN
DINACICLIB	LTB	-1.05789	0.22916	-1.8076	0.251314	1.76453	15.5829	3.87024	18.3459
DINACICLIB	MAF	NaN	NaN	NaN	NaN	NaN	NaN	NaN	NaN
DINACICLIB	MAFB	NaN	NaN	NaN	NaN	NaN	NaN	NaN	NaN
DINACICLIB	MAML2	NaN	NaN	NaN	NaN	NaN	NaN	NaN	NaN
DINACICLIB	MAN2C1	NaN	NaN	NaN	NaN	NaN	NaN	NaN	NaN
DINACICLIB	NCOR1	-1.39088	0.191212	-1.26231	0.313586	2.94467	13.9585	3.01826	21.951
DINACICLIB	NF1	-0.18124	0.255596	-0.0532778	0.497168	1.78917	17.1249	2.39262	30.8244
DINACICLIB	NFKB2	NaN	NaN	NaN	NaN	NaN	NaN	NaN	NaN
DINACICLIB	NFKBIA	NaN	NaN	NaN	NaN	NaN	NaN	NaN	NaN
DINACICLIB	NRAS	0.115477	0.425686	-0.056424	0.589131	1.82099	25.5412	2.26815	34.1696
DINACICLIB	PABPC1	NaN	NaN	NaN	NaN	NaN	NaN	NaN	NaN
DINACICLIB	PIK3CA	NaN	NaN	NaN	NaN	NaN	NaN	NaN	NaN
DINACICLIB	PIM1	NaN	NaN	NaN	NaN	NaN	NaN	NaN	NaN
DINACICLIB	POT1	-0.169925	0.561767	-0.178727	0.571593	1.96619	31.459	2.31646	33.724
DINACICLIB	PRDM1	NaN	NaN	NaN	NaN	NaN	NaN	NaN	NaN
DINACICLIB	PRKD2	-0.239338	0.202927	0.274018	0.554284	2.23219	14.4078	2.3711	33.257
DINACICLIB	PTPN11	NaN	NaN	NaN	NaN	NaN	NaN	NaN	NaN
DINACICLIB	RASA2	1.89054	0.049826	1.29647	1.69e-05	1.9183	3.78677	0.00129853	0.00129853
DINACICLIB	RB1	-0.678072	0.223905	-0.583962	0.287005	1.91563	15.4495	3.15705	20.3773
DINACICLIB	RFTN1	NaN	NaN	NaN	NaN	NaN	NaN	NaN	NaN
DINACICLIB	RPL10	NaN	NaN	NaN	NaN	NaN	NaN	NaN	NaN
DINACICLIB	RPL5	-0.660483	0.297119	-0.715331	0.421022	1.63415	19.0156	2.94715	28.2085
DINACICLIB	RPRD1B	NaN	NaN	NaN	NaN	NaN	NaN	NaN	NaN
DINACICLIB	RPS3A	NaN	NaN	NaN	NaN	NaN	NaN	NaN	NaN
DINACICLIB	SAMHD1	NaN	NaN	NaN	NaN	NaN	NaN	NaN	NaN
DINACICLIB	SETD2	-1.39088	0.191212	-1.26231	0.313586	2.45389	13.7673	2.6829	21.6374
DINACICLIB	SF3B1	NaN	NaN	NaN	NaN	NaN	NaN	NaN	NaN
DINACICLIB	SP140	-0.669633	0.295184	-0.443033	0.472708	1.7484	19.1869	2.59989	30.2533
DINACICLIB	TCL1A	NaN	NaN	NaN	NaN	NaN	NaN	NaN	NaN
DINACICLIB	TET2	0.196397	0.696252	-0.8803	0.718125	2.14446	36.9014	2.40416	39.4969
DINACICLIB	TGDS	NaN	NaN	NaN	NaN	NaN	NaN	NaN	NaN
DINACICLIB	TP53	-0.103836	0.988329	-0.0443958	0.104285	2.45488	46.4515	2.67666	7.82141
DINACICLIB	TRAF2	NaN	NaN	NaN	NaN	NaN	NaN	NaN	NaN
DINACICLIB	TRAF3	-0.874239	0.319175	-1.21508	0.255551	1.53603	19.7888	3.27957	18.3997
DINACICLIB	UBR5	1.88264	0.168169	1.29098	0.503786	3.23726	12.4445	2.28185	30.7309
DINACICLIB	XBP1	NaN	NaN	NaN	NaN	NaN	NaN	NaN	NaN
DINACICLIB	ZFP36L1	NaN	NaN	NaN	NaN	NaN	NaN	NaN	NaN
DINACICLIB	ZNF292	NaN	NaN	NaN	NaN	NaN	NaN	NaN	NaN
DOVITINIB	ABCF1	NaN	NaN	NaN	NaN	NaN	NaN	NaN	NaN
DOVITINIB	ACTG1	NaN	NaN	NaN	NaN	NaN	NaN	NaN	NaN
DOVITINIB	ARID1A	-0.570688	0.576184	-0.626351	0.534968	22.1831	43.79	10.2981	39.5876
DOVITINIB	ARID2	NaN	NaN	NaN	NaN	NaN	NaN	NaN	NaN
DOVITINIB	ATM	NaN	NaN	NaN	NaN	NaN	NaN	NaN	NaN
DOVITINIB	ATRX	NaN	NaN	NaN	NaN	NaN	NaN	NaN	NaN
DOVITINIB	BCL7A	NaN	NaN	NaN	NaN	NaN	NaN	NaN	NaN
DOVITINIB	BHLHE41	NaN	NaN	NaN	NaN	NaN	NaN	NaN	NaN
DOVITINIB	BRAF	NaN	NaN	NaN	NaN	NaN	NaN	NaN	NaN
DOVITINIB	BTG1	NaN	NaN	NaN	NaN	NaN	NaN	NaN	NaN
DOVITINIB	CCND1	NaN	NaN	NaN	NaN	NaN	NaN	NaN	NaN
DOVITINIB	CDKN1B	NaN	NaN	NaN	NaN	NaN	NaN	NaN	NaN
DOVITINIB	CDKN2C	NaN	NaN	NaN	NaN	NaN	NaN	NaN	NaN
DOVITINIB	CREBBP	NaN	NaN	NaN	NaN	NaN	NaN	NaN	NaN
DOVITINIB	CYLD	-0.155651	0.978092	0.033991	0.679844	25.1044	73.3569	10.4696	49.6286
DOVITINIB	DIS3	NaN	NaN	NaN	NaN	NaN	NaN	NaN	NaN
DOVITINIB	DNMT3A	NaN	NaN	NaN	NaN	NaN	NaN	NaN	NaN
DOVITINIB	DTX1	NaN	NaN	NaN	NaN	NaN	NaN	NaN	NaN
DOVITINIB	DUSP2	NaN	NaN	NaN	NaN	NaN	NaN	NaN	NaN
DOVITINIB	EGR1	NaN	NaN	NaN	NaN	NaN	NaN	NaN	NaN
DOVITINIB	EP300	NaN	NaN	NaN	NaN	NaN	NaN	NaN	NaN
DOVITINIB	FGFR3	NaN	NaN	NaN	NaN	NaN	NaN	NaN	NaN
DOVITINIB	FUBP1	NaN	NaN	NaN	NaN	NaN	NaN	NaN	NaN
DOVITINIB	HIST1H1B	NaN	NaN	NaN	NaN	NaN	NaN	NaN	NaN
DOVITINIB	HIST1H1D	NaN	NaN	NaN	NaN	NaN	NaN	NaN	NaN
DOVITINIB	HIST1H1E	-0.0890835	0.984382	1.32878	0.499277	18.9494	72.8443	38.4443	38.4443
DOVITINIB	HIST1H2BK	NaN	NaN	NaN	NaN	NaN	NaN	NaN	NaN
DOVITINIB	HUWE1	NaN	NaN	NaN	NaN	NaN	NaN	NaN	NaN
DOVITINIB	IDH1	NaN	NaN	NaN	NaN	NaN	NaN	NaN	NaN
DOVITINIB	IDH2	NaN	NaN	NaN	NaN	NaN	NaN	NaN	NaN
DOVITINIB	IGLL5	0.451107	0.450377	1.1412	0.933017	34.6791	34.6791	11.9737	67.1772
DOVITINIB	IRF4	NaN	NaN	NaN	NaN	NaN	NaN	NaN	NaN
DOVITINIB	KDM5C	NaN	NaN	NaN	NaN	NaN	NaN	NaN	NaN
DOVITINIB	KDM6A	NaN	NaN	NaN	NaN	NaN	NaN	NaN	NaN
DOVITINIB	KLHL6	NaN	NaN	NaN	NaN	NaN	NaN	NaN	NaN
DOVITINIB	KMT2B	NaN	NaN	NaN	NaN	NaN	NaN	NaN	NaN
DOVITINIB	KMT2C	NaN	NaN	NaN	NaN	NaN	NaN	NaN	NaN
DOVITINIB	KRAS	-0.0890835	0.984382	1.32878	0.499277	15.1595	71.8599	19.2221	37.945
DOVITINIB	LCE1D	NaN	NaN	NaN	NaN	NaN	NaN	NaN	NaN
DOVITINIB	LTB	NaN	NaN	NaN	NaN	NaN	NaN	NaN	NaN
DOVITINIB	MAF	NaN	NaN	NaN	NaN	NaN	NaN	NaN	NaN
DOVITINIB	MAFB	NaN	NaN	NaN	NaN	NaN	NaN	NaN	NaN
DOVITINIB	MAML2	NaN	NaN	NaN	NaN	NaN	NaN	NaN	NaN
DOVITINIB	MAN2C1	NaN	NaN	NaN	NaN	NaN	NaN	NaN	NaN
DOVITINIB	NCOR1	NaN	NaN	NaN	NaN	NaN	NaN	NaN	NaN
DOVITINIB	NF1	NaN	NaN	NaN	NaN	NaN	NaN	NaN	NaN
DOVITINIB	NFKB2	NaN	NaN	NaN	NaN	NaN	NaN	NaN	NaN
DOVITINIB	NFKBIA	NaN	NaN	NaN	NaN	NaN	NaN	NaN	NaN
DOVITINIB	NRAS	NaN	NaN	NaN	NaN	NaN	NaN	NaN	NaN
DOVITINIB	PABPC1	NaN	NaN	NaN	NaN	NaN	NaN	NaN	NaN
DOVITINIB	PIK3CA	NaN	NaN	NaN	NaN	NaN	NaN	NaN	NaN
DOVITINIB	PIM1	NaN	NaN	NaN	NaN	NaN	NaN	NaN	NaN
DOVITINIB	POT1	NaN	NaN	NaN	NaN	NaN	NaN	NaN	NaN
DOVITINIB	PRDM1	NaN	NaN	NaN	NaN	NaN	NaN	NaN	NaN
DOVITINIB	PRKD2	-0.0890835	0.984382	1.32878	0.499277	12.6329	70.8755	12.8148	37.4457
DOVITINIB	PTPN11	NaN	NaN	NaN	NaN	NaN	NaN	NaN	NaN
DOVITINIB	RASA2	NaN	NaN	NaN	NaN	NaN	NaN	NaN	NaN
DOVITINIB	RB1	NaN	NaN	NaN	NaN	NaN	NaN	NaN	NaN
DOVITINIB	RFTN1	NaN	NaN	NaN	NaN	NaN	NaN	NaN	NaN
DOVITINIB	RPL10	NaN	NaN	NaN	NaN	NaN	NaN	NaN	NaN
DOVITINIB	RPL5	NaN	NaN	NaN	NaN	NaN	NaN	NaN	NaN
DOVITINIB	RPRD1B	NaN	NaN	NaN	NaN	NaN	NaN	NaN	NaN
DOVITINIB	RPS3A	NaN	NaN	NaN	NaN	NaN	NaN	NaN	NaN
DOVITINIB	SAMHD1	NaN	NaN	NaN	NaN	NaN	NaN	NaN	NaN
DOVITINIB	SETD2	NaN	NaN	NaN	NaN	NaN	NaN	NaN	NaN
DOVITINIB	SF3B1	NaN	NaN	NaN	NaN	NaN	NaN	NaN	NaN
DOVITINIB	SP140	NaN	NaN	NaN	NaN	NaN	NaN	NaN	NaN
DOVITINIB	TCL1A	NaN	NaN	NaN	NaN	NaN	NaN	NaN	NaN
DOVITINIB	TET2	NaN	NaN	NaN	NaN	NaN	NaN	NaN	NaN
DOVITINIB	TGDS	NaN	NaN	NaN	NaN	NaN	NaN	NaN	NaN
DOVITINIB	TP53	NaN	NaN	NaN	NaN	NaN	NaN	NaN	NaN
DOVITINIB	TRAF2	NaN	NaN	NaN	NaN	NaN	NaN	NaN	NaN
DOVITINIB	TRAF3	NaN	NaN	NaN	NaN	NaN	NaN	NaN	NaN
DOVITINIB	UBR5	NaN	NaN	NaN	NaN	NaN	NaN	NaN	NaN
DOVITINIB	XBP1	NaN	NaN	NaN	NaN	NaN	NaN	NaN	NaN
DOVITINIB	ZFP36L1	NaN	NaN	NaN	NaN	NaN	NaN	NaN	NaN
DOVITINIB	ZNF292	NaN	NaN	NaN	NaN	NaN	NaN	NaN	NaN
DOX	ABCF1	NaN	NaN	NaN	NaN	NaN	NaN	NaN	NaN
DOX	ACTG1	1.66558	0.0145246	2.56484	0.000351105	0.279598	1.07482	0.0135175	0.026684
DOX	ARID1A	0.401224	0.732466	0.597473	0.94111	1.31163	25.6363	1.39357	24.4689
DOX	ARID2	-0.404484	0.698261	-0.861757	0.5644	1.4149	27.9304	1.2782	24.8336
DOX	ATM	0.281249	0.719897	0.544933	0.908864	1.352	26.6362	1.39965	25.4482
DOX	ATRX	0.0158365	0.384154	-0.40658	0.11236	1.47899	22.2809	1.08146	7.86517
DOX	BCL7A	-0.621977	0.450012	-0.116418	0.502988	1.44379	24.3006	1.24936	23.6404
DOX	BHLHE41	NaN	NaN	NaN	NaN	NaN	NaN	NaN	NaN
DOX	BRAF	0.167962	0.470125	-0.150691	0.595285	1.34073	23.9764	1.27325	25.002
DOX	BTG1	-0.455861	0.681212	-1.08512	0.533675	1.45704	28.6109	1.24524	24.0154
DOX	CCND1	0.416669	0.442922	1.37551	0.204629	1.48283	24.3607	1.31304	13.5055
DOX	CDKN1B	NaN	NaN	NaN	NaN	NaN	NaN	NaN	NaN
DOX	CDKN2C	NaN	NaN	NaN	NaN	NaN	NaN	NaN	NaN
DOX	CREBBP	0.0126831	0.032856	-0.397397	0.189369	0.421652	2.36563	1.32558	12.6877
DOX	CYLD	0.185061	0.978007	0.112173	0.666405	1.4482	25.4282	1.35035	26.6562
DOX	DIS3	0.424077	0.270385	1.22356	0.0529219	1.89269	18.1158	0.814997	3.8633
DOX	DNMT3A	NaN	NaN	NaN	NaN	NaN	NaN	NaN	NaN
DOX	DTX1	NaN	NaN	NaN	NaN	NaN	NaN	NaN	NaN
DOX	DUSP2	1.55767	0.0288014	2.27442	0.00561525	0.443541	2.1025	0.144125	0.421144
DOX	EGR1	-0.653888	0.344596	-0.982452	0.361333	1.65837	21.365	1.39113	20.9573
DOX	EP300	2.25752	3.25e-06	1.02364	0.684265	0.000250249	0.000250249	1.35099	26.6863
DOX	FGFR3	-0.707186	0.784877	-0.168326	0.871035	1.37353	26.6858	1.39729	26.1311
DOX	FUBP1	NaN	NaN	NaN	NaN	NaN	NaN	NaN	NaN
DOX	HIST1H1B	NaN	NaN	NaN	NaN	NaN	NaN	NaN	NaN
DOX	HIST1H1D	-0.988957	0.388491	-0.611748	0.469256	1.42447	22.144	1.24595	22.9935
DOX	HIST1H1E	-1.16834	0.360104	-1.80794	0.439015	1.63106	21.9663	1.25201	22.3898
DOX	HIST1H2BK	NaN	NaN	NaN	NaN	NaN	NaN	NaN	NaN
DOX	HUWE1	1.02703	0.307902	0.968179	0.731416	1.82373	20.0136	1.34093	26.331
DOX	IDH1	0.0158365	0.73147	-0.40658	0.893179	1.34103	26.3329	1.40357	25.9022
DOX	IDH2	NaN	NaN	NaN	NaN	NaN	NaN	NaN	NaN
DOX	IGLL5	-0.184064	0.322612	-1.04865	0.155132	1.65607	20.3246	1.19452	10.549
DOX	IRF4	0.312676	0.694365	1.05369	0.697442	1.44503	28.4689	1.30983	25.8054
DOX	KDM5C	NaN	NaN	NaN	NaN	NaN	NaN	NaN	NaN
DOX	KDM6A	-1.08508	0.37928	-2.05751	0.41582	1.62248	22.7568	1.28072	22.0384
DOX	KLHL6	NaN	NaN	NaN	NaN	NaN	NaN	NaN	NaN
DOX	KMT2B	0.351649	0.952095	-0.0958596	0.308542	1.46623	26.6587	1.48486	19.1296
DOX	KMT2C	-0.118644	0.453515	-0.457197	0.437333	1.39683	24.0363	1.29518	22.7413
DOX	KRAS	-0.0743322	0.137432	0.156849	0.494579	1.51175	9.75767	1.26942	23.7398
DOX	LCE1D	NaN	NaN	NaN	NaN	NaN	NaN	NaN	NaN
DOX	LTB	0.870817	0.380995	1.1048	0.583854	1.54403	22.4787	1.28448	25.1057
DOX	MAF	-0.0256486	0.990621	-1.75129	0.225703	1.4392	24.7655	1.15861	14.2193
DOX	MAFB	NaN	NaN	NaN	NaN	NaN	NaN	NaN	NaN
DOX	MAML2	-0.17909	0.593488	-0.345389	0.523606	1.3848	26.7069	1.25993	24.0859
DOX	MAN2C1	0.15946	0.917899	0.912372	0.811869	1.50379	28.4549	1.359	25.9798
DOX	NCOR1	0.234386	0.50764	0.855914	0.342428	1.30294	24.3667	1.38773	20.2032
DOX	NF1	0.00318125	0.440656	0.245481	0.615548	1.5423	24.6768	1.28101	25.2375
DOX	NFKB2	-0.60972	0.501049	-1.49829	0.328287	1.37789	25.0525	1.48695	20.0255
DOX	NFKBIA	-0.0386459	0.812407	0.658203	0.992771	1.39012	26.8094	1.44233	24.8193
DOX	NRAS	0.360854	0.913658	0.77781	0.788648	1.52938	29.2371	1.38013	26.814
DOX	PABPC1	NaN	NaN	NaN	NaN	NaN	NaN	NaN	NaN
DOX	PIK3CA	-0.266538	0.647235	0.528906	0.935326	1.42392	27.8311	1.41216	25.2538
DOX	PIM1	0.348955	0.938223	1.40024	0.396781	1.47435	27.2085	1.32835	21.823
DOX	POT1	-0.0831144	0.504747	0.426354	0.832591	1.34019	24.7326	1.36403	25.8103
DOX	PRDM1	-0.666125	0.299908	-0.46526	0.219083	1.92441	19.7939	1.20496	14.0213
DOX	PRKD2	-1.57553	0.138802	-1.94757	0.213364	1.33597	9.71617	1.26377	13.8687
DOX	PTPN11	-0.276718	0.219838	0.062784	0.0691048	1.88083	15.1688	0.886844	4.97554
DOX	RASA2	-0.913659	0.615441	-1.25805	0.404653	1.39379	27.0794	1.29826	21.8512
DOX	RB1	0.403671	0.971844	1.37551	0.3917	1.46729	26.2398	1.43623	22.3269
DOX	RFTN1	NaN	NaN	NaN	NaN	NaN	NaN	NaN	NaN
DOX	RPL10	-0.518424	0.535691	-0.983154	0.395816	1.33059	25.1775	1.38535	22.1657
DOX	RPL5	NaN	NaN	NaN	NaN	NaN	NaN	NaN	NaN
DOX	RPRD1B	NaN	NaN	NaN	NaN	NaN	NaN	NaN	NaN
DOX	RPS3A	NaN	NaN	NaN	NaN	NaN	NaN	NaN	NaN
DOX	SAMHD1	0.745995	0.546215	1.37551	0.328559	1.31433	25.1259	1.4055	19.7135
DOX	SETD2	NaN	NaN	NaN	NaN	NaN	NaN	NaN	NaN
DOX	SF3B1	NaN	NaN	NaN	NaN	NaN	NaN	NaN	NaN
DOX	SP140	0.442998	0.316692	0.353623	0.0438062	1.7418	20.2683	0.843269	3.24166
DOX	TCL1A	NaN	NaN	NaN	NaN	NaN	NaN	NaN	NaN
DOX	TET2	-0.518638	0.458309	-1.0863	0.733991	1.3573	23.8321	1.31436	25.6897
DOX	TGDS	0.908184	0.00573276	0.544933	0.0882458	0.147141	0.429957	0.970704	6.26545
DOX	TP53	0.186512	0.708435	0.245481	0.806101	1.36374	26.9205	1.37933	26.6013
DOX	TRAF2	0.0607376	0.920176	-0.576186	0.455489	1.47612	27.6053	1.2526	22.7745
DOX	TRAF3	-0.477936	0.266553	-0.702084	0.130172	2.05246	18.1256	1.11369	8.98184
DOX	UBR5	0.291857	0.708373	-0.116418	0.694649	1.39858	27.6266	1.3372	26.3967
DOX	XBP1	NaN	NaN	NaN	NaN	NaN	NaN	NaN	NaN
DOX	ZFP36L1	NaN	NaN	NaN	NaN	NaN	NaN	NaN	NaN
DOX	ZNF292	1.4338	0.000556333	2.25752	5.58e-06	0.0214188	0.0422813	0.000429386	0.000429386
ELEVENOSTAT	ABCF1	NaN	NaN	NaN	NaN	NaN	NaN	NaN	NaN
ELEVENOSTAT	ACTG1	NaN	NaN	NaN	NaN	NaN	NaN	NaN	NaN
ELEVENOSTAT	ARID1A	NaN	NaN	NaN	NaN	NaN	NaN	NaN	NaN
ELEVENOSTAT	ARID2	NaN	NaN	NaN	NaN	NaN	NaN	NaN	NaN
ELEVENOSTAT	ATM	NaN	NaN	NaN	NaN	NaN	NaN	NaN	NaN
ELEVENOSTAT	ATRX	NaN	NaN	NaN	NaN	NaN	NaN	NaN	NaN
ELEVENOSTAT	BCL7A	NaN	NaN	NaN	NaN	NaN	NaN	NaN	NaN
ELEVENOSTAT	BHLHE41	NaN	NaN	NaN	NaN	NaN	NaN	NaN	NaN
ELEVENOSTAT	BRAF	0.107714	0.763776	0.122184	0.684397	3.26726	45.8265	2.77361	40.3794
ELEVENOSTAT	BTG1	NaN	NaN	NaN	NaN	NaN	NaN	NaN	NaN
ELEVENOSTAT	CCND1	NaN	NaN	NaN	NaN	NaN	NaN	NaN	NaN
ELEVENOSTAT	CDKN1B	NaN	NaN	NaN	NaN	NaN	NaN	NaN	NaN
ELEVENOSTAT	CDKN2C	NaN	NaN	NaN	NaN	NaN	NaN	NaN	NaN
ELEVENOSTAT	CREBBP	0.200554	0.687832	-0.518931	0.410796	3.31019	42.6456	2.87558	27.5234
ELEVENOSTAT	CYLD	-0.391637	0.619445	-1.99423	0.155586	3.40695	39.6445	1.71145	11.0466
ELEVENOSTAT	DIS3	0.681081	0.171697	0.763683	0.13896	2.20344	12.3622	2.13998	10.1441
ELEVENOSTAT	DNMT3A	NaN	NaN	NaN	NaN	NaN	NaN	NaN	NaN
ELEVENOSTAT	DTX1	0.0191814	0.999887	0.278642	0.682051	3.07965	52.994	2.91766	40.9231
ELEVENOSTAT	DUSP2	NaN	NaN	NaN	NaN	NaN	NaN	NaN	NaN
ELEVENOSTAT	EGR1	NaN	NaN	NaN	NaN	NaN	NaN	NaN	NaN
ELEVENOSTAT	EP300	NaN	NaN	NaN	NaN	NaN	NaN	NaN	NaN
ELEVENOSTAT	FGFR3	NaN	NaN	NaN	NaN	NaN	NaN	NaN	NaN
ELEVENOSTAT	FUBP1	-0.935061	0.15719	-0.815269	0.240723	4.03454	11.7892	2.05952	16.6099
ELEVENOSTAT	HIST1H1B	NaN	NaN	NaN	NaN	NaN	NaN	NaN	NaN
ELEVENOSTAT	HIST1H1D	NaN	NaN	NaN	NaN	NaN	NaN	NaN	NaN
ELEVENOSTAT	HIST1H1E	-0.0239203	0.929607	-1.64544	0.0615337	2.98249	50.1988	2.36905	4.67656
ELEVENOSTAT	HIST1H2BK	NaN	NaN	NaN	NaN	NaN	NaN	NaN	NaN
ELEVENOSTAT	HUWE1	NaN	NaN	NaN	NaN	NaN	NaN	NaN	NaN
ELEVENOSTAT	IDH1	NaN	NaN	NaN	NaN	NaN	NaN	NaN	NaN
ELEVENOSTAT	IDH2	NaN	NaN	NaN	NaN	NaN	NaN	NaN	NaN
ELEVENOSTAT	IGLL5	0.131724	0.904637	0.0405732	0.868699	3.16623	50.6597	2.67559	46.0411
ELEVENOSTAT	IRF4	-0.216886	0.650404	-0.0722107	0.800033	3.33874	40.9754	2.67837	44.0018
ELEVENOSTAT	KDM5C	NaN	NaN	NaN	NaN	NaN	NaN	NaN	NaN
ELEVENOSTAT	KDM6A	NaN	NaN	NaN	NaN	NaN	NaN	NaN	NaN
ELEVENOSTAT	KLHL6	0.0960373	0.878458	0.254504	0.455031	3.22101	50.0721	2.91978	30.032
ELEVENOSTAT	KMT2B	NaN	NaN	NaN	NaN	NaN	NaN	NaN	NaN
ELEVENOSTAT	KMT2C	0.692308	0.160798	-0.271283	0.57226	3.09535	11.899	2.754	35.4801
ELEVENOSTAT	KRAS	0.180927	0.764826	0.254542	0.461257	3.09956	45.1247	2.73206	29.9817
ELEVENOSTAT	LCE1D	NaN	NaN	NaN	NaN	NaN	NaN	NaN	NaN
ELEVENOSTAT	LTB	0.295762	0.525293	-0.452102	0.463036	3.67705	35.1946	2.5467	29.6343
ELEVENOSTAT	MAF	NaN	NaN	NaN	NaN	NaN	NaN	NaN	NaN
ELEVENOSTAT	MAFB	NaN	NaN	NaN	NaN	NaN	NaN	NaN	NaN
ELEVENOSTAT	MAML2	NaN	NaN	NaN	NaN	NaN	NaN	NaN	NaN
ELEVENOSTAT	MAN2C1	NaN	NaN	NaN	NaN	NaN	NaN	NaN	NaN
ELEVENOSTAT	NCOR1	-1.19363	0.0901028	-1.00178	0.173011	3.46896	6.84782	1.66523	12.1108
ELEVENOSTAT	NF1	NaN	NaN	NaN	NaN	NaN	NaN	NaN	NaN
ELEVENOSTAT	NFKB2	0.690443	0.162579	0.896281	0.0566953	2.50371	11.8683	4.36554	4.36554
ELEVENOSTAT	NFKBIA	NaN	NaN	NaN	NaN	NaN	NaN	NaN	NaN
ELEVENOSTAT	NRAS	-0.466423	0.924711	-0.43113	0.145786	3.09577	50.8591	1.87092	10.4966
ELEVENOSTAT	PABPC1	NaN	NaN	NaN	NaN	NaN	NaN	NaN	NaN
ELEVENOSTAT	PIK3CA	0.492723	0.413024	0.873043	0.0677105	3.53365	28.4987	1.7379	5.07829
ELEVENOSTAT	PIM1	NaN	NaN	NaN	NaN	NaN	NaN	NaN	NaN
ELEVENOSTAT	POT1	NaN	NaN	NaN	NaN	NaN	NaN	NaN	NaN
ELEVENOSTAT	PRDM1	NaN	NaN	NaN	NaN	NaN	NaN	NaN	NaN
ELEVENOSTAT	PRKD2	NaN	NaN	NaN	NaN	NaN	NaN	NaN	NaN
ELEVENOSTAT	PTPN11	-0.292575	0.559134	-0.025112	0.862348	3.58778	36.9028	2.7667	46.5668
ELEVENOSTAT	RASA2	NaN	NaN	NaN	NaN	NaN	NaN	NaN	NaN
ELEVENOSTAT	RB1	NaN	NaN	NaN	NaN	NaN	NaN	NaN	NaN
ELEVENOSTAT	RFTN1	NaN	NaN	NaN	NaN	NaN	NaN	NaN	NaN
ELEVENOSTAT	RPL10	NaN	NaN	NaN	NaN	NaN	NaN	NaN	NaN
ELEVENOSTAT	RPL5	NaN	NaN	NaN	NaN	NaN	NaN	NaN	NaN
ELEVENOSTAT	RPRD1B	NaN	NaN	NaN	NaN	NaN	NaN	NaN	NaN
ELEVENOSTAT	RPS3A	NaN	NaN	NaN	NaN	NaN	NaN	NaN	NaN
ELEVENOSTAT	SAMHD1	NaN	NaN	NaN	NaN	NaN	NaN	NaN	NaN
ELEVENOSTAT	SETD2	-0.949016	0.0580834	-0.861097	0.124579	4.47242	4.47242	2.39815	9.21885
ELEVENOSTAT	SF3B1	-0.239318	0.691805	-0.0866087	0.781601	3.13347	42.2001	2.7356	43.7697
ELEVENOSTAT	SP140	-0.451728	0.401142	-0.293165	0.550814	3.86099	28.0799	2.82751	34.7013
ELEVENOSTAT	TCL1A	NaN	NaN	NaN	NaN	NaN	NaN	NaN	NaN
ELEVENOSTAT	TET2	0.0960373	0.869854	0.254504	0.719914	3.34894	50.4515	2.77167	41.755
ELEVENOSTAT	TGDS	NaN	NaN	NaN	NaN	NaN	NaN	NaN	NaN
ELEVENOSTAT	TP53	-0.399854	0.447772	-0.106024	0.757216	3.44785	30.4485	2.77646	43.1613
ELEVENOSTAT	TRAF2	-0.511161	0.396637	-0.25393	0.614293	4.363	28.1612	2.78239	37.4719
ELEVENOSTAT	TRAF3	-0.391637	0.559201	-0.597669	0.387359	3.31219	36.3481	2.98267	26.3404
ELEVENOSTAT	UBR5	NaN	NaN	NaN	NaN	NaN	NaN	NaN	NaN
ELEVENOSTAT	XBP1	NaN	NaN	NaN	NaN	NaN	NaN	NaN	NaN
ELEVENOSTAT	ZFP36L1	NaN	NaN	NaN	NaN	NaN	NaN	NaN	NaN
ELEVENOSTAT	ZNF292	NaN	NaN	NaN	NaN	NaN	NaN	NaN	NaN
ELOTUZUMAB	ABCF1	NaN	NaN	NaN	NaN	NaN	NaN	NaN	NaN
ELOTUZUMAB	ACTG1	NaN	NaN	NaN	NaN	NaN	NaN	NaN	NaN
ELOTUZUMAB	ARID1A	NaN	NaN	NaN	NaN	NaN	NaN	NaN	NaN
ELOTUZUMAB	ARID2	NaN	NaN	NaN	NaN	NaN	NaN	NaN	NaN
ELOTUZUMAB	ATM	NaN	NaN	NaN	NaN	NaN	NaN	NaN	NaN
ELOTUZUMAB	ATRX	NaN	NaN	NaN	NaN	NaN	NaN	NaN	NaN
ELOTUZUMAB	BCL7A	NaN	NaN	NaN	NaN	NaN	NaN	NaN	NaN
ELOTUZUMAB	BHLHE41	NaN	NaN	NaN	NaN	NaN	NaN	NaN	NaN
ELOTUZUMAB	BRAF	NaN	NaN	NaN	NaN	NaN	NaN	NaN	NaN
ELOTUZUMAB	BTG1	NaN	NaN	NaN	NaN	NaN	NaN	NaN	NaN
ELOTUZUMAB	CCND1	NaN	NaN	NaN	NaN	NaN	NaN	NaN	NaN
ELOTUZUMAB	CDKN1B	NaN	NaN	NaN	NaN	NaN	NaN	NaN	NaN
ELOTUZUMAB	CDKN2C	NaN	NaN	NaN	NaN	NaN	NaN	NaN	NaN
ELOTUZUMAB	CREBBP	NaN	NaN	NaN	NaN	NaN	NaN	NaN	NaN
ELOTUZUMAB	CYLD	NaN	NaN	NaN	NaN	NaN	NaN	NaN	NaN
ELOTUZUMAB	DIS3	NaN	NaN	NaN	NaN	NaN	NaN	NaN	NaN
ELOTUZUMAB	DNMT3A	NaN	NaN	NaN	NaN	NaN	NaN	NaN	NaN
ELOTUZUMAB	DTX1	NaN	NaN	NaN	NaN	NaN	NaN	NaN	NaN
ELOTUZUMAB	DUSP2	NaN	NaN	NaN	NaN	NaN	NaN	NaN	NaN
ELOTUZUMAB	EGR1	NaN	NaN	NaN	NaN	NaN	NaN	NaN	NaN
ELOTUZUMAB	EP300	NaN	NaN	NaN	NaN	NaN	NaN	NaN	NaN
ELOTUZUMAB	FGFR3	NaN	NaN	NaN	NaN	NaN	NaN	NaN	NaN
ELOTUZUMAB	FUBP1	NaN	NaN	NaN	NaN	NaN	NaN	NaN	NaN
ELOTUZUMAB	HIST1H1B	NaN	NaN	NaN	NaN	NaN	NaN	NaN	NaN
ELOTUZUMAB	HIST1H1D	NaN	NaN	NaN	NaN	NaN	NaN	NaN	NaN
ELOTUZUMAB	HIST1H1E	NaN	NaN	NaN	NaN	NaN	NaN	NaN	NaN
ELOTUZUMAB	HIST1H2BK	NaN	NaN	NaN	NaN	NaN	NaN	NaN	NaN
ELOTUZUMAB	HUWE1	NaN	NaN	NaN	NaN	NaN	NaN	NaN	NaN
ELOTUZUMAB	IDH1	NaN	NaN	NaN	NaN	NaN	NaN	NaN	NaN
ELOTUZUMAB	IDH2	NaN	NaN	NaN	NaN	NaN	NaN	NaN	NaN
ELOTUZUMAB	IGLL5	NaN	NaN	NaN	NaN	NaN	NaN	NaN	NaN
ELOTUZUMAB	IRF4	NaN	NaN	NaN	NaN	NaN	NaN	NaN	NaN
ELOTUZUMAB	KDM5C	NaN	NaN	NaN	NaN	NaN	NaN	NaN	NaN
ELOTUZUMAB	KDM6A	NaN	NaN	NaN	NaN	NaN	NaN	NaN	NaN
ELOTUZUMAB	KLHL6	NaN	NaN	NaN	NaN	NaN	NaN	NaN	NaN
ELOTUZUMAB	KMT2B	NaN	NaN	NaN	NaN	NaN	NaN	NaN	NaN
ELOTUZUMAB	KMT2C	NaN	NaN	NaN	NaN	NaN	NaN	NaN	NaN
ELOTUZUMAB	KRAS	NaN	NaN	NaN	NaN	NaN	NaN	NaN	NaN
ELOTUZUMAB	LCE1D	NaN	NaN	NaN	NaN	NaN	NaN	NaN	NaN
ELOTUZUMAB	LTB	NaN	NaN	NaN	NaN	NaN	NaN	NaN	NaN
ELOTUZUMAB	MAF	NaN	NaN	NaN	NaN	NaN	NaN	NaN	NaN
ELOTUZUMAB	MAFB	NaN	NaN	NaN	NaN	NaN	NaN	NaN	NaN
ELOTUZUMAB	MAML2	NaN	NaN	NaN	NaN	NaN	NaN	NaN	NaN
ELOTUZUMAB	MAN2C1	NaN	NaN	NaN	NaN	NaN	NaN	NaN	NaN
ELOTUZUMAB	NCOR1	NaN	NaN	NaN	NaN	NaN	NaN	NaN	NaN
ELOTUZUMAB	NF1	NaN	NaN	NaN	NaN	NaN	NaN	NaN	NaN
ELOTUZUMAB	NFKB2	NaN	NaN	NaN	NaN	NaN	NaN	NaN	NaN
ELOTUZUMAB	NFKBIA	NaN	NaN	NaN	NaN	NaN	NaN	NaN	NaN
ELOTUZUMAB	NRAS	NaN	NaN	NaN	NaN	NaN	NaN	NaN	NaN
ELOTUZUMAB	PABPC1	NaN	NaN	NaN	NaN	NaN	NaN	NaN	NaN
ELOTUZUMAB	PIK3CA	NaN	NaN	NaN	NaN	NaN	NaN	NaN	NaN
ELOTUZUMAB	PIM1	NaN	NaN	NaN	NaN	NaN	NaN	NaN	NaN
ELOTUZUMAB	POT1	NaN	NaN	NaN	NaN	NaN	NaN	NaN	NaN
ELOTUZUMAB	PRDM1	NaN	NaN	NaN	NaN	NaN	NaN	NaN	NaN
ELOTUZUMAB	PRKD2	NaN	NaN	NaN	NaN	NaN	NaN	NaN	NaN
ELOTUZUMAB	PTPN11	NaN	NaN	NaN	NaN	NaN	NaN	NaN	NaN
ELOTUZUMAB	RASA2	NaN	NaN	NaN	NaN	NaN	NaN	NaN	NaN
ELOTUZUMAB	RB1	NaN	NaN	NaN	NaN	NaN	NaN	NaN	NaN
ELOTUZUMAB	RFTN1	NaN	NaN	NaN	NaN	NaN	NaN	NaN	NaN
ELOTUZUMAB	RPL10	NaN	NaN	NaN	NaN	NaN	NaN	NaN	NaN
ELOTUZUMAB	RPL5	NaN	NaN	NaN	NaN	NaN	NaN	NaN	NaN
ELOTUZUMAB	RPRD1B	NaN	NaN	NaN	NaN	NaN	NaN	NaN	NaN
ELOTUZUMAB	RPS3A	NaN	NaN	NaN	NaN	NaN	NaN	NaN	NaN
ELOTUZUMAB	SAMHD1	NaN	NaN	NaN	NaN	NaN	NaN	NaN	NaN
ELOTUZUMAB	SETD2	NaN	NaN	NaN	NaN	NaN	NaN	NaN	NaN
ELOTUZUMAB	SF3B1	NaN	NaN	NaN	NaN	NaN	NaN	NaN	NaN
ELOTUZUMAB	SP140	NaN	NaN	NaN	NaN	NaN	NaN	NaN	NaN
ELOTUZUMAB	TCL1A	NaN	NaN	NaN	NaN	NaN	NaN	NaN	NaN
ELOTUZUMAB	TET2	NaN	NaN	NaN	NaN	NaN	NaN	NaN	NaN
ELOTUZUMAB	TGDS	NaN	NaN	NaN	NaN	NaN	NaN	NaN	NaN
ELOTUZUMAB	TP53	NaN	NaN	NaN	NaN	NaN	NaN	NaN	NaN
ELOTUZUMAB	TRAF2	NaN	NaN	NaN	NaN	NaN	NaN	NaN	NaN
ELOTUZUMAB	TRAF3	NaN	NaN	NaN	NaN	NaN	NaN	NaN	NaN
ELOTUZUMAB	UBR5	NaN	NaN	NaN	NaN	NaN	NaN	NaN	NaN
ELOTUZUMAB	XBP1	NaN	NaN	NaN	NaN	NaN	NaN	NaN	NaN
ELOTUZUMAB	ZFP36L1	NaN	NaN	NaN	NaN	NaN	NaN	NaN	NaN
ELOTUZUMAB	ZNF292	NaN	NaN	NaN	NaN	NaN	NaN	NaN	NaN
EN460	ABCF1	NaN	NaN	NaN	NaN	NaN	NaN	NaN	NaN
EN460	ACTG1	NaN	NaN	NaN	NaN	NaN	NaN	NaN	NaN
EN460	ARID1A	NaN	NaN	NaN	NaN	NaN	NaN	NaN	NaN
EN460	ARID2	NaN	NaN	NaN	NaN	NaN	NaN	NaN	NaN
EN460	ATM	NaN	NaN	NaN	NaN	NaN	NaN	NaN	NaN
EN460	ATRX	NaN	NaN	NaN	NaN	NaN	NaN	NaN	NaN
EN460	BCL7A	NaN	NaN	NaN	NaN	NaN	NaN	NaN	NaN
EN460	BHLHE41	NaN	NaN	NaN	NaN	NaN	NaN	NaN	NaN
EN460	BRAF	NaN	NaN	NaN	NaN	NaN	NaN	NaN	NaN
EN460	BTG1	NaN	NaN	NaN	NaN	NaN	NaN	NaN	NaN
EN460	CCND1	NaN	NaN	NaN	NaN	NaN	NaN	NaN	NaN
EN460	CDKN1B	NaN	NaN	NaN	NaN	NaN	NaN	NaN	NaN
EN460	CDKN2C	NaN	NaN	NaN	NaN	NaN	NaN	NaN	NaN
EN460	CREBBP	NaN	NaN	NaN	NaN	NaN	NaN	NaN	NaN
EN460	CYLD	NaN	NaN	NaN	NaN	NaN	NaN	NaN	NaN
EN460	DIS3	NaN	NaN	NaN	NaN	NaN	NaN	NaN	NaN
EN460	DNMT3A	NaN	NaN	NaN	NaN	NaN	NaN	NaN	NaN
EN460	DTX1	NaN	NaN	NaN	NaN	NaN	NaN	NaN	NaN
EN460	DUSP2	NaN	NaN	NaN	NaN	NaN	NaN	NaN	NaN
EN460	EGR1	NaN	NaN	NaN	NaN	NaN	NaN	NaN	NaN
EN460	EP300	NaN	NaN	NaN	NaN	NaN	NaN	NaN	NaN
EN460	FGFR3	NaN	NaN	NaN	NaN	NaN	NaN	NaN	NaN
EN460	FUBP1	NaN	NaN	NaN	NaN	NaN	NaN	NaN	NaN
EN460	HIST1H1B	NaN	NaN	NaN	NaN	NaN	NaN	NaN	NaN
EN460	HIST1H1D	NaN	NaN	NaN	NaN	NaN	NaN	NaN	NaN
EN460	HIST1H1E	NaN	NaN	NaN	NaN	NaN	NaN	NaN	NaN
EN460	HIST1H2BK	NaN	NaN	NaN	NaN	NaN	NaN	NaN	NaN
EN460	HUWE1	NaN	NaN	NaN	NaN	NaN	NaN	NaN	NaN
EN460	IDH1	NaN	NaN	NaN	NaN	NaN	NaN	NaN	NaN
EN460	IDH2	NaN	NaN	NaN	NaN	NaN	NaN	NaN	NaN
EN460	IGLL5	NaN	NaN	NaN	NaN	NaN	NaN	NaN	NaN
EN460	IRF4	NaN	NaN	NaN	NaN	NaN	NaN	NaN	NaN
EN460	KDM5C	NaN	NaN	NaN	NaN	NaN	NaN	NaN	NaN
EN460	KDM6A	NaN	NaN	NaN	NaN	NaN	NaN	NaN	NaN
EN460	KLHL6	NaN	NaN	NaN	NaN	NaN	NaN	NaN	NaN
EN460	KMT2B	NaN	NaN	NaN	NaN	NaN	NaN	NaN	NaN
EN460	KMT2C	NaN	NaN	NaN	NaN	NaN	NaN	NaN	NaN
EN460	KRAS	NaN	NaN	NaN	NaN	NaN	NaN	NaN	NaN
EN460	LCE1D	NaN	NaN	NaN	NaN	NaN	NaN	NaN	NaN
EN460	LTB	NaN	NaN	NaN	NaN	NaN	NaN	NaN	NaN
EN460	MAF	NaN	NaN	NaN	NaN	NaN	NaN	NaN	NaN
EN460	MAFB	NaN	NaN	NaN	NaN	NaN	NaN	NaN	NaN
EN460	MAML2	NaN	NaN	NaN	NaN	NaN	NaN	NaN	NaN
EN460	MAN2C1	NaN	NaN	NaN	NaN	NaN	NaN	NaN	NaN
EN460	NCOR1	NaN	NaN	NaN	NaN	NaN	NaN	NaN	NaN
EN460	NF1	NaN	NaN	NaN	NaN	NaN	NaN	NaN	NaN
EN460	NFKB2	NaN	NaN	NaN	NaN	NaN	NaN	NaN	NaN
EN460	NFKBIA	NaN	NaN	NaN	NaN	NaN	NaN	NaN	NaN
EN460	NRAS	NaN	NaN	NaN	NaN	NaN	NaN	NaN	NaN
EN460	PABPC1	NaN	NaN	NaN	NaN	NaN	NaN	NaN	NaN
EN460	PIK3CA	NaN	NaN	NaN	NaN	NaN	NaN	NaN	NaN
EN460	PIM1	NaN	NaN	NaN	NaN	NaN	NaN	NaN	NaN
EN460	POT1	NaN	NaN	NaN	NaN	NaN	NaN	NaN	NaN
EN460	PRDM1	NaN	NaN	NaN	NaN	NaN	NaN	NaN	NaN
EN460	PRKD2	NaN	NaN	NaN	NaN	NaN	NaN	NaN	NaN
EN460	PTPN11	NaN	NaN	NaN	NaN	NaN	NaN	NaN	NaN
EN460	RASA2	NaN	NaN	NaN	NaN	NaN	NaN	NaN	NaN
EN460	RB1	NaN	NaN	NaN	NaN	NaN	NaN	NaN	NaN
EN460	RFTN1	NaN	NaN	NaN	NaN	NaN	NaN	NaN	NaN
EN460	RPL10	NaN	NaN	NaN	NaN	NaN	NaN	NaN	NaN
EN460	RPL5	NaN	NaN	NaN	NaN	NaN	NaN	NaN	NaN
EN460	RPRD1B	NaN	NaN	NaN	NaN	NaN	NaN	NaN	NaN
EN460	RPS3A	NaN	NaN	NaN	NaN	NaN	NaN	NaN	NaN
EN460	SAMHD1	NaN	NaN	NaN	NaN	NaN	NaN	NaN	NaN
EN460	SETD2	NaN	NaN	NaN	NaN	NaN	NaN	NaN	NaN
EN460	SF3B1	NaN	NaN	NaN	NaN	NaN	NaN	NaN	NaN
EN460	SP140	NaN	NaN	NaN	NaN	NaN	NaN	NaN	NaN
EN460	TCL1A	NaN	NaN	NaN	NaN	NaN	NaN	NaN	NaN
EN460	TET2	NaN	NaN	NaN	NaN	NaN	NaN	NaN	NaN
EN460	TGDS	NaN	NaN	NaN	NaN	NaN	NaN	NaN	NaN
EN460	TP53	NaN	NaN	NaN	NaN	NaN	NaN	NaN	NaN
EN460	TRAF2	NaN	NaN	NaN	NaN	NaN	NaN	NaN	NaN
EN460	TRAF3	NaN	NaN	NaN	NaN	NaN	NaN	NaN	NaN
EN460	UBR5	NaN	NaN	NaN	NaN	NaN	NaN	NaN	NaN
EN460	XBP1	NaN	NaN	NaN	NaN	NaN	NaN	NaN	NaN
EN460	ZFP36L1	NaN	NaN	NaN	NaN	NaN	NaN	NaN	NaN
EN460	ZNF292	NaN	NaN	NaN	NaN	NaN	NaN	NaN	NaN
F8	ABCF1	NaN	NaN	NaN	NaN	NaN	NaN	NaN	NaN
F8	ACTG1	NaN	NaN	NaN	NaN	NaN	NaN	NaN	NaN
F8	ARID1A	NaN	NaN	NaN	NaN	NaN	NaN	NaN	NaN
F8	ARID2	NaN	NaN	NaN	NaN	NaN	NaN	NaN	NaN
F8	ATM	NaN	NaN	NaN	NaN	NaN	NaN	NaN	NaN
F8	ATRX	NaN	NaN	NaN	NaN	NaN	NaN	NaN	NaN
F8	BCL7A	NaN	NaN	NaN	NaN	NaN	NaN	NaN	NaN
F8	BHLHE41	NaN	NaN	NaN	NaN	NaN	NaN	NaN	NaN
F8	BRAF	NaN	NaN	NaN	NaN	NaN	NaN	NaN	NaN
F8	BTG1	NaN	NaN	NaN	NaN	NaN	NaN	NaN	NaN
F8	CCND1	NaN	NaN	NaN	NaN	NaN	NaN	NaN	NaN
F8	CDKN1B	NaN	NaN	NaN	NaN	NaN	NaN	NaN	NaN
F8	CDKN2C	NaN	NaN	NaN	NaN	NaN	NaN	NaN	NaN
F8	CREBBP	NaN	NaN	NaN	NaN	NaN	NaN	NaN	NaN
F8	CYLD	NaN	NaN	NaN	NaN	NaN	NaN	NaN	NaN
F8	DIS3	-0.0807827	0.950227	-2.68508	0.334251	24.3892	71.267	6.43432	24.7345
F8	DNMT3A	NaN	NaN	NaN	NaN	NaN	NaN	NaN	NaN
F8	DTX1	NaN	NaN	NaN	NaN	NaN	NaN	NaN	NaN
F8	DUSP2	NaN	NaN	NaN	NaN	NaN	NaN	NaN	NaN
F8	EGR1	NaN	NaN	NaN	NaN	NaN	NaN	NaN	NaN
F8	EP300	-0.120219	0.951954	-2.55807	0.154365	18.3251	70.4446	11.8861	11.8861
F8	FGFR3	NaN	NaN	NaN	NaN	NaN	NaN	NaN	NaN
F8	FUBP1	NaN	NaN	NaN	NaN	NaN	NaN	NaN	NaN
F8	HIST1H1B	NaN	NaN	NaN	NaN	NaN	NaN	NaN	NaN
F8	HIST1H1D	NaN	NaN	NaN	NaN	NaN	NaN	NaN	NaN
F8	HIST1H1E	NaN	NaN	NaN	NaN	NaN	NaN	NaN	NaN
F8	HIST1H2BK	NaN	NaN	NaN	NaN	NaN	NaN	NaN	NaN
F8	HUWE1	NaN	NaN	NaN	NaN	NaN	NaN	NaN	NaN
F8	IDH1	NaN	NaN	NaN	NaN	NaN	NaN	NaN	NaN
F8	IDH2	NaN	NaN	NaN	NaN	NaN	NaN	NaN	NaN
F8	IGLL5	NaN	NaN	NaN	NaN	NaN	NaN	NaN	NaN
F8	IRF4	NaN	NaN	NaN	NaN	NaN	NaN	NaN	NaN
F8	KDM5C	NaN	NaN	NaN	NaN	NaN	NaN	NaN	NaN
F8	KDM6A	NaN	NaN	NaN	NaN	NaN	NaN	NaN	NaN
F8	KLHL6	NaN	NaN	NaN	NaN	NaN	NaN	NaN	NaN
F8	KMT2B	NaN	NaN	NaN	NaN	NaN	NaN	NaN	NaN
F8	KMT2C	NaN	NaN	NaN	NaN	NaN	NaN	NaN	NaN
F8	KRAS	-0.0807827	0.729982	1.76732	0.316774	28.1043	55.4786	12.1958	24.0749
F8	LCE1D	NaN	NaN	NaN	NaN	NaN	NaN	NaN	NaN
F8	LTB	NaN	NaN	NaN	NaN	NaN	NaN	NaN	NaN
F8	MAF	NaN	NaN	NaN	NaN	NaN	NaN	NaN	NaN
F8	MAFB	NaN	NaN	NaN	NaN	NaN	NaN	NaN	NaN
F8	MAML2	NaN	NaN	NaN	NaN	NaN	NaN	NaN	NaN
F8	MAN2C1	NaN	NaN	NaN	NaN	NaN	NaN	NaN	NaN
F8	NCOR1	NaN	NaN	NaN	NaN	NaN	NaN	NaN	NaN
F8	NF1	-0.0420321	0.987743	-1.72981	0.450574	15.2112	72.1053	6.93885	32.8919
F8	NFKB2	NaN	NaN	NaN	NaN	NaN	NaN	NaN	NaN
F8	NFKBIA	NaN	NaN	NaN	NaN	NaN	NaN	NaN	NaN
F8	NRAS	NaN	NaN	NaN	NaN	NaN	NaN	NaN	NaN
F8	PABPC1	NaN	NaN	NaN	NaN	NaN	NaN	NaN	NaN
F8	PIK3CA	NaN	NaN	NaN	NaN	NaN	NaN	NaN	NaN
F8	PIM1	NaN	NaN	NaN	NaN	NaN	NaN	NaN	NaN
F8	POT1	NaN	NaN	NaN	NaN	NaN	NaN	NaN	NaN
F8	PRDM1	-1.75132	0.0137465	-2.7711	0.32755	1.05848	1.05848	8.40712	24.5663
F8	PRKD2	NaN	NaN	NaN	NaN	NaN	NaN	NaN	NaN
F8	PTPN11	NaN	NaN	NaN	NaN	NaN	NaN	NaN	NaN
F8	RASA2	NaN	NaN	NaN	NaN	NaN	NaN	NaN	NaN
F8	RB1	NaN	NaN	NaN	NaN	NaN	NaN	NaN	NaN
F8	RFTN1	NaN	NaN	NaN	NaN	NaN	NaN	NaN	NaN
F8	RPL10	NaN	NaN	NaN	NaN	NaN	NaN	NaN	NaN
F8	RPL5	NaN	NaN	NaN	NaN	NaN	NaN	NaN	NaN
F8	RPRD1B	NaN	NaN	NaN	NaN	NaN	NaN	NaN	NaN
F8	RPS3A	NaN	NaN	NaN	NaN	NaN	NaN	NaN	NaN
F8	SAMHD1	NaN	NaN	NaN	NaN	NaN	NaN	NaN	NaN
F8	SETD2	NaN	NaN	NaN	NaN	NaN	NaN	NaN	NaN
F8	SF3B1	NaN	NaN	NaN	NaN	NaN	NaN	NaN	NaN
F8	SP140	NaN	NaN	NaN	NaN	NaN	NaN	NaN	NaN
F8	TCL1A	NaN	NaN	NaN	NaN	NaN	NaN	NaN	NaN
F8	TET2	NaN	NaN	NaN	NaN	NaN	NaN	NaN	NaN
F8	TGDS	NaN	NaN	NaN	NaN	NaN	NaN	NaN	NaN
F8	TP53	NaN	NaN	NaN	NaN	NaN	NaN	NaN	NaN
F8	TRAF2	NaN	NaN	NaN	NaN	NaN	NaN	NaN	NaN
F8	TRAF3	NaN	NaN	NaN	NaN	NaN	NaN	NaN	NaN
F8	UBR5	NaN	NaN	NaN	NaN	NaN	NaN	NaN	NaN
[truncated: 3,391 more rows]
