# Supplementary material for: Functional transcriptomic landscape informs novel therapeutic strategies in multiple myeloma
Source: Research Square preprint supplement (doi:10.21203/rs.3.rs-1723993/v1), 2022-07-06
Supplement: Supplementary file 3 [file f177b6d332308628f1d66b6a.xlsx]

## Sheet: Demo, Cyt, and Mut
EMMA_ID	Disease_Status	Demographics				Overall Survival		Risk		Cytogenetics							Driver Mutations
		Gender	Race	Ethnicity	Age_at_Biopsy	os_days	os_status	ISS	R_ISS	t11_14_	t14_16_	t4_14_	del_1p_	del_13q_	del_17p_	amp_dup_1q21_	ABCF1	ACTG1	ARID1A	ARID2	ATM	ATRX	BCL7A	BHLHE41	BRAF	BTG1	CCND1	CDKN1B	CDKN2C	CREBBP	CYLD	DIS3	DNMT3A	DTX1	DUSP2	EGR1	EP300	FGFR3	FUBP1	HIST1H1B	HIST1H1D	HIST1H1E	HIST1H2BK	HUWE1	IDH1	IDH2	IGLL5	IRF4	KDM5C
Pt10	ERMM	Female	Other	Non-Hispanic	56	223	Dead	2	2	0	0	0	0	1	0	0	0	0	0	0	0	0	0	0	0	0	0	0	0	0	0	0	0	0	0	0	0	0	0	0	0	0	0	0	0	0	0	0	0
Pt100	ERMM	Male	White	Non-Hispanic	62	55	Dead	1	2	0	0	0	0	0	0	1	0	0	0	0	0	0	0	0	0	0	0	0	0	0	0	0	0	0	0	0	0	0	0	0	0	0	0	0	0	0	1	0	0
Pt101	ERMM	Male	White	Non-Hispanic	67	1365	Dead	2	2	0	0	1	0	1	0	1	0	0	0	0	0	0	0	0	0	0	0	0	0	0	0	0	1	0	0	0	0	0	0	0	0	0	1	0	0	0	0	0	0
Pt102	LRMM	Female	White	Non-Hispanic	71	434	Dead	1	1	0	0	0	0	0	0	1	0	0	0	0	0	0	0	0	1	0	0	0	0	1	1	0	0	0	0	0	0	0	0	0	0	0	0	1	0	0	0	0	0
Pt103	NDMM	Male	White	Non-Hispanic	40	1689	Alive	2	2	0	0	0	0	0	0	0	0	0	0	0	0	0	0	0	0	0	0	0	0	0	0	0	0	0	0	0	0	0	0	0	0	0	0	0	0	0	1	0	0
Pt104	LRMM	Female	White	Non-Hispanic	53	169	Dead	3	3	0	0	0	0	0	0	1	0	0	0	0	0	0	0	0	0	0	0	0	0	0	0	0	0	0	0	0	0	0	0	0	0	0	0	0	0	0	0	0	0
Pt105	NDMM	Male	White	Non-Hispanic	63	1322	Alive	1	1	1	0	0	0	0	0	0	0	0	0	0	0	0	0	0	0	0	0	0	0	0	0	0	0	0	0	0	0	0	0	0	0	0	0	1	0	0	0	0	0
Pt106	ERMM	Male	African-American	Non-Hispanic	64	156	Dead	1	NA	0	0	0	0	0	1	1	0	0	0	0	0	0	0	0	0	0	0	0	0	0	0	0	0	0	0	0	0	0	0	0	0	0	0	0	0	0	0	0	0
Pt109	SMM	Female	White	Non-Hispanic	69	223	Dead	NA	NA	0	1	0	0	1	0	1	0	0	0	0	0	0	0	0	1	0	0	0	0	0	0	0	0	0	0	0	0	0	0	0	0	0	0	0	0	0	0	0	0
Pt11	NDMM	Male	White	NA	44	2152	Alive	2	2	0	0	0	0	0	0	0	0	0	0	0	0	0	0	0	0	0	0	0	0	0	0	0	0	1	0	0	1	0	0	0	0	0	0	0	0	0	0	0	0
Pt110	ERMM	Male	White	Non-Hispanic	70	148	Dead	2	2	0	0	0	0	0	0	0	0	0	0	0	0	0	0	0	1	0	0	1	0	0	0	0	0	0	0	0	0	0	0	0	0	0	0	0	0	0	1	0	0
Pt112	LRMM	Male	White	Non-Hispanic	67	62	Dead	2	2	0	0	0	0	0	0	1	NA	NA	NA	NA	NA	NA	NA	NA	NA	NA	NA	NA	NA	NA	NA	NA	NA	NA	NA	NA	NA	NA	NA	NA	NA	NA	NA	NA	NA	NA	NA	NA	NA
Pt113	LRMM	Female	White	Non-Hispanic	52	143	Dead	2	2	0	0	0	0	1	1	0	0	0	0	0	0	0	0	0	0	0	0	0	0	0	0	0	0	0	0	0	1	0	0	0	0	0	0	0	0	0	0	0	0
Pt114	NDMM	Male	White	Non-Hispanic	53	979	Alive	2	2	0	0	0	0	0	0	0	0	0	0	0	0	0	0	0	0	0	0	0	0	0	0	0	0	0	0	0	0	0	0	0	0	0	0	0	0	0	0	1	0
Pt115	NDMM	Male	White	Non-Hispanic	61	417	Dead	1	2	0	0	0	0	1	1	0	0	1	0	0	0	0	0	0	0	0	0	0	0	0	0	0	0	0	0	0	1	0	0	0	0	0	0	0	0	0	1	0	0
Pt118	NDMM	Female	White	Non-Hispanic	68	1405	Alive	1	1	0	0	0	0	0	0	0	0	0	0	1	0	0	0	0	0	0	0	0	0	0	0	0	0	0	0	0	0	0	0	0	0	1	0	0	0	0	0	0	0
Pt119	ERMM	Male	White	Non-Hispanic	68	1078	Dead	3	2	1	0	0	0	0	0	0	0	0	0	0	1	0	0	0	0	0	0	0	0	0	0	0	0	0	0	0	0	0	0	0	0	0	0	0	0	0	0	0	0
Pt12	NDMM	Female	White	Non-Hispanic	65	2142	Alive	1	1	0	0	0	0	1	0	1	0	0	0	0	0	0	0	0	1	0	0	0	0	0	0	0	0	1	0	0	0	0	0	0	0	0	0	0	0	0	0	0	0
Pt120	NDMM	Male	White	Non-Hispanic	59	1146	Dead	3	2	0	0	0	0	1	0	1	0	0	1	0	0	0	0	0	0	0	0	0	0	0	0	0	0	0	0	0	0	0	0	0	0	0	0	0	0	0	0	0	0
Pt121	ERMM	Female	White	Non-Hispanic	60	1408	Dead	1	2	0	1	0	0	0	1	1	0	0	0	0	0	0	0	0	0	0	0	0	0	0	0	0	0	0	0	0	0	0	0	0	0	0	0	0	0	0	0	0	0
Pt122	NDMM	Female	African-American	Non-Hispanic	63	1115	Dead	2	NA	0	0	0	0	0	0	0	0	0	0	0	0	0	1	0	0	0	0	0	0	0	0	0	0	0	0	0	0	0	0	0	0	0	0	0	0	0	0	0	0
Pt126	LRMM	Female	White	Non-Hispanic	65	1373	Alive	1	1	0	0	0	0	0	0	0	0	0	0	0	0	0	0	0	0	0	0	0	0	0	0	0	0	0	0	0	0	0	0	0	0	0	0	0	0	0	0	0	0
Pt127	NDMM	Female	African-American	Non-Hispanic	58	1220	Alive	2	2	0	0	0	0	0	0	0	0	0	0	0	0	0	0	0	0	0	0	0	0	0	0	0	0	1	1	0	0	0	0	0	0	0	0	0	0	0	0	0	0
Pt135	ERMM	Female	White	Non-Hispanic	70	1205	Alive	1	NA	0	0	0	0	0	0	0	0	0	0	0	0	0	0	0	0	0	0	0	0	0	0	0	0	0	0	0	0	1	0	0	0	0	0	0	0	0	0	0	1
Pt140	NDMM	Male	White	Non-Hispanic	68	11	Alive	2	2	1	0	0	0	0	0	0	0	0	0	0	0	0	0	0	0	0	0	0	0	0	0	0	0	0	0	0	0	0	0	0	0	0	0	0	0	0	0	0	0
Pt141	ERMM	Male	White	Non-Hispanic	63	39	Dead	1	2	0	1	0	1	1	1	1	0	0	0	0	0	0	0	0	1	0	0	1	0	0	0	1	0	1	0	0	1	0	0	0	0	0	0	1	0	0	0	0	0
Pt142	NDMM	Male	White	Non-Hispanic	75	829	Alive	2	2	1	0	0	0	0	0	0	0	0	0	0	0	0	0	0	0	0	0	0	0	0	0	1	0	0	0	0	0	0	0	0	0	0	0	0	0	0	0	1	0
Pt143	ERMM	Female	White	Non-Hispanic	66	1301	Alive	1	1	0	0	0	0	1	0	1	0	0	0	0	0	0	0	1	0	0	0	0	0	0	0	0	0	0	0	0	0	0	0	0	0	0	0	1	0	0	0	0	0
Pt144	SMM	Female	White	Non-Hispanic	70	30	Dead	NA	NA	0	1	0	0	1	1	1	0	0	0	0	0	0	0	0	1	0	0	0	0	0	0	0	0	0	0	0	0	0	0	1	0	0	0	0	0	0	0	0	0
Pt145	ERMM	Female	White	Non-Hispanic	55	78	Dead	1	2	0	0	1	0	1	0	1	0	0	0	0	0	0	0	0	0	0	0	0	0	0	0	1	0	0	0	0	0	0	0	0	0	0	0	0	0	0	0	0	0
Pt148	LRMM	Female	White	Non-Hispanic	55	1282	Alive	1	NA	1	0	0	0	0	0	0	0	0	0	0	0	0	0	0	0	0	0	0	0	0	1	1	0	0	0	1	0	0	0	0	0	0	0	0	0	0	1	1	0
Pt149	ERMM	Male	White	Non-Hispanic	59	1150	Alive	3	2	0	0	0	0	0	0	0	0	0	0	0	0	0	0	0	0	0	0	0	0	0	0	0	0	0	0	0	0	0	0	0	0	0	0	0	0	0	0	0	0
Pt15	NDMM	Male	White	Non-Hispanic	75	2071	Alive	2	2	0	0	0	0	0	0	0	0	0	0	0	0	0	0	0	0	0	0	0	0	0	0	0	0	0	0	0	0	0	0	0	0	0	0	0	0	0	1	0	0
Pt152	NDMM	Male	White	Non-Hispanic	69	917	Alive	2	2	0	0	0	0	0	0	0	0	0	0	0	0	0	0	0	1	0	0	0	0	0	0	0	0	0	0	0	0	0	0	0	0	0	0	0	0	0	0	0	0
Pt153	ERMM	Female	African-American	Non-Hispanic	63	132	Dead	2	2	0	0	0	0	0	0	1	0	0	0	1	0	1	0	0	0	0	0	0	0	0	0	0	0	0	0	0	0	0	0	0	0	0	0	0	0	0	0	0	1
Pt154	ERMM	Male	White	Non-Hispanic	60	1222	Alive	2	2	0	0	0	0	0	0	0	0	0	1	0	0	0	0	0	0	0	0	0	0	0	0	0	0	0	0	0	0	0	0	0	0	0	0	0	0	0	0	0	0
Pt156	Amyloidosis	Male	White	Non-Hispanic	60	1147	Alive	1	2	0	0	1	0	1	0	1	0	0	0	0	0	0	0	0	0	0	0	0	0	0	0	0	0	0	0	0	0	0	0	0	0	0	0	0	0	0	0	0	0
Pt158	ERMM	Male	White	Non-Hispanic	77	792	Dead	1	2	1	0	0	0	1	1	1	0	0	0	0	0	0	1	0	1	0	0	1	0	0	0	0	0	0	0	0	0	0	0	0	0	0	0	0	0	0	0	1	0
Pt16	ERMM	Male	White	Non-Hispanic	66	1843	Dead	3	2	0	0	0	0	1	0	0	0	0	0	0	0	0	0	0	0	0	0	0	0	0	0	0	0	0	0	0	0	0	0	0	0	0	0	0	0	0	1	0	0
Pt160	NDMM	Male	White	Non-Hispanic	45	740	Alive	2	2	0	0	1	0	1	0	1	0	0	0	0	0	0	0	0	0	0	0	0	0	0	0	0	0	0	0	0	1	0	0	1	0	0	0	0	0	0	0	0	0
Pt161	NDMM	Male	White	Non-Hispanic	60	832	Alive	NA	NA	1	0	0	0	0	0	0	0	0	0	0	0	0	0	0	0	0	0	0	0	0	0	0	0	0	0	0	0	0	0	0	0	0	0	0	0	0	0	0	0
Pt163	ERMM	Female	White	Non-Hispanic	73	969	Alive	2	2	0	1	0	0	0	0	1	0	0	0	0	0	0	0	0	1	0	0	0	0	0	0	0	0	0	0	0	0	0	0	0	0	0	0	0	0	0	0	0	0
Pt164	LRMM	Male	Other	Hispanic	53	228	Dead	1	NA	0	0	0	0	1	1	1	0	0	0	0	0	1	0	0	0	0	0	0	0	1	0	0	0	0	0	0	0	0	0	0	0	0	0	0	0	0	0	0	0
Pt165	ERMM	Male	White	Non-Hispanic	68	179	Dead	2	2	0	0	0	0	0	1	1	0	0	0	0	0	0	0	0	0	0	0	0	0	0	0	0	0	0	0	0	0	0	0	0	0	0	0	0	0	0	0	0	0
Pt166	LRMM	Female	White	Non-Hispanic	69	108	Dead	1	2	1	0	0	0	1	1	1	0	0	0	0	0	0	0	0	0	0	0	0	0	0	1	0	0	0	0	0	0	0	0	0	0	0	0	0	0	0	0	0	0
Pt167	ERMM	Female	White	Non-Hispanic	71	175	Dead	2	2	1	0	0	0	0	0	1	0	0	0	0	0	0	0	0	0	0	0	0	0	0	0	0	0	0	0	0	0	0	0	0	0	0	0	0	0	0	0	0	0
Pt168	NDMM	Female	White	Non-Hispanic	83	76	Dead	2	2	0	0	0	0	0	0	0	0	0	0	0	0	0	0	0	0	0	0	0	0	0	0	0	0	0	0	0	0	0	0	0	0	0	0	0	0	0	0	0	0
Pt169	ERMM	Female	Other	Non-Hispanic	64	823	Alive	3	2	1	0	0	0	0	0	0	0	0	0	1	0	0	0	0	0	0	0	0	0	0	0	0	0	0	0	0	1	0	0	0	0	0	0	0	0	0	1	0	0
Pt17	ERMM	Male	White	Non-Hispanic	66	1945	Alive	1	NA	0	0	0	0	0	0	0	0	0	0	0	0	0	0	0	0	0	0	0	0	0	0	0	0	0	0	0	0	0	0	0	0	0	0	0	0	0	0	0	0
Pt170	LRMM	Male	White	Non-Hispanic	69	499	Dead	2	2	1	0	0	0	1	0	1	0	0	0	0	0	0	0	0	0	0	1	0	0	0	0	1	0	0	0	0	0	0	0	0	0	0	0	0	0	0	0	0	0
Pt171	ERMM	Male	White	Non-Hispanic	73	1022	Dead	1	NA	0	0	0	0	1	0	1	0	0	0	0	0	0	0	0	0	0	0	0	0	0	0	0	0	0	0	0	0	0	0	0	0	0	0	0	0	0	0	0	0
Pt176	NDMM	Male	White	Non-Hispanic	60	650	Alive	1	1	0	0	0	0	1	0	0	0	0	0	0	1	0	0	0	1	0	0	1	0	0	0	0	0	0	0	0	0	0	0	0	0	0	0	0	0	0	0	0	0
Pt177	ERMM	Female	African-American	Non-Hispanic	65	609	Dead	1	NA	NA	NA	NA	NA	NA	NA	NA	0	0	0	0	0	0	0	0	0	0	0	0	0	0	0	0	0	0	0	0	0	0	0	0	1	0	0	0	0	0	0	0	0
Pt178	LRMM	Female	African-American	Non-Hispanic	49	1071	Alive	1	2	0	0	0	0	1	0	1	0	0	0	0	0	0	0	0	0	0	0	0	0	0	0	0	0	0	0	1	0	0	0	0	0	0	0	0	0	0	0	0	0
Pt179	LRMM	Female	White	Non-Hispanic	61	1084	Dead	1	2	0	1	0	0	1	1	1	0	0	0	0	0	0	0	0	0	0	0	0	0	0	0	0	0	0	0	0	0	0	0	0	0	0	0	0	0	0	0	0	0
Pt18	ERMM	Female	White	Non-Hispanic	77	1676	Dead	1	2	0	0	1	0	1	0	1	0	0	0	0	0	0	0	0	0	0	0	0	0	0	0	1	0	0	0	0	0	1	0	0	0	0	0	0	0	0	0	0	0
Pt180	LRMM	Male	White	Non-Hispanic	67	1069	Alive	1	NA	1	0	0	0	0	0	0	0	0	0	1	0	0	0	0	0	0	0	0	0	0	0	0	0	0	0	0	0	0	0	1	0	0	0	0	0	0	0	0	0
Pt181	LRMM	Male	African-American	Non-Hispanic	64	234	Dead	1	1	0	0	0	1	0	0	1	0	0	1	0	0	0	0	0	0	0	0	0	0	0	0	0	0	0	0	0	0	0	0	0	0	0	0	0	0	0	0	0	0
Pt182	LRMM	Female	White	Non-Hispanic	78	481	Dead	2	2	0	0	0	0	1	0	1	0	0	0	1	1	0	0	0	0	0	0	0	0	0	0	0	0	0	0	0	0	1	0	0	0	0	0	0	0	0	0	0	0
Pt183	LRMM	Female	White	Non-Hispanic	55	90	Dead	1	2	1	0	0	0	1	0	1	0	0	0	1	0	0	0	0	0	1	1	0	0	0	0	1	0	0	0	0	0	0	0	0	0	0	0	0	0	1	1	0	0
Pt184	LRMM	Female	White	Non-Hispanic	61	1067	Dead	1	NA	NA	NA	NA	NA	NA	NA	NA	0	0	0	0	0	0	0	0	0	0	0	0	0	0	1	0	0	0	0	0	0	0	0	0	0	0	0	0	0	0	0	0	0
Pt186	NDMM	Male	White	Non-Hispanic	70	1097	Alive	1	2	1	0	0	0	1	0	0	0	0	0	0	0	0	0	0	0	0	0	0	0	0	0	0	0	1	0	1	0	0	0	0	0	0	0	1	0	1	0	0	0
Pt187	ERMM	Male	White	Non-Hispanic	61	33	Dead	2	2	1	0	0	1	0	0	0	0	0	0	0	0	0	0	0	0	0	1	0	0	0	0	0	0	0	0	0	0	0	0	0	0	0	0	0	0	0	0	0	0
Pt188	ERMM	Male	White	Non-Hispanic	69	1071	Alive	1	NA	0	0	0	0	0	0	0	0	0	0	0	0	0	0	0	0	0	0	0	0	0	0	0	0	0	0	0	0	0	0	0	0	1	0	0	0	0	0	0	0
Pt192	ERMM	Male	White	Non-Hispanic	53	1074	Alive	1	NA	0	0	0	0	0	1	0	0	1	0	0	0	0	0	1	0	0	0	0	0	0	0	0	0	0	0	0	0	0	0	0	0	0	0	0	0	0	0	0	0
Pt193	LRMM	Male	White	Non-Hispanic	58	275	Dead	3	2	0	0	0	0	1	0	1	0	0	1	0	0	0	0	0	0	0	0	0	0	0	0	0	0	0	0	1	0	0	0	0	0	0	0	0	0	0	0	0	0
Pt194	ERMM	Male	White	Non-Hispanic	56	1082	Alive	1	1	0	0	0	0	1	0	0	0	0	0	0	0	0	0	0	0	0	0	0	0	0	0	0	0	0	0	0	0	0	0	0	0	0	0	0	0	0	0	1	0
Pt195	NDMM	Female	White	Non-Hispanic	69	1001	Alive	2	2	1	0	0	0	1	0	0	0	0	0	0	0	0	0	0	0	0	1	0	0	0	0	0	0	0	0	0	0	0	0	0	0	0	0	0	0	0	1	0	0
Pt196	ERMM	Female	White	Non-Hispanic	69	588	Alive	1	2	0	0	0	1	1	1	1	0	0	0	0	0	0	0	0	0	0	0	0	0	0	0	0	0	0	1	1	0	0	0	0	0	0	0	0	0	0	0	0	0
Pt197	ERMM	Female	White	Non-Hispanic	63	703	Alive	1	1	0	0	0	0	1	0	0	0	0	0	0	0	0	0	0	0	0	0	0	0	0	0	0	0	0	0	0	0	0	0	0	0	0	0	0	0	0	0	0	0
Pt198	ERMM	Male	White	Non-Hispanic	75	354	Dead	1	2	0	0	0	0	0	1	0	0	0	0	0	0	0	0	0	0	0	0	0	0	0	0	0	0	0	0	0	0	0	0	0	0	0	0	0	0	0	1	0	0
Pt199	ERMM	Female	White	Non-Hispanic	64	1049	Alive	1	NA	1	0	0	0	1	1	0	0	0	0	0	0	0	0	0	1	0	1	0	0	0	0	0	0	0	0	0	0	0	0	0	0	0	0	0	0	0	0	0	0
Pt200	NDMM	Male	White	Non-Hispanic	73	1047	Alive	3	2	0	0	0	0	0	0	1	0	0	0	0	0	0	0	0	0	0	0	0	0	0	0	1	0	0	0	1	0	0	0	0	0	0	0	0	0	0	1	0	0
Pt201	LRMM	Female	White	Non-Hispanic	55	1041	Alive	1	NA	0	0	0	0	0	0	0	0	0	0	0	0	1	0	0	0	0	1	0	0	0	0	1	0	0	0	1	0	0	0	0	0	0	0	0	1	0	1	1	0
Pt205	ERMM	Female	African-American	Non-Hispanic	49	1033	Alive	1	2	0	0	0	0	0	0	0	0	0	0	0	0	0	0	0	0	0	0	0	0	0	0	0	0	0	0	0	0	0	0	0	0	0	0	0	0	0	0	0	0
Pt206	ERMM	Female	African-American	Non-Hispanic	66	902	Dead	1	2	0	0	0	0	1	1	1	0	0	0	0	0	0	0	0	0	0	0	0	0	0	0	1	0	0	0	0	0	1	0	0	0	0	0	0	0	0	0	0	1
Pt207	NDMM	Female	White	Non-Hispanic	39	1009	Alive	1	2	0	0	0	1	0	1	0	0	0	0	0	0	0	0	0	0	0	0	0	0	0	0	0	0	0	0	0	0	0	0	0	0	0	1	0	0	0	0	0	0
Pt21	ERMM	Male	White	Non-Hispanic	64	327	Dead	1	2	0	0	1	0	1	0	1	0	1	0	0	0	0	0	0	0	0	0	0	0	0	0	1	1	0	0	0	0	0	0	0	0	0	0	0	0	0	0	0	0
Pt210	NDMM	Female	White	Non-Hispanic	43	1014	Alive	2	2	0	0	0	0	0	0	0	0	0	0	0	0	0	0	0	0	0	0	0	0	0	0	0	0	0	0	0	0	0	0	0	0	0	0	0	0	0	0	0	0
Pt211	ERMM	Male	White	Non-Hispanic	80	301	Dead	3	2	0	0	0	0	1	0	0	0	0	0	0	0	0	0	0	0	0	0	0	0	0	0	0	0	0	0	0	0	0	0	0	0	0	0	0	0	0	0	0	0
Pt212	LRMM	Female	Other	Hispanic	70	11	Dead	2	2	0	0	0	0	1	0	1	0	0	0	0	0	0	0	0	0	0	0	0	0	0	1	0	0	0	0	0	0	0	0	0	0	0	0	0	0	0	0	0	1
Pt213	LRMM	Male	White	Non-Hispanic	70	130	Dead	2	2	1	0	0	0	1	1	1	0	0	0	0	0	0	0	0	0	0	0	0	0	0	0	0	0	0	0	0	0	0	0	0	0	0	0	0	0	0	0	0	0
Pt214	NDMM	Male	White	Non-Hispanic	52	987	Alive	1	1	1	0	0	0	1	0	0	0	0	1	0	0	0	0	0	0	0	0	0	0	1	0	1	0	0	0	0	0	0	0	0	0	0	0	0	0	0	0	0	0
Pt216	NDMM	Male	White	Non-Hispanic	68	217	Dead	1	1	1	0	0	0	0	0	0	0	0	0	0	0	0	0	0	0	0	0	0	0	0	0	0	0	0	0	0	1	0	0	0	0	0	0	0	0	0	0	0	0
Pt217	NDMM	Female	White	Non-Hispanic	58	985	Alive	2	2	0	0	0	0	0	0	0	0	0	0	0	0	0	0	0	0	0	0	0	0	0	0	1	0	0	0	0	0	0	0	0	0	0	0	0	0	0	0	0	0
Pt218	LRMM	Male	African-American	Non-Hispanic	64	106	Dead	1	2	0	0	0	1	0	0	1	0	0	0	0	0	0	0	0	0	0	0	0	0	0	0	0	0	0	0	0	0	0	0	0	0	0	0	0	0	0	0	0	0
Pt220	LRMM	Male	White	Non-Hispanic	79	22	Dead	1	2	1	0	0	0	0	1	0	0	0	0	0	0	0	0	0	0	0	0	0	0	0	0	0	0	0	0	0	0	0	0	0	0	0	0	0	0	0	0	0	0
Pt222	ERMM	Female	White	Non-Hispanic	65	931	Alive	1	2	0	0	0	0	0	0	0	0	0	0	0	0	0	0	0	0	0	0	0	0	0	0	0	0	0	0	0	0	0	0	0	0	0	0	0	0	0	0	0	0
Pt223	ERMM	Female	Other	Non-Hispanic	45	734	Alive	1	2	0	0	0	0	1	0	0	0	0	0	0	0	0	0	0	0	0	0	0	0	0	0	0	0	0	0	0	0	0	0	0	0	0	0	0	0	0	0	0	0
Pt224	NDMM	Male	African-American	Non-Hispanic	85	913	Alive	1	2	0	1	0	0	0	0	1	0	0	0	0	0	0	0	0	0	0	0	0	0	1	0	0	0	0	0	0	0	0	0	0	0	0	0	0	0	0	0	0	0
Pt226	ERMM	Female	White	NA	68	902	Alive	1	1	0	0	0	0	0	0	0	NA	NA	NA	NA	NA	NA	NA	NA	NA	NA	NA	NA	NA	NA	NA	NA	NA	NA	NA	NA	NA	NA	NA	NA	NA	NA	NA	NA	NA	NA	NA	NA	NA
Pt227	LRMM	Female	White	Non-Hispanic	71	32	Dead	2	2	0	1	0	0	1	0	1	NA	NA	NA	NA	NA	NA	NA	NA	NA	NA	NA	NA	NA	NA	NA	NA	NA	NA	NA	NA	NA	NA	NA	NA	NA	NA	NA	NA	NA	NA	NA	NA	NA
Pt229	LRMM	Female	White	Non-Hispanic	83	77	Dead	2	2	0	0	0	0	1	0	1	0	0	0	0	0	0	1	0	1	0	0	0	0	0	0	0	0	1	0	0	0	0	0	0	1	0	0	0	0	0	1	0	0
Pt230	LRMM	Female	White	Non-Hispanic	65	874	Alive	1	1	0	0	0	1	1	0	1	0	1	0	0	1	0	0	0	1	0	0	0	0	0	0	0	0	0	0	0	0	0	0	0	0	0	0	0	0	0	0	0	0
Pt235	NDMM	Female	White	Hispanic	65	749	Alive	2	2	0	0	0	0	0	0	0	0	0	0	0	0	0	0	0	0	0	0	0	0	0	0	1	0	0	0	0	0	0	0	0	0	0	0	0	0	0	0	0	0
Pt236	LRMM	Female	African-American	Non-Hispanic	65	744	Dead	1	1	0	0	0	0	1	0	1	0	0	0	0	0	0	0	0	0	0	0	0	0	0	0	0	0	0	0	0	0	0	0	0	0	0	0	0	0	0	0	0	0
Pt237	NDMM	Male	Other	NA	40	678	Dead	2	2	0	0	1	0	1	0	0	0	0	0	0	0	0	0	0	0	0	0	0	0	0	0	0	0	0	0	0	0	0	0	0	0	0	0	0	0	0	0	0	0
Pt239	NDMM	Male	White	Non-Hispanic	58	868	Alive	2	2	1	0	0	0	1	0	0	0	0	0	0	0	0	0	0	1	0	0	0	0	0	0	0	1	0	0	0	1	0	0	0	0	0	0	0	0	0	0	0	0
Pt24	NDMM	Male	White	Hispanic	64	1994	Alive	1	1	0	0	0	0	0	0	0	0	0	0	0	0	0	0	0	0	0	0	0	0	0	0	0	0	0	0	0	0	0	0	0	0	0	0	0	0	0	0	0	0
Pt242	NDMM	Male	White	Non-Hispanic	71	857	Dead	2	NA	0	0	0	0	0	0	1	0	0	0	0	0	0	0	0	0	0	0	0	0	0	0	0	0	0	0	0	0	0	0	0	0	0	0	0	0	0	0	0	0
Pt244	NDMM	Female	White	Non-Hispanic	85	69	Dead	2	2	1	0	0	0	0	0	1	0	0	0	0	0	0	0	0	0	0	0	0	0	1	0	0	0	0	0	0	0	0	0	0	0	0	0	0	0	0	0	0	0
Pt246	NDMM	Male	White	Hispanic	59	832	Alive	2	NA	NA	NA	NA	NA	NA	NA	NA	0	0	0	0	0	0	0	0	0	0	0	0	0	0	0	0	0	0	0	0	0	0	0	0	0	0	0	0	0	0	0	0	0
Pt247	LRMM	Male	White	Non-Hispanic	59	48	Dead	2	NA	0	0	0	0	1	1	1	0	0	0	0	0	0	0	0	0	0	0	0	0	0	1	0	0	0	0	0	0	0	0	0	0	0	0	0	0	0	0	0	0
Pt248	NDMM	Female	African-American	Non-Hispanic	64	832	Alive	1	1	0	0	0	0	0	0	0	0	0	0	0	0	0	0	0	0	0	0	0	0	0	0	0	0	0	0	0	0	0	0	0	0	0	0	0	0	0	0	0	0
Pt249	ERMM	Male	White	Hispanic	65	844	Alive	1	1	0	0	0	0	0	0	0	0	0	0	0	0	0	0	0	0	0	0	0	0	0	0	0	0	0	0	0	0	0	0	0	0	0	0	0	0	0	0	0	0
Pt251	NDMM	Female	White	Non-Hispanic	79	820	Alive	2	NA	1	0	0	0	1	0	0	0	0	0	0	1	0	0	0	1	0	0	0	0	0	0	1	0	0	0	0	0	0	0	0	0	0	0	0	0	0	0	1	0
Pt252	ERMM	Female	White	Non-Hispanic	73	74	Dead	NA	NA	0	0	0	0	0	0	1	0	0	0	0	0	0	0	0	0	0	0	1	0	0	0	0	0	0	0	0	0	0	0	0	0	0	0	0	0	0	0	0	0
Pt253	ERMM	Male	White	Non-Hispanic	60	522	Dead	1	2	0	0	0	0	1	0	1	0	0	0	0	0	0	0	0	0	0	0	0	0	0	0	0	0	0	0	0	0	0	0	0	0	0	0	0	0	0	0	0	0
Pt254	LRMM	Male	White	Non-Hispanic	62	227	Dead	3	3	0	0	1	0	1	0	1	0	0	1	0	0	0	0	0	0	0	0	0	0	0	0	0	0	0	0	0	0	0	0	0	0	1	0	0	0	0	0	0	0
Pt256	SMM	Female	White	Non-Hispanic	82	264	Dead	2	2	0	0	0	0	1	0	0	0	0	0	1	0	0	0	0	0	0	0	0	0	0	0	0	0	0	0	0	0	0	0	0	0	0	0	0	0	0	1	0	0
Pt258	LRMM	Female	White	Non-Hispanic	62	759	Dead	2	2	0	1	0	0	1	1	1	0	0	0	0	0	0	0	0	0	0	0	0	0	0	1	0	0	0	0	0	0	0	0	0	0	0	0	0	0	0	0	0	0
Pt259	ERMM	Female	White	Non-Hispanic	71	139	Dead	1	NA	0	0	0	1	1	0	1	0	0	0	0	0	0	0	0	0	0	0	0	0	0	0	0	0	0	0	0	0	0	0	0	0	0	0	0	0	0	1	0	0
Pt263	ERMM	Female	White	Non-Hispanic	64	702	Alive	1	NA	0	0	0	0	0	0	0	0	0	0	0	0	0	0	0	0	0	0	0	0	0	0	0	0	0	0	0	0	0	0	0	0	0	0	0	0	0	0	0	0
Pt264	LRMM	Female	White	Non-Hispanic	77	228	Dead	1	1	0	0	0	0	0	0	0	0	0	0	0	0	0	0	0	0	0	0	0	0	0	0	1	0	0	0	0	0	0	0	0	0	0	0	0	0	0	0	0	0
Pt265	NDMM	Female	White	Non-Hispanic	48	772	Alive	1	2	0	0	0	1	1	1	0	0	0	0	0	0	0	0	0	0	0	0	0	0	0	0	0	0	0	0	0	0	0	0	0	0	0	0	0	0	0	1	0	0
Pt268	ERMM	Male	White	Hispanic	58	118	Dead	1	2	0	0	1	0	1	0	1	0	0	0	0	0	0	0	1	0	0	0	0	0	0	1	0	0	0	0	0	1	0	0	0	0	0	0	1	0	0	0	0	0
Pt269	NDMM	Female	White	Non-Hispanic	59	757	Alive	2	2	0	0	0	0	1	0	1	0	0	0	0	0	0	0	0	0	0	0	0	0	0	0	0	0	0	0	0	0	0	0	0	0	0	0	0	0	0	0	0	0
Pt271	ERMM	Male	White	Non-Hispanic	54	89	Dead	2	2	0	0	0	0	0	1	1	0	0	0	0	0	0	0	0	0	0	0	0	0	0	0	0	0	0	0	0	0	0	0	0	0	0	0	0	0	0	0	0	0
Pt276	LRMM	Male	White	Non-Hispanic	62	142	Dead	3	3	0	0	1	0	1	0	1	0	0	0	0	0	0	0	0	0	0	0	0	0	0	0	0	0	0	0	0	0	0	0	0	0	1	0	0	0	0	0	0	0
Pt277	NDMM	Female	White	Non-Hispanic	72	713	Alive	1	2	0	0	0	0	0	0	1	0	0	0	0	0	0	0	0	0	0	0	0	0	0	0	1	0	0	0	0	1	0	0	0	0	0	0	0	0	0	0	0	0
Pt278	NDMM	Female	African-American	Non-Hispanic	84	637	Alive	2	2	0	0	0	0	1	0	0	0	0	0	0	0	0	0	0	0	0	0	0	0	0	0	0	0	0	0	0	0	0	0	0	0	0	0	0	0	0	0	0	0
Pt28	ERMM	Female	White	Non-Hispanic	53	1024	Dead	NA	NA	1	0	0	0	1	1	1	0	0	0	1	0	0	0	0	0	1	1	0	0	0	0	1	0	0	0	0	0	0	0	0	0	0	0	0	0	1	1	0	0
Pt280	LRMM	Female	White	Non-Hispanic	66	685	Alive	1	2	0	0	0	1	1	0	1	0	1	0	0	1	0	0	0	1	0	0	0	0	1	0	0	1	0	0	0	0	0	0	0	0	0	0	0	0	0	0	0	0
Pt282	NDMM	Male	White	Non-Hispanic	88	637	Alive	1	2	0	0	0	0	1	1	0	0	0	0	0	0	0	0	0	0	0	0	0	0	0	0	0	0	0	0	0	0	0	0	0	0	0	0	0	0	0	0	0	0
Pt283	LRMM	Female	Other	Non-Hispanic	46	513	Alive	1	NA	0	0	0	0	1	0	1	0	0	0	0	0	0	0	0	0	0	0	0	0	0	0	0	0	0	0	1	0	0	0	0	0	0	0	0	0	0	0	0	0
Pt29	NDMM	Female	White	Non-Hispanic	56	12	Dead	2	2	0	0	0	0	0	0	0	0	0	0	0	1	0	0	0	0	0	0	0	0	0	0	1	0	0	0	1	0	0	0	0	0	0	0	0	0	0	0	1	0
Pt290	NDMM	Male	White	Non-Hispanic	76	686	Alive	2	NA	0	0	0	0	0	0	0	0	0	0	0	0	0	0	0	1	0	0	0	0	0	0	0	0	0	0	0	0	0	0	0	0	0	0	0	0	0	0	0	0
Pt291	LRMM	Male	White	Non-Hispanic	68	698	Alive	1	1	0	0	0	0	1	0	1	0	0	0	0	0	0	0	0	0	0	0	0	0	0	0	0	0	1	0	0	0	0	0	0	0	0	0	0	0	0	0	0	0
Pt293	ERMM	Female	African-American	Non-Hispanic	70	122	Dead	3	3	0	0	0	0	1	1	0	0	0	0	0	0	0	0	0	0	0	0	0	0	1	0	0	0	0	0	0	0	0	0	0	0	0	0	0	0	0	0	0	0
Pt294	ERMM	Male	White	Non-Hispanic	72	189	Dead	1	1	0	0	0	0	0	0	0	0	1	1	0	1	0	0	0	0	0	0	0	0	0	0	0	0	0	0	0	0	0	0	0	0	0	0	0	0	0	0	0	0
Pt297	NDMM	Male	White	Non-Hispanic	54	681	Alive	1	2	1	0	0	0	1	1	0	0	0	0	0	0	0	0	0	0	0	1	0	0	0	0	0	0	0	0	0	0	0	0	0	0	0	0	0	0	0	0	0	0
Pt298	ERMM	Male	White	Non-Hispanic	54	505	Dead	1	2	0	0	1	0	1	1	0	0	0	0	0	0	0	0	0	0	0	0	0	0	0	0	0	0	0	0	1	0	0	0	0	0	0	0	0	0	0	0	0	0
Pt299	NDMM	Female	White	Non-Hispanic	78	375	Alive	1	2	0	0	0	1	0	1	1	0	1	0	0	0	0	0	0	0	1	0	0	0	0	0	1	0	0	0	0	0	0	0	0	0	0	0	0	0	0	1	0	0
Pt30	NDMM	Female	White	Hispanic	62	1583	Alive	3	2	0	0	0	0	0	0	0	0	0	0	0	0	0	0	0	0	0	0	0	0	0	0	0	0	0	0	0	0	0	0	0	0	0	0	0	1	0	0	0	0
Pt300	LRMM	Female	White	Non-Hispanic	70	385	Dead	2	NA	NA	NA	NA	NA	NA	NA	NA	0	0	0	0	0	0	0	0	0	0	0	0	0	0	0	0	1	0	0	0	0	0	0	0	0	0	0	0	0	0	0	0	0
Pt301	ERMM	Female	White	Non-Hispanic	71	664	Alive	2	2	1	0	0	0	1	0	0	0	0	0	0	0	0	0	0	0	0	0	0	0	0	0	0	1	0	0	0	0	0	0	0	0	0	0	0	0	0	0	0	0
Pt303	LRMM	Male	White	Non-Hispanic	63	80	Dead	2	2	0	0	1	0	1	0	1	0	0	0	0	0	0	0	0	0	0	0	0	0	0	0	0	0	0	0	0	0	0	0	0	0	1	0	0	0	0	0	0	0
Pt304	LRMM	Male	White	Non-Hispanic	50	185	Alive	1	1	0	0	0	0	1	0	1	0	0	1	0	0	0	0	0	0	0	0	0	0	0	0	0	0	0	0	0	0	0	0	0	0	0	0	0	0	0	0	0	0
Pt309	NDMM	Male	White	Non-Hispanic	64	648	Alive	2	2	1	0	0	0	1	0	0	0	0	1	0	0	0	0	0	0	0	0	0	0	0	0	0	0	0	0	0	0	0	0	0	0	0	0	0	0	0	0	0	0
Pt31	LRMM	Male	African-American	Non-Hispanic	59	377	Dead	2	2	0	0	0	0	1	1	1	0	0	0	0	1	0	0	0	0	0	0	0	0	0	0	0	0	0	0	0	0	0	0	0	0	0	0	0	0	0	1	0	0
Pt312	LRMM	Male	White	Non-Hispanic	64	649	Alive	1	2	0	0	1	0	1	0	1	0	0	0	0	0	0	0	0	0	0	0	0	0	0	0	0	0	0	0	0	0	0	0	0	0	0	0	0	0	0	0	0	0
Pt313	NDMM	Male	White	Non-Hispanic	86	181	Alive	1	2	0	0	0	0	1	1	0	0	0	1	0	0	0	1	0	0	0	0	0	0	0	0	0	0	0	0	0	0	0	0	0	0	1	0	0	0	0	0	0	0
Pt325	LRMM	Male	White	Non-Hispanic	79	14	Dead	NA	NA	0	0	0	0	0	1	1	0	0	0	0	0	0	0	0	0	0	0	0	0	0	0	0	0	0	0	0	0	0	0	0	0	0	0	0	0	0	1	0	0
Pt33	LRMM	Female	White	Non-Hispanic	70	745	Dead	1	NA	NA	NA	NA	NA	NA	NA	NA	0	0	0	0	0	0	1	0	1	0	0	0	0	0	1	0	0	0	0	0	0	0	0	0	0	0	0	0	0	0	0	0	0
Pt34	ERMM	Male	White	Non-Hispanic	67	1724	Dead	1	1	0	0	0	0	1	0	0	0	0	0	0	0	1	0	0	0	0	0	0	0	0	0	0	0	0	0	0	0	0	0	0	0	0	0	0	0	0	1	0	0
Pt348	NDMM	Male	White	Non-Hispanic	64	498	Alive	1	1	1	0	0	0	1	0	0	0	1	0	0	0	0	0	0	0	0	0	0	0	0	0	0	0	0	0	0	0	0	0	0	0	0	0	0	0	0	0	0	0
Pt36	LRMM	Female	White	Non-Hispanic	52	493	Dead	2	2	0	0	0	0	0	0	0	0	0	0	0	0	0	0	0	0	0	0	0	0	0	0	0	0	0	0	0	0	0	0	0	0	0	0	0	0	0	0	0	0
Pt37	LRMM	Male	White	Non-Hispanic	68	1173	Dead	1	1	0	0	0	0	0	0	0	0	0	0	0	0	0	0	0	0	0	0	0	0	0	0	0	0	0	0	0	0	0	0	0	0	0	0	0	0	0	0	0	0
Pt373	ERMM	Female	White	Non-Hispanic	68	285	Alive	1	NA	1	0	0	0	0	0	0	1	0	0	1	0	0	1	0	0	0	0	0	0	0	0	1	0	0	0	0	0	0	0	0	1	1	1	0	0	0	1	0	0
Pt375	LRMM	Male	White	Non-Hispanic	63	425	Alive	2	2	0	0	0	0	0	0	0	0	0	0	0	0	0	0	0	0	0	0	0	0	0	0	0	0	0	0	0	0	0	0	0	0	0	0	0	0	0	0	0	0
Pt379	ERMM	Male	White	Non-Hispanic	70	335	Alive	1	NA	NA	NA	NA	NA	NA	NA	NA	NA	NA	NA	NA	NA	NA	NA	NA	NA	NA	NA	NA	NA	NA	NA	NA	NA	NA	NA	NA	NA	NA	NA	NA	NA	NA	NA	NA	NA	NA	NA	NA	NA
Pt38	ERMM	Female	White	Non-Hispanic	60	1795	Alive	1	2	0	1	0	0	1	0	1	0	0	0	0	0	0	0	0	0	0	0	0	0	0	0	0	0	0	0	1	0	0	0	0	0	0	0	0	0	0	0	0	0
Pt380	ERMM	Female	White	Non-Hispanic	43	386	Alive	1	1	0	0	0	0	1	0	1	NA	NA	NA	NA	NA	NA	NA	NA	NA	NA	NA	NA	NA	NA	NA	NA	NA	NA	NA	NA	NA	NA	NA	NA	NA	NA	NA	NA	NA	NA	NA	NA	NA
Pt382	ERMM	Female	White	Non-Hispanic	71	147	Alive	1	NA	0	0	0	0	0	0	1	0	0	0	0	0	0	0	0	0	0	0	0	0	1	0	0	0	0	0	0	0	0	0	0	0	0	0	0	0	0	0	0	0
Pt386	NDMM	Female	White	Non-Hispanic	78	307	Alive	2	2	0	0	0	0	1	0	1	0	0	0	0	0	0	0	0	0	0	0	0	0	0	1	0	0	0	0	1	0	0	0	0	0	0	0	0	0	0	1	0	0
Pt387	NDMM	Male	White	Non-Hispanic	46	350	Alive	3	3	0	0	0	0	1	1	1	0	0	0	0	1	0	1	0	0	0	0	0	0	0	0	0	0	1	0	0	0	0	0	0	0	0	0	0	0	0	0	0	0
Pt388	ERMM	Male	White	Hispanic	51	439	Alive	1	2	1	0	0	0	0	0	0	0	0	0	0	0	0	1	0	0	0	0	0	0	0	0	0	0	0	0	0	0	0	0	0	0	0	0	0	0	0	0	1	0
Pt389	ERMM	Female	White	Hispanic	44	197	Alive	1	2	0	0	1	1	1	0	1	0	0	0	0	0	0	1	0	0	0	0	0	0	0	0	0	0	0	0	0	0	0	0	0	0	0	0	0	0	0	0	0	0
Pt39	LRMM	Female	White	Non-Hispanic	52	472	Dead	2	NA	NA	NA	NA	NA	NA	NA	NA	0	0	0	0	0	0	0	0	0	0	0	0	0	0	0	0	0	0	0	0	0	0	0	0	0	0	0	0	0	0	0	0	0
Pt390	LRMM	Male	White	Non-Hispanic	64	419	Alive	2	2	0	0	1	0	1	0	1	0	0	0	0	0	0	0	0	0	0	0	0	0	0	0	0	0	0	0	0	0	0	0	0	0	0	0	0	0	0	0	0	0
Pt392	ERMM	Male	Other	Hispanic	56	404	Alive	1	NA	0	0	0	0	0	0	1	0	0	0	0	0	0	0	0	0	0	0	0	0	0	0	0	0	0	0	0	0	0	0	1	0	0	0	0	0	0	0	0	0
Pt393	NDMM	Female	White	Non-Hispanic	61	206	Alive	1	1	0	0	0	0	1	0	1	0	0	0	0	0	0	0	0	0	0	0	1	0	0	0	0	0	0	0	0	0	0	0	0	0	0	0	0	0	0	1	0	0
Pt394	NDMM	Male	White	Non-Hispanic	72	318	Alive	1	1	0	0	0	0	0	0	0	0	0	1	1	0	0	0	0	0	0	0	0	0	0	0	0	0	0	0	0	0	0	0	0	0	0	0	0	0	0	0	0	0
Pt397	ERMM	Male	White	Non-Hispanic	71	396	Alive	1	2	1	0	0	0	1	1	1	0	0	0	0	1	0	1	0	0	0	0	0	0	0	0	0	0	0	0	0	0	0	0	0	0	0	0	1	0	0	1	0	0
Pt398	NDMM	Female	White	Non-Hispanic	70	388	Alive	2	2	0	0	0	0	1	0	0	0	0	0	0	0	0	1	0	0	1	0	0	0	0	0	0	0	0	0	0	0	0	0	0	0	0	0	0	0	0	0	0	0
Pt400	ERMM	Male	White	Non-Hispanic	65	391	Alive	3	2	1	0	0	0	1	0	0	0	0	0	0	0	0	0	0	0	0	0	0	0	0	0	0	0	0	0	0	0	0	0	0	0	0	0	0	0	0	0	0	0
Pt401	NDMM	Male	African-American	Non-Hispanic	61	384	Alive	1	2	0	1	0	0	1	0	1	0	0	0	0	0	0	0	0	1	0	0	0	0	0	0	0	0	0	0	0	0	0	1	0	0	0	0	0	0	0	0	0	0
Pt403	ERMM	Female	White	Non-Hispanic	55	364	Alive	1	NA	NA	NA	NA	NA	NA	NA	NA	0	0	0	0	0	0	0	0	0	0	0	0	0	0	0	0	0	0	0	0	0	0	0	0	0	1	0	0	0	0	0	0	0
Pt404	ERMM	Male	White	Non-Hispanic	69	188	Alive	1	NA	0	0	1	0	1	1	1	0	0	0	0	0	0	0	0	0	0	0	0	0	1	1	0	0	0	0	0	0	0	0	0	1	0	0	0	0	0	0	0	0
Pt408	ERMM	Male	White	Non-Hispanic	67	41	Dead	3	2	0	0	0	0	0	0	0	0	0	0	0	0	0	1	0	0	0	0	0	0	0	0	0	1	0	0	0	0	0	0	0	0	0	0	0	0	0	0	0	0
Pt409	SMM	Male	White	Non-Hispanic	71	315	Alive	NA	NA	0	0	0	0	1	0	0	0	0	0	0	0	0	0	0	0	0	0	0	0	0	0	0	0	0	0	0	0	0	0	0	0	0	0	0	0	0	0	0	0
Pt411	ERMM	Male	African-American	Non-Hispanic	66	283	Alive	1	1	0	0	0	0	0	0	1	0	0	0	0	0	0	0	0	1	0	0	0	0	0	0	0	0	0	0	0	1	0	0	0	0	0	0	0	0	0	0	0	0
Pt42	LRMM	Male	White	Non-Hispanic	69	1145	Dead	2	NA	NA	NA	NA	NA	NA	NA	NA	0	0	0	0	0	0	0	0	0	0	0	0	0	0	0	0	0	0	0	0	0	0	0	0	0	0	0	0	0	0	0	0	0
Pt46	LRMM	Female	White	Non-Hispanic	72	430	Dead	3	3	0	0	0	0	1	1	1	0	0	0	0	0	0	0	0	0	0	0	0	0	0	1	0	0	0	0	1	0	0	0	0	0	0	0	0	0	0	0	0	0
Pt47	ERMM	Male	White	Non-Hispanic	67	1766	Alive	1	NA	0	0	0	0	0	0	0	0	0	0	1	0	1	0	0	0	0	0	0	0	0	0	0	0	0	0	0	0	0	0	0	0	0	0	0	0	0	0	0	0
Pt52	LRMM	Female	White	Non-Hispanic	59	169	Dead	2	2	1	0	0	0	1	0	1	0	0	0	0	1	0	0	0	0	0	0	0	0	0	0	0	0	0	0	0	0	0	1	0	0	0	0	0	0	0	0	0	0
Pt53	LRMM	Male	White	Non-Hispanic	53	215	Dead	2	2	0	0	1	0	1	1	0	0	0	0	0	0	0	0	0	0	0	1	0	0	0	0	0	0	0	0	0	1	0	0	0	0	0	0	0	0	0	1	0	0
Pt55	LRMM	Male	White	Non-Hispanic	72	89	Dead	2	2	0	0	0	0	1	0	1	0	1	0	0	0	0	0	0	0	0	0	0	0	0	0	1	0	0	1	0	0	0	1	0	0	0	0	0	0	0	0	0	0
Pt56	ERMM	Male	White	Non-Hispanic	65	996	Dead	1	1	0	0	0	0	1	0	0	0	0	0	0	1	0	0	0	0	0	1	0	0	0	0	0	0	0	0	0	0	0	0	0	0	0	0	0	0	0	0	0	0
Pt57	LRMM	Female	Other	Hispanic	50	277	Dead	2	2	1	0	0	0	0	0	0	0	0	0	0	0	0	0	0	0	0	1	0	0	0	0	1	0	0	0	0	0	0	0	0	0	0	0	0	1	0	0	1	0
Pt59	LRMM	Male	White	Non-Hispanic	76	1132	Dead	2	2	0	0	0	0	0	0	1	0	0	0	0	0	0	0	0	0	0	0	0	0	0	0	1	0	0	0	0	0	0	0	0	0	0	1	0	0	0	0	0	0
Pt6	LRMM	Male	White	Non-Hispanic	68	60	Dead	2	2	0	0	0	0	0	0	1	0	0	0	0	0	0	0	0	0	0	0	0	0	0	0	0	0	0	0	0	0	0	1	0	0	0	0	0	0	0	0	0	0
Pt60	SMM	Male	White	Non-Hispanic	86	201	Dead	NA	NA	1	0	0	0	1	0	0	0	0	0	0	0	0	0	0	0	0	0	0	0	0	0	0	0	0	0	0	0	0	0	0	0	0	0	0	0	0	0	0	0
Pt63	ERMM	Male	White	Non-Hispanic	82	1044	Dead	1	2	1	0	0	0	0	0	0	0	0	0	0	0	0	0	0	1	0	1	0	0	0	0	0	0	0	0	1	0	1	0	0	0	0	0	0	0	0	0	0	0
Pt64	ERMM	Male	White	Non-Hispanic	76	1299	Dead	NA	NA	0	0	0	0	0	0	0	0	0	0	0	0	0	0	0	0	0	1	0	0	0	0	0	0	0	0	0	1	0	0	0	0	0	0	0	0	0	0	0	0
Pt65	LRMM	Male	African-American	Non-Hispanic	59	219	Dead	2	2	0	0	0	0	1	1	1	0	0	0	0	1	1	0	0	0	0	0	0	0	0	0	0	0	0	0	0	0	0	0	0	0	0	0	0	0	0	1	0	0
Pt68	LRMM	Male	White	Non-Hispanic	53	169	Dead	2	2	0	0	1	0	1	1	0	0	0	1	0	0	0	0	0	0	0	1	0	0	0	0	0	0	0	0	0	1	0	0	0	0	0	1	0	0	0	1	0	0
Pt7	LRMM	Male	White	Non-Hispanic	75	255	Dead	1	1	1	0	0	0	0	0	1	0	0	0	0	1	0	0	0	0	0	0	0	0	0	0	0	0	0	0	0	1	0	0	0	0	0	0	0	1	0	0	1	0
Pt71	LRMM	Male	White	Non-Hispanic	76	1106	Dead	1	1	0	0	0	0	0	0	1	0	0	0	0	1	0	0	0	0	0	0	0	0	0	0	1	0	0	0	0	0	0	0	0	0	0	0	0	0	0	0	0	0
Pt73	NDMM	Female	White	Non-Hispanic	65	58	Dead	2	2	1	0	0	0	1	0	0	0	0	1	0	0	0	0	0	0	0	0	0	0	0	0	0	0	0	0	0	0	0	0	0	0	0	0	0	0	0	0	0	0
Pt74	ERMM	Male	White	Non-Hispanic	63	324	Dead	1	2	0	0	1	0	1	0	1	0	0	0	0	0	0	0	0	0	0	0	0	0	0	0	0	0	0	0	0	0	0	0	0	0	0	0	0	0	0	0	0	0
Pt75	ERMM	Male	White	Non-Hispanic	51	1727	Alive	1	1	1	0	0	0	0	0	0	0	0	0	0	0	0	0	1	0	0	0	0	0	0	0	1	0	0	0	0	0	0	0	0	0	0	0	0	0	0	0	0	0
Pt78	LRMM	Female	White	Non-Hispanic	70	557	Dead	3	2	0	0	0	0	0	0	1	0	0	0	0	0	0	0	0	1	0	0	0	0	0	1	0	0	0	0	0	0	0	0	0	0	0	0	0	0	0	0	0	0
Pt79	ERMM	Female	White	Non-Hispanic	65	61	Dead	2	2	0	0	0	0	0	0	0	0	0	0	0	0	1	0	0	0	0	0	0	0	0	1	1	0	0	0	0	1	0	0	0	0	0	0	0	0	0	0	0	0
Pt87	LRMM	Male	White	Non-Hispanic	76	1614	Alive	2	2	0	0	0	0	0	0	1	0	0	0	0	0	0	0	0	0	0	0	0	0	0	0	0	0	0	0	1	0	0	0	0	0	0	0	0	0	0	0	0	0
Pt95	LRMM	Female	African-American	Non-Hispanic	56	1748	Alive	2	2	0	0	0	0	0	0	1	0	0	0	0	0	0	0	0	0	0	0	0	0	0	0	0	0	0	0	0	0	0	0	0	0	0	0	0	0	0	0	0	0
Pt97	ERMM	Male	White	Non-Hispanic	67	1569	Alive	1	1	0	0	0	0	0	0	0	0	0	0	0	0	0	0	0	0	0	0	0	0	0	0	0	0	0	0	0	0	0	0	0	0	0	0	0	0	0	0	0	0
Pt98	NDMM	Female	White	Non-Hispanic	66	1729	Alive	1	1	0	0	0	0	1	0	0	0	0	0	0	0	0	0	0	0	0	0	0	0	0	0	0	0	0	0	1	0	0	0	0	0	0	0	0	0	0	0	0	0
Pt99	LRMM	Female	African-American	Non-Hispanic	56	1722	Alive	1	1	0	0	0	0	0	0	1	0	0	0	0	0	0	0	0	0	0	0	0	0	0	0	0	0	0	0	0	0	0	0	0	0	0	0	0	0	0	0	0	0
[truncated: 44 more columns]

## Sheet: LD50 & AUC
EMMA_ID	DrugName	LD50@96h (M)	LD20@96h (M)	AUC@96h (%)	Maximum Concentration (M)
Pt10	BTZ	2.75e-09	2.0933e-09	32.0983	5e-08
Pt10	DEX	6.79e-08	2.71756e-08	55.4042	1e-05
Pt10	LEN	No LD50	1.80484e-07	74.507	1e-05
Pt10	MEL	1.48e-05	1.51739e-06	37.493	5e-05
Pt100	ALI	No LD50	No LD50	91.5175	1e-05
Pt100	BI2536	3.38e-06	2.65102e-07	55.1059	1e-05
Pt100	BTZ	4.05e-10	1.62035e-10	25.1943	5e-08
Pt100	CFZ	3.33e-10	1.33203e-10	27.2898	5e-08
Pt100	CRIZ	3.02e-06	2.04633e-06	56.8692	1e-05
Pt100	DABRA	No LD50	No LD50	91.6306	1e-05
Pt100	DOX	2.78e-07	4.67838e-08	30.8836	5e-06
Pt100	INK128	1.64e-07	4.15057e-08	63.1879	1e-05
Pt100	MEL	6.61e-06	3.7657e-06	41.1063	5e-05
Pt100	MK2206	3.21e-07	4.96104e-08	53.6893	1e-05
Pt100	MOTE	No LD50	No LD50	100	1e-05
Pt100	PALB	5.18e-06	3.90194e-06	76.4454	1e-05
Pt100	PANO	2.18e-09	3.40892e-10	42.8955	5e-08
Pt100	PONA	3.21e-06	5.65454e-07	41.9734	1e-05
Pt100	RUXO	No LD50	8.96126e-08	86.7947	1e-05
Pt101	ALI	No LD50	No LD50	93.0339	1e-05
Pt101	BI2536	3.86e-06	5.92424e-07	63.3973	1e-05
Pt101	BTZ	3.71e-10	1.48511e-10	51.0514	5e-08
Pt101	CFZ	1.47e-08	4.95647e-09	68.6858	5e-08
Pt101	CRIZ	5.5e-06	9.5594e-07	75.8037	1e-05
Pt101	DABRA	No LD50	No LD50	96.5455	1e-05
Pt101	DOX	5.26e-07	1.43909e-07	61.469	5e-06
Pt101	INK128	5.71e-06	6.98085e-08	74.7264	1e-05
Pt101	MEL	7.74e-06	7.62935e-07	64.6885	5e-05
Pt101	MK2206	9.92e-06	8.30559e-08	78.0393	1e-05
Pt101	MOTE	No LD50	2.84643e-06	91.5803	1e-05
Pt101	PALB	No LD50	4.93208e-06	89.0723	1e-05
Pt101	PANO	1.53e-09	3.14475e-10	70.2221	5e-08
Pt101	PONA	3.62e-06	1.52322e-06	64.1715	1e-05
Pt101	RUXO	No LD50	2.29592e-07	83.1602	1e-05
Pt102	ALI	No LD50	No LD50	97.8202	1e-05
Pt102	BI2536	4.38e-06	3.31234e-06	68.5325	1e-05
Pt102	BTZ	2.17e-09	2.94011e-10	68.1231	5e-08
Pt102	CFZ	6.35e-09	1.42586e-09	67.4555	5e-08
Pt102	CRIZ	4.84e-06	3.49721e-06	73.0878	1e-05
Pt102	DABRA	No LD50	No LD50	96.4197	1e-05
Pt102	DOX	5.89e-07	2.52275e-07	58.4577	5e-06
Pt102	INK128	9.96e-06	8.87906e-08	78.4354	1e-05
Pt102	MEL	1.87e-05	7.17866e-07	57.8702	5e-05
Pt102	MK2206	9.44e-06	9.20492e-06	88.1501	1e-05
Pt102	MOTE	No LD50	No LD50	97.9931	1e-05
Pt102	PALB	6.21e-06	3.95751e-06	81.5758	1e-05
Pt102	PANO	1.01e-08	4.70473e-09	68.065	5e-08
Pt102	PONA	3.36e-06	8.25514e-07	53.1837	1e-05
Pt102	RUXO	No LD50	No LD50	93.2809	1e-05
Pt103	ALI	No LD50	No LD50	98.762	1e-05
Pt103	BI2536	4.08e-06	3.48748e-06	65.2727	1e-05
Pt103	BTZ	7.46e-09	1.47297e-09	67.154	5e-08
Pt103	CFZ	2.51e-08	5.08477e-09	76.3077	5e-08
Pt103	CRIZ	4.54e-06	7.1452e-07	66.0733	1e-05
Pt103	DABRA	No LD50	No LD50	95.7214	1e-05
Pt103	DOX	9.86e-07	3.52366e-07	67.8882	5e-06
Pt103	INK128	No LD50	8.38981e-08	78.1654	1e-05
Pt103	MEL	No LD50	2.31308e-05	83.128	5e-05
Pt103	MK2206	4.13e-06	1.8699e-07	66.6247	1e-05
Pt103	MOTE	No LD50	No LD50	95.0047	1e-05
Pt103	PALB	5.49e-06	3.65008e-06	77.4777	1e-05
Pt103	PANO	3.93e-08	1.45093e-08	91.9169	5e-08
Pt103	PONA	3.42e-06	3.53814e-07	53.8577	1e-05
Pt103	RUXO	No LD50	No LD50	96.9569	1e-05
Pt104	ALI	No LD50	5.37688e-06	94.2415	1e-05
Pt104	BI2536	3.88e-06	3.15695e-06	67.569	1e-05
Pt104	BTZ	4.26e-09	2.32605e-09	53.6145	5e-08
Pt104	CFZ	9.52e-09	5.24752e-09	60.0216	5e-08
Pt104	CRIZ	3.98e-06	8.57896e-08	72.3514	1e-05
Pt104	DABRA	No LD50	No LD50	100	1e-05
Pt104	DOX	5.99e-07	4.46356e-07	45.1613	5e-06
Pt104	INK128	No LD50	7.2919e-08	73.8084	1e-05
Pt104	MEL	6.77e-06	1.34917e-06	38.23	5e-05
Pt104	MK2206	9.9e-06	6.82168e-07	85.4357	1e-05
Pt104	MOTE	No LD50	No LD50	100	1e-05
Pt104	PALB	5.61e-06	4.07558e-06	81.2635	1e-05
Pt104	PANO	4.91e-09	6.82884e-10	64.2886	5e-08
Pt104	PONA	1.54e-06	4.19454e-07	51.3394	1e-05
Pt104	RUXO	No LD50	2.54932e-07	84.576	1e-05
Pt105	BTZ	4.34e-08	2.36112e-09	72.1689	5e-08
Pt105	CFZ	4.89e-08	3.54681e-08	81.0253	5e-08
Pt105	DEFA	5.07e-06	1.24847e-06	57.6672	2e-05
Pt105	DEX	7.11e-06	5.37706e-08	65.4673	1e-05
Pt105	DOX	1.97e-07	3.96667e-08	45.2781	5e-06
Pt105	LEN	No LD50	9.75595e-06	91.5012	1e-05
Pt105	MEL	6.25e-06	2.02587e-07	40.2851	5e-05
Pt105	PANO	No LD50	3.35758e-08	95.7884	5e-08
Pt105	POM	No LD50	3.22157e-06	87.9482	1e-05
Pt106	BTZ	3.09e-10	1.23615e-10	28.8955	5e-08
Pt106	CFZ	4.81e-10	1.92372e-10	21.4559	5e-08
Pt106	DEFA	4.35e-06	1.63723e-07	45.592	2e-05
Pt106	DEX	No LD50	9.69237e-08	74.9099	1e-05
Pt106	DOX	4.95e-08	1.98126e-08	29.7861	5e-06
Pt106	LEN	1.24e-06	5.53902e-08	68.7758	1e-05
Pt106	PANO	4.19e-10	1.67631e-10	39.337	5e-08
Pt106	POM	1.69e-06	4.72166e-08	66.7883	1e-05
Pt109	ASO_PYK2	No LD50	No LD50	100	1e-05
Pt109	ASO_STAT3	No LD50	No LD50	100	1e-05
Pt109	BTZ	4.62e-09	2.14484e-09	53.7598	5e-08
Pt109	CFZ	2.17e-09	3.88839e-10	51.342	5e-08
Pt109	DEFA	5.79e-06	2.6388e-06	61.8807	2e-05
Pt109	DEX	No LD50	7.21556e-08	81.2129	1e-05
Pt109	DOX	2.21e-07	1.252e-07	43.3026	5e-06
Pt109	IXA	2.5e-08	4.70517e-09	72.6184	5e-08
Pt109	LEN	No LD50	No LD50	97.7647	1e-05
Pt109	MEL	4.97e-07	1.9884e-07	18.6159	5e-05
Pt109	PANO	4.1e-08	1.87687e-08	91.1978	5e-08
Pt109	POM	No LD50	9.26342e-06	95.2521	1e-05
Pt11	BTZ	2.31e-09	7.50688e-10	44.2765	5e-08
Pt11	DEX	No LD50	7.54315e-08	87.0033	1e-05
Pt11	LEN	No LD50	No LD50	91.5986	1e-05
Pt11	MEL	2.51e-06	7.2314e-07	36.2256	5e-05
Pt110	ASO_PYK2	No LD50	7.51465e-06	95.7282	1e-05
Pt110	ASO_STAT3	No LD50	6.94017e-06	90.2939	1e-05
Pt110	BTZ	3.91e-10	1.56245e-10	53.9278	5e-08
Pt110	CFZ	3.44e-09	2.02675e-09	60.7545	5e-08
Pt110	DEFA	6.72e-06	3.05517e-06	61.9094	2e-05
Pt110	DEX	No LD50	9.30345e-08	86.8563	1e-05
Pt110	DOX	6.65e-08	2.06643e-08	52.03	5e-06
Pt110	IXA	1.86e-08	1.40892e-08	68.2468	5e-08
Pt110	LEN	No LD50	2.03541e-06	87.5843	1e-05
Pt110	MEL	7.38e-07	2.52809e-07	46.5407	5e-05
Pt110	PANO	1.46e-08	1.21014e-09	70.9113	5e-08
Pt110	POM	No LD50	2.60698e-07	86.9163	1e-05
Pt111	ASO_PYK2	No LD50	No LD50	96.3574	1e-05
Pt111	ASO_STAT3	No LD50	No LD50	97.8109	1e-05
Pt111	BTZ	5.7e-10	2.1465e-10	36.1054	5e-08
Pt111	DEFA	7.21e-06	2.53206e-06	55.1223	2e-05
Pt111	DEX	No LD50	7.36375e-08	79.2995	1e-05
Pt111	DOX	4.31e-08	1.72407e-08	36.4883	5e-06
Pt111	IXA	No LD50	4.69037e-08	98.9149	5e-08
Pt111	LEN	No LD50	No LD50	99.9372	1e-05
Pt111	MEL	3.39e-07	1.35473e-07	19.609	5e-05
Pt111	PANO	1.92e-08	7.08532e-09	73.9275	5e-08
Pt111	POM	No LD50	9.95368e-06	99.9517	1e-05
Pt112	ASO_PYK2	No LD50	No LD50	100	1e-05
Pt112	ASO_STAT3	No LD50	No LD50	92.694	1e-05
Pt112	BTZ	4.28e-10	1.71399e-10	67.0005	5e-08
Pt112	CFZ	1.07e-08	1.09261e-09	65.6508	5e-08
Pt112	DEFA	4.14e-06	2.05874e-06	60.0985	2e-05
Pt112	DEX	No LD50	No LD50	91.1749	1e-05
Pt112	DOX	4.13e-06	1.82743e-07	67.7286	5e-06
Pt112	IXA	No LD50	1.95089e-08	85.4189	5e-08
Pt112	LEN	No LD50	5.15583e-06	90.6892	1e-05
Pt112	MEL	9.13e-06	2.7501e-07	36.0308	5e-05
Pt112	PANO	1.09e-08	4.031e-10	60.4044	5e-08
Pt112	POM	No LD50	3.26175e-06	88.6234	1e-05
Pt113	ASO_PYK2	No LD50	No LD50	100	1e-05
Pt113	ASO_STAT3	No LD50	No LD50	100	1e-05
Pt113	BTZ	9.46e-10	6.04141e-10	27.8028	5e-08
Pt113	CFZ	2.85e-09	1.58023e-09	34.4438	5e-08
Pt113	DEFA	6.95e-06	3.66295e-06	53.3561	2e-05
Pt113	DEX	No LD50	4.67208e-07	86.1572	1e-05
Pt113	DOX	1.28e-07	5.24143e-08	35.4798	5e-06
Pt113	IXA	4.28e-08	2.90851e-08	85.1473	5e-08
Pt113	LEN	No LD50	No LD50	100	1e-05
Pt113	MEL	3.56e-07	1.42328e-07	16.0867	5e-05
Pt113	PANO	2.48e-08	9.10129e-09	80.5552	5e-08
Pt113	POM	No LD50	9.97247e-06	97.4335	1e-05
Pt114	ASO_PYK2	No LD50	No LD50	99.175	1e-05
Pt114	ASO_STAT3	No LD50	No LD50	94.77	1e-05
Pt114	BTZ	4.24e-10	1.69692e-10	48.124	5e-08
Pt114	CFZ	3.22e-09	6.49159e-10	54.9078	5e-08
Pt114	DEFA	7.46e-06	4.4816e-06	69.4982	2e-05
Pt114	DEX	No LD50	6.45112e-06	84.602	1e-05
Pt114	DOX	5.38e-07	1.84066e-07	54.8362	5e-06
Pt114	IXA	2.4e-08	8.37261e-09	72.1742	5e-08
Pt114	LEN	No LD50	No LD50	95.8022	1e-05
Pt114	MEL	2.43e-06	5.85987e-07	25.3792	5e-05
Pt114	PANO	3.46e-08	2.15297e-08	83.0665	5e-08
Pt114	POM	No LD50	No LD50	99.9946	1e-05
Pt115	ASO_PYK2	No LD50	No LD50	98.5664	1e-05
Pt115	ASO_STAT3	No LD50	No LD50	99.7977	1e-05
Pt115	BTZ	9.09e-10	5.56566e-10	50.7183	5e-08
Pt115	CFZ	5.45e-09	2.27711e-09	64.7865	5e-08
Pt115	DEFA	1.99e-05	5.38629e-06	84.219	2e-05
Pt115	DEX	No LD50	No LD50	90.0985	1e-05
Pt115	DOX	6.26e-07	4.05946e-07	51.024	5e-06
Pt115	IXA	4.98e-08	2.75103e-08	91.9756	5e-08
Pt115	LEN	No LD50	No LD50	100	1e-05
Pt115	MEL	8.02e-07	2.09893e-07	25.041	5e-05
Pt115	PANO	3.06e-08	1.51079e-08	86.6264	5e-08
Pt115	POM	No LD50	No LD50	100	1e-05
Pt118	ASO_PYK2	No LD50	No LD50	96.5258	1e-05
Pt118	ASO_STAT3	No LD50	No LD50	98.7194	1e-05
Pt118	BTZ	2.44e-08	7.41497e-10	73.7357	5e-08
Pt118	CFZ	2.5e-08	2.64832e-09	71.3675	5e-08
Pt118	DEFA	4.72e-06	1.95945e-06	65.9087	2e-05
Pt118	DEX	No LD50	2.52232e-07	84.0733	1e-05
Pt118	DOX	7.91e-07	3.70531e-07	63.335	5e-06
Pt118	IXA	No LD50	No LD50	93.497	5e-08
Pt118	LEN	No LD50	No LD50	91.1142	1e-05
Pt118	MEL	2.71e-06	3.09952e-07	28.828	5e-05
Pt118	PANO	2.16e-08	3.74936e-09	75.5339	5e-08
Pt118	POM	No LD50	No LD50	95.5012	1e-05
Pt119	ASO_PYK2	No LD50	No LD50	100	1e-05
Pt119	ASO_STAT3	No LD50	No LD50	100	1e-05
Pt119	BTZ	1.3e-09	4.54809e-10	52.7057	5e-08
Pt119	CFZ	9.78e-09	2.67828e-09	68.762	5e-08
Pt119	DEFA	4.61e-06	1.92953e-06	62.4636	2e-05
Pt119	DEX	No LD50	6.05568e-08	82.9674	1e-05
Pt119	DOX	6.48e-07	4.02236e-07	59.5377	5e-06
Pt119	IXA	2.57e-08	3.75185e-10	73.2931	5e-08
Pt119	LEN	No LD50	No LD50	99.9619	1e-05
Pt119	MEL	2.9e-06	1.35093e-06	42.2365	5e-05
Pt119	PANO	8.74e-09	1.68127e-09	72.1224	5e-08
Pt119	POM	No LD50	No LD50	96.0056	1e-05
Pt12	DEX	No LD50	8.17449e-08	75.6307	1e-05
Pt12	LEN	No LD50	No LD50	100	1e-05
Pt12	MEL	2.99e-05	1.31998e-05	72.22	5e-05
Pt120	ASO_PYK2	No LD50	No LD50	93.5704	1e-05
Pt120	ASO_STAT3	No LD50	No LD50	94.5384	1e-05
Pt120	BTZ	3.7e-09	1.03973e-09	65.2537	5e-08
Pt120	CFZ	1.38e-08	4.45238e-09	75.2159	5e-08
Pt120	DEFA	9.69e-06	4.26619e-06	70.0114	2e-05
Pt120	DEX	No LD50	No LD50	90.288	1e-05
Pt120	DOX	9.09e-07	1.4884e-07	53.7444	5e-06
Pt120	IXA	No LD50	2.15371e-08	89.432	5e-08
Pt120	LEN	No LD50	No LD50	88.8016	1e-05
Pt120	MEL	3.96e-07	1.58534e-07	22.7242	5e-05
Pt120	PANO	3.32e-08	7.51147e-09	82.3193	5e-08
Pt120	POM	No LD50	9.79831e-08	85.2276	1e-05
Pt121	ASO_PYK2	No LD50	No LD50	94.1508	1e-05
Pt121	ASO_STAT3	No LD50	No LD50	90.4879	1e-05
Pt121	BTZ	2.37e-09	3.62566e-10	60.5371	5e-08
Pt121	CFZ	1.56e-08	2.84545e-09	65.9385	5e-08
Pt121	DEFA	6.66e-06	2.9999e-06	59.601	2e-05
Pt121	DEX	No LD50	5.36965e-08	81.6074	1e-05
Pt121	DOX	2.87e-07	2.76301e-08	45.2619	5e-06
Pt121	IXA	2.18e-08	6.22218e-09	69.0649	5e-08
Pt121	LEN	3.21e-06	6.3417e-08	81.4567	1e-05
Pt121	MEL	3.15e-07	1.26061e-07	23.6621	5e-05
Pt121	PANO	1.52e-08	2.60289e-09	63.7434	5e-08
Pt121	POM	2.39e-06	4.72783e-08	72.6645	1e-05
Pt122	ASO_PYK2	No LD50	No LD50	98.6604	1e-05
Pt122	ASO_STAT3	No LD50	No LD50	96.7798	1e-05
Pt122	BTZ	3.15e-10	1.4747e-08	35.6764	5e-08
Pt122	CFZ	9.62e-10	3.17004e-10	38.1783	5e-08
Pt122	DEFA	3.4e-06	1.81408e-06	63.0054	2e-05
Pt122	DEX	No LD50	6.81805e-08	78.5823	1e-05
Pt122	DOX	2.95e-07	2.12352e-07	49.0465	5e-06
Pt122	IXA	5.27e-09	2.29755e-09	53.0898	5e-08
Pt122	LEN	No LD50	4.87033e-06	95.5599	1e-05
Pt122	MEL	3.63e-07	1.45372e-07	17.9162	5e-05
Pt122	PANO	7.67e-09	4.69132e-09	69.8818	5e-08
Pt122	POM	No LD50	4.27381e-06	94.8854	1e-05
Pt126	ASO_PYK2	No LD50	No LD50	99.9877	1e-05
Pt126	ASO_STAT3	No LD50	No LD50	96.4293	1e-05
Pt126	BTZ	3.85e-10	1.54153e-10	43.5744	5e-08
Pt126	CFZ	3.28e-09	1.03314e-09	56.3608	5e-08
Pt126	DEFA	3.58e-06	2.2906e-06	55.7706	2e-05
Pt126	DEX	No LD50	7.98487e-06	91.3031	1e-05
Pt126	DOX	3.15e-07	1.64315e-07	47.4265	5e-06
Pt126	IXA	No LD50	2.99741e-08	95.935	5e-08
Pt126	LEN	No LD50	No LD50	99.9835	1e-05
Pt126	MEL	3.51e-06	3.21948e-07	28.483	5e-05
Pt126	PANO	3.49e-08	1.62082e-08	90.4565	5e-08
Pt126	POM	No LD50	No LD50	92.8366	1e-05
Pt127	VEN	4.2e-06	6.46565e-08	60.1969	1e-05
Pt127	ASO_PYK2	No LD50	No LD50	96.2585	1e-05
Pt127	ASO_STAT3	No LD50	No LD50	100	1e-05
Pt127	BTZ	5.85e-09	9.74594e-10	61.7473	5e-08
Pt127	CFZ	2.11e-08	2.01491e-09	67.8679	5e-08
Pt127	DEFA	1.13e-05	5.41093e-06	72.7181	2e-05
Pt127	DEX	No LD50	4.71414e-08	76.0312	1e-05
Pt127	DOX	4.73e-07	1.37415e-07	49.5714	5e-06
Pt127	IXA	4.8e-08	4.58952e-08	87.318	5e-08
Pt127	LEN	No LD50	8.12302e-08	87.2645	1e-05
Pt127	MEL	3.24e-06	3.51934e-07	27.4516	5e-05
Pt127	PANO	1.72e-08	3.25987e-09	74.1201	5e-08
Pt127	POM	No LD50	1.67694e-07	88.1155	1e-05
Pt127	RICO	8.63e-06	2.8583e-07	78.1169	1e-05
Pt13	BTZ	1.22e-09	2.35272e-10	45.5988	5e-08
Pt13	DEX	5.02e-06	6.42676e-08	42.4775	1e-05
Pt13	MEL	1.8e-05	9.65856e-07	67.1164	5e-05
Pt135	VEN	No LD50	No LD50	99.4581	1e-05
Pt135	ASO_PYK2	No LD50	No LD50	100	1e-05
Pt135	ASO_STAT3	No LD50	No LD50	100	1e-05
Pt135	BTZ	4.65e-09	1.79055e-09	56.3292	5e-08
Pt135	CFZ	4.51e-08	5.43425e-09	75.6248	5e-08
Pt135	DEFA	3.03e-06	2.11703e-06	49.206	2e-05
Pt135	DEX	No LD50	7.44625e-08	86.0004	1e-05
Pt135	DOX	2.76e-07	1.43923e-07	42.2516	5e-06
Pt135	IXA	No LD50	No LD50	99.9763	5e-08
Pt135	LEN	No LD50	No LD50	100	1e-05
Pt135	MEL	3.01e-06	2.25203e-06	21.6326	5e-05
Pt135	PANO	No LD50	1.87832e-08	88.7885	5e-08
Pt135	POM	No LD50	No LD50	100	1e-05
Pt135	RICO	No LD50	2.3531e-06	89.839	1e-05
Pt14	BTZ	1.29e-09	5.33737e-10	34.2249	5e-08
Pt14	DEX	No LD50	6.41036e-08	69.6157	1e-05
Pt14	LEN	No LD50	No LD50	92.67	1e-05
Pt14	MEL	2.5e-05	1.87455e-05	76.1427	5e-05
Pt140	VEN	No LD50	4.2468e-06	91.759	1e-05
Pt140	ASO_PYK2	No LD50	No LD50	100	1e-05
Pt140	ASO_STAT3	No LD50	No LD50	100	1e-05
Pt140	BTZ	8.06e-10	2.53402e-10	44.5809	5e-08
Pt140	CFZ	7.4e-09	2.79973e-09	59.0244	5e-08
Pt140	DEFA	2.59e-06	2.21508e-06	44.0878	2e-05
Pt140	DEX	7.74e-06	6.94273e-08	75.4151	1e-05
Pt140	DOX	1.76e-07	8.48481e-08	37.2942	5e-06
Pt140	IXA	3.62e-08	2.65554e-08	86.2759	5e-08
Pt140	LEN	No LD50	4.36824e-06	91.8596	1e-05
Pt140	MEL	6.89e-07	2.01124e-07	19.9634	5e-05
Pt140	PANO	1.64e-08	6.94104e-09	68.5742	5e-08
Pt140	POM	No LD50	5.92129e-06	94.4596	1e-05
Pt140	RICO	4.91e-06	1.38429e-06	74.2417	1e-05
Pt141	VEN	No LD50	No LD50	94.9164	1e-05
Pt141	ASO_PYK2	No LD50	No LD50	100	1e-05
Pt141	ASO_STAT3	No LD50	No LD50	95.0551	1e-05
Pt141	BTZ	2.2e-09	1.27425e-09	39.1192	5e-08
Pt141	CFZ	1.93e-08	6.76741e-09	62.3012	5e-08
Pt141	DEFA	7.32e-06	3.47517e-06	55.8288	2e-05
Pt141	DEX	No LD50	6.84816e-08	84.738	1e-05
Pt141	DOX	1e-06	4.88076e-08	46.0134	5e-06
Pt141	IXA	No LD50	3.92431e-08	94.8732	5e-08
Pt141	LEN	No LD50	No LD50	100	1e-05
Pt141	MEL	3.52e-07	1.40629e-07	20.7781	5e-05
Pt141	PANO	1.78e-08	7.68276e-10	73.8537	5e-08
Pt141	POM	No LD50	No LD50	94.0976	1e-05
Pt141	RICO	No LD50	3.38783e-06	86.1623	1e-05
Pt142	VEN	No LD50	3.72417e-06	79.7843	1e-05
Pt142	ASO_PYK2	No LD50	No LD50	100	1e-05
Pt142	ASO_STAT3	No LD50	No LD50	100	1e-05
Pt142	BTZ	1e-08	3.84778e-09	66.2554	5e-08
Pt142	CFZ	2.8e-08	1.45039e-08	77.2633	5e-08
Pt142	DEFA	8.69e-06	3.13375e-06	64.3949	2e-05
Pt142	DEX	No LD50	No LD50	92.939	1e-05
Pt142	DOX	5.44e-07	3.37671e-07	48.9046	5e-06
Pt142	IXA	No LD50	No LD50	100	5e-08
Pt142	LEN	No LD50	No LD50	100	1e-05
Pt142	MEL	5.88e-06	3.12682e-07	27.4211	5e-05
Pt142	PANO	4.99e-08	4.96794e-08	99.7978	5e-08
Pt142	POM	No LD50	No LD50	100	1e-05
Pt142	RICO	8.33e-06	3.33084e-06	99.7729	1e-05
Pt143	VEN	No LD50	3.98631e-06	88.8158	1e-05
Pt143	ASO_PYK2	No LD50	No LD50	95.9366	1e-05
Pt143	ASO_STAT3	No LD50	No LD50	100	1e-05
Pt143	BTZ	2.64e-08	5.86315e-09	68.8049	5e-08
Pt143	CFZ	No LD50	3.22095e-08	88.0187	5e-08
Pt143	DEFA	7.92e-06	6.48643e-06	64.0663	2e-05
Pt143	DEX	4.36e-06	4.87166e-08	69.0339	1e-05
Pt143	DOX	8.32e-07	5.72693e-07	51.7546	5e-06
Pt143	IXA	No LD50	No LD50	96.3398	5e-08
Pt143	LEN	No LD50	No LD50	96.2011	1e-05
Pt143	MEL	6.91e-06	5.73669e-06	33.0019	5e-05
Pt143	PANO	No LD50	1.86116e-08	88.284	5e-08
Pt143	POM	No LD50	No LD50	95.7473	1e-05
Pt143	RICO	No LD50	3.51487e-06	89.9272	1e-05
Pt144	VEN	No LD50	No LD50	95.4208	1e-05
Pt144	ASO_PYK2	No LD50	No LD50	100	1e-05
Pt144	ASO_STAT3	No LD50	No LD50	97.7914	1e-05
Pt144	BTZ	6.39e-10	2.48581e-10	37.6673	5e-08
Pt144	CFZ	2.02e-09	7.16908e-10	45.6832	5e-08
Pt144	DEFA	7.49e-06	5.14741e-06	67.2671	2e-05
Pt144	DEX	6.45e-06	6.02102e-08	84.1342	1e-05
Pt144	DOX	2.04e-07	4.66966e-08	36.0191	5e-06
Pt144	IXA	3.52e-08	2.10056e-08	85.381	5e-08
Pt144	LEN	No LD50	No LD50	97.9919	1e-05
Pt144	MEL	3.14e-07	1.2544e-07	20.7967	5e-05
Pt144	PANO	4.68e-08	3.31215e-08	95.8852	5e-08
Pt144	POM	No LD50	No LD50	95.1416	1e-05
Pt144	RICO	No LD50	No LD50	99.8879	1e-05
Pt145	VEN	No LD50	No LD50	100	1e-05
Pt145	ASO_PYK2	No LD50	No LD50	100	1e-05
Pt145	ASO_STAT3	No LD50	No LD50	100	1e-05
Pt145	BTZ	4.68e-09	2.30719e-09	53.2931	5e-08
Pt145	DEFA	7.71e-06	6.93568e-06	67.8039	2e-05
Pt145	DEX	No LD50	No LD50	100	1e-05
Pt145	DOX	1.81e-06	1.66206e-06	67.187	5e-06
Pt145	IXA	No LD50	No LD50	100	5e-08
Pt145	LEN	No LD50	No LD50	100	1e-05
Pt145	MEL	6.4e-06	7.13372e-07	34.7561	5e-05
Pt145	PANO	No LD50	3.59018e-08	99.9548	5e-08
Pt145	POM	No LD50	No LD50	100	1e-05
Pt145	RICO	No LD50	No LD50	99.9928	1e-05
Pt148	VEN	No LD50	7.99642e-06	92.9629	1e-05
Pt148	ASO_PYK2	No LD50	No LD50	100	1e-05
Pt148	ASO_STAT3	No LD50	No LD50	99.9812	1e-05
Pt148	BTZ	2.8e-08	2.9093e-09	69.6456	5e-08
Pt148	CFZ	4.9e-08	7.36952e-09	76.8119	5e-08
Pt148	DEFA	8.73e-06	1.55245e-06	65.247	2e-05
Pt148	DEX	No LD50	2.46468e-06	86.3368	1e-05
Pt148	DOX	8.57e-07	6.13502e-08	53.2183	5e-06
Pt148	IXA	No LD50	No LD50	90.6302	5e-08
Pt148	LEN	No LD50	6.85467e-06	87.6709	1e-05
Pt148	MEL	1.2e-05	3.47974e-07	33.1924	5e-05
Pt148	PANO	No LD50	2.32343e-08	88.5373	5e-08
Pt148	POM	No LD50	No LD50	90.6204	1e-05
Pt148	RICO	No LD50	3.62561e-06	84.1322	1e-05
Pt149	VEN	No LD50	No LD50	91.4469	1e-05
Pt149	BTZ	2.41e-08	5.1108e-09	68.3092	5e-08
Pt149	CFZ	2.08e-08	5.3408e-09	65.4947	5e-08
Pt149	DEFA	No LD50	7.70639e-07	74.0615	2e-05
Pt149	DEX	No LD50	7.02713e-08	72.676	1e-05
Pt149	DOX	2.39e-06	5.97467e-07	67.1177	5e-06
Pt149	IXA	No LD50	2.75878e-08	91.5573	5e-08
Pt149	LEN	No LD50	6.61654e-06	90.5586	1e-05
Pt149	MEL	4.96e-05	8.40442e-06	75.1104	5e-05
Pt149	PANO	No LD50	7.34149e-09	79.9097	5e-08
Pt149	POM	No LD50	No LD50	98.172	1e-05
Pt15	BTZ	1.34e-09	7.00469e-10	35.4257	5e-08
Pt15	DEX	No LD50	7.96466e-08	86.9338	1e-05
Pt15	LEN	No LD50	4.01976e-06	88.1184	1e-05
Pt15	MEL	1.94e-05	8.21455e-06	78.1242	5e-05
Pt152	VEN	No LD50	5.07471e-06	92.1514	1e-05
Pt152	ASO_PYK2	No LD50	No LD50	100	1e-05
Pt152	ASO_STAT3	No LD50	No LD50	100	1e-05
Pt152	BTZ	1.77e-08	2.75902e-09	66.9795	5e-08
Pt152	CFZ	3.88e-08	1.62077e-08	81.7197	5e-08
Pt152	DEFA	7.48e-06	1.77761e-06	62.3298	2e-05
Pt152	DEX	No LD50	5.102e-06	90.6091	1e-05
Pt152	DOX	1.47e-06	7.7737e-07	62.8438	5e-06
Pt152	IXA	No LD50	No LD50	98.4488	5e-08
Pt152	LEN	No LD50	No LD50	99.3887	1e-05
Pt152	MEL	5.73e-06	2.6755e-06	27.4986	5e-05
Pt152	PANO	No LD50	No LD50	97.3924	5e-08
Pt152	POM	No LD50	No LD50	96.1357	1e-05
Pt152	RICO	No LD50	No LD50	95.9202	1e-05
Pt153	BTZ	4.44e-09	1.03829e-09	53.5727	5e-08
Pt153	CFZ	3.46e-08	1.00256e-08	79.0281	5e-08
Pt153	PANO	No LD50	2.23179e-08	90.9919	5e-08
Pt153	POM	No LD50	No LD50	95.3106	1e-05
Pt154	BTZ	4.95e-08	2.42882e-09	66.0377	5e-08
Pt154	CFZ	3.18e-08	1.49175e-09	73.3787	5e-08
Pt154	PANO	2.32e-08	1.15066e-09	76.5007	5e-08
Pt154	POM	No LD50	9.96874e-06	93.3982	1e-05
Pt155	VEN	No LD50	No LD50	100	1e-05
Pt155	BTZ	No LD50	4.05578e-09	76.7222	5e-08
Pt155	CFZ	3.47e-08	1.12596e-08	80.8394	5e-08
Pt155	DEFA	No LD50	7.18734e-06	84.1057	2e-05
Pt155	DEX	No LD50	6.76333e-06	93.8183	1e-05
Pt155	DOX	2.32e-06	2.8538e-07	73.7249	5e-06
Pt155	IXA	No LD50	No LD50	97.5197	5e-08
Pt155	LEN	No LD50	No LD50	100	1e-05
Pt155	MEL	2.77e-05	1.64605e-06	73.2968	5e-05
Pt155	PANO	No LD50	4.86185e-08	99.6166	5e-08
Pt155	POM	No LD50	No LD50	98.1098	1e-05
Pt156	BTZ	3.93e-09	1.6079e-09	54.6162	5e-08
Pt156	CFZ	1.23e-08	4.94952e-09	62.8852	5e-08
Pt156	PANO	1.19e-08	3.68189e-09	64.3429	5e-08
Pt156	POM	No LD50	No LD50	97.0221	1e-05
Pt158	BTZ	9.57e-10	5.28984e-10	47.9951	5e-08
Pt158	CFZ	2.32e-09	4.70943e-10	46.3764	5e-08
Pt158	DEFA	9.55e-06	4.15183e-06	63.9714	2e-05
Pt158	DEX	No LD50	1.23017e-06	84.6177	1e-05
Pt158	DOX	4.92e-07	1.46735e-07	43.8807	5e-06
Pt158	IXA	9.1e-09	5.50608e-09	55.056	5e-08
Pt158	LEN	No LD50	No LD50	86.9447	1e-05
Pt158	MEL	1.26e-05	2.6413e-06	60.5212	5e-05
Pt158	PANO	7.18e-09	1.51766e-09	62.6594	5e-08
Pt158	POM	No LD50	9.72579e-06	87.4743	1e-05
Pt16	BTZ	5.41e-10	2.05113e-10	43.2326	5e-08
Pt16	DEX	No LD50	7.62427e-07	79.6423	1e-05
Pt16	LEN	No LD50	No LD50	91.8497	1e-05
Pt16	MEL	1.75e-06	6.89376e-07	50.8462	5e-05
Pt160	VEN	No LD50	2.93691e-06	79.0149	1e-05
Pt160	BI2536	3.36e-06	1.18793e-07	35.4764	1e-05
Pt160	BTZ	1.99e-09	4.09676e-10	56.6384	5e-08
Pt160	CFZ	2.82e-09	6.60353e-10	55.7086	5e-08
Pt160	CRIZ	5.24e-06	3.07718e-06	63.5133	1e-05
Pt160	DEFA	6.51e-06	8.4818e-07	49.3191	2e-05
Pt160	DEX	No LD50	1.49078e-06	87.3969	1e-05
Pt160	DOX	3.47e-07	7.80252e-08	37.345	5e-06
Pt160	INK128	9.79e-08	3.91779e-08	65.5448	1e-05
Pt160	IXA	1.25e-08	1.62342e-09	64.9921	5e-08
Pt160	LEN	No LD50	5.1163e-06	87.713	1e-05
Pt160	MEL	7.08e-06	1.36462e-06	44.9995	5e-05
Pt160	MK2206	9.43e-06	6.53793e-08	78.8373	1e-05
Pt160	PANO	1.11e-08	3.58827e-09	65.8369	5e-08
Pt160	POM	No LD50	No LD50	92.0818	1e-05
Pt160	PONA	6.63e-07	4.80035e-08	26.6009	1e-05
Pt160	RICO	2.97e-06	2.95146e-07	68.4876	1e-05
Pt160	THZ1	6.67e-08	2.66638e-08	16.8032	1e-05
Pt160	BTZ	7.88e-10	2.24713e-10	48.7123	5e-08
Pt160	CFZ	4.84e-09	1.86541e-09	53.1687	5e-08
Pt160	PANO	2.18e-08	1.19819e-08	74.1428	5e-08
Pt160	POM	No LD50	3.20331e-06	92.707	1e-05
Pt161	VEN	No LD50	9.9346e-08	72.9554	1e-05
Pt161	BI2536	5.64e-06	3.09124e-06	71.3345	1e-05
Pt161	BTZ	1.23e-09	4.66801e-10	54.6739	5e-08
Pt161	CFZ	3.71e-09	1.71208e-09	57.7781	5e-08
Pt161	CRIZ	4.57e-06	2.14721e-06	71.2514	1e-05
Pt161	DEFA	5.85e-06	3.0901e-06	51.9105	2e-05
Pt161	DEX	No LD50	No LD50	93.5184	1e-05
Pt161	DOX	2.12e-07	1.36727e-07	42.9483	5e-06
Pt161	INK128	1.54e-06	6.03666e-08	59.2354	1e-05
Pt161	IXA	9.57e-09	4.06692e-09	64.1155	5e-08
Pt161	LEN	No LD50	No LD50	92.4798	1e-05
Pt161	MEL	5.74e-06	3.65482e-06	47.8044	5e-05
Pt161	MK2206	1.67e-06	6.09117e-08	61.8158	1e-05
Pt161	PANO	2.36e-08	1.39953e-08	83.0628	5e-08
Pt161	POM	No LD50	No LD50	93.4124	1e-05
Pt161	PONA	1.6e-06	1.88499e-07	50.1585	1e-05
Pt161	RICO	5.99e-06	1.59648e-06	87.1867	1e-05
Pt161	THZ1	5.69e-07	1.62654e-07	38.517	1e-05
Pt161	BTZ	1.42e-09	4.47314e-10	55.2285	5e-08
Pt161	CFZ	1.06e-08	2.53906e-09	64.9939	5e-08
Pt161	PANO	2.49e-08	1.67963e-08	86.6744	5e-08
Pt161	POM	No LD50	No LD50	97.8823	1e-05
Pt163	VEN	No LD50	No LD50	90.9948	1e-05
Pt163	BI2536	9.9e-06	9.79427e-08	68.0143	1e-05
Pt163	BTZ	1.13e-09	5.58707e-10	35.2356	5e-08
Pt163	CFZ	2.07e-09	9.89473e-10	39.3248	5e-08
Pt163	CRIZ	1.66e-06	2.57799e-07	58.5034	1e-05
Pt163	DEFA	7.72e-06	3.83012e-06	54.4429	2e-05
Pt163	DEX	No LD50	7.52814e-08	77.7358	1e-05
Pt163	DOX	2.03e-07	7.84586e-08	28.3325	5e-06
Pt163	INK128	7.71e-08	3.0828e-08	54.9914	1e-05
Pt163	IXA	7.33e-09	3.63289e-09	53.1209	5e-08
Pt163	LEN	No LD50	No LD50	93.9679	1e-05
Pt163	MEL	2.16e-06	6.06531e-07	25.69	5e-05
Pt163	MK2206	2.64e-06	5.63471e-08	61.537	1e-05
Pt163	PANO	1.47e-08	2.06944e-09	70.729	5e-08
Pt163	POM	No LD50	No LD50	88.3545	1e-05
Pt163	PONA	9.7e-06	7.12908e-08	61.1946	1e-05
Pt163	RICO	No LD50	1.70763e-06	85.3784	1e-05
Pt163	THZ1	1.75e-07	1.25982e-07	21.5756	1e-05
Pt164	VEN	No LD50	No LD50	97.2585	1e-05
Pt164	BI2536	9.93e-06	5.09022e-07	77.8433	1e-05
Pt164	BTZ	2.2e-09	1.17978e-09	50.8588	5e-08
Pt164	CFZ	3.03e-09	1.42647e-09	50.9913	5e-08
Pt164	CRIZ	5.29e-06	2.5792e-06	72.4988	1e-05
Pt164	DEFA	1.84e-05	1.13415e-05	84.4241	2e-05
Pt164	DEX	No LD50	No LD50	100	1e-05
Pt164	DOX	4.57e-07	4.94339e-08	35.8706	5e-06
Pt164	INK128	4.06e-07	4.54696e-08	62.8903	1e-05
Pt164	IXA	1.25e-08	6.94983e-09	66.0632	5e-08
Pt164	LEN	No LD50	No LD50	100	1e-05
Pt164	MEL	8.46e-07	2.72667e-07	48.5298	5e-05
Pt164	MK2206	9.94e-06	9.98754e-08	77.4705	1e-05
Pt164	PANO	9.75e-09	4.45908e-09	65.3042	5e-08
Pt164	POM	No LD50	No LD50	100	1e-05
Pt164	PONA	4.67e-06	2.62049e-06	58.9779	1e-05
Pt164	RICO	7.01e-06	2.35629e-06	83.8509	1e-05
Pt164	THZ1	1.66e-07	7.49813e-08	21.8501	1e-05
Pt165	VEN	No LD50	3.69707e-06	87.2055	1e-05
Pt165	BI2536	3.38e-06	3.253e-07	56.6067	1e-05
Pt165	BTZ	1.59e-09	6.78218e-10	55.7954	5e-08
Pt165	CFZ	4.44e-09	1.69842e-09	53.6297	5e-08
Pt165	CRIZ	3.21e-06	5.24575e-07	54.3081	1e-05
Pt165	DEFA	7.27e-06	2.69705e-06	61.1291	2e-05
Pt165	DEX	No LD50	9.1289e-08	80.173	1e-05
Pt165	DOX	2.14e-07	3.82124e-08	43.1942	5e-06
Pt165	INK128	6.78e-08	2.71341e-08	40.1325	1e-05
Pt165	IXA	2.65e-08	5.63278e-09	69.7003	5e-08
Pt165	LEN	No LD50	4.60893e-06	92.4402	1e-05
Pt165	MEL	1.58e-05	3.55907e-07	46.6783	5e-05
Pt165	MK2206	2.74e-07	4.41154e-08	50.7699	1e-05
Pt165	PANO	5.14e-09	4.89887e-10	56.59	5e-08
Pt165	POM	No LD50	1.51363e-06	87.5798	1e-05
Pt165	PONA	9.76e-07	2.63499e-07	42.5172	1e-05
Pt165	RICO	2.79e-06	7.46916e-07	62.8609	1e-05
Pt165	THZ1	1.73e-07	6.01656e-08	35.5028	1e-05
Pt166	VEN	No LD50	2.60193e-07	81.7048	1e-05
Pt166	BI2536	No LD50	9.92466e-06	99.8225	1e-05
Pt166	BTZ	3.47e-09	9.26909e-10	67.7439	5e-08
Pt166	CFZ	5.75e-09	2.93405e-09	66.042	5e-08
Pt166	CRIZ	6.82e-06	3.55569e-06	80.7797	1e-05
Pt166	DEFA	9.03e-06	6.77009e-06	66.3289	2e-05
Pt166	DEX	No LD50	No LD50	89.7086	1e-05
Pt166	DOX	5.56e-07	2.90058e-07	54.7266	5e-06
Pt166	INK128	4.56e-06	9.78151e-08	70.0219	1e-05
Pt166	IXA	2.82e-08	8.84039e-09	82.7331	5e-08
Pt166	LEN	No LD50	No LD50	100	1e-05
Pt166	MEL	6.86e-06	4.76904e-07	39.1202	5e-05
Pt166	MK2206	3.71e-06	1.30197e-07	71.6342	1e-05
Pt166	PANO	2.21e-08	8.39105e-09	73.4106	5e-08
Pt166	POM	No LD50	No LD50	97.9193	1e-05
Pt166	PONA	4.58e-06	1.01576e-06	58.9755	1e-05
Pt166	RICO	5.72e-06	3.49722e-06	86.4653	1e-05
Pt166	THZ1	8.46e-08	3.38202e-08	28.0029	1e-05
Pt167	VEN	No LD50	4.22963e-06	80.6553	1e-05
Pt167	BI2536	3.58e-06	3.97317e-07	52.6335	1e-05
Pt167	BTZ	1.99e-08	2.57788e-09	61.4158	5e-08
Pt167	CFZ	2.03e-08	8.95493e-09	66.775	5e-08
Pt167	CRIZ	5.88e-06	2.79988e-06	64.478	1e-05
Pt167	DEFA	1.21e-05	2.96041e-06	66.1118	2e-05
Pt167	DEX	No LD50	No LD50	87.015	1e-05
Pt167	DOX	5.8e-07	3.91629e-07	47.1925	5e-06
Pt167	INK128	1.2e-07	4.0333e-08	45.17	1e-05
Pt167	IXA	No LD50	1.10449e-08	75.6934	5e-08
Pt167	LEN	No LD50	7.95157e-06	86.036	1e-05
Pt167	MEL	4.95e-05	5.32506e-06	62.9265	5e-05
Pt167	MK2206	5e-06	7.74544e-08	61.3626	1e-05
Pt167	PANO	2.92e-08	9.00115e-09	69.7199	5e-08
Pt167	POM	No LD50	9.42435e-06	82.8234	1e-05
Pt167	PONA	2.92e-06	5.71734e-08	43.5316	1e-05
Pt167	RICO	8.78e-06	3.05463e-06	73.803	1e-05
Pt167	THZ1	2.57e-07	8.4112e-08	39.3223	1e-05
Pt168	VEN	No LD50	No LD50	96.6175	1e-05
Pt168	BI2536	3.62e-06	3.34111e-06	52.6189	1e-05
Pt168	BTZ	1.16e-08	1.25385e-09	62.2983	5e-08
Pt168	CFZ	2.8e-08	5.51071e-09	67.7497	5e-08
Pt168	CRIZ	4.99e-06	3.44502e-06	70.5982	1e-05
Pt168	DEFA	7.12e-06	2.07884e-06	59.102	2e-05
Pt168	DEX	No LD50	6.26055e-08	83.4589	1e-05
Pt168	DOX	4.66e-07	2.30417e-07	53.251	5e-06
Pt168	INK128	9.01e-08	3.60543e-08	50.6436	1e-05
Pt168	IXA	No LD50	7.36402e-09	80.9246	5e-08
Pt168	LEN	No LD50	No LD50	99.9657	1e-05
Pt168	MEL	1.76e-05	8.94106e-07	46.429	5e-05
Pt168	MK2206	6.81e-06	3.46958e-07	74.0212	1e-05
Pt168	PANO	3.9e-08	1.14523e-09	75.6181	5e-08
Pt168	POM	No LD50	No LD50	97.8517	1e-05
Pt168	PONA	3.8e-06	1.55141e-06	51.6395	1e-05
Pt168	RICO	No LD50	1.46901e-06	78.4696	1e-05
Pt168	THZ1	2.78e-07	8.18244e-08	31.1797	1e-05
Pt169	VEN	7.64e-08	3.05555e-08	35.3138	1e-05
Pt169	BI2536	3.25e-06	3.75439e-07	51.4733	1e-05
Pt169	BTZ	6.94e-09	2.46239e-09	71.9611	5e-08
Pt169	CFZ	9.4e-09	3.61488e-09	62.6922	5e-08
Pt169	CRIZ	6.22e-06	3.52734e-06	82.8592	1e-05
Pt169	DEFA	8.3e-06	6.76572e-06	70.7528	2e-05
Pt169	DEX	No LD50	9.39577e-08	82.3694	1e-05
Pt169	DOX	1.48e-07	8.14954e-08	46.0534	5e-06
Pt169	INK128	6.97e-07	4.26328e-08	70.6667	1e-05
Pt169	IXA	No LD50	1.22881e-08	90.9444	5e-08
Pt169	LEN	No LD50	No LD50	100	1e-05
Pt169	MEL	9.26e-07	6.39246e-07	32.3593	5e-05
Pt169	MK2206	9.98e-06	9.42982e-08	78.0767	1e-05
Pt169	PANO	7.48e-09	5.41821e-09	68.3319	5e-08
Pt169	POM	No LD50	No LD50	99.992	1e-05
Pt169	PONA	3.45e-06	3.21625e-06	52.8742	1e-05
Pt169	RICO	3.1e-06	1.44309e-06	76.8824	1e-05
Pt169	THZ1	1.45e-07	8.88595e-08	22.6112	1e-05
Pt17	BTZ	9.38e-10	5.9584e-10	48.3113	5e-08
Pt17	DEX	No LD50	No LD50	100	1e-05
Pt17	LEN	No LD50	No LD50	100	1e-05
Pt17	MEL	No LD50	2.41194e-05	90.1292	5e-05
Pt170	VEN	No LD50	No LD50	88.6723	1e-05
Pt170	BI2536	5.24e-06	3.89087e-06	76.4073	1e-05
Pt170	BTZ	1.86e-09	7.67621e-10	58.7237	5e-08
Pt170	CFZ	4.84e-09	8.75327e-10	56.892	5e-08
Pt170	CRIZ	6.57e-06	4.19082e-06	76.8284	1e-05
Pt170	DEFA	1.1e-05	6.57513e-06	70.122	2e-05
Pt170	DEX	No LD50	No LD50	90.612	1e-05
Pt170	DOX	3.92e-07	1.39858e-07	47.3001	5e-06
Pt170	INK128	No LD50	7.20483e-08	82.2312	1e-05
Pt170	IXA	2.39e-08	1.05345e-08	76.6868	5e-08
Pt170	LEN	No LD50	No LD50	100	1e-05
Pt170	MK2206	No LD50	3.33208e-06	81.4551	1e-05
Pt170	PANO	1.77e-08	6.78754e-09	73.3103	5e-08
Pt170	POM	No LD50	No LD50	98.504	1e-05
Pt170	PONA	4.45e-06	1.1122e-06	65.9089	1e-05
Pt170	RICO	No LD50	4.22305e-06	88.943	1e-05
Pt170	THZ1	6.91e-07	3.88921e-07	39.9305	1e-05
Pt171	VEN	No LD50	No LD50	92.7029	1e-05
Pt171	BI2536	3.7e-06	1.80466e-06	62.0414	1e-05
Pt171	BTZ	1.29e-09	5.03228e-10	38.7188	5e-08
Pt171	CFZ	3.44e-09	1.90772e-09	51.5831	5e-08
Pt171	CRIZ	9.98e-06	2.36313e-06	85.3039	1e-05
Pt171	DEFA	1.24e-05	7.89741e-06	72.8232	2e-05
Pt171	DEX	No LD50	3.30222e-06	89.4054	1e-05
Pt171	DOX	4.15e-07	1.90499e-07	42.8631	5e-06
Pt171	INK128	6.17e-07	4.30545e-08	70.0503	1e-05
Pt171	IXA	1.03e-08	6.84749e-09	61.1353	5e-08
Pt171	LEN	No LD50	3.83823e-06	94.7628	1e-05
Pt171	MK2206	2.56e-06	2.20652e-07	68.2283	1e-05
Pt171	PANO	1.37e-08	6.81088e-09	68.2338	5e-08
Pt171	POM	No LD50	5.62669e-06	90.4918	1e-05
Pt171	PONA	3.65e-06	3.01555e-06	54.4335	1e-05
Pt171	RICO	6.27e-06	3.65004e-06	84.4437	1e-05
Pt171	THZ1	1.71e-07	1.04303e-07	32.4774	1e-05
Pt174	BTZ	2.08e-09	6.84944e-10	48.0476	5e-08
Pt174	CFZ	2.05e-09	4.78314e-10	41.875	5e-08
Pt174	DARA	No LD50	No LD50	92.392	7e-06
Pt174	DEFA	9.75e-06	6.56862e-06	71.9822	2e-05
Pt174	DEX	No LD50	8.50902e-08	78.3825	1e-05
Pt174	DOX	2.96e-07	1.74827e-07	44.8837	5e-06
Pt174	IXA	9.27e-09	5.43944e-09	57.9721	5e-08
Pt174	LEN	No LD50	No LD50	96.9349	1e-05
Pt174	PANO	7.03e-09	1.99632e-09	55.3579	5e-08
Pt174	POM	No LD50	No LD50	93.5842	1e-05
Pt176	BTZ	1.05e-09	4.10082e-10	48.7386	5e-08
Pt176	CFZ	1.66e-09	7.10658e-10	49.7584	5e-08
Pt176	DARA	No LD50	No LD50	92.872	7e-06
Pt176	DEFA	1.24e-05	7.55925e-06	80.1957	2e-05
Pt176	DEX	No LD50	No LD50	93.2473	1e-05
Pt176	DOX	1.93e-07	6.96774e-08	48.7431	5e-06
Pt176	IXA	8.5e-09	4.83677e-09	66.6319	5e-08
Pt176	LEN	No LD50	No LD50	100	1e-05
Pt176	PANO	4.17e-09	4.92224e-10	61.3832	5e-08
Pt176	POM	No LD50	No LD50	97.3075	1e-05
Pt177	BTZ	7.96e-10	2.66728e-10	48.9431	5e-08
Pt177	CFZ	2.91e-09	4.80256e-10	50.3892	5e-08
Pt177	DARA	No LD50	No LD50	95.8933	7e-06
Pt177	DEFA	6.12e-06	1.62527e-06	57.3338	2e-05
Pt177	DEX	No LD50	8.04799e-08	72.7311	1e-05
Pt177	DOX	2.86e-07	1.50111e-07	42.003	5e-06
Pt177	IXA	6.11e-09	1.24705e-09	55.0449	5e-08
Pt177	LEN	No LD50	3.12604e-06	78.9512	1e-05
Pt177	PANO	9.84e-09	4.26276e-09	58.8032	5e-08
Pt177	POM	No LD50	4.37525e-06	84.5945	1e-05
Pt178	VEN	No LD50	No LD50	95.8471	1e-05
Pt178	BI2536	3.1e-06	7.77529e-08	58.7658	1e-05
Pt178	BTZ	8.87e-10	6.17888e-10	34.6281	5e-08
Pt178	CFZ	9.75e-10	6.63594e-10	39.0834	5e-08
Pt178	CRIZ	9.22e-06	1.81449e-06	81.718	1e-05
Pt178	DARA	No LD50	No LD50	100	7e-06
Pt178	DEFA	7.4e-06	1.85123e-06	67.077	2e-05
Pt178	DEX	No LD50	9.03343e-08	82.6096	1e-05
Pt178	DOX	2.41e-07	3.76965e-08	42.1803	5e-06
Pt178	INK128	7.05e-08	2.8197e-08	46.3963	1e-05
Pt178	IXA	6.3e-09	4.47039e-09	45.1441	5e-08
Pt178	LEN	No LD50	No LD50	97.5199	1e-05
Pt178	MK2206	3.75e-06	7.09146e-08	69.9374	1e-05
Pt178	PANO	1.5e-08	6.22039e-09	67.0073	5e-08
Pt178	POM	No LD50	No LD50	94.178	1e-05
Pt178	PONA	2.82e-06	4.3042e-07	49.8322	1e-05
Pt178	RICO	3.84e-06	6.64915e-07	69.5113	1e-05
Pt178	THZ1	4.86e-07	3.05898e-07	37.451	1e-05
Pt179	VEN	No LD50	7.42076e-06	85.359	1e-05
Pt179	BI2536	3.79e-06	3.9009e-07	68.2771	1e-05
Pt179	BTZ	3.91e-09	1.44786e-09	57.543	5e-08
Pt179	CFZ	9.73e-09	4.1446e-09	63.855	5e-08
Pt179	CRIZ	4.28e-06	1.12818e-06	66.8685	1e-05
Pt179	DARA	No LD50	No LD50	100	7e-06
Pt179	DEFA	8.67e-06	4.94404e-06	66.2989	2e-05
Pt179	DEX	No LD50	2.55693e-06	89.5988	1e-05
Pt179	DOX	1.94e-07	6.65068e-08	43.5651	5e-06
Pt179	INK128	6.12e-06	5.06552e-08	67.7352	1e-05
Pt179	IXA	4.53e-08	1.00416e-08	82.6376	5e-08
Pt179	LEN	No LD50	4.30758e-06	88.4882	1e-05
Pt179	MK2206	6.49e-06	1.91651e-07	71.9524	1e-05
Pt179	PANO	9.24e-09	5.17048e-09	62.8892	5e-08
Pt179	POM	No LD50	7.79423e-08	78.6181	1e-05
Pt179	PONA	3.11e-06	1.02522e-06	57.0233	1e-05
Pt179	RICO	7.35e-06	4.22191e-06	83.4339	1e-05
Pt179	THZ1	2.92e-07	1.23781e-07	28.1692	1e-05
Pt18	BTZ	4.95e-10	1.97808e-10	35.2123	5e-08
Pt18	DEX	No LD50	No LD50	94.1923	1e-05
Pt18	LEN	No LD50	No LD50	100	1e-05
Pt18	MEL	4.2e-05	1.88986e-05	87.5663	5e-05
Pt180	VEN	1.54e-06	5.42354e-08	59.2126	1e-05
Pt180	BI2536	3.4e-06	1.49549e-06	65.9413	1e-05
Pt180	BTZ	2.05e-09	8.46875e-10	60.1096	5e-08
Pt180	CFZ	2.67e-09	9.6571e-10	56.4628	5e-08
Pt180	CRIZ	7.51e-06	3.36394e-06	79.835	1e-05
Pt180	DARA	No LD50	No LD50	95.6886	7e-06
Pt180	DEFA	1.31e-05	5.33066e-06	79.4229	2e-05
Pt180	DEX	No LD50	No LD50	97.8321	1e-05
Pt180	DOX	3.43e-07	8.75312e-08	56.2679	5e-06
Pt180	INK128	No LD50	7.92927e-08	78.1311	1e-05
Pt180	IXA	4.06e-08	7.1188e-09	77.5006	5e-08
Pt180	LEN	No LD50	No LD50	99.7828	1e-05
Pt180	MK2206	7.88e-06	5.87385e-07	75.3026	1e-05
Pt180	PANO	3.88e-08	1.64628e-08	86.712	5e-08
Pt180	POM	No LD50	No LD50	100	1e-05
Pt180	PONA	9.81e-06	6.40473e-07	77.5679	1e-05
Pt180	RICO	9.67e-06	4.24582e-06	91.6193	1e-05
Pt180	THZ1	9.09e-08	3.63482e-08	44.0623	1e-05
Pt180	BTZ	4.33e-09	2.42825e-09	59.5643	5e-08
Pt180	CFZ	3.76e-09	2.14241e-09	56.3282	5e-08
Pt180	PANO	3.84e-08	1.87653e-08	89.6609	5e-08
Pt180	POM	No LD50	No LD50	100	1e-05
Pt181	VEN	No LD50	1.39937e-06	85.1212	1e-05
Pt181	BI2536	1.51e-06	7.80887e-08	45.327	1e-05
Pt181	BTZ	7.79e-10	3.6119e-10	27.1639	5e-08
Pt181	CFZ	1.6e-09	5.90143e-10	29.8796	5e-08
Pt181	CPD22	2.33e-06	2.09312e-06	46.7659	1e-05
Pt181	DARA	No LD50	No LD50	97.8707	7e-06
Pt181	DEX	No LD50	8.0141e-08	84.0935	1e-05
Pt181	DOX	4.38e-07	8.55859e-08	27.672	5e-06
Pt181	INK128	4.95e-07	4.48408e-08	62.4248	1e-05
Pt181	IXA	7.21e-09	3.36778e-09	41.2879	5e-08
Pt181	SELI	7.11e-07	2.1326e-07	40.3655	1e-05
Pt181	LEN	No LD50	6.12282e-08	81.4935	1e-05
Pt181	MA7-038	No LD50	No LD50	91.8409	1e-05
Pt181	MEL	6.11e-07	2.39231e-07	21.2389	5e-05
Pt181	PANO	6.17e-09	1.48589e-09	44.9486	5e-08
Pt181	POM	No LD50	5.68691e-08	81.0339	1e-05
Pt181	SILMI	No LD50	2.12341e-06	84.5015	1e-05
Pt181	THZ1	8.45e-07	2.32384e-07	26.3557	1e-05
Pt181	VOLA	1.61e-06	9.32083e-08	53.1592	1e-05
Pt182	BTZ	2.09e-09	3.88112e-10	41.9693	5e-08
Pt182	CFZ	2.54e-09	6.4242e-10	47.0918	5e-08
Pt182	DARA	No LD50	No LD50	97.536	7e-06
Pt182	DEX	No LD50	No LD50	91.7775	1e-05
Pt182	DOX	2.82e-07	1.43846e-07	39.1515	5e-06
Pt182	IXA	1.86e-08	8.63494e-09	64.3345	5e-08
Pt182	SELI	2.77e-06	5.32248e-08	61.9816	1e-05
Pt182	LEN	No LD50	No LD50	97.8502	1e-05
Pt182	MA7-038	No LD50	No LD50	95.254	1e-05
Pt182	MEL	4.61e-07	1.84463e-07	27.0317	5e-05
Pt182	PANO	1.07e-08	2.05746e-09	60.8931	5e-08
Pt182	POM	No LD50	No LD50	100	1e-05
Pt183	BTZ	2.66e-09	1.91103e-09	40.0341	5e-08
Pt183	CFZ	5.38e-09	3.51618e-09	46.8557	5e-08
Pt183	PANO	2.25e-08	9.86754e-09	78.9629	5e-08
Pt183	POM	No LD50	1.98678e-07	84.2016	1e-05
Pt184	BTZ	1.92e-08	7.13478e-09	72.9967	5e-08
Pt184	CFZ	1.01e-08	8.58231e-10	67.4819	5e-08
Pt184	DARA	No LD50	No LD50	100	7e-06
Pt184	DEX	No LD50	7.88105e-06	86.8915	1e-05
Pt184	DOX	2.89e-07	8.55643e-08	54.1795	5e-06
Pt184	IXA	4.97e-08	4.19596e-10	80.8463	5e-08
Pt184	SELI	4.05e-06	4.21565e-08	57.2853	1e-05
Pt184	LEN	No LD50	No LD50	90.9148	1e-05
Pt184	MA7-038	No LD50	8.13194e-08	87.229	1e-05
Pt184	PANO	8.98e-09	3.94237e-09	59.7123	5e-08
Pt184	POM	No LD50	2.74244e-07	83.26	1e-05
Pt186	BTZ	3.47e-09	2.09998e-09	60.6003	5e-08
Pt186	CFZ	1.22e-08	6.79424e-09	75.9004	5e-08
Pt186	DARA	No LD50	No LD50	100	7e-06
Pt186	DEX	No LD50	No LD50	95.5949	1e-05
Pt186	DOX	1.28e-07	5.82881e-08	45.6072	5e-06
Pt186	IXA	2.33e-08	1.05903e-08	80.4898	5e-08
Pt186	SELI	No LD50	9.20882e-06	98.4001	1e-05
Pt186	LEN	No LD50	No LD50	100	1e-05
Pt186	MA7-038	No LD50	No LD50	100	1e-05
Pt186	MEL	6.12e-07	2.26426e-07	28.4637	5e-05
Pt186	PANO	2.05e-08	1.26679e-08	81.3736	5e-08
Pt186	POM	No LD50	No LD50	100	1e-05
Pt187	VEN	No LD50	7.55407e-08	74.4063	1e-05
Pt187	BI2536	3.66e-06	3.18127e-06	66.916	1e-05
Pt187	BTZ	7.29e-09	2.34276e-09	51.8818	5e-08
Pt187	CFZ	5.56e-09	2.47285e-09	46.2743	5e-08
Pt187	CPD22	2.29e-06	1.98791e-06	42.123	1e-05
Pt187	DARA	No LD50	No LD50	100	7e-06
Pt187	DEX	No LD50	No LD50	100	1e-05
Pt187	DOX	6.12e-07	4.69877e-07	50.0195	5e-06
Pt187	INK128	No LD50	9.85959e-06	95.2636	1e-05
Pt187	IXA	3.37e-08	1.95778e-08	81.4881	5e-08
Pt187	SELI	4.05e-06	1.5651e-07	58.067	1e-05
Pt187	LEN	No LD50	No LD50	100	1e-05
Pt187	MA7-038	No LD50	No LD50	100	1e-05
Pt187	MEL	1.5e-06	2.9198e-07	28.3336	5e-05
Pt187	PANO	2.38e-08	1.54618e-08	77.4407	5e-08
Pt187	POM	No LD50	No LD50	100	1e-05
Pt187	SILMI	No LD50	6.16325e-06	93.6265	1e-05
Pt187	THZ1	6.45e-08	2.57881e-08	25.5335	1e-05
Pt187	VOLA	6.79e-06	3.3916e-06	79.3598	1e-05
Pt187	BTZ	2.55e-09	1.74772e-09	42.1224	5e-08
Pt187	CFZ	1.83e-09	8.67729e-10	36.6587	5e-08
Pt187	PANO	2e-08	1.04246e-08	77.8376	5e-08
Pt187	POM	No LD50	No LD50	100	1e-05
Pt188	BTZ	9.44e-09	1.98774e-09	59.7015	5e-08
Pt188	CFZ	3.84e-08	9.40537e-10	66.3385	5e-08
Pt188	PANO	1.3e-08	2.7243e-09	63.5288	5e-08
Pt188	POM	No LD50	No LD50	92.9169	1e-05
Pt192	BTZ	4.88e-08	7.42357e-09	76.168	5e-08
Pt192	CFZ	1.43e-08	6.45271e-09	71.3562	5e-08
Pt192	PANO	1.71e-08	6.71565e-09	70.0589	5e-08
Pt192	POM	No LD50	7.01196e-06	91.6919	1e-05
Pt193	VEN	No LD50	No LD50	97.1339	1e-05
Pt193	BI2536	5.26e-06	2.18534e-06	64.8655	1e-05
Pt193	BTZ	1.83e-08	2.48657e-09	64.0174	5e-08
Pt193	CFZ	3.85e-08	1.2915e-08	73.9319	5e-08
Pt193	CPD22	1.46e-06	1.22106e-06	37.1724	1e-05
Pt193	DARA	No LD50	No LD50	100	7e-06
Pt193	DEX	No LD50	3.66226e-06	83.2373	1e-05
Pt193	DOX	5.89e-07	2.82938e-07	44.9768	5e-06
Pt193	INK128	7.79e-08	3.11794e-08	47.3589	1e-05
Pt193	IXA	No LD50	2.94909e-08	92.2608	5e-08
Pt193	SELI	No LD50	3.98907e-06	79.2289	1e-05
Pt193	LEN	No LD50	5.05928e-06	86.0676	1e-05
Pt193	MA7-038	No LD50	No LD50	99.2816	1e-05
Pt193	MEL	2.91e-05	9.78895e-07	64.3361	5e-05
Pt193	PANO	No LD50	9.75004e-09	77.0251	5e-08
Pt193	POM	No LD50	No LD50	97.8256	1e-05
Pt193	SILMI	7.97e-06	3.94653e-06	79.7934	1e-05
Pt193	THZ1	6.98e-08	2.79261e-08	34.8623	1e-05
Pt193	VOLA	4.27e-06	1.70409e-06	57.4932	1e-05
Pt193	BTZ	7.17e-09	5.84654e-10	54.2837	5e-08
Pt193	CFZ	1.1e-08	5.55549e-10	55.5529	5e-08
Pt193	PANO	4.76e-08	9.56875e-09	76.8493	5e-08
Pt193	POM	No LD50	1.83972e-07	76.6443	1e-05
Pt194	BTZ	1.89e-09	7.74217e-10	45.1462	5e-08
Pt194	CFZ	3.39e-09	1.23916e-09	50.2488	5e-08
Pt194	PANO	1.95e-08	6.84461e-09	78.9919	5e-08
Pt194	POM	No LD50	No LD50	95.5263	1e-05
Pt195	BTZ	2.24e-09	7.36695e-10	39.4961	5e-08
Pt195	CFZ	2.5e-09	7.91921e-10	39.4424	5e-08
Pt195	PANO	2.78e-08	1.16184e-08	79.9672	5e-08
Pt195	POM	No LD50	No LD50	96.7494	1e-05
Pt196	VEN	No LD50	4.50126e-07	71.1042	1e-05
Pt196	BI2536	3.35e-06	6.94853e-08	56.8615	1e-05
Pt196	BTZ	2.31e-09	1.1733e-09	49.1278	5e-08
Pt196	CFZ	1.67e-09	3.25497e-10	50.0152	5e-08
Pt196	CPD22	1.99e-06	1.17239e-06	48.9345	1e-05
Pt196	DARA	No LD50	No LD50	100	7e-06
Pt196	DEX	No LD50	9.55885e-08	85.0562	1e-05
Pt196	DOX	2.8e-07	4.62764e-08	37.5892	5e-06
Pt196	INK128	4.44e-06	2.34678e-07	67.5427	1e-05
Pt196	IXA	1.82e-08	8.18004e-09	74.7476	5e-08
Pt196	SELI	1.02e-06	6.66559e-08	42.7571	1e-05
Pt196	LEN	No LD50	2.23878e-07	81.9579	1e-05
Pt196	MA7-038	No LD50	1.90093e-06	86.7053	1e-05
Pt196	MEL	4.14e-07	1.65528e-07	34.0447	5e-05
Pt196	PANO	4.45e-09	9.7701e-10	53.8159	5e-08
Pt196	POM	No LD50	1.13757e-07	85.1422	1e-05
Pt196	SILMI	No LD50	3.48563e-06	82.8256	1e-05
Pt196	THZ1	3.32e-07	1.67184e-07	30.6891	1e-05
Pt196	VOLA	4.07e-06	1.03171e-06	64.2862	1e-05
Pt196	BTZ	1.12e-08	2.36896e-09	69.8798	5e-08
Pt196	CFZ	1.41e-08	1.75518e-09	70.1579	5e-08
Pt196	PANO	2.22e-08	3.27902e-09	69.8898	5e-08
Pt196	POM	No LD50	No LD50	99.9873	1e-05
Pt197	BTZ	9.31e-09	2.39096e-09	68.0811	5e-08
Pt197	CFZ	1.14e-08	1.10434e-09	70.7119	5e-08
Pt197	PANO	4.29e-08	8.09105e-09	83.3199	5e-08
Pt197	POM	No LD50	No LD50	98.1471	1e-05
Pt198	BTZ	5.2e-09	1.56444e-09	46.4215	5e-08
Pt198	CFZ	1.57e-08	6.66542e-09	59.4263	5e-08
Pt198	DARA	No LD50	No LD50	98.2323	7e-06
Pt198	DEX	No LD50	1.48299e-07	89.1867	1e-05
Pt198	DOX	6.39e-07	1.88375e-07	53.3426	5e-06
Pt198	IXA	2.36e-08	5.83881e-09	69.932	5e-08
Pt198	SELI	No LD50	2.30445e-07	79.9237	1e-05
Pt198	LEN	No LD50	No LD50	94.7969	1e-05
Pt198	MA7-038	No LD50	No LD50	93.2298	1e-05
Pt198	MEL	1.06e-05	6.51864e-07	35.8473	5e-05
Pt198	PANO	4.19e-08	8.84465e-09	76.77	5e-08
Pt198	POM	No LD50	No LD50	95.4035	1e-05
Pt199	BTZ	8.05e-09	2.02611e-09	64.9502	5e-08
Pt199	CFZ	2.49e-08	1.58075e-09	74.9398	5e-08
Pt199	DARA	No LD50	No LD50	98.001	7e-06
Pt199	DEX	No LD50	8.95964e-08	83.867	1e-05
Pt199	DOX	5.49e-07	1.44573e-07	45.5495	5e-06
Pt199	IXA	3.26e-08	1.00532e-08	77.3438	5e-08
Pt199	SELI	No LD50	5.78642e-07	79.6748	1e-05
Pt199	LEN	No LD50	No LD50	93.4383	1e-05
Pt199	MA7-038	No LD50	No LD50	93.6809	1e-05
Pt199	MEL	7.67e-06	2.33843e-07	43.7544	5e-05
Pt199	PANO	1.12e-08	1.71969e-09	65.5694	5e-08
Pt199	POM	No LD50	No LD50	92.9062	1e-05
Pt200	BTZ	1.85e-08	1.83847e-09	61.1232	5e-08
Pt200	CFZ	2.07e-08	4.78108e-09	66.592	5e-08
Pt200	DARA	No LD50	No LD50	100	7e-06
Pt200	DEX	No LD50	4.40742e-08	62.4515	1e-05
Pt200	DOX	5.46e-07	3.68512e-07	52.9396	5e-06
Pt200	IXA	4.72e-08	1.79685e-08	80.4462	5e-08
Pt200	SELI	No LD50	6.24655e-07	80.0729	1e-05
Pt200	LEN	No LD50	No LD50	90.5649	1e-05
Pt200	MA7-038	No LD50	No LD50	88.5569	1e-05
Pt200	MEL	4.24e-07	1.69587e-07	30.2699	5e-05
Pt200	PANO	1.82e-08	1.78597e-09	62.6086	5e-08
Pt200	POM	No LD50	No LD50	95.7881	1e-05
Pt201	BTZ	3.07e-09	1.69589e-09	53.5778	5e-08
Pt201	CFZ	6.16e-09	9.2236e-10	59.7997	5e-08
Pt201	DARA	No LD50	No LD50	91.9057	7e-06
Pt201	DEX	No LD50	8.36259e-08	86.1617	1e-05
Pt201	DOX	4.58e-07	1.20001e-07	47.6565	5e-06
Pt201	IXA	2.33e-08	2.03228e-09	67.9645	5e-08
Pt201	SELI	No LD50	6.651e-07	77.7734	1e-05
Pt201	LEN	No LD50	No LD50	97.0721	1e-05
Pt201	MA7-038	No LD50	No LD50	93.1532	1e-05
Pt201	MEL	6.73e-06	2.29557e-07	39.9073	5e-05
Pt201	PANO	1.25e-08	4.95898e-09	68.9341	5e-08
Pt201	POM	No LD50	No LD50	99.9024	1e-05
Pt203	VEN	No LD50	No LD50	94.5385	1e-05
Pt203	BI2536	4.94e-06	2.9571e-06	76.487	1e-05
Pt203	BTZ	8.85e-09	2.80214e-09	62.6365	5e-08
Pt203	CFZ	1.72e-08	5.49027e-09	68.6685	5e-08
Pt203	CPD22	2.68e-06	2.23455e-06	49.9516	1e-05
Pt203	DARA	No LD50	No LD50	100	7e-06
Pt203	DEX	No LD50	No LD50	97.4203	1e-05
Pt203	DINA	1.57e-09	6.33921e-10	39.3498	1e-07
Pt203	DOX	5.17e-07	1.49205e-07	49.9329	5e-06
Pt203	INK128	1.6e-07	4.15883e-08	61.8786	1e-05
Pt203	IXA	4.28e-08	2.40818e-08	81.261	5e-08
Pt203	SELI	No LD50	4.4801e-06	89.2956	1e-05
Pt203	LEN	No LD50	No LD50	100	1e-05
Pt203	MA7-038	No LD50	No LD50	100	1e-05
Pt203	MEL	7.87e-06	1.13864e-06	45.0846	5e-05
Pt203	PANO	4.16e-08	8.11933e-09	81.2804	5e-08
Pt203	POM	No LD50	No LD50	100	1e-05
Pt203	SILMI	No LD50	7.2888e-06	91.2201	1e-05
Pt203	THZ1	5.65e-07	3.74215e-07	43.7419	1e-05
Pt203	VOLA	5.03e-06	3.15753e-06	77.4335	1e-05
Pt203	BTZ	5.17e-09	1.88969e-09	63.1168	5e-08
Pt203	CFZ	7.76e-09	2.78959e-09	64.6018	5e-08
Pt203	PANO	1.57e-08	6.78467e-09	73.0573	5e-08
Pt203	POM	No LD50	No LD50	93.3918	1e-05
Pt204	VEN	No LD50	No LD50	91.0854	1e-05
Pt204	BI2536	3.41e-06	8.91501e-08	54.5942	1e-05
Pt204	BTZ	1.68e-09	7.52759e-10	50.6289	5e-08
Pt204	CFZ	7.01e-09	1.19348e-09	59.5618	5e-08
Pt204	CPD22	3.46e-06	2.23152e-06	53.146	1e-05
Pt204	DARA	No LD50	No LD50	95.705	7e-06
Pt204	DEX	No LD50	No LD50	92.4127	1e-05
Pt204	DINA	9.58e-10	3.8326e-10	32.4178	1e-07
Pt204	DOX	5.93e-07	4.01686e-07	47.5159	5e-06
Pt204	INK128	No LD50	4.99937e-08	75.5492	1e-05
Pt204	IXA	1.37e-08	1.36554e-09	63.4705	5e-08
Pt204	SELI	9.13e-06	9.97415e-08	72.7298	1e-05
Pt204	LEN	No LD50	7.56903e-07	87.9832	1e-05
Pt204	MA7-038	No LD50	No LD50	87.7431	1e-05
Pt204	MEL	4.95e-05	4.9183e-07	63.2759	5e-05
Pt204	PANO	2.63e-08	6.63194e-09	75.219	5e-08
Pt204	POM	No LD50	4.57029e-06	89.8584	1e-05
Pt204	SILMI	8.24e-06	8.38939e-07	75.9017	1e-05
Pt204	THZ1	1.02e-06	4.24952e-07	42.4115	1e-05
Pt204	VOLA	3.54e-06	9.29976e-08	56.9532	1e-05
Pt204	BTZ	2.91e-09	7.82083e-10	63.6692	5e-08
Pt204	CFZ	7.28e-09	1.26138e-09	64.885	5e-08
Pt204	PANO	4.37e-08	6.32805e-09	79.9483	5e-08
Pt204	POM	No LD50	No LD50	97.9002	1e-05
Pt205	VEN	No LD50	No LD50	94.1745	1e-05
Pt205	BI2536	3.35e-06	1.94899e-07	55.6647	1e-05
Pt205	BTZ	4.5e-09	1.41653e-09	56.1299	5e-08
Pt205	CPD22	1.5e-06	1.14545e-06	38.1095	1e-05
Pt205	DARA	No LD50	6.18133e-08	88.2511	7e-06
Pt205	DEX	No LD50	6.19917e-08	75.1198	1e-05
Pt205	DINA	1.13e-08	4.38646e-09	43.6657	1e-07
Pt205	DOX	3.2e-07	1.85231e-07	49.0939	5e-06
Pt205	INK128	1.27e-07	4.04607e-08	58.564	1e-05
Pt205	IXA	3.98e-08	1.54163e-08	83.1285	5e-08
Pt205	SELI	3.27e-06	9.10537e-08	69.3493	1e-05
Pt205	LEN	No LD50	9.65279e-06	93.5479	1e-05
Pt205	MA7-038	No LD50	No LD50	93.4527	1e-05
Pt205	MEL	6.19e-06	2.39894e-07	29.726	5e-05
Pt205	PANO	7.92e-09	7.14721e-10	58.1644	5e-08
Pt205	POM	No LD50	7.45375e-06	95.0305	1e-05
Pt205	SILMI	8.71e-06	3.05046e-06	86.0216	1e-05
Pt205	THZ1	9.1e-08	3.63819e-08	33.3552	1e-05
Pt205	VOLA	3.38e-06	3.10512e-07	56.1964	1e-05
Pt206	VEN	No LD50	4.77532e-06	88.266	1e-05
Pt206	BI2536	2.82e-06	1.45513e-06	72.8274	1e-05
Pt206	BTZ	1.88e-09	8.27665e-10	41.2614	5e-08
Pt206	CFZ	3.06e-09	1.71202e-09	52.6731	5e-08
Pt206	CPD22	2.34e-06	1.91623e-06	53.1604	1e-05
Pt206	DARA	No LD50	No LD50	98.5824	7e-06
Pt206	DEX	No LD50	1.59888e-06	85.007	1e-05
Pt206	DINA	1.27e-08	8.65395e-09	36.6499	1e-07
Pt206	DOX	2.19e-07	6.72976e-08	40.0587	5e-06
Pt206	INK128	3.42e-06	4.67426e-08	67.6014	1e-05
Pt206	IXA	2.58e-08	1.50898e-08	74.9296	5e-08
Pt206	SELI	3.15e-06	7.69815e-07	69.0829	1e-05
Pt206	LEN	No LD50	No LD50	94.2998	1e-05
Pt206	MA7-038	No LD50	No LD50	96.3676	1e-05
Pt206	MEL	1.15e-05	1.34175e-06	56.4039	5e-05
Pt206	PANO	6.14e-09	1.11626e-09	61.6979	5e-08
Pt206	POM	No LD50	8.79898e-06	96.6904	1e-05
Pt206	SILMI	No LD50	7.24051e-06	93.2825	1e-05
Pt206	THZ1	6.98e-08	2.793e-08	27.8608	1e-05
Pt206	VOLA	3.62e-06	7.73767e-07	65.9555	1e-05
Pt206	BTZ	3.31e-09	1.85556e-09	48.0732	5e-08
Pt206	CFZ	5.38e-09	1.66729e-09	50.1935	5e-08
Pt206	PANO	1.43e-08	5.38216e-09	73.8455	5e-08
Pt206	POM	No LD50	No LD50	96.8662	1e-05
Pt207	BTZ	3.91e-09	1.48585e-09	57.978	5e-08
Pt207	CFZ	3.89e-09	7.838e-10	45.2978	5e-08
Pt207	DARA	No LD50	No LD50	96.5532	7e-06
Pt207	DEX	No LD50	6.4759e-06	90.3369	1e-05
Pt207	DOX	3.82e-07	9.88241e-08	54.1613	5e-06
Pt207	IXA	4.92e-08	6.76696e-09	75.2062	5e-08
Pt207	SELI	No LD50	7.94206e-08	75.3385	1e-05
Pt207	LEN	No LD50	3.11722e-06	87.1504	1e-05
Pt207	MA7-038	No LD50	No LD50	91.5677	1e-05
Pt207	MEL	1.24e-05	2.86633e-06	63.1614	5e-05
Pt207	PANO	No LD50	6.39967e-09	81.7466	5e-08
Pt207	POM	9.03e-06	1.86562e-06	75.6857	1e-05
Pt21	BTZ	1.07e-08	4.77964e-10	62.093	5e-08
Pt21	DEX	4.36e-07	4.44454e-08	73.3006	1e-05
Pt21	LEN	No LD50	7.73321e-08	87.6737	1e-05
Pt21	MEL	No LD50	8.12495e-06	88.6631	5e-05
Pt210	BTZ	4.75e-10	1.90191e-10	49.9852	5e-08
Pt210	CFZ	2.07e-09	3.33621e-10	56.3188	5e-08
Pt210	DARA	No LD50	No LD50	100	7e-06
Pt210	DEX	No LD50	9.31196e-08	81.2182	1e-05
Pt210	DOX	1.64e-07	8.18878e-08	46.0004	5e-06
Pt210	IXA	5.38e-09	8.85313e-10	61.5479	5e-08
Pt210	SELI	9.98e-08	3.99209e-08	60.6689	1e-05
Pt210	LEN	No LD50	No LD50	91.6481	1e-05
Pt210	MA7-038	No LD50	No LD50	92.8608	1e-05
Pt210	MEL	4.43e-06	1.83077e-06	52.6931	5e-05
Pt210	PANO	1.47e-08	6.00697e-09	69.7233	5e-08
Pt210	POM	No LD50	No LD50	91.7833	1e-05
Pt211	VEN	No LD50	9.86527e-08	81.5048	1e-05
Pt211	BTZ	1.81e-09	6.38406e-10	45.3599	5e-08
Pt211	CFZ	4.86e-10	1.94263e-10	47.3096	5e-08
Pt211	CPD22	1.45e-06	1.17812e-06	44.5007	1e-05
Pt211	DEX	No LD50	9.11951e-08	88.6309	1e-05
Pt211	DINA	6.37e-09	2.34408e-09	40.0794	1e-07
Pt211	DOX	3.24e-07	1.90097e-07	43.5127	5e-06
Pt211	INK128	3.29e-07	4.3746e-08	69.3271	1e-05
Pt211	IXA	1.5e-08	5.93605e-09	62.8981	5e-08
Pt211	SELI	5.75e-07	7.53285e-08	56.9962	1e-05
Pt211	LEN	No LD50	1.80379e-06	94.4344	1e-05
Pt211	MA7-038	No LD50	No LD50	94.8285	1e-05
Pt211	MEL	1.67e-05	1.43611e-05	67.7084	5e-05
Pt211	MK2206	2.7e-06	5.26931e-08	71.8244	1e-05
Pt211	PALB	No LD50	No LD50	94.0187	1e-05
Pt211	PANO	1e-08	5.3482e-09	64.9644	5e-08
Pt211	POM	No LD50	3.78849e-06	90.5231	1e-05
Pt211	RUXO	No LD50	2.88054e-07	85.0046	1e-05
Pt211	SILMI	8.87e-06	3.01283e-06	86.0327	1e-05
Pt211	VOLA	3.34e-06	4.53271e-07	59.2028	1e-05
Pt211	BTZ	5.28e-09	4.52254e-10	50.8428	5e-08
Pt211	CFZ	5.91e-09	2.96738e-10	49.7289	5e-08
Pt211	PANO	2.95e-08	4.98505e-09	76.223	5e-08
Pt211	POM	No LD50	No LD50	96.0211	1e-05
Pt212	VEN	No LD50	8.27197e-06	94.1416	1e-05
Pt212	BTZ	5.27e-09	2.56407e-09	51.7737	5e-08
Pt212	CFZ	5.26e-09	2.15443e-09	58.8796	5e-08
Pt212	CPD22	1.91e-06	1.34708e-06	61.2301	1e-05
Pt212	DEX	No LD50	No LD50	96.666	1e-05
Pt212	DINA	1.96e-08	7.85957e-09	63.0733	1e-07
Pt212	DOX	5.15e-07	4.44803e-08	42.972	5e-06
Pt212	INK128	8.25e-06	5.09821e-08	78.5688	1e-05
Pt212	IXA	3.66e-08	1.84152e-08	81.5757	5e-08
Pt212	SELI	No LD50	1.17826e-07	79.2031	1e-05
Pt212	LEN	No LD50	9.99046e-06	96.6644	1e-05
Pt212	MA7-038	No LD50	No LD50	99.118	1e-05
Pt212	MEL	4.42e-05	1.34145e-06	68.0239	5e-05
Pt212	MK2206	4.34e-06	7.81424e-08	67.5471	1e-05
Pt212	PALB	No LD50	No LD50	95.5259	1e-05
Pt212	PANO	4.68e-08	6.3162e-09	75.9259	5e-08
Pt212	POM	No LD50	No LD50	100	1e-05
Pt212	RUXO	No LD50	7.76451e-06	88.3626	1e-05
Pt212	SILMI	No LD50	9.6856e-06	95.3135	1e-05
Pt212	VOLA	No LD50	7.96673e-07	85.5003	1e-05
Pt212	BTZ	1.78e-08	1.14175e-09	69.6708	5e-08
Pt212	CFZ	1.8e-08	4.92958e-10	69.1061	5e-08
Pt212	PANO	1.96e-08	1.9046e-09	69.8794	5e-08
Pt212	POM	No LD50	No LD50	91.5357	1e-05
Pt213	VEN	No LD50	8.99314e-08	78.6016	1e-05
Pt213	BI2536	3.46e-06	5.25167e-08	66.9248	1e-05
Pt213	BTZ	4.45e-09	1.16967e-09	49.2241	5e-08
Pt213	CFZ	8.88e-09	4.26177e-10	54.9604	5e-08
Pt213	CPD22	1.85e-06	1.33505e-06	53.0094	1e-05
Pt213	DARA	No LD50	No LD50	96.0286	7e-06
Pt213	DEX	No LD50	No LD50	89.8816	1e-05
Pt213	DINA	No LD50	7.99013e-08	88.0735	1e-07
Pt213	DOX	7.5e-07	2.39994e-07	48.549	5e-06
Pt213	INK128	9.66e-08	3.8631e-08	71.3003	1e-05
Pt213	IXA	3.47e-08	2.29584e-09	69.1303	5e-08
Pt213	SELI	9.86e-06	6.09772e-08	67.8437	1e-05
Pt213	LEN	No LD50	No LD50	99.9948	1e-05
Pt213	MA7-038	No LD50	No LD50	89.4822	1e-05
Pt213	MEL	No LD50	4.84286e-06	70.1568	5e-05
Pt213	PANO	3.44e-08	1.48344e-09	72.6585	5e-08
Pt213	POM	No LD50	No LD50	97.6272	1e-05
Pt213	SILMI	No LD50	No LD50	91.6751	1e-05
Pt213	THZ1	1.72e-07	6.28771e-08	30.8577	1e-05
Pt213	VOLA	4.59e-06	6.80597e-08	67.669	1e-05
Pt213	BTZ	7.51e-09	1.84795e-09	47.246	5e-08
Pt213	CFZ	6.07e-09	2.0786e-09	50.4147	5e-08
Pt213	PANO	3.49e-08	7.06958e-09	80.5176	5e-08
Pt213	POM	No LD50	No LD50	100	1e-05
Pt214	BTZ	1.12e-09	4.73798e-10	49.6559	5e-08
Pt214	CFZ	1.47e-09	3.82946e-10	46.3207	5e-08
Pt214	PANO	2.05e-08	1.12763e-08	80.2897	5e-08
Pt214	POM	No LD50	No LD50	96.9245	1e-05
Pt216	BTZ	5.04e-09	1.86376e-09	67.051	5e-08
Pt216	CFZ	2.33e-09	5.14232e-10	61.513	5e-08
Pt216	PANO	1.78e-08	2.87222e-09	72.8871	5e-08
Pt216	POM	No LD50	No LD50	94.4972	1e-05
Pt217	BTZ	2.08e-09	1.68345e-09	42.9257	5e-08
Pt217	CFZ	2.14e-09	1.70123e-09	38.5416	5e-08
Pt217	PANO	1.55e-08	6.23042e-09	60.1222	5e-08
Pt217	POM	No LD50	No LD50	100	1e-05
Pt218	VEN	No LD50	9.77085e-08	72.8919	1e-05
Pt218	BTZ	7.19e-10	2.812e-10	29.3931	5e-08
Pt218	CFZ	9.81e-10	3.30662e-10	34.6438	5e-08
Pt218	CPD22	1.66e-06	1.31219e-06	37.8956	1e-05
Pt218	DARA	No LD50	No LD50	100	7e-06
Pt218	DEX	No LD50	9.30552e-08	83.7745	1e-05
Pt218	DINA	7.05e-09	4.04593e-09	25.7098	1e-07
Pt218	DOX	2.28e-07	1.59066e-07	30.714	5e-06
Pt218	INK128	1.95e-06	4.22904e-08	62.0777	1e-05
Pt218	IXA	1.02e-08	5.84589e-09	53.7025	5e-08
Pt218	JNK-IN-8	No LD50	7.09325e-06	97.5604	1e-05
Pt218	LEN	No LD50	4.5837e-07	87.4236	1e-05
Pt218	39621	No LD50	No LD50	93.0322	1e-05
Pt218	MEL	3.35e-06	7.19304e-07	39.7387	5e-05
Pt218	NU-7441	No LD50	5.46635e-06	92.2249	1e-05
Pt218	PALB	No LD50	No LD50	93.9741	1e-05
Pt218	PANO	7.61e-09	2.24199e-09	50.6923	5e-08
Pt218	POM	8.03e-06	1.755e-06	80.3309	1e-05
Pt218	R406	2.4e-06	1.37032e-07	66.205	1e-05
Pt218	RUXO	8.09e-08	3.23458e-08	52.0931	1e-05
Pt218	SILMI	9.05e-06	2.37521e-06	82.3304	1e-05
Pt218	TAI-1	No LD50	3.40043e-06	86.4412	1e-05
Pt218	THZ1	1.83e-07	6.42279e-08	22.4032	1e-05
Pt218	VOLA	3.38e-06	1.04443e-07	62.9674	1e-05
Pt219	VEN	No LD50	3.8562e-06	83.1337	1e-05
Pt219	BTZ	5.21e-09	1.87273e-09	60.5642	5e-08
Pt219	CFZ	2.15e-08	8.03637e-09	72.1318	5e-08
Pt219	CPD22	1.37e-06	1.10997e-06	49.5455	1e-05
Pt219	DARA	No LD50	No LD50	94.6592	7e-06
Pt219	DEX	No LD50	No LD50	89.582	1e-05
Pt219	DINA	1.66e-08	3.90545e-09	49.0056	1e-07
Pt219	DOX	8.43e-07	3.47164e-07	63.2469	5e-06
Pt219	INK128	8.79e-08	3.51764e-08	61.9619	1e-05
Pt219	IXA	No LD50	4.91312e-08	85.9566	5e-08
Pt219	JNK-IN-8	No LD50	9.9017e-06	87.997	1e-05
Pt219	LEN	No LD50	5.21422e-06	89.5099	1e-05
Pt219	39621	No LD50	No LD50	87.3438	1e-05
Pt219	MEL	2.91e-05	2.69888e-06	66.4995	5e-05
Pt219	NU-7441	No LD50	7.94752e-06	92.188	1e-05
Pt219	PALB	No LD50	4.27171e-06	89.3865	1e-05
Pt219	PANO	3.5e-08	1.86593e-09	71.703	5e-08
Pt219	POM	No LD50	No LD50	93.1832	1e-05
Pt219	R406	No LD50	3.16842e-06	85.0865	1e-05
Pt219	RUXO	No LD50	3.19363e-07	83.175	1e-05
Pt219	SILMI	No LD50	6.48183e-06	91.8518	1e-05
Pt219	TAI-1	No LD50	9.92617e-06	83.8779	1e-05
Pt219	THZ1	1.03e-06	1.76833e-07	44.8362	1e-05
Pt219	VOLA	2.52e-06	1.45944e-07	67.9606	1e-05
Pt219	BTZ	1.42e-08	3.08133e-09	71.5286	5e-08
Pt219	CFZ	1.86e-08	7.01075e-09	73.7465	5e-08
Pt219	PANO	No LD50	8.29436e-09	79.7986	5e-08
Pt219	POM	No LD50	No LD50	96.2591	1e-05
Pt22	BTZ	4.73e-08	7.25973e-09	76.1146	5e-08
Pt22	MEL	No LD50	1.90223e-05	82.2519	5e-05
Pt220	VEN	No LD50	No LD50	94.2779	1e-05
Pt220	BTZ	1.63e-08	4.55252e-09	68.0961	5e-08
Pt220	CFZ	4.36e-08	2.59972e-08	87.9675	5e-08
Pt220	CPD22	2.82e-06	1.56193e-06	44.4657	1e-05
Pt220	DARA	No LD50	No LD50	95.0864	7e-06
Pt220	DEX	No LD50	No LD50	88.5312	1e-05
Pt220	DINA	1.84e-08	1.19184e-08	54.9554	1e-07
Pt220	DOX	7.11e-07	4.95395e-07	50.4411	5e-06
Pt220	INK128	8.76e-08	3.50371e-08	50.8567	1e-05
Pt220	IXA	No LD50	2.13347e-08	89.7064	5e-08
Pt220	JNK-IN-8	7.44e-06	4.11091e-06	84.0257	1e-05
Pt220	LEN	No LD50	No LD50	97.568	1e-05
Pt220	39621	No LD50	No LD50	98.2027	1e-05
Pt220	MEL	No LD50	1.8951e-05	80.9675	5e-05
Pt220	NU-7441	No LD50	No LD50	96.7861	1e-05
Pt220	PALB	No LD50	8.55875e-06	93.5067	1e-05
Pt220	PANO	No LD50	1.42046e-08	84.1878	5e-08
Pt220	POM	No LD50	No LD50	90.9442	1e-05
Pt220	R406	6.02e-06	6.62399e-07	70.1183	1e-05
Pt220	RUXO	No LD50	No LD50	92.5513	1e-05
Pt220	SILMI	No LD50	5.12857e-06	90.6297	1e-05
Pt220	TAI-1	No LD50	No LD50	96.6376	1e-05
Pt220	THZ1	4.12e-07	1.61307e-07	33.8193	1e-05
Pt220	VOLA	4.65e-06	1.80984e-06	69.4884	1e-05
Pt222	VEN	No LD50	No LD50	100	1e-05
Pt222	BTZ	1.34e-08	1.08494e-09	60.5293	5e-08
Pt222	CFZ	2.75e-08	9.56811e-10	70.9406	5e-08
Pt222	CPD22	1.86e-06	1.64262e-06	41.7319	1e-05
Pt222	DARA	No LD50	No LD50	100	7e-06
Pt222	DEX	No LD50	No LD50	95.6541	1e-05
Pt222	DINA	1.34e-08	4.95625e-09	41.2737	1e-07
Pt222	DOX	4.01e-07	9.05921e-08	41.4794	5e-06
Pt222	INK128	3.1e-07	4.52321e-08	57.9572	1e-05
Pt222	IXA	No LD50	9.8233e-09	82.9073	5e-08
Pt222	JNK-IN-8	6.3e-06	3.36511e-06	78.4974	1e-05
Pt222	LEN	No LD50	No LD50	98.1139	1e-05
Pt222	39621	No LD50	No LD50	93.8317	1e-05
Pt222	MEL	No LD50	2.70715e-05	90.7523	5e-05
Pt222	NU-7441	No LD50	6.1693e-06	91.3905	1e-05
Pt222	PALB	No LD50	4.39789e-06	88.2609	1e-05
Pt222	PANO	No LD50	9.39103e-09	83.0334	5e-08
Pt222	POM	No LD50	No LD50	95.8051	1e-05
Pt222	R406	8.57e-06	1.14283e-06	76.0624	1e-05
Pt222	RUXO	No LD50	2.07044e-06	83.7651	1e-05
Pt222	SILMI	No LD50	6.92596e-06	94.5685	1e-05
Pt222	TAI-1	No LD50	No LD50	98.6099	1e-05
Pt222	THZ1	2.83e-07	1.22342e-07	32.8121	1e-05
Pt222	VOLA	4.55e-06	2.41196e-07	65.5328	1e-05
Pt223	VEN	No LD50	No LD50	99.252	1e-05
Pt223	BTZ	1.84e-09	1.00274e-09	49.2614	5e-08
Pt223	CFZ	1.97e-09	8.31656e-10	52.9159	5e-08
Pt223	CPD22	3.18e-06	3.01556e-06	42.4626	1e-05
Pt223	DARA	No LD50	No LD50	100	7e-06
Pt223	DEX	No LD50	9.07879e-08	78.9463	1e-05
Pt223	DINA	1.77e-08	1.05499e-08	63.9381	1e-07
Pt223	DOX	6.84e-07	1.78184e-07	60.941	5e-06
Pt223	INK128	6.79e-06	4.53157e-08	76.8684	1e-05
Pt223	IXA	2.85e-08	1.51281e-08	77.6938	5e-08
Pt223	JNK-IN-8	6.65e-06	1.70177e-06	80.7776	1e-05
Pt223	LEN	No LD50	No LD50	95.8659	1e-05
Pt223	39621	No LD50	No LD50	99.2527	1e-05
Pt223	MEL	1.89e-05	1.59683e-05	75.4162	5e-05
Pt223	NU-7441	No LD50	No LD50	98.852	1e-05
Pt223	PALB	No LD50	6.5809e-06	90.6883	1e-05
Pt223	PANO	2.78e-08	1.60018e-08	85.164	5e-08
Pt223	POM	No LD50	No LD50	92.127	1e-05
Pt223	R406	No LD50	4.15718e-06	89.6591	1e-05
Pt223	RUXO	No LD50	2.93487e-06	90.6377	1e-05
Pt223	SILMI	No LD50	7.1021e-06	94.2244	1e-05
Pt223	TAI-1	No LD50	7.83487e-06	95.4659	1e-05
Pt223	THZ1	3.62e-07	1.81217e-07	51.6505	1e-05
Pt223	VOLA	6.11e-06	4.08164e-07	81.3744	1e-05
Pt224	VEN	No LD50	4.71433e-06	84.2591	1e-05
Pt224	BTZ	1.66e-09	5.16318e-10	45.5798	5e-08
Pt224	CFZ	3.26e-09	7.24954e-10	50.7373	5e-08
Pt224	CPD22	3e-06	2.49026e-06	40.0599	1e-05
Pt224	DARA	No LD50	No LD50	99.2277	7e-06
Pt224	DEX	No LD50	1.86096e-06	86.5961	1e-05
Pt224	DINA	6.95e-09	3.25583e-09	42.1829	1e-07
Pt224	DOX	4.46e-07	7.96276e-08	46.6407	5e-06
Pt224	INK128	6.66e-08	2.66412e-08	39.2066	1e-05
Pt224	IXA	1.93e-08	1.34901e-08	71.2838	5e-08
Pt224	JNK-IN-8	7.17e-06	3.63216e-06	77.6263	1e-05
Pt224	LEN	7.84e-06	3.85536e-07	81.985	1e-05
Pt224	39621	No LD50	No LD50	89.078	1e-05
Pt224	MEL	5.87e-07	2.13374e-07	31.9999	5e-05
Pt224	NU-7441	No LD50	6.08506e-06	90.534	1e-05
Pt224	PALB	No LD50	4.75815e-06	84.372	1e-05
Pt224	PANO	2.15e-08	6.5388e-09	77.0195	5e-08
Pt224	POM	No LD50	8.94297e-08	86.0241	1e-05
Pt224	R406	No LD50	1.11745e-06	81.1789	1e-05
Pt224	RUXO	No LD50	9.99066e-08	74.6822	1e-05
Pt224	SILMI	No LD50	2.28076e-06	85.2197	1e-05
Pt224	TAI-1	No LD50	1.13805e-06	78.8777	1e-05
Pt224	THZ1	2.1e-07	1.14614e-07	33.0884	1e-05
Pt224	VOLA	3.91e-06	2.58462e-06	65.6985	1e-05
Pt226	VEN	No LD50	No LD50	95.4664	1e-05
Pt226	BTZ	5.8e-09	1.44193e-09	65.4486	5e-08
Pt226	CFZ	1.77e-08	3.71464e-09	73.1784	5e-08
Pt226	CPD22	2.61e-06	2.38285e-06	43.4618	1e-05
Pt226	DARA	No LD50	No LD50	95.3363	7e-06
Pt226	DEX	No LD50	No LD50	88.9559	1e-05
Pt226	DINA	1.18e-08	2.57177e-09	44.5389	1e-07
Pt226	DOX	5.84e-07	3.33208e-07	53.7341	5e-06
Pt226	INK128	8.03e-08	3.21077e-08	48.7766	1e-05
Pt226	IXA	3.83e-08	2.23589e-08	84.0291	5e-08
Pt226	JNK-IN-8	4.8e-06	1.52983e-07	67.7222	1e-05
Pt226	LEN	No LD50	No LD50	96.3766	1e-05
Pt226	39621	No LD50	9.72542e-08	88.9852	1e-05
Pt226	MEL	2.71e-05	2.49916e-06	62.8794	5e-05
Pt226	NU-7441	No LD50	7.96878e-06	91.2764	1e-05
Pt226	PALB	9.33e-06	5.06122e-06	81.1115	1e-05
Pt226	PANO	3.24e-08	1.48441e-08	79.2092	5e-08
Pt226	POM	No LD50	No LD50	97.2243	1e-05
Pt226	R406	9.23e-06	4.56279e-07	75.169	1e-05
Pt226	RUXO	No LD50	4.81034e-07	83.93	1e-05
Pt226	SILMI	No LD50	3.34195e-06	82.0783	1e-05
Pt226	TAI-1	No LD50	1.43008e-06	88.9656	1e-05
Pt226	THZ1	8.34e-08	3.33582e-08	35.0206	1e-05
Pt226	VOLA	3.5e-06	8.26321e-08	57.9365	1e-05
Pt227	VEN	No LD50	No LD50	96.2389	1e-05
Pt227	BTZ	6.55e-09	2.34089e-09	52.5833	5e-08
Pt227	CFZ	1.24e-08	2.04273e-09	54.0833	5e-08
Pt227	DARA	No LD50	No LD50	100	7e-06
Pt227	DEX	No LD50	6.80619e-08	84.6161	1e-05
Pt227	DOX	2.37e-07	6.20958e-08	34.5648	5e-06
Pt227	IXA	2.82e-08	5.25795e-09	74.4978	5e-08
Pt227	LEN	No LD50	5.79326e-07	82.5509	1e-05
Pt227	MEL	3.67e-06	2.34313e-07	46.5189	5e-05
Pt227	PANO	3.18e-08	9.89879e-09	78.2492	5e-08
Pt227	POM	No LD50	8.91549e-07	86.009	1e-05
Pt229	VEN	4.22e-06	7.6843e-08	66.7043	1e-05
Pt229	BTZ	4.39e-09	1.33981e-09	29.2238	5e-08
Pt229	CFZ	9.35e-10	2.49359e-10	29.4856	5e-08
Pt229	CPD22	2.66e-06	2.50811e-06	36.2009	1e-05
Pt229	DARA	No LD50	No LD50	100	7e-06
Pt229	DEX	2.63e-06	6.29572e-08	65.7571	1e-05
Pt229	DINA	8.67e-09	5.614e-10	24.7489	1e-07
Pt229	DOX	1.73e-07	6.15102e-08	26.1212	5e-06
Pt229	INK128	5.85e-08	2.33909e-08	33.9524	1e-05
Pt229	IXA	1.74e-08	2.36334e-10	55.0486	5e-08
Pt229	JNK-IN-8	2.93e-06	5.71955e-07	52.8341	1e-05
Pt229	LEN	3.38e-06	5.91397e-08	60.7087	1e-05
Pt229	39621	No LD50	7.37718e-08	74.6221	1e-05
Pt229	MEL	7.32e-06	2.50278e-07	35.6428	5e-05
Pt229	NU-7441	1.51e-06	6.33605e-08	54.1001	1e-05
Pt229	PALB	4.08e-06	1.60951e-06	62.481	1e-05
Pt229	PANO	1.86e-08	9.98083e-10	61.909	5e-08
Pt229	POM	4.63e-06	2.76465e-07	68.1444	1e-05
Pt229	R406	2.82e-07	5.37798e-08	41.8299	1e-05
Pt229	RUXO	5.18e-06	4.36043e-08	64.8976	1e-05
Pt229	SILMI	2.49e-07	4.30556e-08	54.6419	1e-05
Pt229	TAI-1	No LD50	7.32381e-08	68.0494	1e-05
Pt229	THZ1	6.8e-08	2.72115e-08	12.5681	1e-05
Pt229	VOLA	7.74e-08	3.09574e-08	33.1935	1e-05
Pt230	VEN	No LD50	2.15771e-06	85.9748	1e-05
Pt230	BTZ	3.24e-09	8.57263e-10	55.5262	5e-08
Pt230	CFZ	2.41e-08	8.33849e-09	80.1527	5e-08
Pt230	CPD22	3.31e-06	2.50226e-06	52.4264	1e-05
Pt230	DARA	No LD50	No LD50	100	7e-06
Pt230	DEX	No LD50	No LD50	86.1738	1e-05
Pt230	DINA	1.65e-08	4.87816e-09	49.1012	1e-07
Pt230	DOX	8.37e-07	2.31411e-07	59.3007	5e-06
Pt230	INK128	9.88e-06	4.19804e-08	72.7325	1e-05
Pt230	IXA	2.19e-08	9.90074e-09	73.944	5e-08
Pt230	JNK-IN-8	No LD50	No LD50	96.5351	1e-05
Pt230	LEN	No LD50	No LD50	94.0437	1e-05
Pt230	39621	No LD50	No LD50	93.9135	1e-05
Pt230	MEL	1.78e-05	8.74611e-07	48.7035	5e-05
Pt230	NU-7441	No LD50	No LD50	91.7594	1e-05
Pt230	PALB	No LD50	8.02733e-06	92.9297	1e-05
Pt230	PANO	4.09e-08	1.4562e-08	81.6236	5e-08
Pt230	POM	No LD50	No LD50	99.9455	1e-05
Pt230	R406	No LD50	4.11097e-07	78.6127	1e-05
Pt230	RUXO	No LD50	No LD50	92.8277	1e-05
Pt230	SILMI	No LD50	3.67422e-06	85.6454	1e-05
Pt230	TAI-1	No LD50	No LD50	99.9828	1e-05
Pt230	THZ1	8.78e-07	4.43477e-07	44.3873	1e-05
Pt230	VOLA	4.5e-06	2.74291e-07	68.8775	1e-05
Pt235	VEN	4.6e-07	3.28197e-07	31.3597	1e-05
Pt235	BTZ	3.16e-09	6.47705e-10	45.4569	5e-08
Pt235	CFZ	1.22e-08	1.67205e-09	52.4344	5e-08
Pt235	CPD22	1.75e-06	1.37769e-06	39.7007	1e-05
Pt235	DARA	No LD50	No LD50	97.7211	7e-06
Pt235	DEX	No LD50	No LD50	95.7026	1e-05
Pt235	DINA	1.67e-08	1.10411e-08	46.7145	1e-07
Pt235	DOX	3.97e-07	1.76831e-07	48.4173	5e-06
Pt235	INK128	6.85e-06	6.08394e-08	66.0219	1e-05
Pt235	IXA	2.32e-08	6.64809e-09	65.5441	5e-08
Pt235	JNK-IN-8	5.25e-06	2.46053e-06	75.2303	1e-05
Pt235	LEN	No LD50	No LD50	100	1e-05
Pt235	39621	No LD50	No LD50	100	1e-05
Pt235	MEL	4.37e-06	6.18962e-07	42.0082	5e-05
Pt235	NU-7441	No LD50	No LD50	96.422	1e-05
Pt235	PALB	No LD50	3.8468e-06	81.5917	1e-05
Pt235	PANO	2.82e-08	1.00919e-08	77.7527	5e-08
Pt235	POM	No LD50	No LD50	100	1e-05
Pt235	R406	No LD50	1.44023e-06	82.8919	1e-05
Pt235	RUXO	No LD50	No LD50	94.6375	1e-05
Pt235	SILMI	No LD50	6.30265e-06	90.6112	1e-05
Pt235	TAI-1	No LD50	No LD50	91.7496	1e-05
Pt235	THZ1	3.81e-07	1.24413e-07	33.3202	1e-05
Pt235	VOLA	9.27e-06	1.77963e-07	77.6104	1e-05
Pt235	BTZ	2.36e-08	4.43443e-09	64.3865	5e-08
Pt235	CFZ	8.4e-09	4.10622e-10	47.9095	5e-08
Pt235	PANO	4.94e-08	1.03848e-08	76.8669	5e-08
Pt235	POM	No LD50	No LD50	100	1e-05
Pt236	VEN	No LD50	1.20959e-06	79.4157	1e-05
Pt236	BTZ	1.24e-08	2.14773e-09	67.1282	5e-08
Pt236	CFZ	1.08e-08	2.63078e-09	65.7208	5e-08
Pt236	CPD22	2.57e-06	1.70701e-06	45.1563	1e-05
Pt236	DARA	No LD50	No LD50	94.8532	7e-06
Pt236	DEX	No LD50	5.5671e-06	88.8117	1e-05
Pt236	DINA	1.28e-08	8.52198e-09	40.6065	1e-07
Pt236	DOX	5.64e-07	2.68575e-07	43.9925	5e-06
Pt236	INK128	2.02e-07	4.27648e-08	64.1571	1e-05
Pt236	IXA	2.99e-08	1.96598e-08	86.9335	5e-08
Pt236	JNK-IN-8	5.65e-06	1.67143e-06	75.3513	1e-05
Pt236	LEN	No LD50	No LD50	91.4733	1e-05
Pt236	39621	No LD50	No LD50	94.1698	1e-05
Pt236	MEL	8.22e-07	2.24396e-07	37.5294	5e-05
Pt236	NU-7441	No LD50	3.78807e-06	89.0108	1e-05
Pt236	PALB	No LD50	5.39774e-06	91.04	1e-05
Pt236	PANO	1.42e-08	5.84265e-09	64.306	5e-08
Pt236	POM	No LD50	9.12201e-06	92.7687	1e-05
Pt236	R406	No LD50	6.88584e-07	84.5863	1e-05
Pt236	RUXO	No LD50	1.44261e-06	83.3072	1e-05
Pt236	SILMI	No LD50	No LD50	94.0729	1e-05
Pt236	TAI-1	No LD50	No LD50	94.9049	1e-05
Pt236	THZ1	3.87e-07	3.16864e-07	30.0834	1e-05
Pt236	VOLA	3.77e-06	3.33961e-06	67.0858	1e-05
Pt236	CFZ	1.29e-08	3.2291e-09	70.468	5e-08
Pt236	CPD22	5.4e-06	2.08536e-06	74.0991	1e-05
Pt236	DINA	9.75e-09	6.43506e-09	33.4906	1e-07
Pt236	JNK-IN-8	8.39e-06	2.256e-06	80.901	1e-05
Pt236	39621	No LD50	No LD50	97.417	1e-05
Pt236	NU-7441	No LD50	7.00864e-07	81.7029	1e-05
Pt236	POM	No LD50	No LD50	99.0588	1e-05
Pt236	PYR	8.55e-07	5.33852e-08	63.9496	1e-05
Pt236	R406	No LD50	No LD50	87.4286	1e-05
Pt236	TAI-1	No LD50	No LD50	100	1e-05
Pt237	BTZ	4.67e-10	1.86987e-10	38.0443	5e-08
Pt237	CFZ	1.84e-09	6.60027e-10	39.5887	5e-08
Pt237	PANO	1.33e-08	4.49333e-09	72.9244	5e-08
Pt237	POM	No LD50	No LD50	100	1e-05
Pt238	VEN	No LD50	8.37684e-06	87.8096	1e-05
Pt238	BTZ	3.53e-09	3.50258e-10	46.142	5e-08
Pt238	CFZ	8.57e-09	2.43211e-09	60.1397	5e-08
Pt238	CPD22	2.16e-06	1.90318e-06	39.6443	1e-05
Pt238	DARA	No LD50	No LD50	96.7266	7e-06
Pt238	DEX	1.03e-06	4.47145e-08	62.1306	1e-05
Pt238	DINA	2.65e-09	8.29763e-10	26.4931	1e-07
Pt238	DOX	4.55e-07	1.39709e-07	39.0718	5e-06
Pt238	INK128	5.81e-08	2.32548e-08	35.9354	1e-05
Pt238	IXA	1.3e-08	6.55967e-09	61.5879	5e-08
Pt238	JNK-IN-8	2.3e-06	9.3714e-08	65.0859	1e-05
Pt238	LEN	No LD50	7.51162e-08	80.3486	1e-05
Pt238	39621	No LD50	8.29232e-08	86.6428	1e-05
Pt238	MEL	9e-07	2.38709e-07	40.5362	5e-05
Pt238	NU-7441	No LD50	1.95585e-07	82.4198	1e-05
Pt238	PALB	No LD50	8.51301e-08	79.7339	1e-05
Pt238	PANO	1.05e-08	3.3745e-09	61.8502	5e-08
Pt238	POM	No LD50	7.06136e-08	79.4449	1e-05
Pt238	R406	6.52e-06	5.15039e-07	73.3864	1e-05
Pt238	RUXO	4.65e-07	4.93048e-08	58.7626	1e-05
Pt238	SILMI	8.01e-06	6.49229e-07	75.0349	1e-05
Pt238	TAI-1	8.38e-06	3.01157e-06	81.2244	1e-05
Pt238	THZ1	8.54e-08	3.41518e-08	20.5992	1e-05
Pt238	VOLA	9.02e-07	7.47708e-08	52.1918	1e-05
Pt239	CFZ	1.65e-08	5.57724e-09	68.8043	5e-08
Pt239	CPD22	2.29e-06	1.68118e-06	51.5139	1e-05
Pt239	DINA	1.44e-08	8.70102e-09	46.924	1e-07
Pt239	JNK-IN-8	6.83e-06	4.33696e-06	80.0444	1e-05
Pt239	39621	No LD50	No LD50	91.4684	1e-05
Pt239	NU-7441	No LD50	4.69773e-06	81.1024	1e-05
Pt239	POM	No LD50	No LD50	99.3596	1e-05
Pt239	PYR	1.5e-06	7.31542e-08	54.7668	1e-05
Pt239	R406	No LD50	9.28484e-07	75.5697	1e-05
Pt239	TAI-1	No LD50	No LD50	98.0013	1e-05
Pt24	BTZ	6.6e-09	3.3034e-10	60.1018	5e-08
Pt24	CFZ	7.82e-09	2.80985e-10	55.496	5e-08
Pt24	DEX	No LD50	7.51004e-08	85.1395	1e-05
Pt24	DOX	2.78e-08	1.11035e-08	31.1953	5e-06
Pt24	LEN	No LD50	No LD50	99.8663	1e-05
Pt24	MEL	No LD50	5.98954e-06	81.9737	5e-05
Pt24	POM	No LD50	9.16801e-06	91.7206	1e-05
Pt242	VEN	6.43e-06	8.02436e-07	72.8711	1e-05
Pt242	BTZ	1.42e-09	2.78616e-10	38.7919	5e-08
Pt242	CFZ	2.81e-09	6.49144e-10	47.115	5e-08
Pt242	CPD22	2.65e-06	2.13978e-06	50.2105	1e-05
Pt242	DARA	No LD50	No LD50	100	7e-06
Pt242	DEX	No LD50	No LD50	92.027	1e-05
Pt242	DINA	7.83e-09	1.11324e-09	35.1949	1e-07
Pt242	DOX	3.09e-07	7.36778e-08	37.3613	5e-06
Pt242	INK128	No LD50	4.91556e-08	75.6184	1e-05
Pt242	IXA	1.62e-08	3.91934e-09	65.4067	5e-08
Pt242	JNK-IN-8	3.45e-06	1.31446e-06	64.48	1e-05
Pt242	LEN	No LD50	No LD50	94.5094	1e-05
Pt242	39621	No LD50	No LD50	90.8889	1e-05
Pt242	MEL	5.09e-06	2.91124e-07	29.6941	5e-05
Pt242	NU-7441	No LD50	9.6195e-06	91.7196	1e-05
Pt242	PALB	No LD50	6.8353e-06	84.3185	1e-05
Pt242	PANO	2.39e-08	6.81362e-09	68.1404	5e-08
Pt242	POM	No LD50	No LD50	91.9983	1e-05
Pt242	R406	3.01e-06	9.94549e-08	68.8451	1e-05
Pt242	RUXO	No LD50	No LD50	90.1951	1e-05
Pt242	SILMI	No LD50	3.43865e-06	85.6746	1e-05
Pt242	TAI-1	No LD50	No LD50	96.0438	1e-05
Pt242	THZ1	2.34e-07	7.49103e-08	30.5342	1e-05
Pt242	VOLA	3.44e-06	3.41649e-07	62.5916	1e-05
Pt244	CFZ	2.96e-08	5.59698e-09	75.226	5e-08
Pt244	CPD22	2.02e-06	1.37949e-06	51.819	1e-05
Pt244	DINA	6.16e-09	9.5108e-10	52.6261	1e-07
Pt244	JNK-IN-8	5.72e-06	2.98693e-06	72.7378	1e-05
Pt244	39621	No LD50	No LD50	88.6562	1e-05
Pt244	NU-7441	No LD50	1.23243e-07	77.8441	1e-05
Pt244	POM	No LD50	No LD50	94.9559	1e-05
Pt244	PYR	1.43e-06	8.54021e-08	56.9246	1e-05
Pt244	R406	2.91e-06	1.87758e-07	66.8218	1e-05
Pt244	TAI-1	No LD50	No LD50	97.731	1e-05
Pt246	CFZ	1.14e-08	2.34021e-09	63.3658	5e-08
Pt246	CPD22	1.76e-06	1.26315e-06	44.7962	1e-05
Pt246	DINA	6.78e-09	4.18124e-09	42.9696	1e-07
Pt246	JNK-IN-8	8.05e-06	3.86531e-06	80.2967	1e-05
Pt246	39621	No LD50	No LD50	96.084	1e-05
Pt246	NU-7441	No LD50	2.75955e-06	81.0675	1e-05
Pt246	POM	No LD50	No LD50	87.9597	1e-05
Pt246	PYR	2.29e-07	4.26089e-08	58.1847	1e-05
Pt246	R406	No LD50	3.89959e-07	78.0706	1e-05
Pt246	TAI-1	No LD50	8.76991e-06	89.6878	1e-05
Pt247	CFZ	1.18e-09	7.05669e-10	33.7673	5e-08
Pt247	CPD22	3.35e-06	2.95586e-06	50.8906	1e-05
Pt247	DINA	4.4e-09	3.41842e-09	21.1117	1e-07
Pt247	JNK-IN-8	4.32e-06	2.53526e-06	70.7138	1e-05
Pt247	39621	No LD50	No LD50	98.9716	1e-05
Pt247	NU-7441	8.78e-06	3.50118e-06	81.2505	1e-05
Pt247	POM	No LD50	5.95121e-08	81.4032	1e-05
Pt247	PYR	6.22e-08	2.48893e-08	35.9791	1e-05
Pt247	R406	No LD50	5.60584e-07	81.2861	1e-05
Pt247	TAI-1	1.13e-06	4.07508e-07	56.615	1e-05
Pt247	VOLA	4.05e-07	5.70134e-08	52.4169	1e-05
Pt248	BTZ	1.38e-09	5.15656e-10	47.164	5e-08
Pt248	CFZ	2.42e-09	8.27982e-10	49.1629	5e-08
Pt248	PANO	8.13e-09	4.76221e-09	60.8918	5e-08
Pt248	POM	No LD50	No LD50	96.3401	1e-05
Pt249	BTZ	6.89e-09	3.15218e-09	52.9964	5e-08
Pt249	CFZ	1.67e-08	6.68266e-09	66.429	5e-08
Pt249	PANO	2.15e-08	6.8014e-09	74.385	5e-08
Pt249	POM	No LD50	No LD50	99.9938	1e-05
Pt249	VEN	No LD50	4.904e-06	81.316	1e-05
Pt249	BTZ	3.8e-09	1.77668e-09	49.4168	5e-08
Pt249	CFZ	8.03e-09	3.29953e-09	55.4389	5e-08
Pt249	DARA	No LD50	No LD50	89.214	7e-06
Pt249	DEX	No LD50	8.18284e-08	82.3978	1e-05
Pt249	DOX	4.04e-07	1.28836e-07	40.3139	5e-06
Pt249	IXA	4.12e-08	2.40082e-08	83.0021	5e-08
Pt249	LEN	No LD50	No LD50	100	1e-05
Pt249	MEL	4.55e-06	7.72033e-07	33.2449	5e-05
Pt249	PANO	2.68e-08	8.42307e-09	75.8625	5e-08
Pt249	POM	No LD50	No LD50	94.3368	1e-05
Pt249	SILMI	No LD50	7.0083e-06	92.5724	1e-05
Pt249	VOLA	4.74e-06	1.3622e-06	70.7092	1e-05
Pt249	CFZ	8.71e-09	3.45317e-09	57.1725	5e-08
Pt249	CPD22	3.02e-06	2.39213e-06	53.1749	1e-05
Pt249	DINA	1.26e-08	7.78021e-09	38.2727	1e-07
Pt249	JNK-IN-8	No LD50	No LD50	89.4944	1e-05
Pt249	39621	No LD50	No LD50	95.7701	1e-05
Pt249	NU-7441	No LD50	1.79972e-06	83.2139	1e-05
Pt249	POM	No LD50	No LD50	92.9413	1e-05
Pt249	PYR	3.28e-07	5.16514e-08	49.3434	1e-05
Pt249	R406	7.04e-06	3.49013e-07	73.9767	1e-05
Pt249	TAI-1	No LD50	No LD50	99.3125	1e-05
Pt249	VOLA	3.42e-06	3.18313e-07	59.8581	1e-05
Pt251	VEN	No LD50	6.15424e-06	87.6917	1e-05
Pt251	BTZ	1.32e-08	1.24536e-09	68.7903	5e-08
Pt251	CFZ	3.28e-08	4.93039e-10	70.0289	5e-08
Pt251	DARA	No LD50	No LD50	96.4279	7e-06
Pt251	DEX	No LD50	5.06542e-08	71.7596	1e-05
Pt251	DOX	6.58e-07	3.11607e-07	52.5432	5e-06
Pt251	IXA	No LD50	No LD50	89.714	5e-08
Pt251	LEN	No LD50	7.29447e-06	90.5635	1e-05
Pt251	MEL	9.66e-06	1.36925e-06	38.8804	5e-05
Pt251	PANO	No LD50	4.85956e-10	77.3136	5e-08
Pt251	POM	No LD50	No LD50	92.9327	1e-05
Pt251	SILMI	5.32e-06	4.7655e-07	70.6907	1e-05
Pt251	VOLA	4.95e-06	1.97246e-06	68.0904	1e-05
Pt252	VEN	No LD50	No LD50	99.4137	1e-05
Pt252	BTZ	1.75e-09	7.32016e-10	40.4049	5e-08
Pt252	CFZ	2.81e-09	1.32277e-09	42.6935	5e-08
Pt252	DARA	No LD50	No LD50	100	7e-06
Pt252	DEX	No LD50	No LD50	97.6762	1e-05
Pt252	DOX	2.93e-07	6.5877e-08	40.6599	5e-06
Pt252	IXA	1.94e-08	1.16999e-08	69.3261	5e-08
Pt252	LEN	No LD50	No LD50	100	1e-05
Pt252	MEL	3.53e-07	1.41002e-07	20.7035	5e-05
Pt252	PANO	4.59e-09	1.81521e-09	48.1949	5e-08
Pt252	POM	No LD50	3.33314e-07	84.7172	1e-05
Pt252	SILMI	8.33e-06	4.3229e-06	87.2209	1e-05
Pt252	VOLA	1.44e-06	1.69874e-07	59.1913	1e-05
Pt253	VEN	6.8e-06	1.06832e-06	78.3703	1e-05
Pt253	BTZ	5.79e-09	2.08677e-09	64.1005	5e-08
Pt253	CFZ	1.15e-08	4.11199e-09	64.6171	5e-08
Pt253	DARA	No LD50	No LD50	97.1556	7e-06
Pt253	DEX	No LD50	No LD50	98.1375	1e-05
Pt253	DOX	5.35e-07	2.19767e-07	46.3788	5e-06
Pt253	IXA	No LD50	2.40326e-08	87.1371	5e-08
Pt253	LEN	No LD50	No LD50	100	1e-05
Pt253	MEL	3.96e-06	2.88095e-07	39.1426	5e-05
Pt253	PANO	2.62e-08	3.20259e-09	73.5089	5e-08
Pt253	POM	No LD50	No LD50	100	1e-05
Pt253	SILMI	No LD50	No LD50	95.0728	1e-05
Pt253	VOLA	No LD50	No LD50	93.1355	1e-05
Pt254	BTZ	5.27e-09	2.73711e-09	50.1636	5e-08
Pt254	CFZ	1.22e-08	5.95092e-09	59.8093	5e-08
Pt254	PANO	2.95e-08	1.0948e-08	74.3332	5e-08
Pt254	POM	No LD50	No LD50	94.1764	1e-05
Pt254	VEN	No LD50	No LD50	92.7321	1e-05
Pt254	BTZ	2.41e-09	6.34327e-10	40.6637	5e-08
Pt254	CFZ	5.96e-09	1.17204e-09	48.8745	5e-08
Pt254	DARA	No LD50	No LD50	90.6386	7e-06
Pt254	DEX	No LD50	8.37632e-08	79.3779	1e-05
Pt254	DOX	2.02e-07	4.54289e-08	31.0232	5e-06
Pt254	IXA	1.76e-08	9.02895e-09	63.9434	5e-08
Pt254	LEN	No LD50	No LD50	90.7639	1e-05
Pt254	MEL	3.78e-07	1.5115e-07	27.9776	5e-05
Pt254	PANO	1.93e-08	6.40625e-09	68.2887	5e-08
Pt254	POM	No LD50	9.00044e-08	84.2447	1e-05
Pt254	SILMI	3.37e-06	2.18258e-07	54.7909	1e-05
Pt254	VOLA	3.35e-06	1.02e-06	50.9089	1e-05
Pt254	CFZ	6.01e-09	1.89905e-09	49.595	5e-08
Pt254	CPD22	1.57e-06	9.24425e-07	36.5563	1e-05
Pt254	DINA	1.44e-08	1.00338e-08	36.4502	1e-07
Pt254	JNK-IN-8	6.65e-06	3.33946e-06	73.8432	1e-05
Pt254	39621	No LD50	No LD50	99.4707	1e-05
Pt254	NU-7441	No LD50	No LD50	93.2091	1e-05
Pt254	POM	No LD50	No LD50	94.5601	1e-05
Pt254	PYR	9.11e-08	3.64532e-08	43.9113	1e-05
Pt254	R406	No LD50	3.45397e-06	82.3568	1e-05
Pt254	TAI-1	7.54e-06	6.6544e-07	75.087	1e-05
Pt254	VOLA	3.34e-06	1.28638e-06	51.6958	1e-05
Pt255	BTZ	3.26e-09	1.75233e-09	53.192	5e-08
Pt255	CFZ	3.56e-08	1.9071e-08	88.1464	5e-08
Pt255	PANO	No LD50	2.24488e-08	91.6201	5e-08
Pt255	POM	No LD50	No LD50	100	1e-05
Pt255	VEN	2.16e-06	6.7235e-08	59.7425	1e-05
Pt255	BTZ	1.06e-09	2.88706e-10	44.88	5e-08
Pt255	CFZ	2.59e-08	1.47227e-08	80.7226	5e-08
Pt255	DARA	No LD50	No LD50	94.6617	7e-06
Pt255	DEX	No LD50	No LD50	88.5778	1e-05
Pt255	DOX	1.9e-06	3.3523e-07	71.0622	5e-06
Pt255	IXA	1.98e-08	7.4117e-09	70.4792	5e-08
Pt255	LEN	No LD50	No LD50	98.7906	1e-05
Pt255	MEL	6.31e-06	2.19584e-07	32.8077	5e-05
Pt255	PANO	4.27e-08	2.01405e-08	87.826	5e-08
Pt255	POM	No LD50	No LD50	97.8793	1e-05
Pt255	SILMI	No LD50	1.78305e-06	81.0024	1e-05
Pt255	VOLA	No LD50	3.17357e-06	87.3117	1e-05
Pt256	BTZ	3.85e-09	1.96914e-09	49.63	5e-08
Pt256	CFZ	4.49e-09	2.64425e-09	49.7079	5e-08
Pt256	CPD22	1.62e-06	1.25983e-06	44.7952	1e-05
Pt256	DINA	1.58e-08	1.20361e-08	46.8436	1e-07
Pt256	JNK-IN-8	8.56e-06	4.72732e-06	89.9596	1e-05
Pt256	39621	No LD50	No LD50	100	1e-05
Pt256	NU-7441	No LD50	No LD50	100	1e-05
Pt256	POM	No LD50	No LD50	98.2178	1e-05
Pt256	PYR	2.59e-06	6.11185e-07	61.655	1e-05
Pt256	R406	No LD50	3.69121e-06	87.2009	1e-05
Pt256	TAI-1	No LD50	6.7593e-06	92.8537	1e-05
Pt256	VOLA	3.65e-06	3.0363e-06	60.728	1e-05
Pt256	VEN	No LD50	No LD50	93.773	1e-05
Pt256	BTZ	5.13e-09	4.55583e-10	58.1095	5e-08
Pt256	CFZ	8.62e-09	1.45897e-09	64.6284	5e-08
Pt256	DARA	No LD50	No LD50	100	7e-06
Pt256	DEX	No LD50	9.69791e-08	77.6874	1e-05
Pt256	DOX	5.84e-07	2.20519e-07	47.1269	5e-06
Pt256	IXA	2.98e-08	7.17001e-09	73.9519	5e-08
Pt256	LEN	No LD50	No LD50	97.677	1e-05
Pt256	MEL	3.81e-06	5.77914e-07	29.3956	5e-05
Pt256	PANO	3.22e-08	1.08517e-08	78.9522	5e-08
Pt256	POM	No LD50	No LD50	93.6923	1e-05
Pt256	SILMI	2.07e-06	5.2232e-07	57.5688	1e-05
Pt256	VOLA	3.12e-06	2.89303e-07	45.3448	1e-05
Pt258	BTZ	4.9e-09	2.75013e-09	67.5125	5e-08
Pt258	CFZ	1.93e-08	1.16776e-08	84.0489	5e-08
Pt258	PANO	2.87e-08	1.30755e-08	79.8739	5e-08
Pt258	POM	No LD50	1.39425e-07	84.5993	1e-05
Pt258	VEN	No LD50	No LD50	83.7456	1e-05
Pt258	BTZ	2.88e-09	1.26054e-09	61.8167	5e-08
Pt258	CFZ	8.81e-09	3.57224e-09	66.3147	5e-08
Pt258	DARA	No LD50	No LD50	99.4356	7e-06
Pt258	DEX	No LD50	4.88228e-08	82.8981	1e-05
Pt258	DOX	3.19e-07	6.76845e-08	43.1944	5e-06
Pt258	IXA	2.27e-08	1.3296e-08	83.3508	5e-08
Pt258	LEN	No LD50	1.08103e-06	85.5152	1e-05
Pt258	MEL	3.44e-07	1.37552e-07	32.8135	5e-05
Pt258	PANO	1.69e-08	7.87415e-09	71.213	5e-08
Pt258	POM	7.54e-06	5.89786e-08	74.3787	1e-05
Pt258	SILMI	4.18e-06	1.33053e-06	73.7488	1e-05
Pt258	VOLA	2.16e-06	4.07849e-07	63.3504	1e-05
Pt259	BTZ	1.06e-09	5.83018e-10	31.3379	5e-08
Pt259	CFZ	7.68e-10	2.94102e-10	30.2398	5e-08
Pt259	PANO	2.35e-08	9.08831e-09	78.3532	5e-08
Pt259	POM	No LD50	No LD50	95.1539	1e-05
Pt259	BTZ	2.48e-09	1.72509e-09	32.5636	5e-08
Pt259	CFZ	2.3e-09	1.05117e-09	29.5448	5e-08
Pt259	CPD22	4.86e-06	3.09464e-06	59.3309	1e-05
Pt259	DINA	1.93e-08	5.41526e-09	43.2174	1e-07
Pt259	JNK-IN-8	6.07e-06	3.91309e-06	78.3907	1e-05
Pt259	39621	No LD50	No LD50	93.7774	1e-05
Pt259	NU-7441	No LD50	No LD50	92.1382	1e-05
Pt259	POM	No LD50	No LD50	92.3558	1e-05
Pt259	PYR	2.44e-07	6.86221e-08	44.4966	1e-05
Pt259	R406	No LD50	9.49635e-06	86.9919	1e-05
Pt259	TAI-1	No LD50	1.59973e-06	86.7685	1e-05
Pt259	VOLA	4.26e-06	1.18151e-06	68.9677	1e-05
Pt259	VEN	No LD50	No LD50	100	1e-05
Pt259	BTZ	5.97e-10	2.1246e-10	29.8151	5e-08
Pt259	CFZ	8.27e-10	3.50449e-10	30.2646	5e-08
Pt259	DARA	No LD50	No LD50	100	7e-06
Pt259	DEX	No LD50	No LD50	100	1e-05
Pt259	DOX	8.01e-08	2.50979e-08	29.5762	5e-06
Pt259	IXA	1.2e-08	7.9987e-09	54.026	5e-08
Pt259	LEN	No LD50	No LD50	100	1e-05
Pt259	MEL	3.86e-07	1.54574e-07	35.4292	5e-05
Pt259	PANO	2.26e-08	1.11041e-08	74.7533	5e-08
Pt259	POM	No LD50	No LD50	100	1e-05
Pt259	SILMI	No LD50	5.14331e-06	89.7591	1e-05
Pt259	VOLA	3.84e-06	1.72637e-06	61.2867	1e-05
Pt263	BTZ	2.35e-09	1.34784e-09	43.9877	5e-08
Pt263	CFZ	3.72e-09	1.26947e-09	51.97	5e-08
Pt263	CPD22	2.26e-06	1.74665e-06	54.1446	1e-05
Pt263	DINA	9.3e-09	4.46283e-09	56.1595	1e-07
Pt263	JNK-IN-8	6.95e-06	1.96757e-06	79.5087	1e-05
Pt263	39621	No LD50	No LD50	94.8766	1e-05
Pt263	NU-7441	No LD50	No LD50	97.0321	1e-05
Pt263	POM	No LD50	No LD50	97.6394	1e-05
Pt263	PYR	9.08e-07	9.1331e-08	56.1479	1e-05
Pt263	R406	No LD50	9.6849e-06	86.8095	1e-05
Pt263	TAI-1	No LD50	No LD50	100	1e-05
Pt263	VOLA	4.6e-06	3.55022e-06	71.0514	1e-05
Pt264	BTZ	9.02e-10	5.15211e-10	30.7354	5e-08
Pt264	CFZ	9.87e-10	3.56417e-10	35.1568	5e-08
Pt264	DEX	No LD50	9.64151e-08	85.3802	1e-05
Pt264	LEN	No LD50	No LD50	96.5094	1e-05
Pt264	MEL	3.25e-07	1.29846e-07	20.6996	5e-05
Pt264	PANO	1.65e-08	8.6014e-09	65.3814	5e-08
Pt264	POM	No LD50	No LD50	92.9797	1e-05
Pt265	BTZ	2.47e-09	9.91661e-10	51.3303	5e-08
Pt265	CFZ	3.65e-09	9.7733e-10	55.2914	5e-08
Pt265	DEX	No LD50	No LD50	92.3843	1e-05
Pt265	LEN	No LD50	No LD50	100	1e-05
Pt265	MEL	No LD50	No LD50	100	5e-05
Pt265	PANO	No LD50	2.33699e-08	88.2914	5e-08
Pt265	POM	No LD50	No LD50	99.7925	1e-05
Pt268	BTZ	2.21e-08	7.6373e-09	75.4283	5e-08
Pt268	CFZ	4.36e-08	1.07361e-08	79.4854	5e-08
Pt268	PANO	No LD50	4.13394e-09	80.1495	5e-08
Pt268	POM	No LD50	6.35778e-06	89.3906	1e-05
Pt268	BTZ	1.1e-08	1.71353e-09	61.3078	5e-08
Pt268	CFZ	3.36e-08	6.79214e-09	73.0075	5e-08
Pt268	CPD22	2.41e-06	1.47973e-06	58.7916	1e-05
Pt268	DINA	1.64e-08	1.15156e-08	50.6298	1e-07
Pt268	JNK-IN-8	6.67e-06	4.30917e-06	83.924	1e-05
Pt268	39621	No LD50	No LD50	94.3697	1e-05
Pt268	NU-7441	No LD50	No LD50	94.1231	1e-05
Pt268	POM	No LD50	2.68643e-07	86.2075	1e-05
Pt268	PYR	2.66e-06	7.51965e-08	65.1852	1e-05
Pt268	R406	2.37e-06	9.91372e-08	65.2678	1e-05
Pt268	TAI-1	No LD50	No LD50	96.1575	1e-05
Pt268	VOLA	5.86e-06	1.05115e-06	69.7389	1e-05
Pt268	BTZ	5.24e-09	3.99532e-10	53.8155	5e-08
Pt268	CFZ	1.28e-08	4.78893e-10	60.2543	5e-08
Pt268	DEX	No LD50	6.28722e-08	76.743	1e-05
Pt268	LEN	No LD50	7.64955e-08	81.5547	1e-05
Pt268	MEL	1.04e-05	6.52862e-06	46.4566	5e-05
Pt268	PANO	4.59e-08	4.20635e-09	78.029	5e-08
Pt268	POM	No LD50	8.27908e-08	82.6811	1e-05
Pt269	BTZ	5.65e-09	3.68302e-09	40.515	5e-08
Pt269	CFZ	1.14e-08	7.05766e-09	52.9064	5e-08
Pt269	PANO	1.33e-08	5.16362e-09	58.9256	5e-08
Pt269	POM	No LD50	No LD50	100	1e-05
Pt269	BTZ	4.65e-09	2.66084e-09	48.0532	5e-08
Pt269	CFZ	1.46e-08	5.98554e-09	64.1299	5e-08
Pt269	CPD22	2.77e-06	2.23376e-06	52.7412	1e-05
Pt269	DINA	1.21e-08	6.8583e-09	32.6492	1e-07
Pt269	JNK-IN-8	5.46e-06	3.97998e-06	78.423	1e-05
Pt269	39621	No LD50	No LD50	100	1e-05
Pt269	NU-7441	No LD50	No LD50	95.4383	1e-05
Pt269	POM	No LD50	No LD50	97.5846	1e-05
Pt269	PYR	1.59e-06	5.94489e-08	53.4115	1e-05
Pt269	R406	No LD50	No LD50	91.6286	1e-05
Pt269	TAI-1	No LD50	1.45932e-06	82.5245	1e-05
Pt269	VOLA	3.07e-06	2.23405e-06	54.6143	1e-05
Pt269	BTZ	2.89e-09	2.20625e-09	29.8639	5e-08
Pt269	CFZ	6.39e-09	4.14272e-09	46.1861	5e-08
Pt269	DEX	No LD50	4.10872e-08	58.7283	1e-05
Pt269	LEN	No LD50	No LD50	100	1e-05
Pt269	MEL	6.76e-06	3.41406e-07	27.9481	5e-05
Pt269	PANO	8.49e-09	1.07541e-09	52.6303	5e-08
Pt269	POM	No LD50	No LD50	100	1e-05
Pt270	BTZ	4.25e-09	1.62664e-09	52.1054	5e-08
Pt270	CFZ	1.04e-08	2.00665e-09	63.1091	5e-08
Pt270	PANO	3.13e-08	1.34455e-08	76.519	5e-08
Pt270	POM	No LD50	No LD50	92.6727	1e-05
Pt271	BTZ	1.01e-08	4.98709e-09	51.3336	5e-08
Pt271	CFZ	4.98e-09	1.14047e-09	53.755	5e-08
Pt271	PANO	2.08e-08	9.74594e-09	71.3894	5e-08
Pt271	POM	No LD50	8.41768e-08	83.5147	1e-05
Pt271	BTZ	2.37e-09	8.83916e-10	41.9694	5e-08
Pt271	CFZ	1.66e-09	3.56142e-10	49.1201	5e-08
Pt271	DEX	9.07e-08	3.62988e-08	65.2256	1e-05
Pt271	LEN	No LD50	8.56101e-08	88.2871	1e-05
Pt271	MEL	5.81e-06	9.22925e-07	55.3425	5e-05
Pt271	PANO	4.33e-09	9.02664e-10	57.4697	5e-08
Pt271	POM	No LD50	5.332e-08	82.9276	1e-05
Pt273	BTZ	2.54e-09	9.33273e-10	40.4094	5e-08
Pt273	CFZ	1.12e-09	2.96996e-10	40.7686	5e-08
Pt273	PANO	2.06e-08	5.62996e-09	72.5843	5e-08
Pt273	POM	No LD50	No LD50	97.0408	1e-05
Pt276	BTZ	6.82e-09	4.28536e-09	41.5846	5e-08
Pt276	CFZ	6.72e-09	3.62956e-09	46.6729	5e-08
Pt276	PANO	2.95e-08	8.09505e-09	78.2103	5e-08
Pt276	POM	No LD50	8.1686e-06	94.3288	1e-05
Pt276	BTZ	2.89e-09	1.73606e-09	33.2058	5e-08
Pt276	CFZ	6.32e-09	3.77197e-09	43.4388	5e-08
Pt276	CPD22	1.45e-06	1.19702e-06	34.8408	1e-05
Pt276	DINA	1.32e-08	1.08944e-08	30.7773	1e-07
Pt276	JNK-IN-8	5.98e-06	3.37663e-06	78.1595	1e-05
Pt276	39621	No LD50	No LD50	99.8673	1e-05
Pt276	NU-7441	No LD50	6.01637e-06	93.1874	1e-05
Pt276	POM	No LD50	6.34668e-07	92.6151	1e-05
Pt276	PYR	5.99e-08	2.39516e-08	35.6623	1e-05
Pt276	R406	No LD50	1.51208e-06	84.7874	1e-05
Pt276	TAI-1	5.46e-07	1.72996e-07	25.7618	1e-05
Pt276	VOLA	2.22e-06	7.19387e-07	55.5479	1e-05
Pt276	VEN	No LD50	No LD50	100	1e-05
Pt276	BTZ	1.95e-09	1.24921e-09	30.1776	5e-08
Pt276	CFZ	3.5e-09	2.30114e-09	39.12	5e-08
Pt276	DARA	No LD50	No LD50	100	7e-06
Pt276	DEX	No LD50	No LD50	89.8212	1e-05
Pt276	DOX	7.78e-08	2.77972e-08	20.656	5e-06
Pt276	IXA	2.12e-08	1.47964e-08	62.774	5e-08
Pt276	LEN	No LD50	No LD50	99.9808	1e-05
Pt276	MEL	9.39e-07	3.04304e-07	27.377	5e-05
Pt276	PANO	1.37e-08	4.2814e-09	68.6827	5e-08
Pt276	POM	No LD50	7.95283e-06	95.1844	1e-05
Pt276	SILMI	5.18e-06	2.69405e-06	65.2473	1e-05
Pt276	VOLA	1.72e-06	7.08224e-07	44.4849	1e-05
Pt277	BTZ	3.55e-09	1.97048e-09	38.7056	5e-08
Pt277	CFZ	3.17e-09	1.57124e-09	48.222	5e-08
Pt277	PANO	1.45e-08	8.47095e-09	62.9843	5e-08
Pt277	POM	No LD50	3.60812e-06	92.1121	1e-05
Pt277	BTZ	3.26e-09	1.36035e-09	48.7581	5e-08
Pt277	CFZ	2.93e-09	4.45567e-10	52.5844	5e-08
Pt277	DEX	No LD50	5.35469e-08	81.5815	1e-05
Pt277	LEN	No LD50	No LD50	96.7189	1e-05
Pt277	MEL	6.05e-06	9.91614e-07	45.2016	5e-05
Pt277	PANO	2.51e-08	6.21359e-09	75.2088	5e-08
Pt277	POM	No LD50	No LD50	98.6578	1e-05
Pt278	BTZ	7.33e-09	2.47942e-09	61.242	5e-08
Pt278	CFZ	7.12e-09	4.25623e-09	55.1184	5e-08
Pt278	PANO	No LD50	3.93144e-08	95.4646	5e-08
Pt278	POM	No LD50	No LD50	99.9587	1e-05
Pt278	BTZ	5.44e-09	5.06142e-10	56.3535	5e-08
Pt278	CFZ	1.06e-08	6.13457e-10	63.0536	5e-08
Pt278	DEX	No LD50	8.66836e-06	86.8531	1e-05
Pt278	LEN	No LD50	No LD50	90.984	1e-05
Pt278	MEL	1.84e-05	1.60387e-05	56.3431	5e-05
Pt278	PANO	No LD50	2.03506e-08	86.1915	5e-08
Pt278	POM	No LD50	No LD50	90.7399	1e-05
Pt28	BTZ	1.84e-09	1.28084e-09	41.7554	5e-08
Pt28	CFZ	1.84e-09	1.28084e-09	41.7554	5e-08
Pt28	DEX	No LD50	No LD50	98.3868	1e-05
Pt28	DOX	4.61e-07	4.05954e-07	37.9232	5e-06
Pt28	LEN	No LD50	No LD50	100	1e-05
Pt28	MEL	1.62e-05	7.08659e-06	58.9903	5e-05
Pt28	POM	No LD50	No LD50	98.7995	1e-05
Pt280	VEN	2.59e-06	1.13274e-07	63.0644	1e-05
Pt280	BTZ	4.65e-09	2.02022e-09	54.9644	5e-08
Pt280	CFZ	4.99e-08	4.95396e-08	99.7465	5e-08
Pt280	DARA	No LD50	No LD50	99.6619	7e-06
Pt280	DEX	No LD50	No LD50	92.6824	1e-05
Pt280	DOX	2.76e-06	1.17722e-06	75.949	5e-06
Pt280	IXA	2.44e-08	1.01791e-08	76.0202	5e-08
Pt280	SELI	6.62e-06	8.37635e-07	72.0079	1e-05
Pt280	LEN	No LD50	No LD50	100	1e-05
Pt280	MEL	4.79e-07	1.91767e-07	32.715	5e-05
Pt280	PANO	2.94e-08	7.53468e-09	83.4623	5e-08
Pt280	POM	No LD50	No LD50	100	1e-05
Pt281	VEN	No LD50	9.15269e-06	91.7057	1e-05
Pt281	BTZ	1.05e-08	3.16301e-09	66.484	5e-08
Pt281	CFZ	No LD50	2.06517e-08	89.7459	5e-08
Pt281	DARA	No LD50	No LD50	91.3805	7e-06
Pt281	DEX	No LD50	No LD50	93.387	1e-05
Pt281	DOX	1.57e-06	6.59411e-07	71.7418	5e-06
Pt281	IXA	3.72e-08	1.12378e-08	79.8971	5e-08
Pt281	SELI	3.83e-06	8.06912e-08	63.9441	1e-05
Pt281	LEN	No LD50	No LD50	95.5845	1e-05
Pt281	MEL	2.64e-06	4.48596e-07	44.0726	5e-05
Pt281	PANO	No LD50	1.946e-08	89.8046	5e-08
Pt281	POM	No LD50	9.83302e-08	89.3956	1e-05
Pt282	VEN	No LD50	No LD50	94.3601	1e-05
Pt282	BTZ	8.17e-09	2.02691e-09	61.7475	5e-08
Pt282	CFZ	1.46e-08	4.43348e-09	67.307	5e-08
Pt282	DARA	No LD50	5.45341e-06	92.0131	7e-06
Pt282	DEX	No LD50	No LD50	87.5352	1e-05
Pt282	DOX	7.1e-07	1.80499e-07	59.9382	5e-06
Pt282	IXA	4.75e-08	2.1646e-08	84.0923	5e-08
Pt282	SELI	No LD50	8.48789e-07	79.2742	1e-05
Pt282	LEN	No LD50	No LD50	96.6381	1e-05
Pt282	MEL	2.44e-05	1.36716e-06	66.7034	5e-05
Pt282	PANO	3.32e-08	3.97835e-09	72.5846	5e-08
Pt282	POM	No LD50	No LD50	92.0448	1e-05
Pt283	VEN	No LD50	No LD50	93.6065	1e-05
Pt283	BTZ	2.78e-09	1.44266e-09	44.2489	5e-08
Pt283	CFZ	2.31e-09	8.25269e-10	48.05	5e-08
Pt283	DARA	No LD50	No LD50	97.4608	7e-06
Pt283	DEX	No LD50	9.70728e-08	80.1624	1e-05
Pt283	DOX	6.25e-07	2.90762e-07	52.9909	5e-06
Pt283	IXA	3.58e-08	2.21769e-08	80.2769	5e-08
Pt283	SELI	3.22e-06	2.47307e-07	68.4406	1e-05
Pt283	LEN	No LD50	No LD50	98.2056	1e-05
Pt283	MEL	2.67e-06	9.67571e-07	36.8327	5e-05
Pt283	PANO	2.51e-08	1.05193e-08	76.3405	5e-08
Pt283	POM	No LD50	No LD50	94.8241	1e-05
Pt285	BTZ	2.32e-08	8.63288e-09	72.9843	5e-08
Pt285	CFZ	1.31e-08	4.45623e-09	64.9087	5e-08
Pt285	PANO	1.55e-08	6.57251e-09	64.2871	5e-08
Pt285	POM	No LD50	No LD50	98.209	1e-05
Pt285	VEN	No LD50	1.23024e-07	79.5291	1e-05
Pt285	BTZ	9.68e-09	2.64363e-09	66.6542	5e-08
Pt285	CFZ	4.3e-08	4.03329e-09	76.8199	5e-08
Pt285	DARA	No LD50	No LD50	86.7481	7e-06
Pt285	DEX	No LD50	1.43768e-07	79.4289	1e-05
Pt285	DOX	2.98e-07	5.31986e-08	57.8993	5e-06
Pt285	IXA	No LD50	1.92848e-08	85.7771	5e-08
Pt285	SELI	5.95e-06	2.36773e-07	72.314	1e-05
Pt285	LEN	No LD50	No LD50	91.669	1e-05
Pt285	MEL	No LD50	2.19569e-07	68.5667	5e-05
Pt285	PANO	2.37e-08	3.63533e-10	70.6547	5e-08
Pt285	POM	No LD50	No LD50	91.3075	1e-05
Pt29	CFZ	1.04e-08	3.24798e-09	57.375	5e-08
Pt29	DEX	No LD50	No LD50	92.4123	1e-05
Pt29	DOX	5.19e-07	4.22713e-07	35.6157	5e-06
Pt29	LEN	No LD50	No LD50	100	1e-05
Pt29	MEL	8.08e-06	5.50514e-06	56.2289	5e-05
Pt29	POM	No LD50	No LD50	100	1e-05
Pt290	BTZ	1.04e-09	6.95876e-10	24.607	5e-08
Pt290	CFZ	1.63e-09	4.52691e-10	33.808	5e-08
Pt290	CPD22	2.06e-06	1.52661e-06	50.2605	1e-05
Pt290	DINA	1.56e-08	8.6351e-09	64.6033	1e-07
Pt290	JNK-IN-8	No LD50	5.56059e-06	91.1363	1e-05
Pt290	39621	No LD50	No LD50	100	1e-05
Pt290	NU-7441	No LD50	No LD50	100	1e-05
Pt290	POM	No LD50	No LD50	95.6648	1e-05
Pt290	PYR	1.31e-06	3.64504e-07	54.8959	1e-05
Pt290	R406	No LD50	No LD50	100	1e-05
Pt290	TAI-1	No LD50	No LD50	100	1e-05
Pt290	VOLA	6.65e-06	3.83992e-06	88.2951	1e-05
Pt290	VEN	No LD50	No LD50	93.1277	1e-05
Pt290	BTZ	3.15e-09	2.03719e-09	36.9174	5e-08
Pt290	CFZ	7.32e-09	2.39062e-09	50.0743	5e-08
Pt290	DARA	No LD50	No LD50	89.6468	7e-06
Pt290	DEX	No LD50	No LD50	100	1e-05
Pt290	DOX	6.05e-07	4.44704e-07	50.5182	5e-06
Pt290	IXA	2.61e-08	1.27049e-08	66.9552	5e-08
Pt290	SELI	No LD50	1.74845e-06	83.7596	1e-05
Pt290	LEN	No LD50	No LD50	100	1e-05
Pt290	MEL	1.83e-06	4.31628e-07	23.2661	5e-05
Pt290	PANO	2.68e-08	1.67273e-08	78.9336	5e-08
Pt290	POM	No LD50	No LD50	94.7345	1e-05
Pt291	BTZ	3.21e-09	2.06483e-09	37.2144	5e-08
Pt291	CFZ	3.97e-09	1.5203e-09	43.5455	5e-08
Pt291	PANO	4.33e-08	1.97179e-08	85.3689	5e-08
Pt291	POM	No LD50	No LD50	100	1e-05
Pt291	VEN	No LD50	8.17623e-08	86.4673	1e-05
Pt291	BTZ	9.15e-10	3.90962e-10	38.6335	5e-08
Pt291	CFZ	3.85e-09	1.2132e-09	45.3904	5e-08
Pt291	DARA	No LD50	No LD50	94.7779	7e-06
Pt291	DEX	No LD50	No LD50	98.1136	1e-05
Pt291	DOX	3.87e-07	1.75118e-07	45.9911	5e-06
Pt291	IXA	1.79e-08	4.01181e-09	71.0124	5e-08
Pt291	SELI	6.42e-06	1.64257e-07	73.9073	1e-05
Pt291	LEN	No LD50	No LD50	95.7766	1e-05
Pt291	MEL	1.15e-06	2.57841e-07	35.3409	5e-05
Pt291	PANO	1.38e-08	2.51908e-09	66.2681	5e-08
Pt291	POM	No LD50	No LD50	100	1e-05
Pt292	BTZ	1.96e-08	8.14222e-09	69.2369	5e-08
Pt292	CFZ	2.37e-08	9.00851e-09	73.5369	5e-08
Pt292	PANO	No LD50	1.09151e-08	83.0076	5e-08
Pt292	POM	No LD50	No LD50	94.8524	1e-05
[truncated: 2,941 more rows]

## Sheet: DrugNames & Targets
DrugCode	DrugName	Maximum Concentration (M)	Drug Class	Targets or Action of Drug
BTZ	Bortezomib	5e-08	Proteasome Inhibitor	20S Proteasome Inhibitor
CFZ	Carfilzomib	5e-08	Proteasome Inhibitor	Irreversible Proteasome Inhibitor
MEL	Melphalan	5e-05	DNA Damaging Agent	Phenylalanine Derivative of Nitrogen Mustard
PANO	Panobinostat	5e-08	HDAC Inhibitor	Broad-spectrum HDAC Inhibitor
POM	Pomalidomide	1e-05	Immunomodulatory Agent	Inhibitor of LPS-induced TNF-Alpha Release and E3 Ligase protein Cereblon (CRBN)
DEX	Dexamethasone	1e-05	Glucocorticosteroid	Glucocorticoid Steroid and Interleukin Receptor Modulator
LEN	Lenalidomide	1e-05	Immunomodulatory Agent	Inhibitor of TNF-Alpha Secretion and E3 Ligase protein Cereblon (CRBN)
VEN	Venetoclax	1e-05	BCL-2 Inhibitor	Selective BCL-2 Inhibitor
IXA	Ixazomib	5e-08	Proteasome Inhibitor	Inhibitor Chymotripsin-like Protelytic (b5) Site of the 20S Proteasome.
SELI	Selinexor	1e-05	Nuclear Export Inhibitor	Selective CRM1 Inhibitor
DOX	Doxorubicin	5e-06	DNA Damaging Agent	DNA Toposiomerase II Inhibitor
DARA	Daratumumab	7e-06	Monoclonal Antibody	Recombinant monoclonal antibody to CD38
VOLA	Volasertib	1e-05	Kinase Inhibitor	Selective PLK1 Inhibitor
ELE	Elevenostat	1e-07	HDAC Inhibitor	Selective HDAC11 Inhibitor
INK128	INK-128	1e-05	Kinase Inhibitor	Selective mTOR(TORC-1/-2) inhibitor
ELO	Elotuzumab	2.33e-06	Monoclonal Antibody	anti-SLAMF7 Monoclonal Antibody
CPD22	CPD22	1e-05	Kinase Inhibitor	ILK Inhibitor
DEFA	Defactinib	2e-05	Kinase Inhibitor	FAK Inhibitor
DINA	Dinaciclib	1e-07	Kinase Inhibitor	CDK2, CDK5, CDK1, and CDK9 Inhibitor
BI2536	BI2536	1e-05	Kinase Inhibitor	PLK1, PLK2, PLK3 Inhibitor
THZ1	THZ1	1e-05	Kinase Inhibitor	Covalent CDK7 Inhibitor
SILMI	Silmitasertib	1e-05	Kinase Inhibitor	Selective Inhibitor of CK2 (Casein Kinase 2)
JNK-IN-8	JNK-IN-8	1e-05	Kinase Inhibitor	JNK1, JNK2, JNK3 Inhibitor
MK2206	MK2206	1e-05	Kinase Inhibitor	Highly Selective AKT1, AKT2, AKT3 Inhibitor
NU-7441	NU-7441	1e-05	Kinase Inhibitor	Highly Selective DNA-PK Inhibitor
R406	R406	1e-05	Kinase Inhibitor	SYK Inhibitor
TAI-1	TAI-1	1e-05	Kinase Inhibitor	Specific HEC1 Inhibitor
39621	39621	1e-05	Kinase Inhibitor	MARK/PAR-1 Inhibitor
PALB	Palbociclib	1e-05	Kinase Inhibitor	CDK4 and CDK6 Inhibitor
RUXO	Ruxolitinib	1e-05	Kinase Inhibitor	JAK1 and JAK2 Inhibitor
CRIZ	Crizotinib	1e-05	Kinase Inhibitor	c-Met and ALK Inhibitor
PONA	Ponatinib	1e-05	Kinase Inhibitor	ABL, PDGFR-Alpha, VEGFR2, FGFR1 and SRC Inhibitor
PYR	Pyrvinium	1e-05	Antihelmintic Agent	Antiheminitic Effective for Pinworms
RICO	Ricolinostat	1e-05	Kinase Inhibitor	Selective HDAC6 Inhibitor
ALI	Alisertib	1e-05	Kinase Inhibitor	Selective Aurora A Inhibitor
DABRA	Dabrafenib	1e-05	Kinase Inhibitor	Mutatnt BRAFV600 Inhibitor
MOTE	Motesanib	1e-05	Kinase Inhibitor	Receptor Tyrosine Kinase Inhibitor
